# Supplementary material for: Potential regulatory genes of light induced anthocyanin accumulation in sweet cherry identified by combining transcriptome and metabolome analysis
Source: Front Plant Sci. 2023 Aug 16;14:1238624. doi: 10.3389/fpls.2023.1238624 (PMC10469515; doi:10.3389/fpls.2023.1238624)
Supplement: Supplementary file 5 [file Table_1.xlsx]

## Sheet: S1
table S1 sequences of primers used in qRT-PCR and the pearson’s correlation coefficient between qPCR relative quantitative values and fpkm values
Gene name	Gene ID	Primer sequence(5′-3′)	Pearson’s correlation coefficient
4CL1	Pav_sc0000071.1_g120.1.mk	F-CTGGCGAAGCAGAGCGTTGT	0.916
		R-CGCACTCCTCCATCACATCCTT
4CL2	Pav_sc0000480.1_g840.1.mk	F-TCAGGTGGCACCAGCAGAACTT	0.991
		R-AACCTCACCAGCTTCGGCATCA
4CL3	Pav_sc0000359.1_g100.1.mk	F-GCAACACTGGCGAGACCTACAC	0.992
		R-GGCAGTTCTGGAGGAGGAGCAT
RVE1	Pav_sc0001124.1_g320.1.mk	F-TCCATTCCATAAGCCGCAAGCA	0.811
		R-TCCAGCATCTGAACCAGTCCAA
RVE2	Pav_sc0000103.1_g1460.1.mk	F-AGAGTCCGTGCCATCAGTTCAA	0.947
		R-GACTGCCAGCATCTCCTTCTGT
HCT1	Pav_sc0002479.1_g160.1.br	F-GACCCTCCTCTGCCTGAACACT	0.892
		R-CAGCGTCACCATCTCTCCCTTG
LHY	Pav_sc0001046.1_g450.1.mk	F-CAGCGAGAGCGATGGACACAT	0.939
		R-GCGGAGGCGGAATATCAATGC
NFX1	Pav_sc0000103.1_g970.1.mk	F-AGAGTCGGCAGCAGCAGAGA	0.99
		R-CCTCCTCCTGATTCTCGCTCCT
NAC2	Pav_sc0000484.1_g580.1.mk	F-TCCTGCTTCTCCGATCCGATGG	0.955
		R-TGTGGTTGCTGTTGCTGCTGTT
NAC3	Pav_sc0001825.1_g250.1.mk	F-ATCATGCACGAGTACCGCCTTG	0.913
		R-CTGGAGTAGTCCGTCGTCTGCT
ERF4	Pav_sc0001488.1_g330.1.mk	F-CCACCGCCACATACCGAAGAA	0.992
		R-CAACCAAGCCTCTGCCATATCC
HSF4	Pav_sc0000597.1_g270.1.mk	F-CTGCTGCGGCGAATGATATGTT	0.965
		R-CGCTCACTCTGCCATCACTATC
LBD	novel.61	F-TCTGCCTCCTACTCCAACTC	0.978
		R-CATAAACCATGCTGCTCACT

## Sheet: S2
table s2 Transcriptome sequencing data of all samples.
sample	raw_reads	clean_reads	total_map
LHD39_1	45364958	44882500	42977709(95.76%)
LHD39_2	46558604	45849224	43813775(95.56%)
LHD39_3	54500878	53582100	51102973(95.37%)
LHD47_1	45957602	45200890	42682147(94.43%)
LHD47_2	47279878	46057308	43935975(95.39%)
LHD47_3	46937896	46247694	44033539(95.21%)
LHD55_1	51679734	50858380	47940680(94.26%)
LHD55_2	47741832	47087416	44500428(94.51%)
LHD55_3	48001030	47245328	45057609(95.37%)
LHD63_1	55129100	53316220	49030901(91.96%)
LHD63_2	53066696	52029416	49311672(94.78%)
LHD63_3	45328894	44730630	41473278(92.72%)
SHD39_1	47167842	46193512	44233247(95.76%)
SHD39_2	47401746	46511842	44650100(96.0%)
SHD39_3	51962208	50907548	48969445(96.19%)
SHD47_1	50344954	49585590	47312882(95.42%)
SHD47_2	46647674	45930498	43679333(95.1%)
SHD47_3	54402338	53606634	51095147(95.31%)
SHD55_1	43990440	43120284	41049848(95.2%)
SHD55_2	46490566	45873462	43712730(95.29%)
SHD55_3	46252184	45640578	43463807(95.23%)
SHD63_1	45526588	44934734	42840250(95.34%)
SHD63_2	51912318	51175150	48687793(95.14%)
SHD63_3	45374280	44782356	42586543(95.1%)
RHD63_1	53617950	52648172	49884016(94.75%)
RHD63_2	47396598	44698912	42231508(94.48%)
RHD63_3	47468406	46717882	44381093(95.0%)

## Sheet: S3
table S3 20 KEGG pathways co-enriched by DEMs and DEMs
SHD39vsLHD39		SHD47vsLHD47		SHD55vsLHD55		SHD63vsLHD63
KEGG pathway name	-log10(p value)	KEGG pathway name	-log10(p value)	KEGG pathway name	-log10(p value)	KEGG pathway name	-log10(p value)
DNA replication	8.88	Photosynthesis	2.29	Plant-pathogen interaction	3.52	Phenylpropanoid biosynthesis	4.33
Tyrosine metabolism	2.83	MAPK signaling pathway - plant	1.61	Plant hormone signal transduction	2.03	Glutathione metabolism	4.13
Glycolysis / Gluconeogenesis	2.56	Inositol phosphate metabolism	1.51	Phenylpropanoid biosynthesis	1.68	Ascorbate and aldarate metabolism	3.4
Carbon fixation in photosynthetic organisms	2.08	Sulfur metabolism	1.34	Brassinosteroid biosynthesis	1.65	Nitrogen metabolism	2.66
Photosynthesis - antenna proteins	1.89	Plant hormone signal transduction	1.22	Glutathione metabolism	1.53	Amino sugar and nucleotide sugar metabolism	2.65
Carbon metabolism	1.78	Cyanoamino acid metabolism	1.2	Sulfur metabolism	1.47	Stilbenoid, diarylheptanoid and gingerol biosynthesis	1.92
alpha-Linolenic acid metabolism	1.76	Ascorbate and aldarate metabolism	1.16	Circadian rhythm - plant	1.33	Plant-pathogen interaction	1.58
Homologous recombination	1.74	Tyrosine metabolism	1.08	Phosphatidylinositol signaling system	1.01	Pentose and glucuronate interconversions	1.58
Fatty acid degradation	1.72	alpha-Linolenic acid metabolism	1.06	Diterpenoid biosynthesis	0.83	Cutin, suberine and wax biosynthesis	1.36
Cysteine and methionine metabolism	1.64	Galactose metabolism	1.04	Stilbenoid, diarylheptanoid and gingerol biosynthesis	0.73	Photosynthesis	1.1
Brassinosteroid biosynthesis	1.57	Fatty acid degradation	0.97	Fatty acid elongation	0.69	MAPK signaling pathway - plant	1.08
Pyrimidine metabolism	1.56	AGE-RAGE signaling pathway in diabetic complications	0.91	ABC transporters	0.59	Glycerophospholipid metabolism	1.02
Sulfur metabolism	1.3	Phenylpropanoid biosynthesis	0.9	Carotenoid biosynthesis	0.58	Linoleic acid metabolism	0.98
Phenylalanine, tyrosine and tryptophan biosynthesis	1.2	Amino sugar and nucleotide sugar metabolism	0.88	MAPK signaling pathway - plant	0.57	Valine, leucine and isoleucine degradation	0.94
Mismatch repair	1.2	Photosynthesis - antenna proteins	0.85	Cyanoamino acid metabolism	0.53	Isoquinoline alkaloid biosynthesis	0.92
Cyanoamino acid metabolism	1.18	Carbon fixation in photosynthetic organisms	0.75	Base excision repair	0.5	Galactose metabolism	0.91
Circadian rhythm - plant	1.16	Sesquiterpenoid and triterpenoid biosynthesis	0.73	Starch and sucrose metabolism	0.48	Cysteine and methionine metabolism	0.91
Biosynthesis of amino acids	0.97	Glutathione metabolism	0.72	Protein export	0.46	Tyrosine metabolism	0.91
Glycosphingolipid biosynthesis - globo and isoglobo series	0.95	Tropane, piperidine and pyridine alkaloid biosynthesis	0.69	Galactose metabolism	0.44	beta-Alanine metabolism	0.87
Nucleotide excision repair	0.85	Isoquinoline alkaloid biosynthesis	0.67	Flavonoid biosynthesis	0.42	Sulfur metabolism	0.8

## Sheet: S4
table S4 11 modules of 4217 DEGs
Gene ID	Module
Pav_sc0002493.1_g100.1.mk	blue
Pav_sc0002842.1_g230.1.mk	blue
Pav_sc0000254.1_g1570.1.mk	blue
Pav_sc0001831.1_g160.1.mk	blue
Pav_sc0004204.1_g020.1.mk	blue
Pav_sc0002360.1_g760.1.mk	turquoise
Pav_sc0008910.1_g010.1.mk	blue
Pav_sc0000706.1_g080.1.mk	black
Pav_sc0002360.1_g010.1.mk	black
Pav_sc0000129.1_g1650.1.mk	black
Pav_sc0000731.1_g100.1.br	blue
Pav_sc0006061.1_g110.1.mk	blue
Pav_sc0001488.1_g320.1.mk	black
Pav_sc0000062.1_g400.1.mk	yellow
Pav_sc0000395.1_g270.1.mk	turquoise
Pav_sc0000323.1_g260.1.mk	blue
Pav_sc0001027.1_g080.1.br	yellow
Pav_sc0000464.1_g130.1.br	blue
Pav_sc0000890.1_g1520.1.mk	brown
Pav_sc0006359.1_g070.1.mk	blue
Pav_co4061311.1_g010.1.br	blue
Pav_sc0000403.1_g100.1.br	blue
Pav_sc0000055.1_g210.1.mk	turquoise
Pav_sc0002842.1_g280.1.mk	blue
Pav_sc0001029.1_g010.1.mk	yellow
Pav_sc0000419.1_g100.1.mk	blue
Pav_sc0002360.1_g740.1.mk	purple
Pav_sc0000907.1_g490.1.mk	yellow
Pav_sc0000174.1_g1620.1.br	blue
Pav_sc0002360.1_g730.1.mk	purple
Pav_sc0001102.1_g1150.1.mk	yellow
Pav_sc0001580.1_g190.1.mk	black
Pav_sc0000370.1_g900.1.mk	blue
Pav_sc0001015.1_g230.1.mk	turquoise
Pav_sc0002181.1_g020.1.mk	brown
Pav_co4088985.1_g020.1.mk	yellow
Pav_sc0001710.1_g1680.1.mk	black
Pav_sc0000254.1_g420.1.mk	blue
Pav_sc0000762.1_g100.1.mk	brown
Pav_sc0003562.1_g100.1.mk	blue
Pav_sc0003492.1_g160.1.mk	blue
Pav_sc0000465.1_g1040.1.mk	yellow
Pav_co4085467.1_g010.1.mk	blue
Pav_sc0000212.1_g1230.1.mk	blue
Pav_sc0001236.1_g220.1.mk	blue
Pav_sc0001275.1_g040.1.mk	blue
Pav_sc0000852.1_g390.1.mk	blue
Pav_sc0000454.1_g070.1.mk	black
Pav_sc0000418.1_g140.1.mk	turquoise
Pav_sc0001580.1_g300.1.mk	pink
Pav_sc0000026.1_g750.1.br	blue
Pav_sc0000383.1_g180.1.mk	black
Pav_sc0007796.1_g160.1.mk	blue
Pav_sc0001031.1_g320.1.br	blue
Pav_sc0000358.1_g260.1.mk	black
Pav_sc0002828.1_g660.1.mk	turquoise
Pav_sc0001299.1_g080.1.mk	magenta
Pav_sc0000404.1_g050.1.mk	blue
Pav_sc0001545.1_g020.1.mk	black
Pav_sc0000051.1_g330.1.mk	turquoise
Pav_sc0001846.1_g080.1.br	purple
Pav_sc0000480.1_g730.1.mk	blue
Pav_sc0000157.1_g770.1.mk	blue
Pav_sc0001080.1_g1060.1.mk	brown
Pav_sc0000072.1_g320.1.mk	blue
Pav_sc0001364.1_g140.1.mk	blue
Pav_sc0001181.1_g740.1.mk	black
Pav_sc0000195.1_g750.1.mk	black
Pav_sc0000351.1_g470.1.mk	turquoise
Pav_sc0000663.1_g110.1.mk	blue
Pav_sc0003800.1_g020.1.mk	black
Pav_sc0000648.1_g180.1.mk	blue
Pav_sc0000704.1_g390.1.mk	blue
Pav_sc0001215.1_g370.1.mk	blue
Pav_sc0003135.1_g350.1.mk	blue
Pav_sc0001341.1_g020.1.mk	black
Pav_sc0000700.1_g1470.1.mk	yellow
Pav_sc0010598.1_g010.1.mk	black
Pav_sc0000130.1_g080.1.mk	black
Pav_sc0000910.1_g690.1.mk	turquoise
Pav_sc0005031.1_g010.1.br	brown
Pav_sc0000024.1_g280.1.br	turquoise
Pav_sc0000299.1_g210.1.mk	black
Pav_sc0000136.1_g410.1.br	blue
Pav_sc0001224.1_g080.1.mk	red
Pav_sc0000157.1_g060.1.mk	black
Pav_sc0000677.1_g300.1.mk	brown
Pav_sc0000024.1_g160.1.mk	brown
Pav_sc0000396.1_g1000.1.mk	black
Pav_sc0001518.1_g620.1.mk	black
Pav_sc0000164.1_g170.1.mk	turquoise
novel.1316	turquoise
Pav_sc0001405.1_g970.1.mk	turquoise
Pav_sc0000078.1_g010.1.mk	black
Pav_sc0001478.1_g190.1.mk	blue
Pav_sc0000099.1_g440.1.mk	black
Pav_sc0000099.1_g450.1.mk	black
Pav_sc0001215.1_g180.1.mk	blue
Pav_sc0000136.1_g030.1.mk	turquoise
Pav_sc0000358.1_g950.1.mk	black
Pav_sc0000030.1_g1530.1.mk	black
Pav_sc0002360.1_g750.1.mk	purple
Pav_sc0000129.1_g1160.1.br	blue
Pav_sc0000111.1_g020.1.mk	magenta
novel.568	blue
Pav_sc0000861.1_g130.1.mk	blue
Pav_sc0000780.1_g050.1.mk	turquoise
Pav_sc0000908.1_g270.1.mk	blue
Pav_sc0002456.1_g180.1.mk	blue
Pav_sc0003915.1_g070.1.mk	black
Pav_sc0003193.1_g260.1.br	turquoise
Pav_sc0003682.1_g120.1.br	turquoise
Pav_sc0001583.1_g330.1.mk	blue
Pav_sc0001623.1_g310.1.mk	turquoise
Pav_sc0000909.1_g610.1.br	blue
Pav_sc0000071.1_g470.1.mk	black
Pav_sc0003562.1_g190.1.mk	black
Pav_sc0000766.1_g030.1.mk	turquoise
Pav_sc0000370.1_g290.1.mk	blue
Pav_sc0000638.1_g130.1.mk	black
Pav_sc0001687.1_g190.1.mk	blue
Pav_sc0000484.1_g690.1.mk	turquoise
Pav_sc0000912.1_g050.1.mk	brown
Pav_sc0000174.1_g740.1.mk	yellow
novel.517	blue
novel.771	red
Pav_sc0000376.1_g640.1.mk	blue
Pav_sc0000558.1_g320.1.mk	turquoise
Pav_sc0000764.1_g160.1.mk	turquoise
Pav_sc0000700.1_g900.1.mk	turquoise
Pav_sc0000675.1_g880.1.br	blue
Pav_sc0009744.1_g010.1.mk	black
Pav_sc0001900.1_g140.1.mk	black
Pav_sc0000589.1_g080.1.mk	blue
Pav_sc0000549.1_g1050.1.mk	black
novel.1050	black
novel.74	blue
Pav_sc0002024.1_g060.1.br	green
Pav_sc0001888.1_g100.1.mk	black
Pav_sc0001196.1_g440.1.br	yellow
Pav_sc0000103.1_g1780.1.mk	turquoise
Pav_sc0000852.1_g460.1.mk	blue
Pav_sc0001196.1_g1950.1.mk	blue
Pav_sc0001450.1_g080.1.mk	yellow
Pav_sc0001196.1_g620.1.mk	turquoise
Pav_sc0000009.1_g380.1.br	turquoise
Pav_sc0000063.1_g110.1.mk	yellow
Pav_sc0000311.1_g880.1.br	turquoise
Pav_sc0000093.1_g210.1.mk	brown
Pav_sc0001859.1_g020.1.mk	brown
Pav_sc0000910.1_g930.1.mk	black
Pav_sc0000661.1_g500.1.mk	purple
Pav_sc0003169.1_g020.1.br	turquoise
Pav_sc0002304.1_g040.1.mk	black
Pav_sc0000562.1_g100.1.mk	blue
Pav_sc0002842.1_g220.1.mk	purple
Pav_sc0000065.1_g730.1.mk	black
Pav_sc0001003.1_g150.1.mk	black
Pav_sc0000024.1_g270.1.mk	turquoise
Pav_sc0000184.1_g190.1.mk	turquoise
Pav_sc0003562.1_g350.1.mk	turquoise
Pav_sc0001175.1_g420.1.mk	turquoise
Pav_sc0000554.1_g1420.1.br	black
Pav_sc0001305.1_g060.1.mk	blue
Pav_sc0004851.1_g030.1.mk	brown
Pav_sc0000175.1_g270.1.mk	turquoise
Pav_sc0000998.1_g640.1.mk	black
Pav_sc0006018.1_g020.1.mk	brown
Pav_sc0000051.1_g400.1.mk	grey
Pav_sc0003193.1_g250.1.mk	turquoise
Pav_sc0000852.1_g020.1.mk	blue
Pav_sc0000491.1_g1090.1.mk	turquoise
Pav_sc0000174.1_g1390.1.mk	black
novel.873	blue
Pav_sc0000099.1_g880.1.mk	turquoise
Pav_sc0001289.1_g570.1.mk	turquoise
Pav_sc0001825.1_g200.1.mk	turquoise
Pav_co4031323.1_g010.1.mk	black
Pav_sc0009583.1_g010.1.mk	blue
Pav_sc0000026.1_g520.1.mk	blue
Pav_sc0000554.1_g920.1.mk	black
Pav_sc0000257.1_g210.1.mk	yellow
Pav_sc0001673.1_g140.1.mk	black
Pav_sc0000293.1_g330.1.mk	yellow
Pav_sc0011895.1_g020.1.mk	turquoise
Pav_sc0000440.1_g200.1.mk	turquoise
Pav_sc0000893.1_g420.1.mk	turquoise
Pav_sc0001309.1_g960.1.mk	black
Pav_sc0000912.1_g180.1.mk	magenta
Pav_sc0000311.1_g030.1.mk	turquoise
Pav_sc0000195.1_g960.1.mk	magenta
Pav_sc0004033.1_g010.1.mk	turquoise
Pav_sc0003135.1_g470.1.mk	blue
Pav_sc0000349.1_g070.1.mk	purple
Pav_sc0001416.1_g170.1.mk	black
Pav_sc0000890.1_g660.1.mk	blue
novel.484	black
Pav_sc0000009.1_g1290.1.br	turquoise
Pav_sc0008112.1_g020.1.mk	green
Pav_sc0001073.1_g080.1.mk	turquoise
Pav_sc0000071.1_g550.1.mk	black
Pav_sc0000028.1_g830.1.mk	yellow
Pav_sc0001059.1_g600.1.br	turquoise
Pav_sc0000157.1_g730.1.mk	brown
novel.239	red
Pav_sc0003804.1_g010.1.br	blue
Pav_sc0011774.1_g030.1.mk	black
Pav_sc0002233.1_g150.1.mk	turquoise
Pav_sc0001134.1_g190.1.mk	blue
Pav_sc0002635.1_g050.1.mk	turquoise
Pav_sc0000554.1_g330.1.mk	brown
Pav_sc0001911.1_g160.1.mk	blue
Pav_sc0000675.1_g1140.1.mk	turquoise
Pav_sc0000410.1_g810.1.mk	black
novel.1042	turquoise
Pav_sc0001869.1_g730.1.mk	black
Pav_sc0001077.1_g280.1.mk	turquoise
Pav_sc0001582.1_g320.1.mk	yellow
Pav_sc0001099.1_g010.1.mk	black
Pav_sc0000157.1_g790.1.mk	black
Pav_sc0000500.1_g560.1.mk	black
Pav_sc0000886.1_g690.1.mk	turquoise
Pav_sc0001962.1_g040.1.br	black
Pav_sc0000102.1_g430.1.mk	blue
Pav_sc0000036.1_g040.1.br	blue
Pav_sc0001988.1_g010.1.br	black
Pav_sc0001397.1_g040.1.mk	black
Pav_sc0000652.1_g1200.1.mk	grey
Pav_sc0000481.1_g330.1.mk	black
Pav_sc0001181.1_g1190.1.mk	red
Pav_sc0001251.1_g410.1.mk	brown
novel.1200	blue
Pav_sc0008387.1_g010.1.br	grey
Pav_sc0000747.1_g130.1.mk	brown
Pav_sc0001710.1_g1350.1.mk	turquoise
Pav_sc0000251.1_g160.1.mk	blue
Pav_sc0001900.1_g200.1.br	turquoise
Pav_sc0000072.1_g120.1.br	turquoise
Pav_sc0000102.1_g360.1.mk	turquoise
Pav_sc0000910.1_g920.1.mk	black
Pav_sc0002659.1_g070.1.br	blue
Pav_sc0000863.1_g060.1.br	grey
Pav_sc0000583.1_g810.1.mk	blue
Pav_sc0000507.1_g210.1.br	brown
Pav_sc0000006.1_g120.1.mk	blue
Pav_sc0002024.1_g070.1.mk	black
Pav_sc0000405.1_g680.1.mk	yellow
Pav_sc0000124.1_g140.1.mk	red
Pav_sc0010978.1_g010.1.br	blue
Pav_sc0000103.1_g1460.1.mk	turquoise
Pav_sc0003567.1_g080.1.br	yellow
Pav_sc0012105.1_g010.1.mk	green
novel.779	black
Pav_sc0000355.1_g300.1.mk	black
novel.262	blue
Pav_sc0001502.1_g540.1.mk	blue
Pav_sc0001699.1_g690.1.mk	turquoise
Pav_sc0000677.1_g290.1.br	brown
Pav_sc0000780.1_g210.1.mk	turquoise
Pav_sc0000702.1_g570.1.br	brown
Pav_sc0004042.1_g020.1.mk	blue
Pav_sc0000229.1_g020.1.mk	blue
Pav_sc0000998.1_g450.1.br	turquoise
Pav_sc0000381.1_g240.1.mk	turquoise
Pav_sc0000212.1_g1900.1.mk	blue
Pav_sc0000586.1_g760.1.mk	blue
Pav_sc0004628.1_g040.1.br	pink
Pav_sc0000138.1_g610.1.mk	red
Pav_sc0000852.1_g1020.1.br	blue
Pav_sc0001368.1_g030.1.br	magenta
Pav_sc0001883.1_g220.1.br	blue
Pav_sc0001111.1_g280.1.mk	blue
Pav_sc0008024.1_g020.1.br	blue
Pav_sc0001051.1_g080.1.mk	turquoise
Pav_sc0001479.1_g070.1.mk	turquoise
Pav_sc0005070.1_g030.1.mk	blue
Pav_sc0000582.1_g050.1.mk	black
Pav_sc0000789.1_g480.1.br	blue
Pav_sc0000863.1_g120.1.mk	brown
Pav_sc0002181.1_g360.1.br	blue
Pav_sc0001740.1_g140.1.br	grey
Pav_sc0001175.1_g410.1.br	turquoise
Pav_sc0000373.1_g500.1.mk	turquoise
Pav_sc0000764.1_g280.1.br	blue
Pav_sc0000311.1_g370.1.mk	blue
Pav_sc0001171.1_g390.1.mk	blue
Pav_sc0000886.1_g680.1.mk	turquoise
Pav_sc0000598.1_g260.1.mk	blue
Pav_sc0001015.1_g080.1.mk	blue
Pav_sc0000348.1_g820.1.mk	blue
Pav_sc0000500.1_g480.1.mk	brown
Pav_sc0000069.1_g350.1.mk	blue
Pav_sc0000051.1_g170.1.mk	blue
Pav_sc0001197.1_g100.1.mk	turquoise
Pav_sc0003138.1_g230.1.mk	blue
Pav_sc0000254.1_g950.1.mk	brown
Pav_sc0000586.1_g840.1.mk	magenta
Pav_sc0003323.1_g100.1.mk	brown
Pav_sc0006926.1_g010.1.br	black
Pav_sc0000910.1_g200.1.mk	turquoise
Pav_sc0000044.1_g560.1.mk	blue
Pav_sc0000410.1_g680.1.mk	blue
Pav_sc0000259.1_g180.1.mk	turquoise
novel.321	brown
Pav_sc0001118.1_g030.1.mk	brown
Pav_sc0000094.1_g320.1.mk	turquoise
Pav_sc0000003.1_g010.1.mk	blue
Pav_sc0000558.1_g440.1.mk	blue
Pav_sc0000863.1_g110.1.mk	brown
Pav_sc0000449.1_g420.1.mk	blue
Pav_sc0000617.1_g170.1.mk	blue
Pav_sc0000557.1_g1170.1.mk	brown
Pav_sc0001862.1_g290.1.mk	blue
Pav_sc0001582.1_g430.1.mk	brown
Pav_sc0001575.1_g010.1.mk	brown
Pav_sc0000195.1_g190.1.mk	blue
Pav_sc0000979.1_g140.1.mk	blue
Pav_sc0002360.1_g510.1.mk	blue
Pav_sc0000843.1_g410.1.mk	magenta
Pav_co4056605.1_g010.1.br	grey
Pav_sc0001465.1_g140.1.mk	blue
Pav_sc0000893.1_g760.1.mk	magenta
Pav_sc0002403.1_g070.1.mk	blue
Pav_sc0001073.1_g010.1.mk	grey
Pav_sc0000207.1_g720.1.mk	blue
Pav_sc0005917.1_g040.1.br	brown
Pav_sc0002327.1_g180.1.mk	brown
Pav_sc0000823.1_g600.1.mk	turquoise
Pav_sc0000754.1_g240.1.mk	turquoise
Pav_sc0001147.1_g140.1.mk	turquoise
Pav_sc0000567.1_g060.1.mk	blue
Pav_sc0000373.1_g580.1.mk	turquoise
Pav_sc0000143.1_g300.1.mk	blue
Pav_sc0000015.1_g210.1.mk	turquoise
Pav_sc0000028.1_g470.1.mk	blue
Pav_sc0000845.1_g240.1.mk	magenta
Pav_sc0000422.1_g080.1.mk	blue
Pav_sc0000584.1_g730.1.mk	black
Pav_sc0006402.1_g100.1.mk	blue
Pav_sc0001545.1_g130.1.mk	blue
Pav_sc0000567.1_g740.1.mk	brown
Pav_sc0000030.1_g130.1.mk	purple
Pav_sc0000554.1_g290.1.mk	yellow
Pav_sc0000069.1_g200.1.mk	turquoise
Pav_sc0000474.1_g220.1.mk	blue
Pav_sc0000775.1_g300.1.mk	turquoise
Pav_sc0000704.1_g940.1.mk	red
Pav_sc0000358.1_g850.1.mk	brown
Pav_sc0000480.1_g1090.1.mk	blue
Pav_sc0000030.1_g140.1.mk	blue
Pav_sc0000373.1_g080.1.mk	turquoise
Pav_sc0000736.1_g550.1.mk	brown
Pav_sc0001801.1_g690.1.mk	magenta
Pav_sc0000418.1_g330.1.mk	magenta
Pav_sc0000348.1_g260.1.mk	green
Pav_sc0000556.1_g090.1.mk	blue
Pav_sc0001046.1_g560.1.mk	blue
Pav_sc0002009.1_g110.1.mk	black
Pav_sc0001102.1_g920.1.mk	red
Pav_sc0000100.1_g070.1.br	brown
Pav_sc0000030.1_g1280.1.mk	blue
novel.705	magenta
Pav_sc0005174.1_g010.1.mk	brown
Pav_sc0000221.1_g500.1.mk	blue
Pav_sc0001582.1_g140.1.mk	brown
Pav_sc0002659.1_g110.1.mk	brown
Pav_sc0006464.1_g040.1.mk	blue
Pav_sc0000617.1_g180.1.mk	blue
Pav_sc0001900.1_g120.1.mk	brown
Pav_sc0001341.1_g190.1.mk	blue
Pav_sc0000800.1_g840.1.mk	blue
Pav_sc0000037.1_g450.1.mk	turquoise
Pav_sc0000129.1_g1630.1.mk	brown
Pav_sc0000099.1_g920.1.mk	red
Pav_sc0000395.1_g200.1.mk	blue
Pav_sc0001084.1_g100.1.mk	turquoise
Pav_sc0002690.1_g010.1.mk	brown
Pav_co4061467.1_g010.1.br	magenta
Pav_co4000579.1_g010.1.mk	blue
Pav_sc0001183.1_g230.1.br	black
Pav_sc0000586.1_g190.1.mk	blue
Pav_sc0002231.1_g050.1.br	blue
Pav_sc0003823.1_g160.1.mk	turquoise
Pav_sc0000129.1_g1800.1.mk	turquoise
Pav_sc0008045.1_g040.1.mk	blue
Pav_sc0000009.1_g1210.1.mk	turquoise
Pav_sc0002858.1_g270.1.br	blue
Pav_sc0000373.1_g570.1.mk	black
Pav_sc0002451.1_g020.1.mk	yellow
Pav_sc0002233.1_g110.1.mk	blue
Pav_sc0002971.1_g010.1.mk	blue
Pav_sc0001801.1_g160.1.mk	magenta
Pav_sc0001528.1_g510.1.mk	brown
Pav_sc0001529.1_g020.1.mk	blue
Pav_sc0001794.1_g250.1.mk	blue
Pav_sc0001643.1_g020.1.mk	blue
Pav_sc0001405.1_g240.1.br	blue
Pav_sc0000017.1_g020.1.mk	blue
Pav_sc0000599.1_g210.1.mk	blue
Pav_sc0003043.1_g100.1.mk	turquoise
Pav_sc0000800.1_g1580.1.mk	yellow
Pav_sc0001196.1_g890.1.mk	blue
Pav_sc0000099.1_g910.1.mk	turquoise
Pav_sc0001335.1_g550.1.mk	blue
Pav_sc0000231.1_g950.1.mk	magenta
Pav_sc0001405.1_g570.1.mk	turquoise
Pav_sc0000138.1_g280.1.mk	turquoise
Pav_sc0001580.1_g240.1.br	blue
Pav_sc0000174.1_g1900.1.mk	purple
Pav_sc0000040.1_g340.1.mk	blue
Pav_sc0000800.1_g1490.1.mk	brown
Pav_sc0000907.1_g650.1.mk	brown
Pav_sc0000362.1_g080.1.mk	blue
novel.1056	blue
Pav_sc0002207.1_g100.1.mk	blue
Pav_sc0001932.1_g140.1.mk	magenta
Pav_sc0001485.1_g120.1.mk	turquoise
Pav_sc0000598.1_g550.1.mk	brown
Pav_sc0000754.1_g650.1.mk	brown
Pav_sc0001057.1_g140.1.br	magenta
Pav_sc0002206.1_g190.1.mk	brown
Pav_sc0000212.1_g420.1.mk	blue
Pav_sc0000583.1_g350.1.br	blue
Pav_sc0000099.1_g230.1.mk	brown
Pav_sc0000028.1_g940.1.mk	turquoise
Pav_sc0000138.1_g340.1.mk	turquoise
Pav_sc0002584.1_g150.1.mk	magenta
novel.692	blue
Pav_sc0000893.1_g1010.1.mk	turquoise
Pav_sc0000071.1_g860.1.mk	magenta
Pav_sc0000766.1_g240.1.mk	turquoise
novel.344	turquoise
Pav_sc0000671.1_g170.1.mk	brown
Pav_sc0001057.1_g490.1.br	red
Pav_sc0002475.1_g240.1.mk	blue
Pav_sc0000037.1_g170.1.mk	blue
Pav_sc0000848.1_g340.1.mk	magenta
Pav_sc0000877.1_g1320.1.mk	red
novel.1336	magenta
Pav_sc0000691.1_g190.1.mk	blue
Pav_sc0001377.1_g200.1.br	turquoise
Pav_sc0000568.1_g350.1.mk	brown
Pav_sc0001405.1_g520.1.mk	brown
Pav_sc0000311.1_g1160.1.mk	turquoise
Pav_sc0000009.1_g580.1.mk	blue
Pav_sc0000984.1_g090.1.br	blue
Pav_sc0000568.1_g780.1.br	brown
Pav_sc0000586.1_g550.1.mk	blue
Pav_sc0001369.1_g310.1.mk	turquoise
Pav_sc0000625.1_g340.1.mk	turquoise
Pav_sc0002445.1_g080.1.mk	blue
Pav_sc0000396.1_g390.1.mk	brown
Pav_sc0000084.1_g430.1.mk	blue
Pav_sc0000638.1_g470.1.br	brown
Pav_sc0002233.1_g100.1.mk	blue
Pav_sc0002099.1_g080.1.mk	turquoise
Pav_sc0000099.1_g090.1.mk	magenta
Pav_sc0000700.1_g230.1.mk	blue
Pav_sc0007703.1_g010.1.mk	brown
Pav_sc0000130.1_g780.1.mk	yellow
Pav_sc0000862.1_g100.1.mk	turquoise
Pav_sc0003802.1_g110.1.mk	blue
Pav_sc0000375.1_g050.1.mk	turquoise
Pav_sc0000544.1_g070.1.mk	black
Pav_sc0000711.1_g010.1.mk	blue
Pav_sc0000071.1_g750.1.mk	yellow
Pav_sc0000207.1_g1320.1.mk	red
Pav_sc0001258.1_g420.1.mk	red
Pav_sc0001169.1_g140.1.mk	blue
Pav_sc0008321.1_g010.1.mk	red
Pav_sc0000412.1_g230.1.mk	blue
Pav_sc0001925.1_g040.1.mk	green
Pav_sc0000598.1_g520.1.mk	brown
Pav_sc0001129.1_g070.1.mk	turquoise
Pav_sc0002214.1_g010.1.mk	brown
Pav_sc0008809.1_g010.1.mk	magenta
Pav_sc0000095.1_g1130.1.mk	turquoise
Pav_sc0004348.1_g080.1.mk	brown
Pav_sc0001582.1_g440.1.br	brown
novel.82	turquoise
Pav_sc0000829.1_g230.1.mk	blue
Pav_sc0001663.1_g030.1.mk	magenta
Pav_sc0003193.1_g020.1.br	magenta
Pav_sc0001102.1_g400.1.br	magenta
Pav_sc0001215.1_g200.1.mk	black
Pav_sc0000652.1_g400.1.mk	yellow
Pav_sc0000567.1_g1160.1.mk	blue
Pav_sc0004484.1_g080.1.br	turquoise
Pav_sc0000308.1_g120.1.br	blue
Pav_sc0000027.1_g160.1.br	blue
Pav_sc0000354.1_g460.1.mk	blue
Pav_sc0003135.1_g880.1.mk	yellow
Pav_sc0001405.1_g150.1.mk	blue
Pav_sc0000736.1_g390.1.mk	yellow
Pav_sc0000622.1_g920.1.mk	yellow
Pav_sc0000557.1_g140.1.mk	green
Pav_sc0000702.1_g090.1.mk	yellow
Pav_sc0000907.1_g640.1.mk	yellow
Pav_sc0000893.1_g090.1.mk	blue
Pav_sc0000983.1_g260.1.mk	blue
Pav_sc0000480.1_g980.1.br	blue
Pav_sc0003583.1_g070.1.br	turquoise
Pav_sc0000488.1_g330.1.mk	magenta
Pav_sc0000886.1_g110.1.mk	brown
Pav_sc0000652.1_g210.1.mk	blue
Pav_sc0000207.1_g1340.1.mk	turquoise
Pav_sc0000644.1_g080.1.mk	black
Pav_sc0001280.1_g430.1.mk	blue
Pav_sc0000085.1_g290.1.mk	blue
Pav_sc0000720.1_g080.1.mk	blue
Pav_sc0001009.1_g140.1.mk	turquoise
Pav_sc0000412.1_g240.1.mk	turquoise
Pav_sc0001539.1_g310.1.mk	yellow
Pav_sc0004901.1_g060.1.mk	turquoise
Pav_sc0000646.1_g030.1.mk	turquoise
Pav_sc0000745.1_g430.1.mk	yellow
Pav_sc0000254.1_g030.1.mk	black
Pav_sc0000488.1_g340.1.mk	blue
Pav_sc0002009.1_g350.1.mk	yellow
Pav_sc0001278.1_g120.1.br	turquoise
novel.575	brown
Pav_sc0000355.1_g370.1.mk	brown
Pav_sc0000449.1_g040.1.mk	turquoise
Pav_sc0000503.1_g360.1.mk	yellow
Pav_sc0000103.1_g660.1.mk	blue
Pav_sc0004405.1_g040.1.mk	yellow
Pav_sc0000065.1_g210.1.mk	turquoise
Pav_sc0000536.1_g030.1.mk	yellow
Pav_sc0000869.1_g500.1.mk	yellow
Pav_sc0000212.1_g1300.1.mk	brown
Pav_sc0000707.1_g040.1.mk	brown
Pav_sc0001015.1_g120.1.mk	brown
Pav_sc0000257.1_g1350.1.mk	turquoise
Pav_sc0000359.1_g040.1.mk	yellow
Pav_sc0001406.1_g060.1.br	turquoise
Pav_sc0002100.1_g110.1.mk	blue
Pav_sc0000054.1_g090.1.mk	turquoise
Pav_sc0002479.1_g520.1.br	turquoise
Pav_sc0000890.1_g1510.1.mk	yellow
Pav_sc0000071.1_g690.1.mk	yellow
Pav_sc0001242.1_g030.1.mk	brown
Pav_sc0000767.1_g130.1.mk	blue
Pav_sc0000675.1_g1150.1.mk	turquoise
Pav_sc0000590.1_g030.1.mk	blue
Pav_sc0004314.1_g040.1.mk	blue
Pav_sc0000396.1_g1070.1.mk	turquoise
Pav_sc0001027.1_g040.1.mk	turquoise
Pav_sc0001862.1_g310.1.mk	blue
Pav_sc0000129.1_g1150.1.br	blue
Pav_sc0001699.1_g680.1.mk	blue
Pav_sc0001860.1_g050.1.br	yellow
Pav_sc0000852.1_g440.1.mk	yellow
Pav_sc0000990.1_g070.1.mk	brown
Pav_sc0000042.1_g280.1.mk	blue
Pav_sc0001289.1_g270.1.mk	blue
Pav_co4022309.1_g010.1.mk	yellow
Pav_sc0000183.1_g310.1.mk	turquoise
Pav_sc0000598.1_g140.1.mk	yellow
Pav_sc0001925.1_g270.1.mk	blue
Pav_sc0001040.1_g260.1.mk	yellow
Pav_sc0009766.1_g010.1.mk	blue
Pav_sc0000608.1_g030.1.mk	turquoise
Pav_sc0002575.1_g080.1.mk	blue
novel.712	black
Pav_sc0001278.1_g130.1.mk	yellow
Pav_sc0000491.1_g610.1.mk	turquoise
Pav_sc0000095.1_g1110.1.mk	brown
Pav_sc0002584.1_g180.1.mk	turquoise
Pav_sc0001240.1_g060.1.mk	brown
Pav_sc0000348.1_g100.1.br	turquoise
Pav_sc0001461.1_g710.1.mk	blue
Pav_sc0000484.1_g710.1.mk	turquoise
Pav_sc0000910.1_g810.1.mk	turquoise
Pav_sc0000499.1_g160.1.mk	yellow
Pav_sc0000311.1_g1050.1.mk	turquoise
Pav_sc0000600.1_g970.1.mk	yellow
Pav_sc0004547.1_g060.1.br	blue
Pav_sc0005215.1_g010.1.mk	turquoise
Pav_sc0003094.1_g100.1.br	turquoise
Pav_sc0010540.1_g020.1.mk	yellow
Pav_sc0000998.1_g200.1.mk	blue
Pav_sc0008369.1_g030.1.br	magenta
Pav_sc0001205.1_g320.1.mk	blue
Pav_sc0001974.1_g130.1.mk	turquoise
Pav_sc0000095.1_g1340.1.mk	turquoise
Pav_sc0000354.1_g520.1.mk	turquoise
Pav_sc0001102.1_g500.1.mk	yellow
Pav_sc0000491.1_g220.1.mk	turquoise
Pav_sc0000323.1_g360.1.mk	yellow
Pav_sc0000269.1_g440.1.mk	brown
Pav_sc0001405.1_g1300.1.mk	blue
Pav_sc0001112.1_g070.1.mk	turquoise
Pav_sc0000749.1_g170.1.mk	turquoise
Pav_sc0001749.1_g180.1.mk	turquoise
Pav_sc0000069.1_g330.1.mk	black
Pav_sc0004670.1_g010.1.mk	yellow
Pav_sc0001102.1_g510.1.mk	black
Pav_co4017443.1_g010.1.mk	turquoise
Pav_sc0000095.1_g790.1.mk	turquoise
Pav_sc0005984.1_g050.1.mk	blue
Pav_sc0000129.1_g1170.1.br	green
Pav_sc0001583.1_g270.1.br	turquoise
Pav_sc0001031.1_g300.1.br	blue
Pav_sc0000220.1_g180.1.mk	yellow
Pav_sc0000848.1_g040.1.mk	turquoise
Pav_sc0000129.1_g1230.1.mk	turquoise
Pav_sc0000428.1_g520.1.mk	yellow
Pav_sc0000747.1_g030.1.mk	brown
Pav_sc0000491.1_g1290.1.mk	blue
Pav_sc0000563.1_g270.1.mk	purple
Pav_sc0002433.1_g070.1.mk	blue
Pav_sc0000671.1_g230.1.mk	turquoise
Pav_sc0000675.1_g700.1.br	turquoise
Pav_sc0001242.1_g310.1.mk	blue
Pav_sc0000052.1_g450.1.br	yellow
novel.33	blue
Pav_sc0000567.1_g950.1.mk	red
Pav_sc0000813.1_g390.1.mk	turquoise
Pav_sc0001175.1_g250.1.mk	turquoise
Pav_co4048787.1_g010.1.mk	turquoise
Pav_sc0002342.1_g060.1.br	blue
Pav_sc0000244.1_g070.1.mk	turquoise
Pav_sc0001196.1_g920.1.br	turquoise
Pav_sc0000129.1_g1610.1.mk	brown
Pav_sc0000481.1_g340.1.mk	brown
novel.136	turquoise
Pav_sc0000093.1_g660.1.mk	blue
Pav_sc0003279.1_g030.1.mk	turquoise
Pav_sc0001953.1_g030.1.mk	brown
Pav_sc0006872.1_g010.1.br	turquoise
Pav_sc0001724.1_g050.1.mk	blue
Pav_sc0000093.1_g600.1.mk	blue
Pav_sc0000030.1_g530.1.br	turquoise
Pav_sc0004467.1_g060.1.mk	blue
Pav_sc0001405.1_g1990.1.mk	turquoise
Pav_sc0000055.1_g350.1.mk	blue
Pav_sc0000700.1_g1880.1.mk	blue
Pav_sc0001502.1_g260.1.br	blue
Pav_sc0000554.1_g630.1.mk	red
Pav_sc0000071.1_g810.1.mk	red
Pav_sc0000254.1_g1300.1.mk	blue
Pav_sc0000877.1_g1490.1.mk	turquoise
Pav_sc0001309.1_g1270.1.mk	pink
Pav_sc0000375.1_g110.1.mk	turquoise
Pav_sc0000412.1_g190.1.mk	green
Pav_sc0000622.1_g720.1.mk	turquoise
Pav_sc0000009.1_g020.1.mk	turquoise
Pav_sc0002327.1_g570.1.mk	turquoise
Pav_sc0000652.1_g760.1.mk	green
Pav_sc0001205.1_g010.1.mk	turquoise
Pav_sc0000700.1_g720.1.mk	pink
Pav_sc0000244.1_g050.1.mk	turquoise
Pav_sc0001196.1_g980.1.mk	turquoise
Pav_sc0000467.1_g030.1.mk	turquoise
Pav_sc0000449.1_g530.1.mk	turquoise
Pav_sc0001027.1_g090.1.mk	blue
Pav_sc0000780.1_g130.1.br	turquoise
Pav_sc0000567.1_g1080.1.mk	turquoise
Pav_sc0000649.1_g120.1.mk	turquoise
Pav_sc0002286.1_g070.1.mk	turquoise
Pav_sc0001954.1_g130.1.mk	turquoise
Pav_sc0003835.1_g260.1.mk	turquoise
Pav_sc0000028.1_g090.1.mk	turquoise
Pav_sc0002360.1_g700.1.mk	brown
Pav_sc0000251.1_g110.1.mk	turquoise
Pav_sc0000051.1_g290.1.mk	brown
Pav_co4008389.1_g010.1.mk	blue
Pav_sc0000543.1_g420.1.mk	turquoise
Pav_sc0000119.1_g430.1.mk	turquoise
Pav_sc0000113.1_g370.1.mk	turquoise
Pav_sc0001280.1_g170.1.br	turquoise
Pav_sc0000464.1_g540.1.mk	turquoise
Pav_sc0001289.1_g500.1.mk	turquoise
Pav_sc0003169.1_g240.1.mk	turquoise
Pav_sc0000072.1_g230.1.mk	turquoise
Pav_sc0002327.1_g970.1.mk	turquoise
Pav_sc0000071.1_g530.1.mk	brown
Pav_sc0001102.1_g800.1.mk	brown
Pav_sc0000251.1_g140.1.br	turquoise
novel.1160	turquoise
Pav_sc0001215.1_g090.1.mk	turquoise
Pav_sc0000525.1_g510.1.mk	turquoise
Pav_sc0003835.1_g230.1.mk	brown
Pav_sc0001786.1_g160.1.mk	blue
Pav_sc0006018.1_g250.1.mk	blue
Pav_sc0000428.1_g830.1.mk	turquoise
Pav_sc0000027.1_g410.1.br	turquoise
Pav_sc0001900.1_g290.1.mk	turquoise
Pav_sc0000704.1_g900.1.mk	blue
Pav_sc0000824.1_g060.1.mk	brown
Pav_sc0002264.1_g300.1.mk	brown
Pav_sc0000069.1_g310.1.mk	red
Pav_sc0001305.1_g740.1.mk	turquoise
Pav_sc0001345.1_g280.1.mk	turquoise
Pav_sc0000174.1_g1970.1.mk	brown
Pav_sc0006576.1_g010.1.mk	turquoise
Pav_sc0001080.1_g590.1.mk	turquoise
Pav_sc0002388.1_g080.1.mk	turquoise
Pav_sc0000555.1_g310.1.mk	pink
Pav_sc0000030.1_g120.1.mk	blue
Pav_co4022557.1_g010.1.br	turquoise
Pav_sc0000095.1_g450.1.mk	turquoise
Pav_sc0000027.1_g040.1.mk	turquoise
Pav_sc0002009.1_g170.1.mk	turquoise
Pav_sc0000195.1_g130.1.mk	turquoise
Pav_sc0000893.1_g500.1.mk	turquoise
Pav_sc0000243.1_g340.1.mk	turquoise
Pav_sc0001020.1_g160.1.mk	turquoise
Pav_sc0000556.1_g110.1.mk	yellow
novel.1010	turquoise
Pav_sc0000216.1_g030.1.mk	turquoise
Pav_sc0002360.1_g950.1.mk	turquoise
Pav_sc0000254.1_g1080.1.br	brown
Pav_sc0006048.1_g080.1.mk	brown
Pav_sc0000103.1_g1860.1.mk	turquoise
Pav_sc0001309.1_g770.1.mk	turquoise
Pav_sc0000293.1_g420.1.mk	turquoise
Pav_sc0000691.1_g710.1.mk	turquoise
Pav_sc0000893.1_g780.1.mk	turquoise
Pav_sc0005028.1_g040.1.mk	turquoise
Pav_sc0000652.1_g350.1.mk	turquoise
Pav_sc0000843.1_g460.1.mk	turquoise
Pav_sc0010284.1_g010.1.mk	turquoise
Pav_sc0000890.1_g1330.1.mk	turquoise
Pav_sc0001982.1_g030.1.br	turquoise
Pav_sc0002230.1_g130.1.br	turquoise
Pav_sc0001341.1_g540.1.mk	turquoise
Pav_sc0002360.1_g140.1.mk	blue
Pav_sc0001582.1_g280.1.mk	turquoise
Pav_sc0001938.1_g190.1.mk	blue
Pav_sc0000773.1_g090.1.mk	turquoise
Pav_sc0001080.1_g580.1.mk	turquoise
Pav_sc0000893.1_g550.1.mk	yellow
Pav_sc0000535.1_g300.1.mk	turquoise
Pav_sc0007209.1_g120.1.mk	turquoise
Pav_sc0004531.1_g040.1.mk	turquoise
Pav_sc0001077.1_g010.1.mk	purple
Pav_sc0000624.1_g1300.1.mk	turquoise
Pav_sc0001243.1_g220.1.mk	turquoise
Pav_sc0000027.1_g320.1.mk	green
Pav_sc0000375.1_g100.1.mk	turquoise
Pav_sc0000354.1_g310.1.mk	blue
novel.859	turquoise
Pav_sc0000909.1_g500.1.mk	turquoise
Pav_sc0005664.1_g130.1.mk	turquoise
Pav_sc0001405.1_g420.1.mk	turquoise
novel.837	turquoise
Pav_sc0000108.1_g1020.1.mk	turquoise
Pav_sc0000164.1_g200.1.br	turquoise
Pav_sc0000138.1_g790.1.mk	turquoise
Pav_sc0000212.1_g310.1.mk	black
Pav_sc0001296.1_g330.1.mk	turquoise
Pav_sc0001196.1_g1000.1.mk	turquoise
Pav_sc0000440.1_g280.1.mk	turquoise
Pav_co4005891.1_g010.1.mk	turquoise
Pav_sc0000028.1_g570.1.mk	turquoise
Pav_sc0000396.1_g1080.1.mk	turquoise
Pav_sc0001476.1_g160.1.mk	turquoise
Pav_sc0000376.1_g390.1.mk	turquoise
Pav_sc0003135.1_g120.1.mk	turquoise
Pav_sc0000414.1_g010.1.mk	turquoise
Pav_sc0007033.1_g040.1.mk	black
Pav_sc0000308.1_g610.1.mk	yellow
Pav_sc0000052.1_g290.1.mk	turquoise
Pav_sc0000893.1_g290.1.mk	turquoise
Pav_sc0003614.1_g100.1.mk	turquoise
Pav_sc0000138.1_g1040.1.mk	blue
Pav_sc0000681.1_g020.1.br	turquoise
Pav_sc0000449.1_g540.1.mk	turquoise
Pav_sc0001825.1_g250.1.mk	turquoise
Pav_sc0000491.1_g620.1.mk	green
Pav_sc0000410.1_g630.1.mk	turquoise
Pav_sc0001862.1_g300.1.mk	blue
Pav_sc0000744.1_g060.1.mk	turquoise
Pav_sc0000554.1_g2270.1.mk	turquoise
Pav_sc0001695.1_g280.1.mk	black
Pav_sc0003614.1_g330.1.mk	turquoise
Pav_sc0001205.1_g330.1.mk	grey
Pav_sc0000129.1_g220.1.mk	turquoise
Pav_sc0000872.1_g110.1.mk	red
Pav_sc0001701.1_g020.1.mk	turquoise
Pav_sc0000428.1_g690.1.mk	turquoise
Pav_sc0004356.1_g050.1.mk	turquoise
Pav_sc0000064.1_g080.1.mk	turquoise
Pav_sc0000084.1_g560.1.mk	turquoise
Pav_sc0000852.1_g400.1.mk	black
Pav_sc0000017.1_g860.1.mk	turquoise
Pav_sc0000257.1_g890.1.mk	blue
Pav_sc0000675.1_g260.1.mk	blue
Pav_sc0001163.1_g090.1.mk	red
Pav_sc0001129.1_g120.1.mk	turquoise
Pav_sc0000071.1_g490.1.mk	turquoise
Pav_sc0001900.1_g300.1.mk	turquoise
Pav_sc0001807.1_g070.1.mk	turquoise
Pav_sc0001196.1_g1020.1.mk	turquoise
Pav_sc0002544.1_g080.1.mk	turquoise
Pav_sc0000675.1_g720.1.mk	turquoise
Pav_sc0001205.1_g090.1.mk	yellow
Pav_sc0000700.1_g080.1.mk	brown
Pav_sc0000740.1_g230.1.mk	blue
Pav_sc0000600.1_g380.1.mk	turquoise
Pav_sc0001663.1_g300.1.br	red
Pav_sc0000620.1_g060.1.br	turquoise
novel.482	turquoise
Pav_sc0006018.1_g310.1.mk	turquoise
Pav_sc0001289.1_g290.1.br	turquoise
Pav_sc0000588.1_g740.1.mk	turquoise
Pav_sc0000119.1_g330.1.mk	red
Pav_sc0005810.1_g020.1.mk	blue
Pav_sc0000042.1_g380.1.mk	turquoise
Pav_sc0000869.1_g580.1.br	turquoise
Pav_sc0000220.1_g380.1.mk	brown
Pav_sc0000349.1_g230.1.br	green
Pav_sc0002828.1_g060.1.mk	yellow
Pav_sc0000216.1_g1190.1.mk	turquoise
Pav_sc0001695.1_g220.1.mk	turquoise
Pav_sc0000009.1_g410.1.mk	turquoise
Pav_sc0000747.1_g580.1.mk	turquoise
Pav_sc0000845.1_g230.1.mk	turquoise
Pav_sc0000357.1_g070.1.mk	turquoise
Pav_sc0001663.1_g370.1.mk	red
Pav_sc0000375.1_g500.1.mk	turquoise
Pav_sc0003562.1_g030.1.mk	blue
Pav_sc0001126.1_g220.1.br	turquoise
Pav_sc0002250.1_g180.1.mk	turquoise
Pav_sc0000044.1_g420.1.mk	turquoise
Pav_sc0002327.1_g690.1.mk	turquoise
Pav_sc0001405.1_g1930.1.mk	turquoise
Pav_sc0000091.1_g560.1.mk	black
Pav_sc0010595.1_g010.1.mk	brown
Pav_sc0000893.1_g1030.1.mk	turquoise
Pav_sc0004637.1_g030.1.mk	turquoise
Pav_sc0000488.1_g610.1.mk	turquoise
Pav_sc0000212.1_g1050.1.mk	turquoise
Pav_sc0000652.1_g1030.1.mk	turquoise
Pav_sc0004026.1_g030.1.mk	blue
Pav_sc0000843.1_g1030.1.br	turquoise
Pav_sc0000683.1_g150.1.mk	blue
Pav_sc0002206.1_g310.1.mk	black
Pav_sc0000675.1_g680.1.br	turquoise
Pav_sc0000852.1_g510.1.mk	brown
Pav_sc0000557.1_g130.1.mk	blue
Pav_co4088907.1_g010.1.mk	turquoise
Pav_sc0001392.1_g560.1.mk	turquoise
Pav_sc0000491.1_g770.1.mk	blue
Pav_sc0000586.1_g170.1.mk	turquoise
Pav_sc0000449.1_g500.1.mk	turquoise
Pav_sc0000848.1_g200.1.mk	turquoise
Pav_sc0006018.1_g290.1.mk	turquoise
Pav_sc0002430.1_g020.1.mk	turquoise
Pav_sc0001335.1_g250.1.mk	turquoise
Pav_sc0000886.1_g090.1.mk	turquoise
Pav_sc0000195.1_g800.1.mk	turquoise
Pav_sc0001112.1_g080.1.br	turquoise
Pav_sc0000212.1_g1020.1.mk	turquoise
Pav_sc0001877.1_g160.1.mk	turquoise
Pav_sc0000557.1_g1040.1.mk	turquoise
novel.1264	magenta
Pav_sc0000212.1_g1700.1.mk	turquoise
Pav_sc0000675.1_g910.1.mk	turquoise
Pav_sc0001046.1_g470.1.mk	turquoise
Pav_sc0000638.1_g680.1.mk	turquoise
Pav_sc0000500.1_g170.1.mk	brown
Pav_sc0000095.1_g1330.1.mk	turquoise
Pav_sc0000558.1_g090.1.mk	brown
Pav_sc0000212.1_g080.1.br	blue
Pav_sc0005678.1_g120.1.mk	turquoise
Pav_sc0000752.1_g170.1.br	turquoise
Pav_sc0000744.1_g400.1.mk	turquoise
Pav_sc0000852.1_g940.1.mk	turquoise
Pav_sc0000138.1_g980.1.mk	brown
Pav_sc0001280.1_g650.1.mk	turquoise
Pav_sc0008903.1_g030.1.mk	blue
Pav_sc0000890.1_g1300.1.mk	turquoise
Pav_sc0010552.1_g010.1.mk	turquoise
Pav_sc0000877.1_g1770.1.mk	green
Pav_sc0001479.1_g140.1.mk	turquoise
Pav_sc0001580.1_g140.1.mk	turquoise
Pav_sc0000260.1_g250.1.mk	brown
Pav_sc0003759.1_g060.1.mk	turquoise
Pav_sc0000037.1_g420.1.mk	brown
Pav_sc0001339.1_g170.1.mk	black
novel.621	green
Pav_sc0001280.1_g010.1.mk	turquoise
Pav_sc0006098.1_g170.1.mk	turquoise
Pav_sc0003845.1_g140.1.mk	red
Pav_sc0000855.1_g030.1.mk	turquoise
Pav_sc0000554.1_g050.1.br	red
Pav_sc0000545.1_g190.1.br	turquoise
Pav_sc0002360.1_g600.1.mk	blue
Pav_sc0000721.1_g240.1.mk	turquoise
Pav_sc0000886.1_g240.1.mk	turquoise
Pav_sc0002456.1_g260.1.mk	turquoise
Pav_sc0000983.1_g450.1.mk	turquoise
Pav_sc0001859.1_g370.1.br	turquoise
Pav_sc0000589.1_g290.1.mk	turquoise
Pav_sc0000410.1_g510.1.mk	turquoise
Pav_sc0000467.1_g120.1.mk	red
Pav_sc0001411.1_g550.1.mk	turquoise
Pav_sc0000554.1_g060.1.mk	brown
Pav_sc0002009.1_g310.1.mk	turquoise
Pav_sc0000877.1_g070.1.mk	blue
Pav_sc0000103.1_g1530.1.mk	turquoise
Pav_sc0001710.1_g1460.1.mk	turquoise
Pav_sc0000467.1_g100.1.mk	blue
Pav_sc0001963.1_g520.1.mk	red
Pav_sc0000591.1_g330.1.mk	turquoise
Pav_sc0001488.1_g010.1.br	turquoise
Pav_sc0000257.1_g150.1.mk	brown
Pav_sc0000138.1_g830.1.br	turquoise
Pav_sc0004923.1_g040.1.mk	turquoise
Pav_sc0000491.1_g990.1.mk	blue
Pav_sc0000212.1_g1600.1.mk	turquoise
Pav_sc0000257.1_g100.1.mk	black
novel.183	turquoise
Pav_sc0003135.1_g440.1.mk	turquoise
Pav_sc0002479.1_g700.1.mk	turquoise
Pav_sc0001405.1_g1060.1.mk	pink
Pav_sc0000370.1_g280.1.mk	blue
Pav_sc0001102.1_g820.1.mk	turquoise
Pav_sc0004354.1_g060.1.mk	red
Pav_sc0001335.1_g670.1.mk	turquoise
Pav_sc0000176.1_g190.1.mk	turquoise
Pav_sc0001020.1_g150.1.mk	brown
Pav_sc0006132.1_g030.1.mk	turquoise
Pav_sc0003174.1_g070.1.mk	blue
Pav_sc0000563.1_g010.1.mk	turquoise
Pav_sc0005215.1_g030.1.mk	turquoise
Pav_sc0001181.1_g790.1.mk	brown
Pav_sc0000440.1_g180.1.mk	brown
Pav_sc0002842.1_g320.1.mk	turquoise
Pav_sc0007323.1_g020.1.br	turquoise
Pav_sc0000755.1_g420.1.mk	black
Pav_sc0000157.1_g310.1.br	turquoise
Pav_sc0000045.1_g070.1.mk	turquoise
Pav_sc0003135.1_g050.1.mk	turquoise
Pav_sc0000311.1_g530.1.mk	brown
Pav_sc0006850.1_g030.1.mk	turquoise
Pav_sc0000099.1_g890.1.mk	red
Pav_sc0000257.1_g140.1.mk	brown
Pav_sc0000464.1_g390.1.mk	turquoise
Pav_sc0000062.1_g510.1.mk	yellow
Pav_sc0000484.1_g580.1.mk	turquoise
novel.1129	green
Pav_sc0003584.1_g050.1.br	turquoise
Pav_sc0000065.1_g260.1.mk	turquoise
Pav_sc0000648.1_g230.1.mk	turquoise
Pav_sc0001576.1_g170.1.mk	turquoise
Pav_sc0002360.1_g930.1.mk	turquoise
Pav_sc0002195.1_g050.1.mk	turquoise
Pav_sc0001142.1_g010.1.mk	brown
Pav_sc0000044.1_g330.1.mk	turquoise
Pav_sc0000567.1_g720.1.mk	brown
Pav_sc0002360.1_g070.1.mk	turquoise
Pav_sc0001309.1_g410.1.mk	turquoise
Pav_sc0001309.1_g1060.1.mk	blue
Pav_sc0000910.1_g100.1.mk	turquoise
Pav_sc0000055.1_g090.1.mk	brown
Pav_sc0000029.1_g180.1.mk	turquoise
Pav_sc0000600.1_g350.1.mk	turquoise
Pav_sc0000370.1_g560.1.mk	turquoise
Pav_sc0000549.1_g1100.1.mk	turquoise
Pav_sc0001080.1_g950.1.mk	turquoise
Pav_sc0002181.1_g090.1.mk	brown
Pav_sc0000886.1_g420.1.mk	turquoise
Pav_sc0001059.1_g180.1.mk	brown
Pav_sc0001836.1_g130.1.br	turquoise
Pav_sc0000624.1_g1890.1.mk	blue
Pav_sc0002234.1_g060.1.mk	turquoise
Pav_sc0000130.1_g200.1.mk	turquoise
Pav_sc0002839.1_g450.1.mk	red
Pav_sc0001364.1_g050.1.mk	brown
Pav_sc0000622.1_g190.1.br	turquoise
Pav_sc0000085.1_g340.1.mk	turquoise
Pav_sc0000890.1_g1470.1.mk	turquoise
novel.75	turquoise
Pav_sc0000099.1_g700.1.mk	turquoise
Pav_sc0000084.1_g450.1.mk	yellow
Pav_sc0001205.1_g420.1.mk	blue
Pav_sc0000713.1_g430.1.mk	turquoise
Pav_sc0000271.1_g100.1.mk	turquoise
Pav_sc0001227.1_g020.1.mk	turquoise
Pav_sc0006281.1_g050.1.mk	yellow
Pav_sc0001543.1_g160.1.br	turquoise
novel.999	red
Pav_sc0001963.1_g630.1.mk	red
Pav_sc0000157.1_g080.1.mk	turquoise
Pav_sc0000383.1_g160.1.mk	turquoise
Pav_sc0011764.1_g010.1.mk	turquoise
Pav_sc0000206.1_g490.1.mk	turquoise
Pav_sc0001196.1_g080.1.mk	turquoise
Pav_sc0000040.1_g350.1.mk	turquoise
Pav_sc0004735.1_g140.1.mk	blue
Pav_sc0000464.1_g690.1.mk	turquoise
Pav_co4045625.1_g010.1.mk	turquoise
Pav_sc0000493.1_g060.1.mk	turquoise
Pav_sc0003138.1_g040.1.mk	turquoise
Pav_sc0000981.1_g210.1.mk	turquoise
Pav_sc0000142.1_g090.1.mk	brown
Pav_sc0000912.1_g070.1.mk	blue
Pav_sc0002360.1_g1010.1.br	turquoise
Pav_sc0000175.1_g160.1.mk	turquoise
Pav_sc0001217.1_g200.1.mk	turquoise
Pav_sc0000370.1_g260.1.mk	turquoise
Pav_sc0000220.1_g1030.1.mk	turquoise
Pav_sc0000029.1_g160.1.mk	yellow
Pav_sc0001080.1_g870.1.mk	turquoise
Pav_sc0000554.1_g1550.1.mk	turquoise
Pav_sc0001503.1_g220.1.mk	turquoise
Pav_sc0000464.1_g910.1.mk	turquoise
Pav_sc0002772.1_g130.1.mk	blue
Pav_sc0000600.1_g090.1.mk	turquoise
Pav_sc0001502.1_g480.1.mk	turquoise
Pav_sc0001582.1_g250.1.mk	turquoise
Pav_sc0000130.1_g270.1.mk	turquoise
Pav_sc0004835.1_g020.1.mk	red
Pav_sc0000009.1_g1100.1.mk	turquoise
Pav_sc0000998.1_g060.1.mk	turquoise
Pav_sc0000095.1_g1700.1.mk	turquoise
Pav_sc0000220.1_g360.1.mk	turquoise
Pav_sc0001932.1_g110.1.mk	turquoise
Pav_sc0001102.1_g1030.1.mk	yellow
Pav_sc0002342.1_g030.1.br	turquoise
Pav_sc0000243.1_g080.1.mk	brown
Pav_sc0000247.1_g090.1.mk	blue
Pav_sc0009104.1_g010.1.mk	blue
Pav_sc0002835.1_g130.1.mk	turquoise
Pav_sc0000311.1_g260.1.mk	blue
Pav_sc0001794.1_g010.1.mk	turquoise
Pav_sc0002319.1_g030.1.mk	turquoise
Pav_sc0000589.1_g130.1.mk	turquoise
Pav_sc0000027.1_g120.1.mk	turquoise
Pav_sc0000212.1_g1010.1.mk	turquoise
Pav_sc0001825.1_g230.1.mk	turquoise
Pav_sc0000467.1_g1080.1.mk	turquoise
Pav_sc0000030.1_g540.1.br	turquoise
Pav_sc0003532.1_g010.1.mk	turquoise
novel.347	turquoise
Pav_sc0001413.1_g350.1.mk	blue
Pav_sc0000847.1_g070.1.mk	turquoise
Pav_sc0002337.1_g030.1.br	turquoise
Pav_sc0000174.1_g710.1.mk	turquoise
Pav_sc0000554.1_g040.1.br	turquoise
Pav_sc0000130.1_g230.1.mk	turquoise
Pav_sc0000311.1_g970.1.mk	turquoise
Pav_sc0000484.1_g500.1.mk	green
Pav_sc0001183.1_g410.1.mk	turquoise
Pav_sc0001272.1_g030.1.mk	turquoise
Pav_sc0000848.1_g740.1.mk	turquoise
Pav_sc0000888.1_g040.1.mk	brown
Pav_sc0001944.1_g040.1.mk	turquoise
Pav_sc0002208.1_g240.1.mk	turquoise
Pav_sc0002607.1_g140.1.mk	turquoise
Pav_sc0000978.1_g020.1.mk	turquoise
Pav_sc0001015.1_g310.1.mk	turquoise
Pav_sc0003614.1_g350.1.mk	turquoise
Pav_sc0000028.1_g330.1.br	brown
Pav_sc0000669.1_g040.1.br	turquoise
Pav_sc0000588.1_g160.1.mk	turquoise
Pav_sc0002998.1_g040.1.mk	turquoise
Pav_sc0001503.1_g060.1.br	turquoise
Pav_sc0000370.1_g080.1.mk	blue
Pav_sc0001309.1_g160.1.mk	black
Pav_sc0000087.1_g510.1.mk	turquoise
Pav_sc0000220.1_g280.1.mk	green
Pav_sc0002986.1_g210.1.mk	turquoise
Pav_sc0001932.1_g160.1.mk	turquoise
Pav_sc0000091.1_g170.1.mk	turquoise
Pav_sc0000912.1_g190.1.mk	turquoise
Pav_sc0000909.1_g330.1.mk	turquoise
Pav_sc0001341.1_g100.1.mk	turquoise
Pav_co4031697.1_g010.1.mk	red
Pav_sc0001109.1_g040.1.mk	turquoise
Pav_sc0000975.1_g120.1.mk	turquoise
Pav_sc0000890.1_g500.1.mk	turquoise
novel.823	blue
Pav_sc0000174.1_g1960.1.mk	brown
Pav_sc0000052.1_g680.1.mk	blue
Pav_sc0000065.1_g590.1.mk	turquoise
Pav_sc0001502.1_g490.1.mk	turquoise
Pav_sc0001341.1_g370.1.mk	turquoise
Pav_sc0001061.1_g030.1.mk	turquoise
Pav_sc0000212.1_g1070.1.mk	turquoise
Pav_sc0000480.1_g460.1.mk	turquoise
Pav_sc0001431.1_g030.1.mk	turquoise
Pav_sc0001740.1_g160.1.mk	turquoise
Pav_sc0000800.1_g320.1.mk	turquoise
Pav_sc0001695.1_g210.1.br	turquoise
Pav_sc0000254.1_g1110.1.mk	turquoise
Pav_sc0000069.1_g160.1.mk	turquoise
Pav_sc0000721.1_g250.1.mk	turquoise
Pav_sc0000514.1_g310.1.mk	turquoise
Pav_sc0002024.1_g170.1.mk	green
Pav_sc0002449.1_g060.1.mk	turquoise
Pav_sc0000257.1_g570.1.mk	black
Pav_sc0000751.1_g130.1.mk	turquoise
Pav_sc0000220.1_g790.1.mk	turquoise
Pav_sc0000979.1_g110.1.mk	turquoise
Pav_sc0002479.1_g170.1.br	turquoise
Pav_sc0001392.1_g520.1.mk	turquoise
Pav_sc0000497.1_g270.1.mk	turquoise
Pav_sc0000597.1_g050.1.mk	turquoise
Pav_sc0000251.1_g130.1.br	turquoise
novel.598	turquoise
Pav_sc0000009.1_g530.1.mk	turquoise
Pav_sc0000955.1_g010.1.mk	turquoise
Pav_sc0000023.1_g530.1.mk	green
Pav_sc0000103.1_g580.1.mk	turquoise
Pav_sc0001084.1_g400.1.mk	turquoise
Pav_sc0002208.1_g610.1.mk	brown
Pav_sc0000428.1_g330.1.mk	turquoise
Pav_sc0000370.1_g830.1.mk	turquoise
Pav_sc0000691.1_g780.1.br	turquoise
Pav_sc0007634.1_g010.1.mk	turquoise
Pav_sc0000012.1_g020.1.br	turquoise
Pav_sc0000355.1_g130.1.mk	turquoise
Pav_sc0000652.1_g1020.1.mk	yellow
Pav_sc0000254.1_g520.1.mk	blue
Pav_sc0000691.1_g770.1.br	turquoise
Pav_sc0002234.1_g170.1.mk	turquoise
Pav_sc0000212.1_g1190.1.mk	turquoise
Pav_sc0000370.1_g750.1.mk	blue
Pav_sc0002842.1_g240.1.mk	blue
Pav_sc0001009.1_g500.1.mk	turquoise
Pav_sc0002835.1_g140.1.mk	turquoise
Pav_sc0000983.1_g240.1.mk	turquoise
Pav_sc0005529.1_g010.1.br	turquoise
Pav_sc0002318.1_g040.1.mk	turquoise
Pav_sc0012332.1_g010.1.br	turquoise
Pav_sc0002722.1_g050.1.mk	pink
Pav_sc0002327.1_g580.1.mk	turquoise
Pav_sc0005678.1_g020.1.mk	turquoise
Pav_sc0000381.1_g160.1.mk	turquoise
Pav_sc0000493.1_g120.1.mk	turquoise
Pav_sc0000212.1_g1130.1.mk	yellow
Pav_sc0000229.1_g120.1.mk	turquoise
Pav_sc0000598.1_g540.1.mk	turquoise
Pav_sc0000843.1_g520.1.mk	blue
Pav_sc0000370.1_g370.1.mk	turquoise
Pav_sc0000184.1_g020.1.mk	turquoise
Pav_sc0000467.1_g270.1.mk	brown
Pav_sc0000661.1_g470.1.mk	blue
Pav_sc0001405.1_g1540.1.mk	turquoise
Pav_sc0000863.1_g670.1.mk	red
Pav_sc0000732.1_g070.1.mk	turquoise
Pav_sc0000212.1_g810.1.mk	turquoise
Pav_sc0000484.1_g490.1.mk	yellow
Pav_sc0001529.1_g170.1.mk	turquoise
Pav_sc0000205.1_g330.1.mk	turquoise
Pav_sc0000176.1_g080.1.mk	turquoise
Pav_sc0001878.1_g250.1.mk	turquoise
Pav_sc0001124.1_g410.1.mk	turquoise
Pav_sc0000597.1_g270.1.mk	turquoise
Pav_sc0000362.1_g120.1.mk	yellow
novel.523	turquoise
Pav_sc0000257.1_g860.1.mk	turquoise
Pav_sc0000129.1_g1670.1.mk	blue
novel.1179	magenta
Pav_sc0000683.1_g050.1.mk	turquoise
Pav_sc0000977.1_g410.1.mk	turquoise
Pav_sc0001015.1_g180.1.mk	turquoise
Pav_sc0000598.1_g020.1.br	blue
Pav_sc0001859.1_g260.1.br	turquoise
Pav_sc0001990.1_g140.1.mk	blue
Pav_sc0000760.1_g010.1.mk	turquoise
Pav_sc0000108.1_g280.1.mk	turquoise
Pav_sc0000557.1_g340.1.mk	turquoise
Pav_sc0000491.1_g650.1.mk	blue
Pav_sc0002360.1_g820.1.mk	turquoise
Pav_sc0000700.1_g1340.1.mk	blue
Pav_sc0001275.1_g650.1.mk	green
Pav_sc0005028.1_g080.1.br	grey
novel.696	turquoise
novel.1219	turquoise
Pav_sc0000638.1_g500.1.mk	turquoise
Pav_sc0001309.1_g1380.1.mk	blue
Pav_sc0001305.1_g020.1.mk	turquoise
Pav_sc0000375.1_g070.1.mk	red
Pav_sc0000905.1_g110.1.br	turquoise
Pav_sc0000023.1_g160.1.mk	brown
Pav_sc0001289.1_g490.1.mk	turquoise
novel.603	turquoise
Pav_sc0000195.1_g690.1.mk	turquoise
novel.843	turquoise
Pav_sc0000464.1_g670.1.mk	brown
Pav_sc0001932.1_g100.1.mk	turquoise
Pav_sc0000044.1_g040.1.mk	turquoise
Pav_sc0000767.1_g100.1.br	turquoise
Pav_sc0002493.1_g090.1.mk	magenta
Pav_sc0001872.1_g160.1.mk	turquoise
Pav_sc0005746.1_g110.1.mk	turquoise
Pav_sc0001323.1_g1000.1.mk	turquoise
Pav_sc0001289.1_g120.1.mk	turquoise
Pav_sc0003562.1_g370.1.mk	turquoise
Pav_sc0000359.1_g730.1.br	turquoise
Pav_sc0002181.1_g330.1.mk	turquoise
Pav_sc0000044.1_g340.1.mk	turquoise
Pav_sc0001405.1_g1920.1.mk	turquoise
Pav_sc0001397.1_g010.1.mk	turquoise
Pav_sc0002858.1_g300.1.mk	turquoise
Pav_sc0000220.1_g260.1.mk	turquoise
Pav_sc0003618.1_g030.1.mk	turquoise
Pav_sc0000648.1_g510.1.br	turquoise
Pav_sc0000194.1_g150.1.mk	turquoise
Pav_sc0000454.1_g150.1.mk	turquoise
Pav_sc0000131.1_g520.1.br	turquoise
Pav_sc0001217.1_g030.1.mk	turquoise
Pav_sc0000084.1_g520.1.mk	turquoise
Pav_sc0001502.1_g030.1.mk	turquoise
Pav_sc0003135.1_g860.1.mk	turquoise
Pav_sc0000103.1_g970.1.mk	turquoise
Pav_sc0000414.1_g210.1.br	turquoise
Pav_sc0000431.1_g240.1.mk	turquoise
Pav_sc0001405.1_g1910.1.mk	turquoise
Pav_sc0000359.1_g100.1.mk	turquoise
Pav_sc0000377.1_g340.1.mk	pink
Pav_sc0000652.1_g1140.1.mk	turquoise
Pav_sc0011762.1_g010.1.mk	green
Pav_sc0000749.1_g150.1.mk	turquoise
novel.1104	blue
Pav_sc0000323.1_g500.1.mk	turquoise
Pav_sc0002230.1_g070.1.mk	turquoise
Pav_sc0004303.1_g150.1.mk	turquoise
Pav_sc0000084.1_g790.1.mk	turquoise
Pav_sc0000257.1_g160.1.mk	blue
Pav_sc0001911.1_g560.1.mk	turquoise
Pav_sc0000652.1_g990.1.mk	blue
Pav_sc0000112.1_g140.1.mk	turquoise
Pav_sc0000164.1_g210.1.mk	turquoise
Pav_sc0000467.1_g940.1.mk	turquoise
Pav_co4047483.1_g010.1.mk	turquoise
Pav_sc0000096.1_g500.1.mk	brown
Pav_sc0000915.1_g130.1.br	turquoise
Pav_sc0000348.1_g550.1.mk	turquoise
Pav_sc0000030.1_g1030.1.mk	yellow
Pav_sc0001196.1_g1040.1.mk	turquoise
Pav_sc0001211.1_g030.1.mk	turquoise
Pav_sc0000568.1_g340.1.mk	turquoise
Pav_sc0000195.1_g940.1.mk	turquoise
Pav_sc0001580.1_g270.1.mk	turquoise
Pav_sc0000069.1_g300.1.mk	turquoise
Pav_sc0000069.1_g690.1.mk	turquoise
Pav_sc0001309.1_g190.1.mk	turquoise
Pav_sc0000431.1_g200.1.mk	blue
Pav_sc0000960.1_g040.1.mk	green
Pav_sc0000305.1_g140.1.mk	turquoise
Pav_co4015637.1_g010.1.mk	turquoise
Pav_sc0000848.1_g210.1.mk	turquoise
Pav_sc0000623.1_g010.1.br	turquoise
Pav_sc0000800.1_g050.1.mk	red
Pav_sc0000009.1_g430.1.mk	green
Pav_sc0000824.1_g050.1.mk	turquoise
Pav_sc0001405.1_g1510.1.mk	turquoise
Pav_sc0000661.1_g070.1.mk	turquoise
Pav_sc0000381.1_g220.1.mk	turquoise
Pav_sc0000554.1_g2030.1.mk	turquoise
Pav_sc0000107.1_g300.1.mk	turquoise
Pav_sc0000754.1_g410.1.mk	turquoise
Pav_sc0000143.1_g530.1.mk	pink
Pav_sc0002181.1_g120.1.mk	turquoise
Pav_sc0000893.1_g620.1.mk	turquoise
Pav_sc0000493.1_g150.1.mk	turquoise
Pav_sc0002181.1_g310.1.mk	yellow
Pav_sc0000661.1_g130.1.mk	turquoise
Pav_sc0004999.1_g050.1.mk	blue
Pav_sc0000877.1_g850.1.mk	turquoise
Pav_sc0000758.1_g420.1.mk	turquoise
Pav_sc0000129.1_g680.1.mk	turquoise
Pav_sc0000775.1_g210.1.mk	grey
Pav_sc0001181.1_g640.1.mk	turquoise
Pav_sc0000299.1_g380.1.mk	turquoise
Pav_sc0000877.1_g1600.1.mk	turquoise
Pav_sc0000174.1_g570.1.br	turquoise
Pav_sc0002375.1_g060.1.mk	turquoise
Pav_sc0000412.1_g170.1.mk	turquoise
Pav_sc0000890.1_g1290.1.mk	turquoise
Pav_sc0000554.1_g520.1.mk	turquoise
Pav_sc0000304.1_g160.1.mk	turquoise
Pav_sc0001126.1_g250.1.br	turquoise
Pav_sc0000639.1_g060.1.mk	turquoise
Pav_sc0000689.1_g540.1.mk	turquoise
Pav_sc0000084.1_g550.1.mk	turquoise
Pav_sc0001059.1_g590.1.mk	turquoise
Pav_sc0001545.1_g040.1.mk	turquoise
Pav_sc0001305.1_g510.1.mk	turquoise
Pav_sc0000567.1_g700.1.mk	brown
Pav_sc0006824.1_g010.1.mk	blue
Pav_sc0001498.1_g230.1.br	turquoise
Pav_sc0000027.1_g250.1.mk	turquoise
Pav_sc0004456.1_g140.1.mk	blue
Pav_sc0003946.1_g060.1.mk	turquoise
Pav_sc0000373.1_g490.1.mk	turquoise
Pav_sc0000257.1_g200.1.mk	turquoise
Pav_sc0005810.1_g070.1.br	turquoise
Pav_sc0000405.1_g380.1.mk	blue
Pav_sc0000103.1_g1350.1.mk	turquoise
Pav_sc0000017.1_g010.1.mk	turquoise
Pav_sc0000428.1_g420.1.mk	turquoise
Pav_sc0002772.1_g140.1.mk	turquoise
Pav_sc0000583.1_g830.1.mk	brown
Pav_sc0000084.1_g460.1.mk	turquoise
Pav_sc0005077.1_g010.1.br	turquoise
Pav_sc0000732.1_g060.1.mk	green
Pav_sc0000054.1_g080.1.mk	turquoise
Pav_sc0000229.1_g190.1.mk	blue
Pav_sc0000740.1_g310.1.mk	turquoise
Pav_sc0001309.1_g540.1.mk	blue
Pav_sc0003267.1_g020.1.mk	turquoise
Pav_sc0001422.1_g290.1.mk	turquoise
Pav_sc0000405.1_g540.1.mk	turquoise
novel.1335	turquoise
Pav_sc0000890.1_g480.1.mk	turquoise
Pav_sc0000629.1_g110.1.mk	turquoise
Pav_sc0000030.1_g060.1.mk	turquoise
Pav_sc0001205.1_g400.1.mk	turquoise
Pav_sc0000311.1_g140.1.mk	turquoise
Pav_sc0000506.1_g280.1.mk	pink
Pav_sc0001323.1_g410.1.mk	turquoise
Pav_sc0000583.1_g650.1.mk	turquoise
Pav_sc0005028.1_g050.1.br	turquoise
Pav_sc0000624.1_g030.1.mk	turquoise
Pav_sc0000363.1_g280.1.mk	turquoise
Pav_sc0001938.1_g600.1.mk	turquoise
Pav_sc0001405.1_g1050.1.mk	blue
Pav_sc0001107.1_g110.1.mk	turquoise
Pav_sc0000396.1_g810.1.mk	pink
Pav_sc0001006.1_g280.1.mk	turquoise
Pav_sc0003836.1_g010.1.br	turquoise
Pav_sc0002318.1_g240.1.mk	turquoise
Pav_sc0000034.1_g040.1.mk	brown
Pav_sc0001812.1_g030.1.br	turquoise
Pav_sc0001925.1_g110.1.mk	yellow
Pav_sc0000852.1_g1230.1.br	turquoise
Pav_sc0000700.1_g870.1.mk	turquoise
Pav_sc0002327.1_g800.1.mk	turquoise
Pav_sc0000667.1_g500.1.mk	turquoise
Pav_sc0000983.1_g190.1.mk	red
Pav_sc0000410.1_g820.1.mk	turquoise
Pav_sc0000017.1_g730.1.mk	turquoise
Pav_sc0007964.1_g020.1.br	turquoise
Pav_sc0000069.1_g130.1.mk	turquoise
Pav_sc0001102.1_g930.1.br	turquoise
Pav_sc0002206.1_g030.1.mk	blue
Pav_sc0001428.1_g190.1.mk	turquoise
Pav_sc0001003.1_g370.1.mk	magenta
Pav_sc0000558.1_g010.1.br	turquoise
Pav_sc0000006.1_g330.1.mk	turquoise
Pav_co4036973.1_g010.1.mk	turquoise
Pav_sc0000503.1_g160.1.mk	brown
Pav_sc0000129.1_g460.1.mk	turquoise
Pav_sc0001305.1_g070.1.mk	turquoise
Pav_sc0000220.1_g2360.1.mk	brown
novel.1313	red
Pav_sc0002998.1_g100.1.mk	turquoise
Pav_sc0001576.1_g300.1.mk	turquoise
Pav_sc0000843.1_g900.1.mk	pink
Pav_sc0000363.1_g050.1.mk	black
Pav_sc0002348.1_g040.1.br	turquoise
novel.1300	brown
novel.524	turquoise
Pav_sc0002080.1_g180.1.mk	red
Pav_sc0000414.1_g390.1.mk	turquoise
Pav_sc0000142.1_g060.1.mk	turquoise
Pav_sc0000580.1_g090.1.mk	turquoise
Pav_sc0000398.1_g400.1.mk	turquoise
Pav_sc0006088.1_g030.1.mk	turquoise
Pav_sc0000700.1_g1170.1.mk	turquoise
Pav_sc0000915.1_g120.1.br	turquoise
Pav_sc0000848.1_g900.1.mk	turquoise
Pav_sc0000754.1_g440.1.mk	turquoise
Pav_sc0003169.1_g090.1.mk	blue
Pav_sc0002623.1_g220.1.mk	turquoise
Pav_sc0000979.1_g170.1.br	red
Pav_sc0002360.1_g370.1.mk	turquoise
Pav_sc0000375.1_g400.1.mk	turquoise
Pav_sc0001859.1_g360.1.br	turquoise
Pav_co4034867.1_g010.1.br	turquoise
Pav_sc0000096.1_g310.1.mk	turquoise
Pav_sc0000040.1_g770.1.mk	turquoise
Pav_sc0004614.1_g010.1.mk	turquoise
novel.1049	turquoise
Pav_sc0002198.1_g200.1.mk	turquoise
Pav_sc0001280.1_g090.1.mk	turquoise
Pav_sc0001102.1_g250.1.mk	turquoise
Pav_sc0001305.1_g500.1.mk	turquoise
Pav_sc0000108.1_g800.1.mk	turquoise
Pav_sc0000998.1_g460.1.mk	turquoise
Pav_sc0000093.1_g570.1.mk	turquoise
Pav_sc0000359.1_g110.1.mk	turquoise
Pav_sc0001293.1_g140.1.br	turquoise
Pav_sc0000363.1_g700.1.mk	turquoise
Pav_sc0000843.1_g680.1.mk	turquoise
Pav_sc0000072.1_g430.1.mk	green
Pav_sc0001196.1_g2030.1.mk	turquoise
Pav_sc0000375.1_g510.1.mk	turquoise
Pav_sc0001502.1_g420.1.mk	turquoise
Pav_sc0000586.1_g800.1.mk	turquoise
Pav_sc0000040.1_g1090.1.mk	turquoise
Pav_sc0000702.1_g380.1.mk	brown
Pav_sc0000620.1_g050.1.mk	turquoise
Pav_sc0001963.1_g430.1.mk	turquoise
Pav_sc0007696.1_g040.1.mk	turquoise
Pav_sc0000622.1_g050.1.br	turquoise
Pav_sc0002157.1_g030.1.mk	turquoise
Pav_sc0000206.1_g420.1.mk	blue
Pav_sc0006018.1_g050.1.mk	blue
Pav_sc0001051.1_g190.1.mk	turquoise
Pav_sc0001342.1_g070.1.mk	brown
Pav_sc0000040.1_g300.1.br	blue
Pav_sc0001355.1_g030.1.mk	black
Pav_sc0003584.1_g060.1.br	turquoise
Pav_sc0000009.1_g1040.1.mk	blue
Pav_sc0006018.1_g180.1.mk	turquoise
Pav_sc0000598.1_g350.1.mk	purple
Pav_sc0001196.1_g1100.1.mk	turquoise
Pav_sc0001529.1_g060.1.mk	turquoise
Pav_sc0000754.1_g700.1.mk	turquoise
Pav_sc0000370.1_g940.1.mk	brown
Pav_sc0000130.1_g640.1.mk	blue
Pav_sc0001251.1_g130.1.mk	turquoise
Pav_sc0002141.1_g090.1.mk	turquoise
Pav_sc0000410.1_g420.1.mk	turquoise
Pav_sc0000129.1_g1000.1.mk	turquoise
novel.810	turquoise
Pav_sc0000582.1_g130.1.mk	blue
Pav_sc0000825.1_g200.1.mk	turquoise
Pav_sc0000910.1_g530.1.mk	turquoise
Pav_sc0000502.1_g450.1.mk	brown
Pav_sc0001339.1_g050.1.mk	yellow
Pav_sc0000852.1_g1220.1.mk	turquoise
Pav_sc0000764.1_g380.1.mk	turquoise
Pav_sc0000396.1_g510.1.mk	turquoise
novel.580	turquoise
Pav_sc0001080.1_g730.1.mk	turquoise
Pav_sc0000200.1_g150.1.br	turquoise
Pav_sc0000130.1_g860.1.mk	turquoise
Pav_sc0000488.1_g490.1.mk	turquoise
Pav_sc0001175.1_g090.1.mk	turquoise
Pav_sc0000099.1_g680.1.mk	turquoise
Pav_sc0000220.1_g1580.1.mk	turquoise
Pav_sc0000164.1_g220.1.mk	turquoise
Pav_sc0000465.1_g1310.1.mk	turquoise
Pav_sc0001192.1_g150.1.mk	turquoise
Pav_sc0000085.1_g220.1.mk	turquoise
Pav_sc0000624.1_g520.1.mk	turquoise
Pav_sc0002208.1_g880.1.mk	blue
Pav_sc0000852.1_g620.1.mk	turquoise
Pav_sc0001009.1_g380.1.mk	turquoise
Pav_sc0000130.1_g530.1.mk	turquoise
Pav_sc0001710.1_g1400.1.mk	turquoise
Pav_sc0012284.1_g020.1.mk	turquoise
Pav_sc0001405.1_g1870.1.mk	blue
Pav_sc0004766.1_g040.1.mk	turquoise
Pav_sc0000754.1_g420.1.mk	turquoise
Pav_sc0000195.1_g410.1.mk	turquoise
Pav_sc0001305.1_g520.1.mk	turquoise
Pav_co4005701.1_g010.1.mk	turquoise
Pav_sc0002451.1_g370.1.br	turquoise
Pav_sc0004354.1_g120.1.mk	turquoise
novel.1041	turquoise
Pav_sc0000412.1_g480.1.mk	yellow
Pav_sc0001196.1_g2220.1.mk	grey
Pav_sc0010834.1_g010.1.br	grey
Pav_sc0000877.1_g1910.1.mk	turquoise
Pav_sc0000629.1_g050.1.mk	turquoise
Pav_sc0000525.1_g420.1.mk	turquoise
Pav_sc0001040.1_g210.1.br	turquoise
Pav_sc0003823.1_g110.1.mk	turquoise
Pav_sc0000583.1_g1290.1.mk	turquoise
Pav_sc0000608.1_g070.1.mk	red
Pav_sc0000054.1_g230.1.mk	turquoise
Pav_sc0000567.1_g170.1.mk	turquoise
Pav_sc0000428.1_g350.1.mk	turquoise
Pav_sc0000893.1_g1250.1.mk	yellow
Pav_sc0000653.1_g040.1.mk	turquoise
Pav_sc0001124.1_g250.1.mk	turquoise
Pav_sc0001797.1_g480.1.mk	turquoise
Pav_sc0002250.1_g070.1.mk	turquoise
Pav_sc0001183.1_g340.1.mk	green
Pav_sc0003894.1_g030.1.mk	turquoise
Pav_sc0001827.1_g130.1.mk	turquoise
Pav_sc0000886.1_g550.1.mk	blue
Pav_sc0002327.1_g730.1.mk	turquoise
Pav_sc0002136.1_g080.1.mk	turquoise
Pav_sc0001051.1_g180.1.mk	turquoise
Pav_sc0007253.1_g100.1.mk	turquoise
Pav_sc0000789.1_g110.1.mk	turquoise
Pav_sc0000890.1_g1490.1.mk	turquoise
Pav_sc0001309.1_g150.1.mk	turquoise
Pav_co4027163.1_g010.1.br	turquoise
Pav_sc0000085.1_g050.1.mk	turquoise
Pav_sc0000910.1_g250.1.mk	turquoise
Pav_sc0000112.1_g100.1.mk	turquoise
Pav_sc0000069.1_g480.1.mk	turquoise
Pav_sc0000037.1_g580.1.mk	turquoise
Pav_sc0000766.1_g250.1.mk	turquoise
Pav_sc0000222.1_g020.1.mk	turquoise
Pav_sc0000103.1_g260.1.mk	turquoise
Pav_sc0000042.1_g610.1.mk	turquoise
Pav_sc0001774.1_g010.1.mk	red
Pav_sc0001309.1_g650.1.mk	turquoise
Pav_sc0000491.1_g500.1.mk	turquoise
novel.743	turquoise
novel.253	turquoise
Pav_sc0000130.1_g490.1.mk	brown
Pav_sc0001539.1_g100.1.mk	black
Pav_sc0000379.1_g090.1.mk	turquoise
novel.1208	blue
Pav_sc0000398.1_g390.1.mk	turquoise
Pav_sc0000399.1_g130.1.mk	blue
Pav_sc0003473.1_g010.1.mk	turquoise
Pav_sc0000065.1_g400.1.mk	turquoise
Pav_sc0001416.1_g140.1.mk	turquoise
Pav_sc0002181.1_g260.1.mk	yellow
Pav_sc0005328.1_g010.1.br	turquoise
Pav_sc0000869.1_g530.1.mk	turquoise
Pav_sc0000100.1_g230.1.br	turquoise
Pav_sc0001708.1_g040.1.mk	turquoise
Pav_sc0000714.1_g350.1.br	turquoise
Pav_sc0000212.1_g090.1.mk	turquoise
Pav_sc0000100.1_g350.1.mk	turquoise
Pav_sc0000405.1_g550.1.mk	green
Pav_sc0001335.1_g050.1.mk	turquoise
Pav_sc0000129.1_g1600.1.mk	turquoise
Pav_sc0000586.1_g930.1.mk	turquoise
Pav_sc0001051.1_g220.1.mk	black
Pav_sc0000099.1_g860.1.mk	blue
Pav_sc0001084.1_g380.1.mk	turquoise
Pav_sc0000544.1_g110.1.mk	turquoise
Pav_sc0001932.1_g120.1.mk	turquoise
Pav_sc0000138.1_g1010.1.mk	turquoise
Pav_sc0001540.1_g340.1.mk	red
Pav_sc0001502.1_g170.1.mk	turquoise
Pav_sc0002722.1_g120.1.mk	turquoise
Pav_sc0001718.1_g150.1.mk	turquoise
Pav_sc0000583.1_g530.1.mk	turquoise
Pav_sc0001323.1_g780.1.mk	turquoise
Pav_sc0002722.1_g040.1.mk	turquoise
Pav_sc0000067.1_g170.1.br	turquoise
Pav_sc0000755.1_g040.1.mk	turquoise
Pav_co4009049.1_g010.1.br	turquoise
Pav_sc0000229.1_g410.1.mk	turquoise
Pav_sc0002055.1_g300.1.mk	turquoise
Pav_sc0002342.1_g040.1.br	turquoise
Pav_sc0004735.1_g130.1.mk	blue
Pav_co4002539.1_g010.1.mk	turquoise
Pav_sc0000636.1_g250.1.mk	turquoise
Pav_sc0000451.1_g060.1.mk	turquoise
Pav_sc0004043.1_g070.1.mk	turquoise
Pav_sc0000910.1_g790.1.mk	green
Pav_sc0000201.1_g300.1.mk	turquoise
Pav_sc0002326.1_g270.1.mk	turquoise
Pav_sc0001909.1_g090.1.br	turquoise
Pav_sc0001088.1_g130.1.mk	turquoise
Pav_sc0000484.1_g740.1.mk	turquoise
Pav_sc0000503.1_g090.1.mk	turquoise
Pav_sc0000638.1_g670.1.mk	blue
Pav_sc0000229.1_g330.1.mk	blue
Pav_sc0000130.1_g870.1.mk	blue
Pav_sc0000558.1_g600.1.mk	blue
Pav_sc0000893.1_g310.1.mk	yellow
Pav_sc0001305.1_g980.1.mk	brown
Pav_sc0001938.1_g500.1.mk	turquoise
Pav_sc0002208.1_g600.1.mk	turquoise
Pav_sc0000573.1_g010.1.mk	turquoise
Pav_sc0002233.1_g270.1.mk	turquoise
Pav_sc0000052.1_g750.1.mk	turquoise
Pav_sc0000245.1_g150.1.mk	turquoise
Pav_sc0004456.1_g030.1.mk	turquoise
Pav_sc0002060.1_g030.1.br	turquoise
Pav_sc0001051.1_g610.1.mk	turquoise
Pav_sc0000044.1_g920.1.mk	blue
Pav_sc0000087.1_g250.1.mk	blue
Pav_sc0000143.1_g080.1.mk	brown
Pav_sc0001309.1_g850.1.mk	purple
Pav_sc0002024.1_g030.1.mk	turquoise
novel.919	turquoise
Pav_sc0000598.1_g270.1.mk	turquoise
Pav_sc0000194.1_g140.1.mk	turquoise
Pav_sc0002055.1_g050.1.mk	turquoise
Pav_sc0012645.1_g030.1.mk	turquoise
Pav_sc0000089.1_g030.1.mk	blue
Pav_sc0001196.1_g1730.1.mk	turquoise
Pav_sc0000909.1_g310.1.mk	turquoise
Pav_sc0003744.1_g140.1.mk	blue
Pav_sc0004456.1_g070.1.mk	turquoise
Pav_sc0000220.1_g1340.1.mk	turquoise
Pav_sc0001807.1_g160.1.mk	turquoise
Pav_sc0002285.1_g060.1.mk	turquoise
Pav_sc0000138.1_g580.1.mk	turquoise
Pav_sc0000707.1_g070.1.br	yellow
Pav_sc0000195.1_g360.1.mk	blue
Pav_sc0000689.1_g300.1.mk	turquoise
Pav_sc0000129.1_g950.1.mk	blue
Pav_sc0000040.1_g880.1.mk	turquoise
Pav_sc0001699.1_g120.1.br	turquoise
Pav_sc0000586.1_g100.1.mk	turquoise
Pav_sc0001239.1_g110.1.mk	blue
Pav_sc0000499.1_g140.1.mk	turquoise
Pav_sc0000102.1_g300.1.mk	yellow
Pav_sc0001218.1_g170.1.mk	red
Pav_sc0007100.1_g030.1.mk	turquoise
Pav_sc0005366.1_g010.1.br	turquoise
Pav_sc0000057.1_g010.1.mk	turquoise
novel.140	turquoise
Pav_sc0000729.1_g020.1.mk	black
Pav_sc0000719.1_g810.1.mk	turquoise
Pav_sc0000065.1_g250.1.br	turquoise
Pav_sc0001938.1_g280.1.mk	turquoise
novel.240	turquoise
novel.1045	turquoise
Pav_sc0012008.1_g010.1.mk	turquoise
Pav_sc0000890.1_g420.1.mk	brown
Pav_sc0000759.1_g310.1.mk	turquoise
Pav_sc0000848.1_g140.1.mk	turquoise
Pav_sc0000308.1_g420.1.mk	turquoise
Pav_sc0000648.1_g270.1.mk	blue
Pav_sc0002327.1_g410.1.mk	turquoise
Pav_sc0000147.1_g070.1.br	yellow
Pav_sc0002060.1_g060.1.mk	pink
Pav_sc0000689.1_g450.1.mk	turquoise
Pav_sc0000254.1_g1220.1.mk	turquoise
Pav_sc0000581.1_g060.1.mk	turquoise
Pav_sc0001077.1_g430.1.mk	blue
Pav_sc0011987.1_g020.1.mk	turquoise
Pav_sc0000558.1_g290.1.mk	pink
Pav_sc0000323.1_g490.1.mk	turquoise
Pav_sc0001869.1_g810.1.mk	turquoise
Pav_sc0000862.1_g350.1.mk	turquoise
Pav_sc0000567.1_g1060.1.mk	green
Pav_sc0000023.1_g280.1.mk	turquoise
Pav_sc0000484.1_g470.1.mk	turquoise
novel.1268	turquoise
Pav_sc0000040.1_g1050.1.mk	turquoise
Pav_sc0000094.1_g580.1.mk	turquoise
Pav_sc0000241.1_g080.1.mk	turquoise
Pav_sc0002584.1_g200.1.mk	turquoise
Pav_sc0000584.1_g350.1.mk	turquoise
Pav_sc0003434.1_g170.1.mk	red
Pav_sc0001196.1_g1870.1.mk	turquoise
Pav_sc0005132.1_g010.1.mk	blue
Pav_sc0000308.1_g460.1.mk	turquoise
Pav_sc0001240.1_g090.1.mk	turquoise
Pav_sc0001877.1_g050.1.mk	turquoise
Pav_sc0002893.1_g370.1.mk	turquoise
novel.1326	turquoise
Pav_sc0002019.1_g060.1.mk	blue
Pav_sc0002515.1_g020.1.mk	turquoise
Pav_sc0000704.1_g560.1.mk	turquoise
Pav_sc0001938.1_g440.1.mk	brown
Pav_sc0000598.1_g010.1.br	turquoise
Pav_sc0000009.1_g500.1.br	turquoise
Pav_sc0002608.1_g010.1.mk	turquoise
Pav_sc0001663.1_g180.1.mk	blue
Pav_sc0004226.1_g050.1.mk	turquoise
Pav_sc0003582.1_g100.1.br	turquoise
Pav_co4075481.1_g010.1.mk	turquoise
Pav_sc0001422.1_g330.1.mk	turquoise
Pav_sc0000130.1_g190.1.mk	turquoise
Pav_sc0000129.1_g1540.1.mk	grey
Pav_sc0001248.1_g380.1.mk	green
Pav_sc0000848.1_g840.1.mk	turquoise
Pav_sc0002327.1_g080.1.mk	turquoise
Pav_sc0003434.1_g020.1.mk	turquoise
Pav_sc0000200.1_g110.1.br	turquoise
Pav_sc0000852.1_g520.1.mk	turquoise
Pav_sc0001205.1_g070.1.mk	turquoise
Pav_sc0000704.1_g470.1.mk	turquoise
Pav_sc0001488.1_g330.1.mk	turquoise
Pav_co4033671.1_g010.1.mk	turquoise
Pav_sc0000719.1_g800.1.mk	turquoise
Pav_sc0000789.1_g090.1.mk	turquoise
novel.629	red
Pav_co4015577.1_g010.1.mk	turquoise
Pav_sc0000396.1_g1100.1.mk	turquoise
Pav_sc0000055.1_g230.1.mk	turquoise
novel.1155	turquoise
Pav_co4011033.1_g010.1.mk	turquoise
Pav_sc0003562.1_g140.1.mk	red
Pav_sc0000158.1_g110.1.mk	turquoise
Pav_sc0000493.1_g010.1.mk	turquoise
Pav_sc0000184.1_g320.1.mk	turquoise
Pav_sc0002445.1_g040.1.mk	turquoise
Pav_sc0002055.1_g130.1.mk	turquoise
Pav_sc0000679.1_g150.1.br	turquoise
Pav_sc0000103.1_g1620.1.mk	turquoise
Pav_sc0002360.1_g1000.1.br	turquoise
Pav_sc0004354.1_g100.1.mk	turquoise
Pav_sc0000877.1_g480.1.mk	turquoise
Pav_sc0001770.1_g140.1.mk	yellow
Pav_sc0001102.1_g1040.1.mk	turquoise
Pav_sc0000554.1_g1690.1.mk	turquoise
Pav_sc0002318.1_g540.1.mk	turquoise
Pav_sc0001582.1_g330.1.mk	turquoise
Pav_sc0000054.1_g210.1.mk	turquoise
Pav_sc0000832.1_g300.1.mk	blue
Pav_sc0002360.1_g790.1.mk	turquoise
Pav_sc0001126.1_g170.1.mk	turquoise
Pav_sc0000254.1_g230.1.mk	green
Pav_sc0000038.1_g400.1.br	red
Pav_sc0000428.1_g530.1.mk	yellow
Pav_sc0000351.1_g520.1.br	turquoise
Pav_sc0000257.1_g230.1.mk	yellow
Pav_sc0000543.1_g590.1.mk	turquoise
Pav_sc0001059.1_g390.1.mk	blue
Pav_sc0000027.1_g400.1.mk	turquoise
Pav_co4037907.1_g010.1.mk	turquoise
Pav_sc0000363.1_g390.1.mk	turquoise
Pav_sc0000744.1_g440.1.mk	turquoise
Pav_sc0003721.1_g010.1.br	turquoise
Pav_sc0000862.1_g270.1.mk	turquoise
Pav_sc0000568.1_g030.1.br	blue
Pav_sc0000625.1_g360.1.mk	magenta
Pav_sc0000536.1_g130.1.mk	turquoise
Pav_sc0000207.1_g900.1.mk	turquoise
Pav_sc0000095.1_g1520.1.mk	blue
Pav_sc0000893.1_g400.1.mk	turquoise
Pav_sc0012645.1_g020.1.mk	turquoise
Pav_sc0000764.1_g150.1.mk	turquoise
Pav_sc0000410.1_g360.1.mk	turquoise
Pav_sc0012525.1_g010.1.mk	turquoise
Pav_sc0000793.1_g230.1.mk	turquoise
Pav_sc0002287.1_g020.1.mk	magenta
Pav_sc0000852.1_g1110.1.mk	blue
Pav_sc0002589.1_g030.1.mk	blue
Pav_sc0001513.1_g020.1.mk	turquoise
Pav_sc0000981.1_g470.1.mk	turquoise
Pav_sc0002106.1_g220.1.mk	turquoise
Pav_sc0002934.1_g040.1.mk	turquoise
Pav_sc0002318.1_g130.1.br	turquoise
Pav_sc0000220.1_g990.1.br	yellow
Pav_sc0000102.1_g210.1.mk	turquoise
Pav_sc0001181.1_g720.1.mk	turquoise
Pav_co4019015.1_g010.1.mk	turquoise
Pav_co4073645.1_g010.1.mk	red
novel.604	turquoise
Pav_sc0000203.1_g050.1.mk	turquoise
novel.565	yellow
Pav_sc0000449.1_g490.1.mk	turquoise
Pav_sc0006257.1_g030.1.mk	turquoise
Pav_sc0001181.1_g520.1.mk	turquoise
Pav_sc0001331.1_g080.1.mk	yellow
Pav_sc0000480.1_g840.1.mk	turquoise
novel.1241	turquoise
Pav_sc0002828.1_g580.1.mk	turquoise
Pav_sc0002582.1_g080.1.mk	turquoise
Pav_sc0000813.1_g140.1.mk	turquoise
Pav_sc0000348.1_g210.1.mk	turquoise
Pav_sc0001699.1_g660.1.mk	blue
novel.363	turquoise
Pav_sc0005707.1_g020.1.br	blue
Pav_sc0008544.1_g020.1.mk	turquoise
Pav_sc0002206.1_g340.1.mk	blue
Pav_sc0000625.1_g030.1.mk	turquoise
Pav_sc0000362.1_g020.1.mk	turquoise
Pav_sc0000758.1_g440.1.mk	turquoise
novel.1123	turquoise
Pav_sc0000063.1_g120.1.mk	turquoise
Pav_sc0003098.1_g090.1.br	turquoise
Pav_sc0000728.1_g010.1.mk	blue
Pav_sc0000119.1_g610.1.mk	turquoise
Pav_sc0000157.1_g860.1.mk	turquoise
Pav_sc0000119.1_g450.1.mk	turquoise
Pav_sc0006414.1_g010.1.mk	turquoise
Pav_sc0000631.1_g090.1.mk	pink
Pav_sc0002208.1_g500.1.mk	turquoise
Pav_sc0000004.1_g040.1.mk	turquoise
Pav_sc0001411.1_g190.1.mk	turquoise
Pav_sc0000293.1_g570.1.mk	turquoise
Pav_sc0000617.1_g490.1.mk	turquoise
Pav_sc0000045.1_g440.1.mk	turquoise
Pav_sc0000852.1_g770.1.mk	blue
Pav_sc0000983.1_g630.1.mk	turquoise
Pav_sc0000254.1_g1310.1.br	blue
novel.61	turquoise
Pav_sc0000704.1_g430.1.mk	purple
Pav_sc0000747.1_g100.1.mk	turquoise
Pav_sc0001488.1_g030.1.mk	turquoise
Pav_sc0001341.1_g490.1.mk	turquoise
Pav_sc0000072.1_g130.1.br	magenta
Pav_sc0000491.1_g950.1.br	turquoise
Pav_sc0000212.1_g1910.1.mk	turquoise
Pav_sc0000348.1_g470.1.mk	turquoise
Pav_sc0002250.1_g200.1.mk	turquoise
Pav_sc0002842.1_g030.1.mk	turquoise
Pav_sc0000212.1_g540.1.mk	turquoise
Pav_sc0002608.1_g090.1.mk	turquoise
Pav_sc0000480.1_g910.1.mk	turquoise
Pav_sc0001084.1_g140.1.mk	brown
Pav_sc0000051.1_g450.1.mk	turquoise
Pav_sc0001265.1_g160.1.mk	red
Pav_sc0001169.1_g030.1.mk	turquoise
Pav_sc0000220.1_g010.1.br	turquoise
novel.1279	turquoise
Pav_sc0002234.1_g030.1.mk	turquoise
Pav_sc0000257.1_g050.1.mk	yellow
novel.1329	turquoise
Pav_sc0000582.1_g810.1.mk	turquoise
Pav_sc0001191.1_g240.1.mk	turquoise
Pav_sc0000138.1_g900.1.mk	red
Pav_sc0001029.1_g020.1.mk	turquoise
Pav_sc0005957.1_g010.1.mk	turquoise
Pav_sc0000410.1_g570.1.br	turquoise
Pav_sc0000869.1_g540.1.br	turquoise
Pav_sc0001869.1_g290.1.br	turquoise
Pav_sc0000129.1_g730.1.mk	turquoise
Pav_sc0000164.1_g080.1.mk	turquoise
Pav_sc0001938.1_g550.1.mk	blue
Pav_sc0000103.1_g1240.1.mk	turquoise
Pav_sc0001267.1_g090.1.mk	turquoise
Pav_sc0000852.1_g470.1.mk	turquoise
Pav_sc0001944.1_g100.1.mk	yellow
Pav_sc0000311.1_g330.1.br	black
Pav_sc0001203.1_g140.1.mk	blue
Pav_sc0001183.1_g270.1.mk	turquoise
Pav_sc0000908.1_g280.1.mk	blue
Pav_sc0000500.1_g300.1.mk	pink
Pav_sc0000567.1_g390.1.mk	turquoise
novel.1372	brown
Pav_sc0002387.1_g180.1.br	turquoise
Pav_sc0005752.1_g030.1.br	turquoise
Pav_sc0000800.1_g220.1.mk	turquoise
Pav_sc0001341.1_g250.1.mk	blue
Pav_sc0000752.1_g140.1.br	blue
Pav_sc0001909.1_g040.1.br	turquoise
Pav_sc0000624.1_g460.1.mk	turquoise
Pav_sc0003682.1_g110.1.br	turquoise
Pav_sc0001196.1_g790.1.mk	turquoise
Pav_sc0000274.1_g070.1.mk	turquoise
Pav_sc0001126.1_g080.1.mk	brown
Pav_sc0001040.1_g510.1.mk	turquoise
Pav_sc0001080.1_g450.1.br	turquoise
Pav_sc0000383.1_g280.1.mk	turquoise
Pav_sc0000729.1_g310.1.br	turquoise
Pav_sc0000216.1_g520.1.mk	turquoise
Pav_sc0000652.1_g820.1.mk	turquoise
Pav_sc0002024.1_g080.1.mk	turquoise
Pav_sc0002233.1_g520.1.mk	turquoise
Pav_sc0000257.1_g280.1.mk	turquoise
Pav_sc0000259.1_g250.1.mk	red
Pav_sc0001963.1_g570.1.mk	brown
Pav_sc0001974.1_g080.1.mk	turquoise
Pav_sc0000355.1_g050.1.mk	turquoise
Pav_sc0001112.1_g090.1.br	turquoise
Pav_sc0000052.1_g700.1.mk	turquoise
Pav_sc0001073.1_g260.1.mk	red
novel.391	turquoise
Pav_sc0004305.1_g220.1.mk	turquoise
Pav_sc0010060.1_g010.1.mk	turquoise
novel.634	turquoise
novel.807	turquoise
Pav_sc0000212.1_g970.1.mk	turquoise
novel.888	turquoise
Pav_sc0000410.1_g470.1.mk	turquoise
Pav_sc0001003.1_g180.1.mk	yellow
Pav_sc0001323.1_g390.1.mk	turquoise
Pav_sc0001411.1_g730.1.mk	turquoise
Pav_sc0000017.1_g410.1.mk	blue
Pav_sc0000395.1_g040.1.mk	turquoise
Pav_sc0000729.1_g190.1.br	turquoise
Pav_sc0000854.1_g020.1.mk	green
Pav_sc0002567.1_g150.1.mk	turquoise
Pav_sc0000142.1_g080.1.mk	turquoise
Pav_sc0000716.1_g520.1.mk	turquoise
Pav_sc0001258.1_g450.1.mk	brown
Pav_sc0001243.1_g500.1.mk	turquoise
Pav_sc0001595.1_g260.1.mk	blue
Pav_sc0000488.1_g420.1.mk	blue
Pav_sc0002424.1_g030.1.mk	turquoise
Pav_sc0000813.1_g050.1.mk	turquoise
Pav_sc0008499.1_g010.1.br	turquoise
novel.1381	turquoise
Pav_sc0000617.1_g130.1.mk	turquoise
Pav_sc0000631.1_g160.1.mk	turquoise
Pav_sc0001227.1_g140.1.mk	turquoise
novel.773	turquoise
Pav_sc0000764.1_g320.1.mk	turquoise
Pav_sc0000431.1_g130.1.mk	turquoise
Pav_sc0001710.1_g1550.1.mk	blue
Pav_sc0005470.1_g010.1.mk	turquoise
Pav_sc0003135.1_g920.1.mk	turquoise
novel.1079	turquoise
Pav_sc0000934.1_g020.1.br	turquoise
Pav_sc0000099.1_g520.1.mk	turquoise
Pav_sc0000848.1_g020.1.mk	turquoise
Pav_sc0000843.1_g930.1.mk	turquoise
Pav_sc0000598.1_g740.1.mk	turquoise
novel.1294	blue
Pav_sc0000103.1_g090.1.mk	turquoise
Pav_sc0000305.1_g100.1.mk	turquoise
Pav_sc0002154.1_g200.1.mk	turquoise
Pav_sc0000639.1_g200.1.mk	turquoise
Pav_sc0001710.1_g1210.1.mk	turquoise
novel.1043	turquoise
Pav_sc0001309.1_g260.1.mk	turquoise
Pav_co3992447.1_g010.1.mk	turquoise
Pav_sc0001205.1_g410.1.mk	black
Pav_sc0001364.1_g030.1.mk	turquoise
Pav_sc0000351.1_g410.1.mk	turquoise
Pav_sc0000648.1_g240.1.mk	turquoise
Pav_sc0000099.1_g650.1.mk	turquoise
Pav_sc0009945.1_g020.1.mk	turquoise
Pav_sc0004467.1_g120.1.mk	turquoise
Pav_sc0005707.1_g010.1.mk	brown
Pav_sc0000352.1_g060.1.mk	turquoise
Pav_sc0000143.1_g800.1.mk	turquoise
novel.263	turquoise
Pav_sc0000557.1_g750.1.mk	turquoise
Pav_sc0001240.1_g070.1.mk	black
Pav_sc0000229.1_g400.1.mk	turquoise
Pav_sc0002451.1_g360.1.br	turquoise
Pav_sc0000756.1_g020.1.mk	turquoise
Pav_sc0001700.1_g010.1.mk	turquoise
Pav_sc0001335.1_g560.1.mk	turquoise
Pav_sc0002197.1_g030.1.mk	brown
Pav_sc0000522.1_g010.1.mk	turquoise
Pav_sc0000212.1_g430.1.mk	turquoise
Pav_sc0000138.1_g170.1.mk	blue
Pav_sc0000845.1_g250.1.mk	turquoise
Pav_sc0000358.1_g160.1.mk	turquoise
Pav_sc0002106.1_g370.1.mk	turquoise
Pav_sc0000691.1_g430.1.mk	turquoise
Pav_sc0000691.1_g830.1.mk	turquoise
Pav_sc0001183.1_g510.1.mk	turquoise
Pav_sc0007822.1_g010.1.mk	turquoise
Pav_sc0007753.1_g010.1.br	turquoise
Pav_sc0000399.1_g110.1.mk	turquoise
novel.71	turquoise
Pav_sc0000029.1_g140.1.mk	turquoise
Pav_sc0000157.1_g070.1.mk	turquoise
Pav_sc0001580.1_g260.1.mk	blue
Pav_sc0000257.1_g340.1.mk	turquoise
Pav_sc0000481.1_g130.1.mk	turquoise
Pav_sc0001497.1_g090.1.mk	turquoise
Pav_sc0000702.1_g340.1.mk	turquoise
Pav_sc0000359.1_g230.1.mk	turquoise
Pav_sc0000064.1_g020.1.br	turquoise
Pav_sc0000354.1_g420.1.mk	turquoise
Pav_sc0001528.1_g190.1.mk	turquoise
Pav_sc0001938.1_g420.1.mk	turquoise
Pav_sc0000028.1_g060.1.mk	green
Pav_sc0009864.1_g010.1.mk	green
Pav_sc0003093.1_g020.1.br	turquoise
novel.385	blue
Pav_sc0003823.1_g060.1.mk	turquoise
Pav_sc0001215.1_g320.1.mk	black
Pav_sc0001869.1_g260.1.mk	turquoise
Pav_sc0000977.1_g150.1.mk	turquoise
Pav_sc0000260.1_g280.1.mk	blue
Pav_sc0003135.1_g710.1.mk	yellow
Pav_sc0001710.1_g300.1.mk	turquoise
Pav_sc0000669.1_g050.1.mk	turquoise
Pav_sc0000095.1_g950.1.mk	turquoise
Pav_sc0000869.1_g450.1.mk	turquoise
Pav_sc0002206.1_g320.1.mk	turquoise
Pav_sc0001411.1_g480.1.mk	turquoise
Pav_sc0002963.1_g010.1.mk	yellow
Pav_sc0000373.1_g420.1.mk	turquoise
Pav_sc0000418.1_g350.1.mk	turquoise
Pav_sc0000373.1_g820.1.mk	turquoise
Pav_sc0001323.1_g1090.1.mk	turquoise
Pav_sc0000484.1_g160.1.mk	turquoise
Pav_sc0000482.1_g240.1.mk	blue
Pav_sc0000813.1_g230.1.br	turquoise
Pav_sc0000981.1_g380.1.mk	blue
Pav_sc0004290.1_g030.1.mk	pink
Pav_sc0002264.1_g050.1.br	turquoise
Pav_sc0001313.1_g180.1.mk	red
Pav_sc0001003.1_g140.1.mk	turquoise
Pav_sc0000484.1_g430.1.mk	turquoise
Pav_sc0006018.1_g110.1.mk	yellow
Pav_sc0000428.1_g300.1.mk	turquoise
Pav_sc0000582.1_g890.1.mk	black
Pav_sc0000890.1_g1200.1.mk	turquoise
Pav_sc0000766.1_g300.1.mk	blue
Pav_sc0000716.1_g500.1.mk	turquoise
Pav_sc0002722.1_g290.1.mk	blue
Pav_sc0004290.1_g090.1.mk	turquoise
Pav_sc0001345.1_g140.1.mk	turquoise
Pav_sc0000164.1_g190.1.br	turquoise
Pav_sc0000877.1_g1370.1.mk	turquoise
Pav_sc0002176.1_g150.1.mk	turquoise
Pav_sc0001191.1_g120.1.mk	turquoise
Pav_sc0010449.1_g010.1.mk	turquoise
Pav_sc0000212.1_g1610.1.mk	turquoise
Pav_sc0000431.1_g230.1.br	red
Pav_sc0000754.1_g690.1.mk	blue
Pav_sc0000624.1_g2220.1.mk	turquoise
Pav_sc0000162.1_g340.1.mk	yellow
Pav_sc0000138.1_g390.1.mk	turquoise
Pav_sc0004456.1_g210.1.mk	yellow
Pav_sc0001309.1_g1250.1.mk	turquoise
Pav_sc0001540.1_g050.1.br	turquoise
Pav_sc0000549.1_g840.1.mk	turquoise
Pav_sc0000600.1_g520.1.mk	turquoise
Pav_sc0000700.1_g350.1.mk	blue
Pav_sc0002792.1_g290.1.mk	blue
Pav_sc0005660.1_g030.1.mk	brown
[truncated: 2,219 more rows]

## Sheet: S5
table S5 The MM and GS between 3 candidate modules genes and 2 anthocyanin components
Cyanidin 3-O-glucoside & pink module				Cyanidin 3-O-glucoside & turquoise moudle				Cyanidin 3-O-glucoside & blue moudle				Cyanidin 3-O-rutinoside & blue moudle				Cyanidin 3-O-rutinoside & pink moudle				Cyanidin 3-O-rutinoside & turquoise moudle
gene_id	MM	GS	Module	gene_id	MM	GS	Module	gene_id	MM	GS	Module	gene_id	MM	GS	Module	gene_id	MM	GS	Module	gene_id	MM	GS	Module
Pav_sc0000555.1_g310.1.mk	0.972408	0.846348	pink	Pav_sc0001280.1_g650.1.mk	0.990424	0.933106	turquoise	Pav_sc0000759.1_g180.1.mk	0.976362	-0.658738	blue	Pav_sc0000759.1_g180.1.mk	0.976362	-0.784985	blue	Pav_sc0000555.1_g310.1.mk	0.972408	0.75153	pink	Pav_sc0001280.1_g650.1.mk	0.990424	0.875931	turquoise
Pav_sc0002722.1_g050.1.mk	0.971425	0.921012	pink	Pav_sc0002318.1_g040.1.mk	0.989834	0.893122	turquoise	Pav_sc0000675.1_g390.1.mk	0.973213	-0.734119	blue	Pav_sc0000675.1_g390.1.mk	0.973213	-0.842577	blue	Pav_sc0002722.1_g050.1.mk	0.971425	0.849369	pink	Pav_sc0002318.1_g040.1.mk	0.989834	0.82364	turquoise
Pav_sc0000500.1_g030.1.mk	0.963616	0.866669	pink	Pav_sc0001215.1_g090.1.mk	0.98886	0.89682	turquoise	Pav_sc0000051.1_g280.1.mk	0.972591	-0.750366	blue	Pav_sc0000051.1_g280.1.mk	0.972591	-0.848073	blue	Pav_sc0000500.1_g030.1.mk	0.963616	0.832593	pink	Pav_sc0001215.1_g090.1.mk	0.98886	0.809054	turquoise
Pav_sc0000631.1_g090.1.mk	0.960656	0.853807	pink	Pav_sc0000084.1_g790.1.mk	0.988348	0.90766	turquoise	Pav_sc0000502.1_g380.1.mk	0.969133	-0.74192	blue	Pav_sc0000502.1_g380.1.mk	0.969133	-0.846377	blue	Pav_sc0000631.1_g090.1.mk	0.960656	0.750575	pink	Pav_sc0000084.1_g790.1.mk	0.988348	0.858406	turquoise
Pav_sc0000500.1_g300.1.mk	0.958499	0.888409	pink	Pav_sc0006018.1_g290.1.mk	0.988111	0.928748	turquoise	Pav_sc0003135.1_g080.1.mk	0.96875	-0.755913	blue	Pav_sc0003135.1_g080.1.mk	0.96875	-0.878453	blue	Pav_sc0000500.1_g300.1.mk	0.958499	0.83707	pink	Pav_sc0006018.1_g290.1.mk	0.988111	0.863862	turquoise
Pav_sc0004290.1_g030.1.mk	0.957061	0.832259	pink	Pav_sc0000843.1_g1030.1.br	0.9866	0.863652	turquoise	Pav_sc0000254.1_g270.1.mk	0.968473	-0.687332	blue	Pav_sc0000254.1_g270.1.mk	0.968473	-0.799605	blue	Pav_sc0004290.1_g030.1.mk	0.957061	0.769502	pink	Pav_sc0000843.1_g1030.1.br	0.9866	0.791112	turquoise
Pav_sc0000257.1_g530.1.mk	0.955326	0.844853	pink	Pav_sc0010284.1_g010.1.mk	0.985629	0.931348	turquoise	Pav_sc0000843.1_g520.1.mk	0.964975	-0.799439	blue	Pav_sc0000843.1_g520.1.mk	0.964975	-0.904434	blue	Pav_sc0000257.1_g530.1.mk	0.955326	0.745603	pink	Pav_sc0010284.1_g010.1.mk	0.985629	0.868153	turquoise
novel.503	0.952007	0.907755	pink	novel.482	0.984887	0.899672	turquoise	Pav_sc0002858.1_g040.1.mk	0.963959	-0.713094	blue	Pav_sc0002858.1_g040.1.mk	0.963959	-0.830476	blue	novel.503	0.952007	0.861662	pink	novel.482	0.984887	0.836535	turquoise
Pav_sc0000869.1_g440.1.mk	0.950926	0.811501	pink	Pav_sc0000661.1_g070.1.mk	0.984457	0.846839	turquoise	Pav_sc0001218.1_g020.1.mk	0.963857	-0.827386	blue	Pav_sc0001218.1_g020.1.mk	0.963857	-0.903266	blue	Pav_sc0000869.1_g440.1.mk	0.950926	0.804427	pink	Pav_sc0000661.1_g070.1.mk	0.984457	0.764856	turquoise
Pav_sc0001405.1_g1060.1.mk	0.947365	0.879768	pink	Pav_sc0000909.1_g330.1.mk	0.983956	0.885371	turquoise	Pav_sc0000257.1_g890.1.mk	0.963367	-0.715028	blue	Pav_sc0000257.1_g890.1.mk	0.963367	-0.820843	blue	Pav_sc0001405.1_g1060.1.mk	0.947365	0.764725	pink	Pav_sc0000909.1_g330.1.mk	0.983956	0.825512	turquoise
Pav_sc0000625.1_g060.1.mk	0.94667	0.782008	pink	Pav_sc0000044.1_g420.1.mk	0.98344	0.920662	turquoise	Pav_sc0006882.1_g010.1.mk	0.961483	-0.701028	blue	Pav_sc0006882.1_g010.1.mk	0.961483	-0.830794	blue	Pav_sc0000625.1_g060.1.mk	0.94667	0.764673	pink	Pav_sc0000044.1_g420.1.mk	0.98344	0.862516	turquoise
Pav_sc0000359.1_g390.1.mk	0.94058	0.901469	pink	Pav_sc0000375.1_g100.1.mk	0.983316	0.851956	turquoise	Pav_sc0000071.1_g120.1.mk	0.961393	-0.746743	blue	Pav_sc0000071.1_g120.1.mk	0.961393	-0.873736	blue	Pav_sc0000359.1_g390.1.mk	0.94058	0.855285	pink	Pav_sc0000375.1_g100.1.mk	0.983316	0.769635	turquoise
Pav_sc0000877.1_g920.1.mk	0.940082	0.734491	pink	Pav_sc0000464.1_g390.1.mk	0.982822	0.890993	turquoise	Pav_sc0000467.1_g100.1.mk	0.961299	-0.721745	blue	Pav_sc0000467.1_g100.1.mk	0.961299	-0.853585	blue	Pav_sc0000877.1_g920.1.mk	0.940082	0.676224	pink	Pav_sc0000464.1_g390.1.mk	0.982822	0.828851	turquoise
Pav_sc0000333.1_g190.1.mk	0.933221	0.867406	pink	Pav_sc0001080.1_g580.1.mk	0.98254	0.918816	turquoise	Pav_sc0000793.1_g050.1.mk	0.960591	-0.740936	blue	Pav_sc0000793.1_g050.1.mk	0.960591	-0.862033	blue	Pav_sc0000333.1_g190.1.mk	0.933221	0.848931	pink	Pav_sc0001080.1_g580.1.mk	0.98254	0.820089	turquoise
Pav_sc0000119.1_g160.1.mk	0.926028	0.723274	pink	Pav_sc0000129.1_g1230.1.mk	0.982212	0.924059	turquoise	Pav_sc0000063.1_g130.1.mk	0.960056	-0.744493	blue	Pav_sc0000063.1_g130.1.mk	0.960056	-0.863564	blue	Pav_sc0000119.1_g160.1.mk	0.926028	0.65072	pink	Pav_sc0000129.1_g1230.1.mk	0.982212	0.848972	turquoise
Pav_sc0001309.1_g1270.1.mk	0.925517	0.947977	pink	Pav_sc0000554.1_g1520.1.mk	0.982195	0.902687	turquoise	Pav_sc0000268.1_g240.1.br	0.959047	-0.759998	blue	Pav_sc0000268.1_g240.1.br	0.959047	-0.870938	blue	Pav_sc0001309.1_g1270.1.mk	0.925517	0.845008	pink	Pav_sc0000554.1_g1520.1.mk	0.982195	0.852937	turquoise
Pav_sc0002208.1_g790.1.mk	0.924941	0.693023	pink	Pav_sc0000103.1_g970.1.mk	0.981713	0.851671	turquoise	Pav_sc0002828.1_g040.1.mk	0.958728	-0.784944	blue	Pav_sc0002828.1_g040.1.mk	0.958728	-0.890642	blue	Pav_sc0002208.1_g790.1.mk	0.924941	0.603152	pink	Pav_sc0000103.1_g970.1.mk	0.981713	0.785958	turquoise
Pav_sc0002479.1_g160.1.br	0.922209	0.903581	pink	Pav_sc0000229.1_g070.1.mk	0.981499	0.890906	turquoise	Pav_sc0000861.1_g030.1.mk	0.957952	-0.784428	blue	Pav_sc0000861.1_g030.1.mk	0.957952	-0.87074	blue	Pav_sc0002479.1_g160.1.br	0.922209	0.913461	pink	Pav_sc0000229.1_g070.1.mk	0.981499	0.82819	turquoise
Pav_sc0000377.1_g340.1.mk	0.921526	0.966948	pink	Pav_sc0007323.1_g020.1.br	0.981474	0.845971	turquoise	Pav_sc0001613.1_g400.1.mk	0.95784	-0.686846	blue	Pav_sc0001613.1_g400.1.mk	0.95784	-0.819017	blue	Pav_sc0000377.1_g340.1.mk	0.921526	0.96265	pink	Pav_sc0007323.1_g020.1.br	0.981474	0.773198	turquoise
Pav_sc0004901.1_g010.1.mk	0.920264	0.845616	pink	Pav_sc0000525.1_g510.1.mk	0.980144	0.944902	turquoise	Pav_sc0000557.1_g1080.1.mk	0.957786	-0.692382	blue	Pav_sc0000557.1_g1080.1.mk	0.957786	-0.823387	blue	Pav_sc0004901.1_g010.1.mk	0.920264	0.851985	pink	Pav_sc0000525.1_g510.1.mk	0.980144	0.855828	turquoise
Pav_sc0000143.1_g530.1.mk	0.919322	0.87456	pink	Pav_sc0000293.1_g420.1.mk	0.97943	0.878031	turquoise	Pav_sc0000015.1_g280.1.mk	0.956732	-0.70793	blue	Pav_sc0000015.1_g280.1.mk	0.956732	-0.82503	blue	Pav_sc0000143.1_g530.1.mk	0.919322	0.783206	pink	Pav_sc0000293.1_g420.1.mk	0.97943	0.80563	turquoise
Pav_sc0000877.1_g1260.1.mk	0.915005	0.859073	pink	Pav_sc0000044.1_g340.1.mk	0.979338	0.91448	turquoise	Pav_sc0000176.1_g180.1.mk	0.956675	-0.827721	blue	Pav_sc0000176.1_g180.1.mk	0.956675	-0.901943	blue	Pav_sc0000877.1_g1260.1.mk	0.915005	0.860521	pink	Pav_sc0000044.1_g340.1.mk	0.979338	0.86551	turquoise
Pav_sc0002060.1_g260.1.mk	0.904481	0.815847	pink	Pav_sc0000451.1_g060.1.mk	0.978196	0.888054	turquoise	Pav_sc0000216.1_g200.1.mk	0.956314	-0.686899	blue	Pav_sc0000216.1_g200.1.mk	0.956314	-0.82107	blue	Pav_sc0002060.1_g260.1.mk	0.904481	0.82935	pink	Pav_sc0000451.1_g060.1.mk	0.978196	0.842924	turquoise
Pav_sc0002942.1_g040.1.br	0.899335	0.853894	pink	Pav_sc0000638.1_g500.1.mk	0.978179	0.922738	turquoise	Pav_sc0000354.1_g500.1.mk	0.955781	-0.688321	blue	Pav_sc0000354.1_g500.1.mk	0.955781	-0.793198	blue	Pav_sc0002942.1_g040.1.br	0.899335	0.872758	pink	Pav_sc0000638.1_g500.1.mk	0.978179	0.875653	turquoise
Pav_sc0000207.1_g530.1.mk	0.897969	0.904853	pink	Pav_sc0000370.1_g370.1.mk	0.977465	0.873273	turquoise	Pav_sc0001203.1_g140.1.mk	0.955629	-0.722677	blue	Pav_sc0001203.1_g140.1.mk	0.955629	-0.840081	blue	Pav_sc0000207.1_g530.1.mk	0.897969	0.871679	pink	Pav_sc0000370.1_g370.1.mk	0.977465	0.79128	turquoise
Pav_sc0000700.1_g720.1.mk	0.89688	0.9831	pink	Pav_sc0001191.1_g220.1.mk	0.977456	0.908349	turquoise	Pav_sc0000615.1_g060.1.mk	0.95494	-0.693926	blue	Pav_sc0000615.1_g060.1.mk	0.95494	-0.818223	blue	Pav_sc0000700.1_g720.1.mk	0.89688	0.914929	pink	Pav_sc0001191.1_g220.1.mk	0.977456	0.86174	turquoise
Pav_sc0002318.1_g090.1.mk	0.893783	0.859171	pink	Pav_sc0000138.1_g790.1.mk	0.976902	0.839192	turquoise	Pav_sc0001084.1_g080.1.mk	0.95448	-0.773126	blue	Pav_sc0001084.1_g080.1.mk	0.95448	-0.881992	blue	Pav_sc0002318.1_g090.1.mk	0.893783	0.834188	pink	Pav_sc0000138.1_g790.1.mk	0.976902	0.751851	turquoise
Pav_sc0000333.1_g130.1.mk	0.887745	0.829498	pink	Pav_sc0000586.1_g100.1.mk	0.976823	0.832921	turquoise	Pav_sc0000062.1_g600.1.mk	0.954308	-0.771573	blue	Pav_sc0000062.1_g600.1.mk	0.954308	-0.858939	blue	Pav_sc0000333.1_g130.1.mk	0.887745	0.742895	pink	Pav_sc0000586.1_g100.1.mk	0.976823	0.761766	turquoise
Pav_sc0000497.1_g230.1.mk	0.887364	0.926301	pink	Pav_sc0000598.1_g540.1.mk	0.976229	0.834236	turquoise	Pav_sc0000062.1_g440.1.mk	0.953668	-0.746814	blue	Pav_sc0000062.1_g440.1.mk	0.953668	-0.856529	blue	Pav_sc0000497.1_g230.1.mk	0.887364	0.907968	pink	Pav_sc0000598.1_g540.1.mk	0.976229	0.761815	turquoise
Pav_sc0001422.1_g080.1.mk	0.887186	0.869085	pink	Pav_sc0003135.1_g040.1.mk	0.9759	0.922371	turquoise	Pav_sc0000702.1_g390.1.mk	0.95354	-0.648873	blue	Pav_sc0000702.1_g390.1.mk	0.95354	-0.795657	blue	Pav_sc0001422.1_g080.1.mk	0.887186	0.861243	pink	Pav_sc0003135.1_g040.1.mk	0.9759	0.875467	turquoise
Pav_sc0001583.1_g410.1.mk	0.881859	0.759454	pink	Pav_sc0002141.1_g090.1.mk	0.975747	0.910215	turquoise	novel.559	0.953156	-0.718404	blue	novel.559	0.953156	-0.832571	blue	Pav_sc0001583.1_g410.1.mk	0.881859	0.760269	pink	Pav_sc0002141.1_g090.1.mk	0.975747	0.813394	turquoise
Pav_sc0000243.1_g170.1.mk	0.842017	0.770993	pink	Pav_sc0000484.1_g580.1.mk	0.975485	0.923083	turquoise	Pav_sc0000744.1_g520.1.mk	0.953131	-0.658314	blue	Pav_sc0000744.1_g520.1.mk	0.953131	-0.803022	blue	Pav_sc0000243.1_g170.1.mk	0.842017	0.736969	pink	Pav_sc0000484.1_g580.1.mk	0.975485	0.866433	turquoise
Pav_sc0000704.1_g180.1.mk	0.835827	0.712779	pink	Pav_sc0002206.1_g320.1.mk	0.975404	0.882751	turquoise	Pav_sc0006999.1_g020.1.mk	0.953017	-0.764029	blue	Pav_sc0006999.1_g020.1.mk	0.953017	-0.87774	blue	Pav_sc0000704.1_g180.1.mk	0.835827	0.675352	pink	Pav_sc0002206.1_g320.1.mk	0.975404	0.828796	turquoise
Pav_sc0000558.1_g290.1.mk	0.823038	0.642822	pink	Pav_sc0000071.1_g490.1.mk	0.975281	0.848488	turquoise	Pav_sc0000257.1_g1060.1.mk	0.952404	-0.737325	blue	Pav_sc0000257.1_g1060.1.mk	0.952404	-0.858019	blue	Pav_sc0000558.1_g290.1.mk	0.823038	0.591688	pink	Pav_sc0000071.1_g490.1.mk	0.975281	0.772018	turquoise
Pav_sc0000009.1_g810.1.mk	0.821627	0.750758	pink	Pav_sc0000091.1_g170.1.mk	0.975034	0.825519	turquoise	Pav_sc0001797.1_g650.1.mk	0.951931	-0.825458	blue	Pav_sc0001797.1_g650.1.mk	0.951931	-0.885893	blue	Pav_sc0000009.1_g810.1.mk	0.821627	0.745522	pink	Pav_sc0000091.1_g170.1.mk	0.975034	0.75882	turquoise
Pav_sc0000481.1_g210.1.mk	0.819138	0.603871	pink	novel.1155	0.974483	0.844258	turquoise	Pav_sc0000370.1_g920.1.mk	0.950429	-0.804426	blue	Pav_sc0000370.1_g920.1.mk	0.950429	-0.873224	blue	Pav_sc0000481.1_g210.1.mk	0.819138	0.5906	pink	novel.1155	0.974483	0.789468	turquoise
Pav_sc0000843.1_g900.1.mk	0.810413	0.694796	pink	Pav_sc0012645.1_g020.1.mk	0.974327	0.905876	turquoise	Pav_sc0000598.1_g230.1.mk	0.949921	-0.666631	blue	Pav_sc0000598.1_g230.1.mk	0.949921	-0.810379	blue	Pav_sc0000843.1_g900.1.mk	0.810413	0.582502	pink	Pav_sc0012645.1_g020.1.mk	0.974327	0.873479	turquoise
Pav_sc0002208.1_g580.1.mk	0.787352	0.513517	pink	Pav_sc0000671.1_g230.1.mk	0.974314	0.919244	turquoise	Pav_sc0000212.1_g1140.1.mk	0.949821	-0.684367	blue	Pav_sc0000212.1_g1140.1.mk	0.949821	-0.805627	blue	Pav_sc0002208.1_g580.1.mk	0.787352	0.419962	pink	Pav_sc0000671.1_g230.1.mk	0.974314	0.855598	turquoise
Pav_sc0001405.1_g720.1.mk	0.781721	0.567266	pink	novel.603	0.974142	0.878262	turquoise	Pav_sc0001027.1_g090.1.mk	0.94982	-0.688652	blue	Pav_sc0001027.1_g090.1.mk	0.94982	-0.809867	blue	Pav_sc0001405.1_g720.1.mk	0.781721	0.495233	pink	novel.603	0.974142	0.783261	turquoise
Pav_sc0000506.1_g280.1.mk	0.76298	0.62592	pink	Pav_sc0000764.1_g150.1.mk	0.97371	0.883684	turquoise	Pav_sc0001518.1_g670.1.mk	0.94946	-0.675129	blue	Pav_sc0001518.1_g670.1.mk	0.94946	-0.80961	blue	Pav_sc0000506.1_g280.1.mk	0.76298	0.605289	pink	Pav_sc0000764.1_g150.1.mk	0.97371	0.849047	turquoise
Pav_sc0000545.1_g110.1.mk	0.756928	0.611142	pink	Pav_sc0001296.1_g330.1.mk	0.973155	0.816693	turquoise	Pav_sc0001323.1_g800.1.mk	0.949315	-0.684625	blue	Pav_sc0001323.1_g800.1.mk	0.949315	-0.789552	blue	Pav_sc0000545.1_g110.1.mk	0.756928	0.567608	pink	Pav_sc0001296.1_g330.1.mk	0.973155	0.741721	turquoise
Pav_sc0002060.1_g060.1.mk	0.756782	0.680219	pink	Pav_sc0000027.1_g040.1.mk	0.973068	0.879035	turquoise	Pav_sc0000482.1_g240.1.mk	0.948021	-0.790791	blue	Pav_sc0000482.1_g240.1.mk	0.948021	-0.869968	blue	Pav_sc0002060.1_g060.1.mk	0.756782	0.53161	pink	Pav_sc0000027.1_g040.1.mk	0.973068	0.784737	turquoise
Pav_sc0000754.1_g210.1.mk	0.751232	0.551273	pink	Pav_sc0002327.1_g080.1.mk	0.972895	0.854138	turquoise	Pav_sc0005746.1_g090.1.mk	0.947755	-0.656604	blue	Pav_sc0005746.1_g090.1.mk	0.947755	-0.798984	blue	Pav_sc0000754.1_g210.1.mk	0.751232	0.469462	pink	Pav_sc0002327.1_g080.1.mk	0.972895	0.815519	turquoise
Pav_sc0001181.1_g160.1.mk	0.72938	0.515026	pink	Pav_sc0000648.1_g240.1.mk	0.972698	0.866453	turquoise	Pav_sc0000554.1_g370.1.mk	0.947033	-0.726253	blue	Pav_sc0000554.1_g370.1.mk	0.947033	-0.830093	blue	Pav_sc0001181.1_g160.1.mk	0.72938	0.503484	pink	Pav_sc0000648.1_g240.1.mk	0.972698	0.839325	turquoise
Pav_sc0000600.1_g890.1.mk	0.711218	0.461699	pink	Pav_sc0007753.1_g010.1.br	0.972675	0.832427	turquoise	Pav_sc0000449.1_g400.1.mk	0.946867	-0.78466	blue	Pav_sc0000449.1_g400.1.mk	0.946867	-0.863059	blue	Pav_sc0000600.1_g890.1.mk	0.711218	0.404242	pink	Pav_sc0007753.1_g010.1.br	0.972675	0.756154	turquoise
Pav_sc0004628.1_g040.1.br	0.68851	0.500815	pink	Pav_sc0000212.1_g140.1.mk	0.972629	0.920278	turquoise	Pav_sc0000383.1_g1000.1.mk	0.946407	-0.687768	blue	Pav_sc0000383.1_g1000.1.mk	0.946407	-0.816272	blue	Pav_sc0004628.1_g040.1.br	0.68851	0.425304	pink	Pav_sc0000212.1_g140.1.mk	0.972629	0.847045	turquoise
Pav_co4066955.1_g010.1.mk	0.67646	0.388243	pink	Pav_sc0000244.1_g050.1.mk	0.971552	0.819932	turquoise	Pav_sc0001205.1_g130.1.mk	0.945954	-0.622676	blue	Pav_sc0001205.1_g130.1.mk	0.945954	-0.768299	blue	Pav_co4066955.1_g010.1.mk	0.67646	0.293688	pink	Pav_sc0000244.1_g050.1.mk	0.971552	0.735262	turquoise
Pav_sc0000396.1_g810.1.mk	0.647046	0.486103	pink	Pav_sc0000535.1_g300.1.mk	0.971149	0.910471	turquoise	Pav_sc0002360.1_g600.1.mk	0.94568	-0.822901	blue	Pav_sc0002360.1_g600.1.mk	0.94568	-0.912349	blue	Pav_sc0000396.1_g810.1.mk	0.647046	0.400506	pink	Pav_sc0000535.1_g300.1.mk	0.971149	0.814577	turquoise
Pav_sc0002327.1_g760.1.mk	0.635317	0.460116	pink	novel.1049	0.970951	0.924465	turquoise	Pav_sc0000780.1_g100.1.mk	0.9451	-0.83726	blue	Pav_sc0000780.1_g100.1.mk	0.9451	-0.912819	blue	Pav_sc0002327.1_g760.1.mk	0.635317	0.498081	pink	novel.1049	0.970951	0.894442	turquoise
Pav_sc0000071.1_g820.1.mk	0.628921	0.316441	pink	Pav_sc0000484.1_g740.1.mk	0.970861	0.881915	turquoise	Pav_sc0000866.1_g280.1.mk	0.944544	-0.757139	blue	Pav_sc0000866.1_g280.1.mk	0.944544	-0.86557	blue	Pav_sc0000071.1_g820.1.mk	0.628921	0.32773	pink	Pav_sc0000484.1_g740.1.mk	0.970861	0.851518	turquoise
Pav_sc0000054.1_g130.1.mk	0.581297	0.388493	pink	Pav_sc0002250.1_g070.1.mk	0.970521	0.812546	turquoise	Pav_sc0001323.1_g340.1.mk	0.944342	-0.670118	blue	Pav_sc0001323.1_g340.1.mk	0.944342	-0.805098	blue	Pav_sc0000054.1_g130.1.mk	0.581297	0.267328	pink	Pav_sc0002250.1_g070.1.mk	0.970521	0.757202	turquoise
Pav_sc0001580.1_g300.1.mk	0.556213	0.363224	pink	Pav_sc0002285.1_g060.1.mk	0.970466	0.830549	turquoise	Pav_sc0000503.1_g600.1.mk	0.944268	-0.730915	blue	Pav_sc0000503.1_g600.1.mk	0.944268	-0.851001	blue	Pav_sc0001580.1_g300.1.mk	0.556213	0.292247	pink	Pav_sc0002285.1_g060.1.mk	0.970466	0.752915	turquoise
Pav_sc0001003.1_g100.1.mk	0.539201	0.41274	pink	Pav_sc0000311.1_g140.1.mk	0.970465	0.87199	turquoise	Pav_co4072069.1_g010.1.mk	0.944166	-0.689459	blue	Pav_co4072069.1_g010.1.mk	0.944166	-0.809971	blue	Pav_sc0001003.1_g100.1.mk	0.539201	0.330325	pink	Pav_sc0000311.1_g140.1.mk	0.970465	0.816046	turquoise
Pav_sc0001110.1_g160.1.mk	0.520219	0.376898	pink	Pav_sc0001102.1_g250.1.mk	0.97022	0.885332	turquoise	Pav_sc0000915.1_g160.1.mk	0.943768	-0.586802	blue	Pav_sc0000915.1_g160.1.mk	0.943768	-0.735594	blue	Pav_sc0001110.1_g160.1.mk	0.520219	0.306069	pink	Pav_sc0001102.1_g250.1.mk	0.97022	0.85799	turquoise
Pav_sc0005078.1_g040.1.mk	0.515668	0.303085	pink	Pav_sc0001488.1_g330.1.mk	0.96985	0.849838	turquoise	Pav_sc0000031.1_g030.1.mk	0.943712	-0.675203	blue	Pav_sc0000031.1_g030.1.mk	0.943712	-0.795812	blue	Pav_sc0005078.1_g040.1.mk	0.515668	0.324594	pink	Pav_sc0001488.1_g330.1.mk	0.96985	0.800894	turquoise
				Pav_sc0000848.1_g020.1.mk	0.9697	0.861575	turquoise	Pav_sc0000412.1_g320.1.mk	-0.9437	0.776915	blue	Pav_sc0000412.1_g320.1.mk	-0.9437	0.851832	blue					Pav_sc0000848.1_g020.1.mk	0.9697	0.812208	turquoise
				Pav_sc0000062.1_g490.1.mk	0.969296	0.853982	turquoise	Pav_sc0003744.1_g140.1.mk	0.943214	-0.709052	blue	Pav_sc0003744.1_g140.1.mk	0.943214	-0.791839	blue					Pav_sc0000062.1_g490.1.mk	0.969296	0.827741	turquoise
				Pav_sc0000099.1_g680.1.mk	0.969043	0.881837	turquoise	Pav_sc0000131.1_g370.1.mk	0.942901	-0.83582	blue	Pav_sc0000131.1_g370.1.mk	0.942901	-0.924174	blue					Pav_sc0000099.1_g680.1.mk	0.969043	0.856804	turquoise
				Pav_sc0001107.1_g110.1.mk	0.968819	0.809978	turquoise	Pav_sc0004026.1_g030.1.mk	0.941798	-0.776947	blue	Pav_sc0004026.1_g030.1.mk	0.941798	-0.868281	blue					Pav_sc0001107.1_g110.1.mk	0.968819	0.745177	turquoise
				Pav_sc0000175.1_g160.1.mk	0.968436	0.936155	turquoise	Pav_sc0000229.1_g150.1.mk	0.94155	-0.672199	blue	Pav_sc0000229.1_g150.1.mk	0.94155	-0.796218	blue					Pav_sc0000175.1_g160.1.mk	0.968436	0.878627	turquoise
				Pav_sc0000890.1_g870.1.mk	0.968019	0.839862	turquoise	Pav_sc0000308.1_g280.1.mk	0.941535	-0.622608	blue	Pav_sc0000308.1_g280.1.mk	0.941535	-0.772201	blue					Pav_sc0000890.1_g870.1.mk	0.968019	0.765556	turquoise
				Pav_sc0000245.1_g150.1.mk	0.967261	0.800131	turquoise	Pav_sc0001540.1_g480.1.mk	0.941123	-0.850007	blue	Pav_sc0001540.1_g480.1.mk	0.941123	-0.893772	blue					Pav_sc0000245.1_g150.1.mk	0.967261	0.727482	turquoise
				Pav_sc0001932.1_g120.1.mk	0.967212	0.923063	turquoise	Pav_sc0000852.1_g770.1.mk	0.940745	-0.668057	blue	Pav_sc0000852.1_g770.1.mk	0.940745	-0.801653	blue					Pav_sc0001932.1_g120.1.mk	0.967212	0.820026	turquoise
				novel.75	0.966933	0.863502	turquoise	Pav_sc0000893.1_g390.1.mk	0.940737	-0.806289	blue	Pav_sc0000893.1_g390.1.mk	0.940737	-0.894812	blue					novel.75	0.966933	0.775727	turquoise
				Pav_sc0001405.1_g1400.1.mk	0.966753	0.873388	turquoise	Pav_sc0000491.1_g1140.1.mk	0.940186	-0.845982	blue	Pav_sc0000491.1_g1140.1.mk	0.940186	-0.92482	blue					Pav_sc0001405.1_g1400.1.mk	0.966753	0.811872	turquoise
				Pav_sc0002230.1_g130.1.br	0.966686	0.800074	turquoise	Pav_sc0003478.1_g050.1.mk	0.939155	-0.796874	blue	Pav_sc0003478.1_g050.1.mk	0.939155	-0.872721	blue					Pav_sc0002230.1_g130.1.br	0.966686	0.718146	turquoise
				Pav_sc0000652.1_g820.1.mk	0.966464	0.818362	turquoise	Pav_sc0000431.1_g460.1.mk	0.938749	-0.724868	blue	Pav_sc0000431.1_g460.1.mk	0.938749	-0.843436	blue					Pav_sc0000652.1_g820.1.mk	0.966464	0.771102	turquoise
				Pav_sc0000764.1_g380.1.mk	0.966403	0.903353	turquoise	Pav_sc0001479.1_g190.1.mk	0.938662	-0.77613	blue	Pav_sc0001479.1_g190.1.mk	0.938662	-0.878715	blue					Pav_sc0000764.1_g380.1.mk	0.966403	0.878457	turquoise
				Pav_sc0001812.1_g030.1.br	0.965741	0.836542	turquoise	Pav_sc0001413.1_g350.1.mk	0.938558	-0.820942	blue	Pav_sc0001413.1_g350.1.mk	0.938558	-0.902272	blue					Pav_sc0001812.1_g030.1.br	0.965741	0.739562	turquoise
				Pav_sc0000754.1_g700.1.mk	0.965376	0.85013	turquoise	Pav_sc0000131.1_g130.1.mk	0.938341	-0.714916	blue	Pav_sc0000131.1_g130.1.mk	0.938341	-0.826982	blue					Pav_sc0000754.1_g700.1.mk	0.965376	0.762724	turquoise
				Pav_sc0000063.1_g120.1.mk	0.965321	0.858848	turquoise	Pav_sc0000168.1_g030.1.mk	0.938252	-0.659036	blue	Pav_sc0000168.1_g030.1.mk	0.938252	-0.794218	blue					Pav_sc0000063.1_g120.1.mk	0.965321	0.832229	turquoise
				Pav_sc0001124.1_g250.1.mk	0.965223	0.813791	turquoise	Pav_sc0000813.1_g270.1.mk	0.936656	-0.693562	blue	Pav_sc0000813.1_g270.1.mk	0.936656	-0.800642	blue					Pav_sc0001124.1_g250.1.mk	0.965223	0.736012	turquoise
				Pav_sc0000148.1_g610.1.br	0.965148	0.868264	turquoise	Pav_sc0000129.1_g1490.1.mk	-0.936522	0.867191	blue	Pav_sc0000129.1_g1490.1.mk	-0.936522	0.930052	blue					Pav_sc0000148.1_g610.1.br	0.965148	0.813989	turquoise
				Pav_sc0001836.1_g130.1.br	0.965145	0.824505	turquoise	Pav_sc0000044.1_g250.1.mk	0.93623	-0.84994	blue	Pav_sc0000044.1_g250.1.mk	0.93623	-0.934269	blue					Pav_sc0001836.1_g130.1.br	0.965145	0.756323	turquoise
				Pav_sc0001341.1_g100.1.mk	0.965004	0.906006	turquoise	Pav_sc0002441.1_g060.1.mk	-0.934845	0.893178	blue	Pav_sc0002441.1_g060.1.mk	-0.934845	0.943495	blue					Pav_sc0001341.1_g100.1.mk	0.965004	0.812927	turquoise
				Pav_sc0000220.1_g1580.1.mk	0.964937	0.816962	turquoise	Pav_sc0003065.1_g120.1.mk	0.934547	-0.759698	blue	Pav_sc0003065.1_g120.1.mk	0.934547	-0.846938	blue					Pav_sc0000220.1_g1580.1.mk	0.964937	0.741029	turquoise
				Pav_sc0004383.1_g040.1.br	0.96459	0.811337	turquoise	Pav_sc0000138.1_g470.1.mk	0.934386	-0.639126	blue	Pav_sc0000138.1_g470.1.mk	0.934386	-0.792565	blue					Pav_sc0004383.1_g040.1.br	0.96459	0.766761	turquoise
				Pav_sc0001196.1_g1000.1.mk	0.964537	0.857043	turquoise	Pav_sc0000129.1_g1920.1.mk	0.934217	-0.726877	blue	Pav_sc0000129.1_g1920.1.mk	0.934217	-0.850848	blue					Pav_sc0001196.1_g1000.1.mk	0.964537	0.772376	turquoise
				Pav_sc0001582.1_g280.1.mk	0.964501	0.843058	turquoise	Pav_sc0001015.1_g110.1.mk	0.934103	-0.74647	blue	Pav_sc0001015.1_g110.1.mk	0.934103	-0.828434	blue					Pav_sc0001582.1_g280.1.mk	0.964501	0.759634	turquoise
				novel.595	0.964112	0.861705	turquoise	Pav_sc0000348.1_g1060.1.mk	0.934056	-0.665894	blue	Pav_sc0000348.1_g1060.1.mk	0.934056	-0.784756	blue					novel.595	0.964112	0.787457	turquoise
				Pav_sc0001869.1_g810.1.mk	0.963939	0.92004	turquoise	Pav_sc0000184.1_g550.1.mk	0.933939	-0.791735	blue	Pav_sc0000184.1_g550.1.mk	0.933939	-0.845431	blue					Pav_sc0001869.1_g810.1.mk	0.963939	0.850426	turquoise
				Pav_sc0000754.1_g410.1.mk	0.963873	0.800619	turquoise	Pav_sc0002862.1_g500.1.mk	0.933701	-0.647232	blue	Pav_sc0002862.1_g500.1.mk	0.933701	-0.76872	blue					Pav_sc0000754.1_g410.1.mk	0.963873	0.723223	turquoise
				Pav_sc0000704.1_g560.1.mk	0.963579	0.88871	turquoise	Pav_sc0000196.1_g090.1.mk	-0.933688	0.737567	blue	Pav_sc0000196.1_g090.1.mk	-0.933688	0.829284	blue					Pav_sc0000704.1_g560.1.mk	0.963579	0.873425	turquoise
				Pav_sc0004531.1_g040.1.mk	0.963501	0.799147	turquoise	Pav_sc0006664.1_g010.1.mk	0.933299	-0.601698	blue	Pav_sc0006664.1_g010.1.mk	0.933299	-0.749931	blue					Pav_sc0004531.1_g040.1.mk	0.963501	0.714152	turquoise
				Pav_sc0000488.1_g560.1.mk	0.963454	0.835707	turquoise	Pav_sc0003813.1_g100.1.mk	0.93326	-0.80054	blue	Pav_sc0003813.1_g100.1.mk	0.93326	-0.883448	blue					Pav_sc0000488.1_g560.1.mk	0.963454	0.793794	turquoise
				Pav_sc0001243.1_g040.1.mk	0.963014	0.839498	turquoise	Pav_sc0000254.1_g1310.1.br	0.932726	-0.739101	blue	Pav_sc0000254.1_g1310.1.br	0.932726	-0.85345	blue					Pav_sc0001243.1_g040.1.mk	0.963014	0.796616	turquoise
				Pav_sc0000653.1_g040.1.mk	0.962752	0.792024	turquoise	Pav_sc0000540.1_g200.1.mk	-0.932331	0.743925	blue	Pav_sc0000540.1_g200.1.mk	-0.932331	0.835622	blue					Pav_sc0000653.1_g040.1.mk	0.962752	0.711783	turquoise
				Pav_sc0002009.1_g310.1.mk	0.962682	0.86346	turquoise	Pav_sc0000212.1_g560.1.mk	0.931901	-0.75047	blue	Pav_sc0000212.1_g560.1.mk	0.931901	-0.852937	blue					Pav_sc0002009.1_g310.1.mk	0.962682	0.755228	turquoise
				Pav_sc0000138.1_g050.1.mk	0.9626	0.842872	turquoise	novel.257	0.931823	-0.725503	blue	novel.257	0.931823	-0.857975	blue					Pav_sc0000138.1_g050.1.mk	0.9626	0.796465	turquoise
				Pav_sc0001335.1_g260.1.mk	0.962466	0.914103	turquoise	Pav_sc0002342.1_g080.1.mk	0.93124	-0.722999	blue	Pav_sc0002342.1_g080.1.mk	0.93124	-0.803359	blue					Pav_sc0001335.1_g260.1.mk	0.962466	0.90006	turquoise
				Pav_sc0000583.1_g1020.1.mk	0.962015	0.850463	turquoise	Pav_sc0006018.1_g050.1.mk	0.930908	-0.79219	blue	Pav_sc0006018.1_g050.1.mk	0.930908	-0.897189	blue					Pav_sc0000583.1_g1020.1.mk	0.962015	0.787993	turquoise
				Pav_sc0001502.1_g180.1.mk	0.96184	0.873111	turquoise	Pav_sc0001171.1_g390.1.mk	0.930074	-0.632615	blue	Pav_sc0001171.1_g390.1.mk	0.930074	-0.776009	blue					Pav_sc0001502.1_g180.1.mk	0.96184	0.847225	turquoise
				Pav_sc0000358.1_g160.1.mk	0.961569	0.820812	turquoise	Pav_sc0001309.1_g1380.1.mk	0.930047	-0.735411	blue	Pav_sc0001309.1_g1380.1.mk	0.930047	-0.842498	blue					Pav_sc0000358.1_g160.1.mk	0.961569	0.782877	turquoise
				Pav_sc0001258.1_g320.1.mk	0.961504	0.883709	turquoise	Pav_sc0000129.1_g950.1.mk	0.929723	-0.694683	blue	Pav_sc0000129.1_g950.1.mk	0.929723	-0.820062	blue					Pav_sc0001258.1_g320.1.mk	0.961504	0.818244	turquoise
				Pav_sc0001932.1_g160.1.mk	0.961474	0.810829	turquoise	Pav_sc0000373.1_g020.1.mk	0.929598	-0.603897	blue	Pav_sc0000373.1_g020.1.mk	0.929598	-0.750178	blue					Pav_sc0001932.1_g160.1.mk	0.961474	0.735299	turquoise
				Pav_sc0001181.1_g720.1.mk	0.961094	0.87572	turquoise	Pav_sc0000648.1_g270.1.mk	0.929346	-0.77674	blue	Pav_sc0000648.1_g270.1.mk	0.929346	-0.856147	blue					Pav_sc0001181.1_g720.1.mk	0.961094	0.823783	turquoise
				Pav_sc0002055.1_g300.1.mk	0.960746	0.846943	turquoise	Pav_sc0000754.1_g690.1.mk	0.928909	-0.664432	blue	Pav_sc0000754.1_g690.1.mk	0.928909	-0.795241	blue					Pav_sc0002055.1_g300.1.mk	0.960746	0.741184	turquoise
				Pav_sc0000383.1_g160.1.mk	0.960722	0.88809	turquoise	Pav_sc0001183.1_g390.1.mk	0.928764	-0.593925	blue	Pav_sc0001183.1_g390.1.mk	0.928764	-0.74009	blue					Pav_sc0000383.1_g160.1.mk	0.960722	0.816216	turquoise
				Pav_sc0000086.1_g130.1.mk	0.960498	0.912952	turquoise	Pav_sc0000099.1_g860.1.mk	0.928178	-0.796063	blue	Pav_sc0000099.1_g860.1.mk	0.928178	-0.84512	blue					Pav_sc0000086.1_g130.1.mk	0.960498	0.887277	turquoise
				Pav_sc0000174.1_g150.1.mk	0.960309	0.909535	turquoise	Pav_sc0000260.1_g280.1.mk	0.927572	-0.652535	blue	Pav_sc0000260.1_g280.1.mk	0.927572	-0.76948	blue					Pav_sc0000174.1_g150.1.mk	0.960309	0.861595	turquoise
				Pav_sc0000428.1_g690.1.mk	0.959977	0.780936	turquoise	Pav_sc0001797.1_g690.1.mk	0.927559	-0.624613	blue	Pav_sc0001797.1_g690.1.mk	0.927559	-0.746263	blue					Pav_sc0000428.1_g690.1.mk	0.959977	0.708619	turquoise
				Pav_sc0000557.1_g750.1.mk	0.959767	0.820858	turquoise	Pav_sc0003174.1_g070.1.mk	0.926998	-0.798188	blue	Pav_sc0003174.1_g070.1.mk	0.926998	-0.85925	blue					Pav_sc0000557.1_g750.1.mk	0.959767	0.782391	turquoise
				Pav_sc0007645.1_g030.1.mk	0.959659	0.809219	turquoise	Pav_sc0001724.1_g010.1.mk	0.926755	-0.766459	blue	Pav_sc0001724.1_g010.1.mk	0.926755	-0.869472	blue					Pav_sc0007645.1_g030.1.mk	0.959659	0.759628	turquoise
				Pav_sc0000824.1_g050.1.mk	0.959581	0.934225	turquoise	Pav_sc0001248.1_g040.1.mk	0.926245	-0.670616	blue	Pav_sc0001248.1_g040.1.mk	0.926245	-0.789014	blue					Pav_sc0000824.1_g050.1.mk	0.959581	0.913267	turquoise
				Pav_sc0000440.1_g290.1.mk	0.959472	0.809569	turquoise	Pav_sc0002589.1_g030.1.mk	0.925943	-0.820032	blue	Pav_sc0002589.1_g030.1.mk	0.925943	-0.902825	blue					Pav_sc0000440.1_g290.1.mk	0.959472	0.732333	turquoise
				Pav_sc0004151.1_g020.1.mk	0.959414	0.842098	turquoise	Pav_sc0002828.1_g610.1.mk	0.925475	-0.690463	blue	Pav_sc0002828.1_g610.1.mk	0.925475	-0.805047	blue					Pav_sc0004151.1_g020.1.mk	0.959414	0.823847	turquoise
				Pav_sc0004456.1_g030.1.mk	0.959275	0.808437	turquoise	Pav_sc0000358.1_g710.1.mk	0.925266	-0.770613	blue	Pav_sc0000358.1_g710.1.mk	0.925266	-0.847145	blue					Pav_sc0004456.1_g030.1.mk	0.959275	0.745254	turquoise
				Pav_sc0002198.1_g200.1.mk	0.959233	0.794488	turquoise	Pav_sc0000207.1_g1260.1.mk	0.925153	-0.621388	blue	Pav_sc0000207.1_g1260.1.mk	0.925153	-0.773859	blue					Pav_sc0002198.1_g200.1.mk	0.959233	0.731369	turquoise
				Pav_sc0000158.1_g130.1.mk	0.958971	0.889073	turquoise	Pav_sc0004354.1_g210.1.mk	0.9247	-0.76603	blue	Pav_sc0004354.1_g210.1.mk	0.9247	-0.853936	blue					Pav_sc0000158.1_g130.1.mk	0.958971	0.833143	turquoise
				Pav_sc0000744.1_g060.1.mk	0.958861	0.879846	turquoise	Pav_sc0000675.1_g1210.1.mk	0.924681	-0.712251	blue	Pav_sc0000675.1_g1210.1.mk	0.924681	-0.806814	blue					Pav_sc0000744.1_g060.1.mk	0.958861	0.780466	turquoise
				Pav_sc0000909.1_g500.1.mk	0.958653	0.933527	turquoise	Pav_sc0001242.1_g310.1.mk	0.923018	-0.621087	blue	Pav_sc0001242.1_g310.1.mk	0.923018	-0.748532	blue					Pav_sc0000909.1_g500.1.mk	0.958653	0.847921	turquoise
				Pav_sc0001461.1_g070.1.mk	0.958553	0.854782	turquoise	Pav_sc0001862.1_g310.1.mk	0.922789	-0.690384	blue	Pav_sc0001862.1_g310.1.mk	0.922789	-0.798397	blue					Pav_sc0001461.1_g070.1.mk	0.958553	0.826288	turquoise
				Pav_sc0000396.1_g1080.1.mk	0.958518	0.962879	turquoise	novel.461	-0.922474	0.759543	blue	novel.461	-0.922474	0.845885	blue					Pav_sc0000396.1_g1080.1.mk	0.958518	0.919003	turquoise
				Pav_sc0000910.1_g710.1.mk	0.958233	0.828133	turquoise	Pav_sc0000373.1_g290.1.mk	0.92246	-0.704309	blue	Pav_sc0000373.1_g290.1.mk	0.92246	-0.816313	blue					Pav_sc0000910.1_g710.1.mk	0.958233	0.770574	turquoise
				Pav_sc0001582.1_g250.1.mk	0.957901	0.908899	turquoise	Pav_sc0001191.1_g040.1.mk	-0.922159	0.878411	blue	Pav_sc0001191.1_g040.1.mk	-0.922159	0.931439	blue					Pav_sc0001582.1_g250.1.mk	0.957901	0.812411	turquoise
				Pav_sc0000157.1_g080.1.mk	0.957884	0.797812	turquoise	Pav_sc0000013.1_g110.1.mk	0.921853	-0.680958	blue	Pav_sc0000013.1_g110.1.mk	0.921853	-0.783922	blue					Pav_sc0000157.1_g080.1.mk	0.957884	0.726097	turquoise
				Pav_sc0000567.1_g1070.1.mk	0.957257	0.833652	turquoise	Pav_sc0000498.1_g020.1.mk	0.921707	-0.66671	blue	Pav_sc0000498.1_g020.1.mk	0.921707	-0.78948	blue					Pav_sc0000567.1_g1070.1.mk	0.957257	0.80798	turquoise
				Pav_sc0000027.1_g250.1.mk	0.957253	0.845583	turquoise	Pav_sc0000766.1_g280.1.mk	0.921528	-0.644767	blue	Pav_sc0000766.1_g280.1.mk	0.921528	-0.766888	blue					Pav_sc0000027.1_g250.1.mk	0.957253	0.794631	turquoise
				Pav_sc0000848.1_g140.1.mk	0.957057	0.796581	turquoise	Pav_co4008389.1_g010.1.mk	0.921271	-0.672918	blue	Pav_co4008389.1_g010.1.mk	0.921271	-0.790653	blue					Pav_sc0000848.1_g140.1.mk	0.957057	0.699491	turquoise
				Pav_sc0006080.1_g070.1.mk	0.957054	0.915416	turquoise	Pav_sc0000491.1_g720.1.mk	0.921072	-0.753649	blue	Pav_sc0000491.1_g720.1.mk	0.921072	-0.820786	blue					Pav_sc0006080.1_g070.1.mk	0.957054	0.864958	turquoise
				Pav_sc0002574.1_g190.1.mk	0.956988	0.840917	turquoise	Pav_sc0001203.1_g100.1.br	0.920862	-0.760657	blue	Pav_sc0001203.1_g100.1.br	0.920862	-0.848289	blue					Pav_sc0002574.1_g190.1.mk	0.956988	0.806088	turquoise
				Pav_sc0000549.1_g1220.1.mk	0.956961	0.797706	turquoise	Pav_sc0000598.1_g720.1.mk	0.920612	-0.588406	blue	Pav_sc0000598.1_g720.1.mk	0.920612	-0.729528	blue					Pav_sc0000549.1_g1220.1.mk	0.956961	0.767209	turquoise
				Pav_sc0000915.1_g120.1.br	0.956939	0.839236	turquoise	Pav_sc0000383.1_g100.1.mk	0.920525	-0.749894	blue	Pav_sc0000383.1_g100.1.mk	0.920525	-0.839103	blue					Pav_sc0000915.1_g120.1.br	0.956939	0.736343	turquoise
				Pav_sc0000893.1_g540.1.mk	0.956934	0.841032	turquoise	Pav_sc0000049.1_g070.1.mk	0.919396	-0.650783	blue	Pav_sc0000049.1_g070.1.mk	0.919396	-0.781887	blue					Pav_sc0000893.1_g540.1.mk	0.956934	0.816564	turquoise
				Pav_sc0001529.1_g170.1.mk	0.95691	0.791228	turquoise	Pav_sc0000720.1_g080.1.mk	0.919382	-0.591111	blue	Pav_sc0000720.1_g080.1.mk	0.919382	-0.701081	blue					Pav_sc0001529.1_g170.1.mk	0.95691	0.714541	turquoise
				Pav_sc0000979.1_g110.1.mk	0.956747	0.837788	turquoise	Pav_sc0001327.1_g020.1.br	0.91851	-0.811179	blue	Pav_sc0001327.1_g020.1.br	0.91851	-0.885031	blue					Pav_sc0000979.1_g110.1.mk	0.956747	0.736273	turquoise
				Pav_sc0002060.1_g030.1.br	0.956691	0.825183	turquoise	Pav_sc0002009.1_g080.1.mk	0.91848	-0.600041	blue	Pav_sc0002009.1_g080.1.mk	0.91848	-0.734766	blue					Pav_sc0002060.1_g030.1.br	0.956691	0.781405	turquoise
				Pav_sc0001405.1_g1930.1.mk	0.95661	0.795816	turquoise	Pav_sc0000467.1_g730.1.mk	0.918394	-0.586045	blue	Pav_sc0000467.1_g730.1.mk	0.918394	-0.733139	blue					Pav_sc0001405.1_g1930.1.mk	0.95661	0.715688	turquoise
				Pav_sc0000030.1_g060.1.mk	0.956595	0.84851	turquoise	Pav_sc0000764.1_g130.1.mk	0.918056	-0.587649	blue	Pav_sc0000764.1_g130.1.mk	0.918056	-0.730467	blue					Pav_sc0000030.1_g060.1.mk	0.956595	0.760775	turquoise
				Pav_sc0000652.1_g1030.1.mk	0.956543	0.863709	turquoise	Pav_sc0004456.1_g140.1.mk	0.91778	-0.757819	blue	Pav_sc0004456.1_g140.1.mk	0.91778	-0.838877	blue					Pav_sc0000652.1_g1030.1.mk	0.956543	0.772214	turquoise
				novel.1381	0.956322	0.787125	turquoise	Pav_sc0000467.1_g370.1.mk	0.917255	-0.590559	blue	Pav_sc0000467.1_g370.1.mk	0.917255	-0.735672	blue					novel.1381	0.956322	0.737102	turquoise
				Pav_sc0004923.1_g040.1.mk	0.955499	0.787901	turquoise	Pav_sc0000042.1_g450.1.mk	-0.917151	0.843878	blue	Pav_sc0000042.1_g450.1.mk	-0.917151	0.915032	blue					Pav_sc0004923.1_g040.1.mk	0.955499	0.70925	turquoise
				Pav_sc0000558.1_g460.1.mk	0.954811	0.789396	turquoise	Pav_sc0001405.1_g1050.1.mk	0.917009	-0.661137	blue	Pav_sc0001405.1_g1050.1.mk	0.917009	-0.762036	blue					Pav_sc0000558.1_g460.1.mk	0.954811	0.741003	turquoise
				Pav_sc0000729.1_g310.1.br	0.954769	0.78959	turquoise	Pav_sc0001059.1_g390.1.mk	0.916589	-0.611377	blue	Pav_sc0001059.1_g390.1.mk	0.916589	-0.762224	blue					Pav_sc0000729.1_g310.1.br	0.954769	0.705956	turquoise
				Pav_sc0000514.1_g310.1.mk	0.954659	0.950046	turquoise	Pav_sc0004290.1_g190.1.mk	0.916421	-0.816969	blue	Pav_sc0004290.1_g190.1.mk	0.916421	-0.89413	blue					Pav_sc0000514.1_g310.1.mk	0.954659	0.888046	turquoise
				Pav_sc0003850.1_g010.1.br	0.954631	0.84083	turquoise	Pav_sc0000431.1_g200.1.mk	0.916392	-0.765717	blue	Pav_sc0000431.1_g200.1.mk	0.916392	-0.840701	blue					Pav_sc0003850.1_g010.1.br	0.954631	0.791592	turquoise
				Pav_sc0001364.1_g060.1.mk	0.954474	0.898749	turquoise	Pav_sc0000370.1_g280.1.mk	0.915049	-0.708573	blue	Pav_sc0000370.1_g280.1.mk	0.915049	-0.832957	blue					Pav_sc0001364.1_g060.1.mk	0.954474	0.876934	turquoise
				Pav_sc0000206.1_g490.1.mk	0.954265	0.95872	turquoise	Pav_sc0001786.1_g160.1.mk	0.913883	-0.850035	blue	Pav_sc0001786.1_g160.1.mk	0.913883	-0.913845	blue					Pav_sc0000206.1_g490.1.mk	0.954265	0.933935	turquoise
				Pav_sc0000358.1_g200.1.mk	0.954197	0.897882	turquoise	Pav_sc0000113.1_g310.1.mk	0.913758	-0.734413	blue	Pav_sc0000113.1_g310.1.mk	0.913758	-0.846576	blue					Pav_sc0000358.1_g200.1.mk	0.954197	0.85394	turquoise
				Pav_sc0000649.1_g120.1.mk	0.954174	0.867186	turquoise	Pav_sc0000700.1_g1810.1.mk	0.913465	-0.740263	blue	Pav_sc0000700.1_g1810.1.mk	0.913465	-0.863584	blue					Pav_sc0000649.1_g120.1.mk	0.954174	0.78002	turquoise
				Pav_sc0000130.1_g270.1.mk	0.954108	0.780048	turquoise	Pav_sc0001518.1_g810.1.mk	0.913391	-0.820507	blue	Pav_sc0001518.1_g810.1.mk	0.913391	-0.86956	blue					Pav_sc0000130.1_g270.1.mk	0.954108	0.684588	turquoise
				novel.859	0.954095	0.905978	turquoise	novel.590	-0.913195	0.675703	blue	novel.590	-0.913195	0.763201	blue					novel.859	0.954095	0.83697	turquoise
				Pav_sc0000055.1_g490.1.mk	0.953915	0.811352	turquoise	Pav_sc0000091.1_g390.1.mk	0.912932	-0.646875	blue	Pav_sc0000091.1_g390.1.mk	0.912932	-0.766039	blue					Pav_sc0000055.1_g490.1.mk	0.953915	0.744778	turquoise
				Pav_sc0000363.1_g720.1.mk	0.9537	0.904855	turquoise	Pav_sc0000890.1_g820.1.mk	0.912406	-0.527666	blue	Pav_sc0000890.1_g820.1.mk	0.912406	-0.687526	blue					Pav_sc0000363.1_g720.1.mk	0.9537	0.860285	turquoise
				Pav_sc0000072.1_g230.1.mk	0.953683	0.944521	turquoise	Pav_sc0003965.1_g010.1.br	0.911895	-0.707191	blue	Pav_sc0003965.1_g010.1.br	0.911895	-0.829798	blue					Pav_sc0000072.1_g230.1.mk	0.953683	0.860694	turquoise
				Pav_sc0005215.1_g030.1.mk	0.953662	0.942088	turquoise	Pav_sc0000111.1_g120.1.mk	-0.911752	0.759758	blue	Pav_sc0000111.1_g120.1.mk	-0.911752	0.82297	blue					Pav_sc0005215.1_g030.1.mk	0.953662	0.906172	turquoise
				Pav_sc0000037.1_g580.1.mk	0.953655	0.789902	turquoise	Pav_sc0002842.1_g240.1.mk	0.911649	-0.739587	blue	Pav_sc0002842.1_g240.1.mk	0.911649	-0.833751	blue					Pav_sc0000037.1_g580.1.mk	0.953655	0.730857	turquoise
				novel.240	0.953452	0.790219	turquoise	Pav_sc0000044.1_g1060.1.mk	0.911491	-0.722437	blue	Pav_sc0000044.1_g1060.1.mk	0.911491	-0.819997	blue					novel.240	0.953452	0.723532	turquoise
				Pav_sc0002360.1_g370.1.mk	0.953449	0.824411	turquoise	Pav_sc0000766.1_g330.1.mk	0.911079	-0.799001	blue	Pav_sc0000766.1_g330.1.mk	0.911079	-0.856373	blue					Pav_sc0002360.1_g370.1.mk	0.953449	0.725655	turquoise
				Pav_sc0005664.1_g120.1.mk	0.953414	0.846026	turquoise	Pav_sc0001309.1_g540.1.mk	0.910672	-0.66473	blue	Pav_sc0001309.1_g540.1.mk	0.910672	-0.789293	blue					Pav_sc0005664.1_g120.1.mk	0.953414	0.820625	turquoise
				Pav_sc0000689.1_g450.1.mk	0.953269	0.858447	turquoise	Pav_sc0000143.1_g670.1.mk	0.910468	-0.608308	blue	Pav_sc0000143.1_g670.1.mk	0.910468	-0.758059	blue					Pav_sc0000689.1_g450.1.mk	0.953269	0.834968	turquoise
				Pav_sc0000567.1_g170.1.mk	0.95319	0.948833	turquoise	Pav_sc0000129.1_g1670.1.mk	0.91034	-0.860041	blue	Pav_sc0000129.1_g1670.1.mk	0.91034	-0.923758	blue					Pav_sc0000567.1_g170.1.mk	0.95319	0.924217	turquoise
				Pav_sc0000780.1_g130.1.br	0.953184	0.864797	turquoise	Pav_sc0000049.1_g010.1.mk	0.910183	-0.610904	blue	Pav_sc0000049.1_g010.1.mk	0.910183	-0.750684	blue					Pav_sc0000780.1_g130.1.br	0.953184	0.770228	turquoise
				Pav_sc0000130.1_g190.1.mk	0.953171	0.858317	turquoise	Pav_sc0000467.1_g1050.1.mk	0.910085	-0.658843	blue	Pav_sc0000467.1_g1050.1.mk	0.910085	-0.785211	blue					Pav_sc0000130.1_g190.1.mk	0.953171	0.820149	turquoise
				Pav_sc0000381.1_g160.1.mk	0.95301	0.774804	turquoise	Pav_sc0000363.1_g710.1.mk	0.909942	-0.587584	blue	Pav_sc0000363.1_g710.1.mk	0.909942	-0.706635	blue					Pav_sc0000381.1_g160.1.mk	0.95301	0.702843	turquoise
				Pav_sc0000591.1_g330.1.mk	0.952806	0.779366	turquoise	Pav_sc0001046.1_g450.1.mk	-0.909856	0.501265	blue	Pav_sc0001046.1_g450.1.mk	-0.909856	0.677614	blue					Pav_sc0000591.1_g330.1.mk	0.952806	0.686866	turquoise
				novel.1268	0.952631	0.855446	turquoise	Pav_sc0000979.1_g140.1.mk	0.909154	-0.628526	blue	Pav_sc0000979.1_g140.1.mk	0.909154	-0.761152	blue					novel.1268	0.952631	0.753075	turquoise
				Pav_sc0000169.1_g080.1.mk	0.95253	0.822712	turquoise	Pav_sc0002360.1_g860.1.mk	0.908914	-0.637546	blue	Pav_sc0002360.1_g860.1.mk	0.908914	-0.773676	blue					Pav_sc0000169.1_g080.1.mk	0.95253	0.788017	turquoise
				Pav_sc0002635.1_g050.1.mk	0.952379	0.830624	turquoise	Pav_co3996163.1_g010.1.br	0.908332	-0.702649	blue	Pav_co3996163.1_g010.1.br	0.908332	-0.798107	blue					Pav_sc0002635.1_g050.1.mk	0.952379	0.755935	turquoise
				Pav_sc0000045.1_g440.1.mk	0.952297	0.764439	turquoise	Pav_sc0001411.1_g470.1.mk	0.908285	-0.82181	blue	Pav_sc0001411.1_g470.1.mk	0.908285	-0.884229	blue					Pav_sc0000045.1_g440.1.mk	0.952297	0.69959	turquoise
				Pav_sc0000119.1_g450.1.mk	0.95228	0.802757	turquoise	Pav_sc0009104.1_g010.1.mk	0.907883	-0.804305	blue	Pav_sc0009104.1_g010.1.mk	0.907883	-0.877008	blue					Pav_sc0000119.1_g450.1.mk	0.95228	0.720526	turquoise
				Pav_sc0000220.1_g790.1.mk	0.952144	0.858819	turquoise	Pav_sc0000428.1_g720.1.mk	0.907788	-0.707828	blue	Pav_sc0000428.1_g720.1.mk	0.907788	-0.786273	blue					Pav_sc0000220.1_g790.1.mk	0.952144	0.758754	turquoise
				Pav_sc0000006.1_g110.1.br	0.952004	0.818432	turquoise	Pav_sc0000480.1_g760.1.mk	0.907584	-0.727361	blue	Pav_sc0000480.1_g760.1.mk	0.907584	-0.799364	blue					Pav_sc0000006.1_g110.1.br	0.952004	0.782756	turquoise
				Pav_sc0000354.1_g420.1.mk	0.952003	0.825856	turquoise	Pav_sc0001710.1_g070.1.mk	0.907538	-0.740568	blue	Pav_sc0001710.1_g070.1.mk	0.907538	-0.824251	blue					Pav_sc0000354.1_g420.1.mk	0.952003	0.746731	turquoise
				Pav_sc0002597.1_g040.1.mk	0.951988	0.776604	turquoise	Pav_sc0000093.1_g310.1.mk	0.907217	-0.6141	blue	Pav_sc0000093.1_g310.1.mk	0.907217	-0.74723	blue					Pav_sc0002597.1_g040.1.mk	0.951988	0.703178	turquoise
				Pav_sc0000467.1_g830.1.br	0.951833	0.932997	turquoise	Pav_sc0000107.1_g150.1.mk	0.906985	-0.649401	blue	Pav_sc0000107.1_g150.1.mk	0.906985	-0.752206	blue					Pav_sc0000467.1_g830.1.br	0.951833	0.902372	turquoise
				Pav_sc0002360.1_g930.1.mk	0.951768	0.900156	turquoise	Pav_sc0008597.1_g040.1.br	0.906501	-0.782173	blue	Pav_sc0008597.1_g040.1.br	0.906501	-0.860506	blue					Pav_sc0002360.1_g930.1.mk	0.951768	0.807125	turquoise
				Pav_sc0003582.1_g030.1.mk	0.951467	0.775456	turquoise	Pav_sc0000176.1_g240.1.mk	-0.906429	0.865732	blue	Pav_sc0000176.1_g240.1.mk	-0.906429	0.915166	blue					Pav_sc0003582.1_g030.1.mk	0.951467	0.713516	turquoise
				Pav_sc0000157.1_g310.1.br	0.950408	0.779669	turquoise	Pav_sc0000355.1_g060.1.mk	0.90607	-0.617703	blue	Pav_sc0000355.1_g060.1.mk	0.90607	-0.725649	blue					Pav_sc0000157.1_g310.1.br	0.950408	0.70537	turquoise
				novel.869	0.950185	0.939036	turquoise	Pav_sc0001518.1_g030.1.mk	0.905921	-0.683519	blue	Pav_sc0001518.1_g030.1.mk	0.905921	-0.792266	blue					novel.869	0.950185	0.926839	turquoise
				Pav_sc0001335.1_g250.1.mk	0.949685	0.955193	turquoise	Pav_sc0000789.1_g330.1.mk	-0.905696	0.63221	blue	Pav_sc0000789.1_g330.1.mk	-0.905696	0.748727	blue					Pav_sc0001335.1_g250.1.mk	0.949685	0.924029	turquoise
				Pav_sc0000545.1_g190.1.br	0.949563	0.765406	turquoise	Pav_sc0000704.1_g240.1.mk	0.90529	-0.719991	blue	Pav_sc0000704.1_g240.1.mk	0.90529	-0.795623	blue					Pav_sc0000545.1_g190.1.br	0.949563	0.680137	turquoise
				Pav_sc0000890.1_g810.1.mk	0.949561	0.823718	turquoise	Pav_sc0001502.1_g530.1.mk	0.905281	-0.604454	blue	Pav_sc0001502.1_g530.1.mk	0.905281	-0.730823	blue					Pav_sc0000890.1_g810.1.mk	0.949561	0.746547	turquoise
				Pav_sc0000370.1_g830.1.mk	0.949309	0.793409	turquoise	Pav_sc0000716.1_g200.1.mk	0.904996	-0.719275	blue	Pav_sc0000716.1_g200.1.mk	0.904996	-0.835416	blue					Pav_sc0000370.1_g830.1.mk	0.949309	0.746319	turquoise
				Pav_sc0002154.1_g110.1.mk	0.949284	0.900995	turquoise	Pav_sc0000087.1_g250.1.mk	0.904898	-0.691884	blue	Pav_sc0000087.1_g250.1.mk	0.904898	-0.804999	blue					Pav_sc0002154.1_g110.1.mk	0.949284	0.821831	turquoise
				Pav_sc0002722.1_g040.1.mk	0.949256	0.785769	turquoise	Pav_sc0002433.1_g210.1.mk	0.904783	-0.741694	blue	Pav_sc0002433.1_g210.1.mk	0.904783	-0.82134	blue					Pav_sc0002722.1_g040.1.mk	0.949256	0.742124	turquoise
				Pav_sc0001111.1_g270.1.mk	0.949148	0.900023	turquoise	Pav_sc0002080.1_g120.1.mk	0.904546	-0.706777	blue	Pav_sc0002080.1_g120.1.mk	0.904546	-0.787557	blue					Pav_sc0001111.1_g270.1.mk	0.949148	0.866018	turquoise
				Pav_sc0000042.1_g610.1.mk	0.949139	0.79747	turquoise	Pav_sc0000823.1_g470.1.mk	0.904283	-0.661558	blue	Pav_sc0000823.1_g470.1.mk	0.904283	-0.74642	blue					Pav_sc0000042.1_g610.1.mk	0.949139	0.746775	turquoise
				Pav_sc0000095.1_g950.1.mk	0.949008	0.829872	turquoise	Pav_sc0000702.1_g370.1.mk	-0.903793	0.887803	blue	Pav_sc0000702.1_g370.1.mk	-0.903793	0.910734	blue					Pav_sc0000095.1_g950.1.mk	0.949008	0.764939	turquoise
				Pav_sc0000449.1_g530.1.mk	0.948866	0.770556	turquoise	Pav_sc0000568.1_g030.1.br	0.903699	-0.790399	blue	Pav_sc0000568.1_g030.1.br	0.903699	-0.861943	blue					Pav_sc0000449.1_g530.1.mk	0.948866	0.683986	turquoise
				Pav_sc0000099.1_g520.1.mk	0.94883	0.771056	turquoise	Pav_sc0003503.1_g060.1.mk	0.902895	-0.604894	blue	Pav_sc0003503.1_g060.1.mk	0.902895	-0.735747	blue					Pav_sc0000099.1_g520.1.mk	0.94883	0.729269	turquoise
				Pav_sc0000055.1_g680.1.mk	0.948829	0.812089	turquoise	Pav_sc0000484.1_g440.1.mk	0.902422	-0.695747	blue	Pav_sc0000484.1_g440.1.mk	0.902422	-0.778569	blue					Pav_sc0000055.1_g680.1.mk	0.948829	0.723958	turquoise
				Pav_sc0000616.1_g390.1.mk	0.948605	0.884857	turquoise	Pav_sc0000554.1_g2010.1.mk	0.902323	-0.839758	blue	Pav_sc0000554.1_g2010.1.mk	0.902323	-0.873923	blue					Pav_sc0000616.1_g390.1.mk	0.948605	0.816936	turquoise
				Pav_sc0002327.1_g970.1.mk	0.94856	0.804073	turquoise	Pav_sc0001911.1_g070.1.mk	0.901723	-0.768218	blue	Pav_sc0001911.1_g070.1.mk	0.901723	-0.854054	blue					Pav_sc0002327.1_g970.1.mk	0.94856	0.718801	turquoise
				Pav_sc0002154.1_g200.1.mk	0.948542	0.815026	turquoise	Pav_sc0000910.1_g230.1.mk	0.901722	-0.797582	blue	Pav_sc0000910.1_g230.1.mk	0.901722	-0.859247	blue					Pav_sc0002154.1_g200.1.mk	0.948542	0.781801	turquoise
				Pav_sc0000229.1_g410.1.mk	0.948367	0.760039	turquoise	Pav_sc0000396.1_g1180.1.mk	0.900765	-0.768549	blue	Pav_sc0000396.1_g1180.1.mk	0.900765	-0.834678	blue					Pav_sc0000229.1_g410.1.mk	0.948367	0.702152	turquoise
				Pav_sc0000030.1_g840.1.mk	0.948346	0.817603	turquoise	Pav_sc0000254.1_g520.1.mk	0.900335	-0.867173	blue	Pav_sc0000254.1_g520.1.mk	0.900335	-0.898347	blue					Pav_sc0000030.1_g840.1.mk	0.948346	0.778479	turquoise
				Pav_sc0002179.1_g120.1.mk	0.94817	0.821216	turquoise	Pav_sc0000138.1_g1040.1.mk	0.899902	-0.726398	blue	Pav_sc0000138.1_g1040.1.mk	0.899902	-0.789475	blue					Pav_sc0002179.1_g120.1.mk	0.94817	0.765408	turquoise
				Pav_sc0000480.1_g840.1.mk	0.947708	0.77321	turquoise	Pav_sc0002681.1_g090.1.mk	0.899645	-0.755213	blue	Pav_sc0002681.1_g090.1.mk	0.899645	-0.819614	blue					Pav_sc0000480.1_g840.1.mk	0.947708	0.695516	turquoise
				Pav_sc0002456.1_g120.1.mk	0.947658	0.857284	turquoise	Pav_sc0009104.1_g020.1.br	0.899547	-0.697196	blue	Pav_sc0009104.1_g020.1.br	0.899547	-0.787703	blue					Pav_sc0002456.1_g120.1.mk	0.947658	0.795974	turquoise
				Pav_sc0000040.1_g1090.1.mk	0.947503	0.795792	turquoise	Pav_sc0003135.1_g140.1.mk	0.899292	-0.783272	blue	Pav_sc0003135.1_g140.1.mk	0.899292	-0.849297	blue					Pav_sc0000040.1_g1090.1.mk	0.947503	0.709581	turquoise
				Pav_sc0001769.1_g040.1.mk	0.947275	0.832757	turquoise	Pav_sc0001102.1_g230.1.mk	0.899202	-0.773318	blue	Pav_sc0001102.1_g230.1.mk	0.899202	-0.854472	blue					Pav_sc0001769.1_g040.1.mk	0.947275	0.770783	turquoise
				Pav_sc0003823.1_g160.1.mk	0.946695	0.760085	turquoise	Pav_sc0001406.1_g240.1.mk	0.898927	-0.632841	blue	Pav_sc0001406.1_g240.1.mk	0.898927	-0.738764	blue					Pav_sc0003823.1_g160.1.mk	0.946695	0.711352	turquoise
				Pav_sc0000373.1_g440.1.mk	0.94592	0.871988	turquoise	Pav_sc0000095.1_g1520.1.mk	0.898922	-0.80682	blue	Pav_sc0000095.1_g1520.1.mk	0.898922	-0.891081	blue					Pav_sc0000373.1_g440.1.mk	0.94592	0.868759	turquoise
				Pav_sc0000212.1_g090.1.mk	0.945901	0.910825	turquoise	Pav_co3995259.1_g010.1.mk	0.898888	-0.753086	blue	Pav_co3995259.1_g010.1.mk	0.898888	-0.814348	blue					Pav_sc0000212.1_g090.1.mk	0.945901	0.885467	turquoise
				Pav_sc0000800.1_g1340.1.mk	0.945828	0.837913	turquoise	Pav_sc0004578.1_g060.1.mk	0.89847	-0.62527	blue	Pav_sc0004578.1_g060.1.mk	0.89847	-0.75411	blue					Pav_sc0000800.1_g1340.1.mk	0.945828	0.799536	turquoise
				Pav_sc0000736.1_g120.1.mk	0.94559	0.753654	turquoise	Pav_sc0000465.1_g940.1.mk	-0.897997	0.847414	blue	Pav_sc0000465.1_g940.1.mk	-0.897997	0.89953	blue					Pav_sc0000736.1_g120.1.mk	0.94559	0.673894	turquoise
				Pav_sc0000639.1_g060.1.mk	0.945535	0.827307	turquoise	novel.33	-0.897545	0.786205	blue	novel.33	-0.897545	0.883147	blue					Pav_sc0000639.1_g060.1.mk	0.945535	0.777574	turquoise
				Pav_sc0000877.1_g1500.1.mk	0.945471	0.949248	turquoise	Pav_sc0000981.1_g380.1.mk	0.897458	-0.726323	blue	Pav_sc0000981.1_g380.1.mk	0.897458	-0.829411	blue					Pav_sc0000877.1_g1500.1.mk	0.945471	0.925018	turquoise
				Pav_sc0001341.1_g540.1.mk	0.945428	0.807707	turquoise	Pav_sc0000661.1_g230.1.mk	0.897245	-0.753984	blue	Pav_sc0000661.1_g230.1.mk	0.897245	-0.857551	blue					Pav_sc0001341.1_g540.1.mk	0.945428	0.71457	turquoise
				Pav_sc0000540.1_g080.1.mk	0.945246	0.788446	turquoise	Pav_sc0001862.1_g290.1.mk	0.897123	-0.577924	blue	Pav_sc0001862.1_g290.1.mk	0.897123	-0.729492	blue					Pav_sc0000540.1_g080.1.mk	0.945246	0.704142	turquoise
				Pav_sc0000661.1_g110.1.mk	0.945122	0.798629	turquoise	Pav_sc0000549.1_g220.1.mk	0.896995	-0.753403	blue	Pav_sc0000549.1_g220.1.mk	0.896995	-0.83725	blue					Pav_sc0000661.1_g110.1.mk	0.945122	0.754822	turquoise
				Pav_sc0000103.1_g1240.1.mk	0.945025	0.940662	turquoise	Pav_sc0003492.1_g080.1.mk	0.896828	-0.774108	blue	Pav_sc0003492.1_g080.1.mk	0.896828	-0.867129	blue					Pav_sc0000103.1_g1240.1.mk	0.945025	0.889086	turquoise
				Pav_co4075481.1_g010.1.mk	0.944835	0.816517	turquoise	Pav_sc0001183.1_g360.1.mk	0.896766	-0.58191	blue	Pav_sc0001183.1_g360.1.mk	0.896766	-0.730478	blue					Pav_co4075481.1_g010.1.mk	0.944835	0.789202	turquoise
				Pav_sc0003562.1_g240.1.mk	0.944808	0.763243	turquoise	Pav_sc0001580.1_g240.1.br	0.896512	-0.576709	blue	Pav_sc0001580.1_g240.1.br	0.896512	-0.709271	blue					Pav_sc0003562.1_g240.1.mk	0.944808	0.714467	turquoise
				Pav_sc0000200.1_g150.1.br	0.944657	0.766682	turquoise	Pav_sc0000556.1_g090.1.mk	0.896103	-0.61252	blue	Pav_sc0000556.1_g090.1.mk	0.896103	-0.76206	blue					Pav_sc0000200.1_g150.1.br	0.944657	0.715013	turquoise
				Pav_sc0001267.1_g090.1.mk	0.944628	0.784059	turquoise	Pav_sc0000977.1_g100.1.mk	0.895525	-0.646934	blue	Pav_sc0000977.1_g100.1.mk	0.895525	-0.761306	blue					Pav_sc0001267.1_g090.1.mk	0.944628	0.749252	turquoise
				Pav_sc0000200.1_g110.1.br	0.944272	0.78446	turquoise	Pav_sc0000773.1_g010.1.mk	0.895517	-0.617856	blue	Pav_sc0000773.1_g010.1.mk	0.895517	-0.748787	blue					Pav_sc0000200.1_g110.1.br	0.944272	0.717565	turquoise
				Pav_sc0001695.1_g220.1.mk	0.944118	0.768488	turquoise	Pav_sc0007796.1_g050.1.mk	0.895286	-0.739667	blue	Pav_sc0007796.1_g050.1.mk	0.895286	-0.845645	blue					Pav_sc0001695.1_g220.1.mk	0.944118	0.692651	turquoise
				Pav_sc0002342.1_g030.1.br	0.943909	0.9109	turquoise	Pav_sc0001938.1_g550.1.mk	0.89462	-0.538782	blue	Pav_sc0001938.1_g550.1.mk	0.89462	-0.718104	blue					Pav_sc0002342.1_g030.1.br	0.943909	0.821892	turquoise
				Pav_sc0003532.1_g010.1.mk	0.943764	0.773534	turquoise	Pav_sc0001663.1_g170.1.mk	0.894007	-0.604777	blue	Pav_sc0001663.1_g170.1.mk	0.894007	-0.758608	blue					Pav_sc0003532.1_g010.1.mk	0.943764	0.697537	turquoise
				Pav_sc0002451.1_g160.1.mk	0.943517	0.93749	turquoise	Pav_sc0000103.1_g1760.1.mk	0.893815	-0.629971	blue	Pav_sc0000103.1_g1760.1.mk	0.893815	-0.72189	blue					Pav_sc0002451.1_g160.1.mk	0.943517	0.906067	turquoise
				Pav_sc0001080.1_g1170.1.mk	0.94346	0.888669	turquoise	Pav_sc0000052.1_g760.1.mk	0.893251	-0.759034	blue	Pav_sc0000052.1_g760.1.mk	0.893251	-0.815662	blue					Pav_sc0001080.1_g1170.1.mk	0.94346	0.847582	turquoise
				Pav_sc0000890.1_g1330.1.mk	0.94342	0.859937	turquoise	Pav_sc0000314.1_g200.1.mk	0.89322	-0.801068	blue	Pav_sc0000314.1_g200.1.mk	0.89322	-0.869701	blue					Pav_sc0000890.1_g1330.1.mk	0.94342	0.799698	turquoise
				Pav_sc0000031.1_g010.1.mk	0.943297	0.82482	turquoise	Pav_sc0001405.1_g1010.1.mk	0.892739	-0.58471	blue	Pav_sc0001405.1_g1010.1.mk	0.892739	-0.733558	blue					Pav_sc0000031.1_g010.1.mk	0.943297	0.791038	turquoise
				novel.1010	0.943126	0.923149	turquoise	Pav_sc0000054.1_g430.1.mk	0.892649	-0.725646	blue	Pav_sc0000054.1_g430.1.mk	0.892649	-0.808143	blue					novel.1010	0.943126	0.836971	turquoise
				Pav_sc0002479.1_g700.1.mk	0.943098	0.763092	turquoise	Pav_sc0000659.1_g210.1.mk	-0.892248	0.889168	blue	Pav_sc0000659.1_g210.1.mk	-0.892248	0.917805	blue					Pav_sc0002479.1_g700.1.mk	0.943098	0.659588	turquoise
				Pav_sc0001080.1_g870.1.mk	0.943041	0.750233	turquoise	Pav_sc0000582.1_g130.1.mk	0.89198	-0.63662	blue	Pav_sc0000582.1_g130.1.mk	0.89198	-0.769316	blue					Pav_sc0001080.1_g870.1.mk	0.943041	0.655246	turquoise
				Pav_sc0000164.1_g210.1.mk	0.94297	0.853459	turquoise	Pav_sc0000636.1_g270.1.mk	-0.891869	0.712197	blue	Pav_sc0000636.1_g270.1.mk	-0.891869	0.793511	blue					Pav_sc0000164.1_g210.1.mk	0.94297	0.799945	turquoise
				Pav_sc0001335.1_g050.1.mk	0.942793	0.932265	turquoise	Pav_sc0000127.1_g110.1.mk	-0.891202	0.91195	blue	Pav_sc0000127.1_g110.1.mk	-0.891202	0.925188	blue					Pav_sc0001335.1_g050.1.mk	0.942793	0.88941	turquoise
				Pav_sc0001932.1_g110.1.mk	0.942582	0.748008	turquoise	Pav_sc0000129.1_g910.1.mk	0.890395	-0.662823	blue	Pav_sc0000129.1_g910.1.mk	0.890395	-0.740023	blue					Pav_sc0001932.1_g110.1.mk	0.942582	0.664397	turquoise
				Pav_sc0000624.1_g2130.1.mk	0.942427	0.931457	turquoise	Pav_sc0000700.1_g1340.1.mk	0.890214	-0.84779	blue	Pav_sc0000700.1_g1340.1.mk	0.890214	-0.875688	blue					Pav_sc0000624.1_g2130.1.mk	0.942427	0.895608	turquoise
				Pav_sc0002250.1_g270.1.br	0.942306	0.797312	turquoise	Pav_sc0000220.1_g210.1.mk	0.889947	-0.842016	blue	Pav_sc0000220.1_g210.1.mk	0.889947	-0.891532	blue					Pav_sc0002250.1_g270.1.br	0.942306	0.706806	turquoise
				Pav_sc0000588.1_g540.1.mk	0.942127	0.918584	turquoise	Pav_sc0000370.1_g810.1.mk	0.889426	-0.77011	blue	Pav_sc0000370.1_g810.1.mk	0.889426	-0.839223	blue					Pav_sc0000588.1_g540.1.mk	0.942127	0.870541	turquoise
				Pav_sc0000200.1_g140.1.mk	0.941912	0.764869	turquoise	Pav_sc0000540.1_g010.1.mk	0.889254	-0.856712	blue	Pav_sc0000540.1_g010.1.mk	0.889254	-0.88693	blue					Pav_sc0000200.1_g140.1.mk	0.941912	0.706749	turquoise
				Pav_sc0000396.1_g160.1.mk	0.941856	0.92651	turquoise	Pav_sc0000157.1_g360.1.br	0.889045	-0.59015	blue	Pav_sc0000157.1_g360.1.br	0.889045	-0.730184	blue					Pav_sc0000396.1_g160.1.mk	0.941856	0.879851	turquoise
				Pav_sc0004305.1_g220.1.mk	0.941714	0.770768	turquoise	Pav_sc0000029.1_g110.1.mk	0.888856	-0.707092	blue	Pav_sc0000029.1_g110.1.mk	0.888856	-0.771183	blue					Pav_sc0004305.1_g220.1.mk	0.941714	0.723945	turquoise
				Pav_sc0001124.1_g320.1.mk	0.941703	0.785534	turquoise	Pav_sc0000220.1_g1700.1.mk	0.888502	-0.785232	blue	Pav_sc0000220.1_g1700.1.mk	0.888502	-0.873289	blue					Pav_sc0001124.1_g320.1.mk	0.941703	0.762351	turquoise
				Pav_sc0000100.1_g350.1.mk	0.941627	0.772793	turquoise	Pav_sc0000124.1_g110.1.mk	0.888321	-0.566787	blue	Pav_sc0000124.1_g110.1.mk	0.888321	-0.710273	blue					Pav_sc0000100.1_g350.1.mk	0.941627	0.669174	turquoise
				Pav_sc0000431.1_g130.1.mk	0.94118	0.920301	turquoise	Pav_sc0000709.1_g120.1.mk	-0.888273	0.863592	blue	Pav_sc0000709.1_g120.1.mk	-0.888273	0.895061	blue					Pav_sc0000431.1_g130.1.mk	0.94118	0.868247	turquoise
				Pav_sc0004226.1_g050.1.mk	0.941131	0.926897	turquoise	Pav_sc0000980.1_g130.1.br	0.888162	-0.702461	blue	Pav_sc0000980.1_g130.1.br	0.888162	-0.759763	blue					Pav_sc0004226.1_g050.1.mk	0.941131	0.86621	turquoise
				Pav_sc0000554.1_g2260.1.mk	0.94084	0.919749	turquoise	Pav_sc0000886.1_g550.1.mk	0.887752	-0.758628	blue	Pav_sc0000886.1_g550.1.mk	0.887752	-0.867944	blue					Pav_sc0000554.1_g2260.1.mk	0.94084	0.881816	turquoise
				Pav_sc0001498.1_g230.1.br	0.940829	0.854694	turquoise	novel.1073	0.887589	-0.719802	blue	novel.1073	0.887589	-0.837955	blue					Pav_sc0001498.1_g230.1.br	0.940829	0.760245	turquoise
				Pav_sc0000600.1_g350.1.mk	0.940716	0.773577	turquoise	Pav_sc0001529.1_g020.1.mk	0.887573	-0.555448	blue	Pav_sc0001529.1_g020.1.mk	0.887573	-0.708705	blue					Pav_sc0000600.1_g350.1.mk	0.940716	0.704247	turquoise
				novel.1368	0.94067	0.886422	turquoise	Pav_sc0000491.1_g990.1.mk	0.887394	-0.766635	blue	Pav_sc0000491.1_g990.1.mk	0.887394	-0.824709	blue					novel.1368	0.94067	0.88202	turquoise
				Pav_sc0000893.1_g400.1.mk	0.94062	0.878619	turquoise	Pav_sc0000912.1_g070.1.mk	0.886706	-0.896177	blue	Pav_sc0000912.1_g070.1.mk	0.886706	-0.917323	blue					Pav_sc0000893.1_g400.1.mk	0.94062	0.861992	turquoise
				Pav_sc0001080.1_g950.1.mk	0.940497	0.921141	turquoise	novel.1287	0.886337	-0.817288	blue	novel.1287	0.886337	-0.890729	blue					Pav_sc0001080.1_g950.1.mk	0.940497	0.850539	turquoise
				Pav_sc0001695.1_g210.1.br	0.940361	0.829254	turquoise	Pav_sc0002207.1_g410.1.mk	0.885992	-0.848131	blue	Pav_sc0002207.1_g410.1.mk	0.885992	-0.880522	blue					Pav_sc0001695.1_g210.1.br	0.940361	0.752442	turquoise
				Pav_sc0007634.1_g010.1.mk	0.940199	0.811763	turquoise	Pav_sc0001869.1_g780.1.mk	0.885959	-0.713165	blue	Pav_sc0001869.1_g780.1.mk	0.885959	-0.778783	blue					Pav_sc0007634.1_g010.1.mk	0.940199	0.711418	turquoise
				Pav_sc0000130.1_g180.1.mk	0.940188	0.798501	turquoise	Pav_sc0000042.1_g060.1.mk	0.88575	-0.634058	blue	Pav_sc0000042.1_g060.1.mk	0.88575	-0.758957	blue					Pav_sc0000130.1_g180.1.mk	0.940188	0.768309	turquoise
				Pav_sc0001708.1_g040.1.mk	0.940161	0.747794	turquoise	Pav_sc0000893.1_g090.1.mk	0.885301	-0.638755	blue	Pav_sc0000893.1_g090.1.mk	0.885301	-0.722742	blue					Pav_sc0001708.1_g040.1.mk	0.940161	0.69667	turquoise
				Pav_sc0001872.1_g160.1.mk	0.940113	0.933672	turquoise	Pav_sc0000323.1_g310.1.mk	0.88491	-0.907126	blue	Pav_sc0000323.1_g310.1.mk	0.88491	-0.912637	blue					Pav_sc0001872.1_g160.1.mk	0.940113	0.887038	turquoise
				Pav_sc0000069.1_g300.1.mk	0.93995	0.75804	turquoise	Pav_sc0000491.1_g770.1.mk	0.883929	-0.664145	blue	Pav_sc0000491.1_g770.1.mk	0.883929	-0.75736	blue					Pav_sc0000069.1_g300.1.mk	0.93995	0.678664	turquoise
				Pav_sc0000142.1_g060.1.mk	0.939759	0.738728	turquoise	Pav_sc0000405.1_g610.1.mk	0.88289	-0.775546	blue	Pav_sc0000405.1_g610.1.mk	0.88289	-0.846441	blue					Pav_sc0000142.1_g060.1.mk	0.939759	0.658572	turquoise
				Pav_sc0000886.1_g090.1.mk	0.939731	0.950855	turquoise	Pav_sc0000020.1_g060.1.mk	0.88226	-0.52725	blue	Pav_sc0000020.1_g060.1.mk	0.88226	-0.66505	blue					Pav_sc0000886.1_g090.1.mk	0.939731	0.898436	turquoise
				Pav_sc0002156.1_g060.1.mk	0.939597	0.808671	turquoise	Pav_sc0000998.1_g190.1.mk	-0.882026	0.762549	blue	Pav_sc0000998.1_g190.1.mk	-0.882026	0.829698	blue					Pav_sc0002156.1_g060.1.mk	0.939597	0.78217	turquoise
				Pav_sc0001102.1_g930.1.br	-0.939499	-0.916863	turquoise	Pav_sc0000052.1_g680.1.mk	0.882016	-0.637453	blue	Pav_sc0000052.1_g680.1.mk	0.882016	-0.756058	blue					Pav_sc0001102.1_g930.1.br	-0.939499	-0.843079	turquoise
				Pav_sc0000044.1_g140.1.mk	0.939279	0.852691	turquoise	Pav_sc0001476.1_g100.1.mk	-0.881894	0.797228	blue	Pav_sc0001476.1_g100.1.mk	-0.881894	0.867546	blue					Pav_sc0000044.1_g140.1.mk	0.939279	0.822031	turquoise
				Pav_sc0000119.1_g430.1.mk	0.939241	0.817259	turquoise	novel.953	0.881834	-0.815034	blue	novel.953	0.881834	-0.849832	blue					Pav_sc0000119.1_g430.1.mk	0.939241	0.72385	turquoise
				novel.523	0.939107	0.842671	turquoise	Pav_sc0001181.1_g880.1.mk	0.881655	-0.67995	blue	Pav_sc0001181.1_g880.1.mk	0.881655	-0.761587	blue					novel.523	0.939107	0.755774	turquoise
				Pav_sc0001205.1_g010.1.mk	0.938959	0.797947	turquoise	Pav_sc0000558.1_g600.1.mk	0.881642	-0.698856	blue	Pav_sc0000558.1_g600.1.mk	0.881642	-0.786733	blue					Pav_sc0001205.1_g010.1.mk	0.938959	0.709062	turquoise
				Pav_sc0001169.1_g030.1.mk	0.938649	0.847355	turquoise	Pav_sc0001938.1_g190.1.mk	0.881621	-0.869937	blue	Pav_sc0001938.1_g190.1.mk	0.881621	-0.917214	blue					Pav_sc0001169.1_g030.1.mk	0.938649	0.841599	turquoise
				Pav_sc0000017.1_g1040.1.mk	0.93852	0.9352	turquoise	Pav_sc0000146.1_g490.1.mk	0.881115	-0.656808	blue	Pav_sc0000146.1_g490.1.mk	0.881115	-0.738673	blue					Pav_sc0000017.1_g1040.1.mk	0.93852	0.904534	turquoise
				Pav_sc0000254.1_g1220.1.mk	0.938484	0.771537	turquoise	Pav_sc0000027.1_g240.1.mk	0.880949	-0.527869	blue	Pav_sc0000027.1_g240.1.mk	0.880949	-0.666103	blue					Pav_sc0000254.1_g1220.1.mk	0.938484	0.734552	turquoise
				Pav_sc0001046.1_g080.1.mk	0.938463	0.885931	turquoise	Pav_sc0000766.1_g070.1.mk	0.88089	-0.592534	blue	Pav_sc0000766.1_g070.1.mk	0.88089	-0.727663	blue					Pav_sc0001046.1_g080.1.mk	0.938463	0.888082	turquoise
				Pav_sc0000111.1_g190.1.mk	0.938462	0.870193	turquoise	Pav_sc0000557.1_g1050.1.mk	0.8806	-0.840867	blue	Pav_sc0000557.1_g1050.1.mk	0.8806	-0.887048	blue					Pav_sc0000111.1_g190.1.mk	0.938462	0.804474	turquoise
				Pav_sc0000058.1_g150.1.mk	0.938111	0.885947	turquoise	Pav_sc0000558.1_g610.1.br	0.880332	-0.680313	blue	Pav_sc0000558.1_g610.1.br	0.880332	-0.779144	blue					Pav_sc0000058.1_g150.1.mk	0.938111	0.884886	turquoise
				Pav_sc0002327.1_g070.1.mk	0.938056	0.880125	turquoise	Pav_sc0001323.1_g330.1.mk	0.880028	-0.520886	blue	Pav_sc0001323.1_g330.1.mk	0.880028	-0.666213	blue					Pav_sc0002327.1_g070.1.mk	0.938056	0.881406	turquoise
				Pav_sc0001405.1_g1920.1.mk	0.937953	0.877387	turquoise	Pav_sc0001305.1_g330.1.mk	0.87952	-0.628432	blue	Pav_sc0001305.1_g330.1.mk	0.87952	-0.750768	blue					Pav_sc0001405.1_g1920.1.mk	0.937953	0.809951	turquoise
				Pav_sc0001205.1_g380.1.mk	0.937862	0.790158	turquoise	Pav_sc0001502.1_g510.1.mk	0.878884	-0.713922	blue	Pav_sc0001502.1_g510.1.mk	0.878884	-0.782943	blue					Pav_sc0001205.1_g380.1.mk	0.937862	0.742059	turquoise
				novel.1089	0.937856	0.774119	turquoise	Pav_sc0000886.1_g080.1.mk	-0.87858	0.781934	blue	Pav_sc0000886.1_g080.1.mk	-0.87858	0.850744	blue					novel.1089	0.937856	0.744953	turquoise
				Pav_sc0001751.1_g020.1.mk	0.937734	0.821734	turquoise	Pav_sc0000103.1_g1410.1.mk	0.878406	-0.874223	blue	Pav_sc0000103.1_g1410.1.mk	0.878406	-0.905521	blue					Pav_sc0001751.1_g020.1.mk	0.937734	0.792128	turquoise
				Pav_sc0003098.1_g390.1.br	0.937688	0.757861	turquoise	Pav_sc0001340.1_g080.1.mk	0.878156	-0.675777	blue	Pav_sc0001340.1_g080.1.mk	0.878156	-0.73445	blue					Pav_sc0003098.1_g390.1.br	0.937688	0.671689	turquoise
				Pav_sc0000733.1_g040.1.mk	0.937494	0.826616	turquoise	Pav_sc0000396.1_g550.1.mk	0.878061	-0.670018	blue	Pav_sc0000396.1_g550.1.mk	0.878061	-0.746853	blue					Pav_sc0000733.1_g040.1.mk	0.937494	0.817743	turquoise
				Pav_sc0002106.1_g370.1.mk	0.937276	0.76084	turquoise	Pav_sc0001305.1_g690.1.mk	0.87773	-0.683797	blue	Pav_sc0001305.1_g690.1.mk	0.87773	-0.792121	blue					Pav_sc0002106.1_g370.1.mk	0.937276	0.693941	turquoise
				Pav_sc0003189.1_g130.1.mk	0.937224	0.742612	turquoise	Pav_sc0000064.1_g100.1.mk	0.877729	-0.685091	blue	Pav_sc0000064.1_g100.1.mk	0.877729	-0.781691	blue					Pav_sc0003189.1_g130.1.mk	0.937224	0.663303	turquoise
				Pav_sc0000638.1_g930.1.mk	0.93703	0.842662	turquoise	Pav_sc0001080.1_g520.1.mk	0.877629	-0.716845	blue	Pav_sc0001080.1_g520.1.mk	0.877629	-0.799705	blue					Pav_sc0000638.1_g930.1.mk	0.93703	0.785927	turquoise
				Pav_sc0000142.1_g080.1.mk	0.93689	0.796675	turquoise	Pav_sc0000893.1_g840.1.mk	0.877317	-0.521782	blue	Pav_sc0000893.1_g840.1.mk	0.877317	-0.689043	blue					Pav_sc0000142.1_g080.1.mk	0.93689	0.735305	turquoise
				Pav_sc0000251.1_g140.1.br	0.936743	0.736486	turquoise	Pav_sc0001251.1_g440.1.mk	0.877145	-0.808992	blue	Pav_sc0001251.1_g440.1.mk	0.877145	-0.86006	blue					Pav_sc0000251.1_g140.1.br	0.936743	0.654942	turquoise
				Pav_sc0001243.1_g500.1.mk	0.936736	0.844734	turquoise	Pav_sc0002360.1_g140.1.mk	0.87565	-0.664991	blue	Pav_sc0002360.1_g140.1.mk	0.87565	-0.739403	blue					Pav_sc0001243.1_g500.1.mk	0.936736	0.800518	turquoise
				Pav_sc0004290.1_g160.1.mk	0.936236	0.881358	turquoise	Pav_sc0000376.1_g540.1.mk	-0.875123	0.799119	blue	Pav_sc0000376.1_g540.1.mk	-0.875123	0.825492	blue					Pav_sc0004290.1_g160.1.mk	0.936236	0.887052	turquoise
				Pav_sc0000103.1_g1460.1.mk	0.936105	0.858374	turquoise	Pav_sc0000062.1_g160.1.mk	0.875101	-0.836026	blue	Pav_sc0000062.1_g160.1.mk	0.875101	-0.898036	blue					Pav_sc0000103.1_g1460.1.mk	0.936105	0.851203	turquoise
				Pav_sc0000148.1_g600.1.mk	0.936015	0.767251	turquoise	Pav_sc0000998.1_g200.1.mk	-0.874655	0.831692	blue	Pav_sc0000998.1_g200.1.mk	-0.874655	0.883943	blue					Pav_sc0000148.1_g600.1.mk	0.936015	0.740811	turquoise
				Pav_sc0000410.1_g770.1.mk	0.935894	0.904974	turquoise	Pav_sc0000653.1_g100.1.mk	-0.8731	0.624952	blue	Pav_sc0000653.1_g100.1.mk	-0.8731	0.738935	blue					Pav_sc0000410.1_g770.1.mk	0.935894	0.901815	turquoise
				Pav_sc0002826.1_g090.1.br	0.935848	0.775967	turquoise	Pav_sc0000323.1_g020.1.mk	0.87292	-0.787664	blue	Pav_sc0000323.1_g020.1.mk	0.87292	-0.832876	blue					Pav_sc0002826.1_g090.1.br	0.935848	0.739535	turquoise
				Pav_sc0000507.1_g260.1.mk	0.935819	0.858841	turquoise	Pav_sc0002445.1_g080.1.mk	0.872825	-0.610527	blue	Pav_sc0002445.1_g080.1.mk	0.872825	-0.757923	blue					Pav_sc0000507.1_g260.1.mk	0.935819	0.852506	turquoise
				Pav_sc0000311.1_g890.1.mk	0.93553	0.868364	turquoise	Pav_sc0000069.1_g350.1.mk	0.87251	-0.558368	blue	Pav_sc0000069.1_g350.1.mk	0.87251	-0.698108	blue					Pav_sc0000311.1_g890.1.mk	0.93553	0.809941	turquoise
				Pav_sc0001859.1_g370.1.br	0.935192	0.765028	turquoise	Pav_sc0007640.1_g020.1.mk	0.871618	-0.593939	blue	Pav_sc0007640.1_g020.1.mk	0.871618	-0.70495	blue					Pav_sc0001859.1_g370.1.br	0.935192	0.695682	turquoise
				Pav_sc0001405.1_g1510.1.mk	0.935115	0.900051	turquoise	Pav_sc0001251.1_g090.1.mk	0.871429	-0.705953	blue	Pav_sc0001251.1_g090.1.mk	0.871429	-0.827136	blue					Pav_sc0001405.1_g1510.1.mk	0.935115	0.834526	turquoise
				Pav_sc0000017.1_g730.1.mk	0.935101	0.739834	turquoise	Pav_sc0000736.1_g360.1.mk	0.871371	-0.855284	blue	Pav_sc0000736.1_g360.1.mk	0.871371	-0.907526	blue					Pav_sc0000017.1_g730.1.mk	0.935101	0.66555	turquoise
				Pav_sc0000212.1_g1600.1.mk	0.935027	0.926002	turquoise	Pav_sc0001248.1_g220.1.mk	0.871292	-0.809888	blue	Pav_sc0001248.1_g220.1.mk	0.871292	-0.847953	blue					Pav_sc0000212.1_g1600.1.mk	0.935027	0.86933	turquoise
				Pav_sc0000108.1_g800.1.mk	0.934743	0.810088	turquoise	Pav_sc0002318.1_g360.1.mk	0.870824	-0.852312	blue	Pav_sc0002318.1_g360.1.mk	0.870824	-0.878586	blue					Pav_sc0000108.1_g800.1.mk	0.934743	0.711303	turquoise
				novel.868	0.93474	0.769109	turquoise	Pav_sc0001341.1_g190.1.mk	-0.870673	0.722902	blue	Pav_sc0001341.1_g190.1.mk	-0.870673	0.794325	blue					novel.868	0.93474	0.735366	turquoise
				Pav_sc0000890.1_g1300.1.mk	0.934717	0.911589	turquoise	Pav_sc0001813.1_g060.1.mk	0.870439	-0.665279	blue	Pav_sc0001813.1_g060.1.mk	0.870439	-0.771942	blue					Pav_sc0000890.1_g1300.1.mk	0.934717	0.835165	turquoise
				Pav_sc0000212.1_g730.1.mk	0.934677	0.77085	turquoise	Pav_sc0000174.1_g1650.1.mk	0.870391	-0.84828	blue	Pav_sc0000174.1_g1650.1.mk	0.870391	-0.908304	blue					Pav_sc0000212.1_g730.1.mk	0.934677	0.709432	turquoise
				Pav_sc0000220.1_g360.1.mk	0.934664	0.733024	turquoise	Pav_sc0000111.1_g030.1.mk	0.870284	-0.567482	blue	Pav_sc0000111.1_g030.1.mk	0.870284	-0.702794	blue					Pav_sc0000220.1_g360.1.mk	0.934664	0.635551	turquoise
				Pav_sc0001405.1_g1910.1.mk	0.93466	0.83971	turquoise	Pav_sc0000700.1_g740.1.mk	0.869595	-0.827085	blue	Pav_sc0000700.1_g740.1.mk	0.869595	-0.887231	blue					Pav_sc0001405.1_g1910.1.mk	0.93466	0.749233	turquoise
				Pav_sc0001309.1_g1250.1.mk	0.934389	0.920998	turquoise	Pav_sc0005421.1_g010.1.mk	0.869538	-0.779937	blue	Pav_sc0005421.1_g010.1.mk	0.869538	-0.846108	blue					Pav_sc0001309.1_g1250.1.mk	0.934389	0.863497	turquoise
				Pav_sc0000843.1_g460.1.mk	0.934327	0.76775	turquoise	Pav_sc0000370.1_g080.1.mk	0.869361	-0.830943	blue	Pav_sc0000370.1_g080.1.mk	0.869361	-0.904185	blue					Pav_sc0000843.1_g460.1.mk	0.934327	0.658874	turquoise
				Pav_sc0000754.1_g310.1.mk	0.934266	0.91254	turquoise	Pav_sc0003562.1_g030.1.mk	0.86936	-0.718679	blue	Pav_sc0003562.1_g030.1.mk	0.86936	-0.773127	blue					Pav_sc0000754.1_g310.1.mk	0.934266	0.879924	turquoise
				Pav_sc0000491.1_g220.1.mk	0.934209	0.756358	turquoise	Pav_sc0002741.1_g070.1.mk	-0.868598	0.860384	blue	Pav_sc0002741.1_g070.1.mk	-0.868598	0.918522	blue					Pav_sc0000491.1_g220.1.mk	0.934209	0.668274	turquoise
				Pav_sc0001963.1_g310.1.mk	0.934081	0.764796	turquoise	Pav_sc0000030.1_g140.1.mk	0.86851	-0.635108	blue	Pav_sc0000030.1_g140.1.mk	0.86851	-0.739609	blue					Pav_sc0001963.1_g310.1.mk	0.934081	0.693708	turquoise
				Pav_sc0000095.1_g1700.1.mk	0.933918	0.771817	turquoise	Pav_sc0001595.1_g260.1.mk	0.867999	-0.63113	blue	Pav_sc0001595.1_g260.1.mk	0.867999	-0.706913	blue					Pav_sc0000095.1_g1700.1.mk	0.933918	0.686622	turquoise
				Pav_sc0001397.1_g010.1.mk	0.933828	0.945281	turquoise	Pav_sc0000051.1_g170.1.mk	0.867913	-0.596891	blue	Pav_sc0000051.1_g170.1.mk	0.867913	-0.73536	blue					Pav_sc0001397.1_g010.1.mk	0.933828	0.876249	turquoise
				Pav_sc0000099.1_g650.1.mk	0.933638	0.750747	turquoise	Pav_sc0001862.1_g300.1.mk	0.867662	-0.755763	blue	Pav_sc0001862.1_g300.1.mk	0.867662	-0.852686	blue					Pav_sc0000099.1_g650.1.mk	0.933638	0.668846	turquoise
				novel.773	0.933581	0.77341	turquoise	novel.1078	0.86749	-0.605912	blue	novel.1078	0.86749	-0.752445	blue					novel.773	0.933581	0.683765	turquoise
				Pav_sc0006018.1_g310.1.mk	0.933529	0.771311	turquoise	Pav_sc0000354.1_g310.1.mk	0.867265	-0.669097	blue	Pav_sc0000354.1_g310.1.mk	0.867265	-0.766303	blue					Pav_sc0006018.1_g310.1.mk	0.933529	0.677848	turquoise
				Pav_sc0000909.1_g030.1.mk	0.933347	0.903291	turquoise	novel.376	-0.866672	0.798887	blue	novel.376	-0.866672	0.877542	blue					Pav_sc0000909.1_g030.1.mk	0.933347	0.901482	turquoise
				Pav_sc0000488.1_g030.1.mk	0.933341	0.734295	turquoise	Pav_sc0001846.1_g020.1.mk	0.866293	-0.512389	blue	Pav_sc0001846.1_g020.1.mk	0.866293	-0.663093	blue					Pav_sc0000488.1_g030.1.mk	0.933341	0.645423	turquoise
				Pav_sc0001411.1_g550.1.mk	0.93319	0.753117	turquoise	Pav_sc0000877.1_g930.1.mk	0.865435	-0.521637	blue	Pav_sc0000877.1_g930.1.mk	0.865435	-0.666207	blue					Pav_sc0001411.1_g550.1.mk	0.93319	0.669344	turquoise
				Pav_sc0000597.1_g270.1.mk	0.933168	0.756881	turquoise	Pav_sc0001624.1_g070.1.mk	0.865145	-0.81249	blue	Pav_sc0001624.1_g070.1.mk	0.865145	-0.873098	blue					Pav_sc0000597.1_g270.1.mk	0.933168	0.661711	turquoise
				Pav_sc0002358.1_g040.1.mk	0.932987	0.919912	turquoise	Pav_sc0010727.1_g020.1.mk	0.864938	-0.785397	blue	Pav_sc0010727.1_g020.1.mk	0.864938	-0.836238	blue					Pav_sc0002358.1_g040.1.mk	0.932987	0.903049	turquoise
				novel.837	0.932601	0.804273	turquoise	Pav_sc0001710.1_g1550.1.mk	0.864872	-0.743564	blue	Pav_sc0001710.1_g1550.1.mk	0.864872	-0.831689	blue					novel.837	0.932601	0.679182	turquoise
				Pav_sc0001323.1_g1090.1.mk	0.932505	0.843798	turquoise	Pav_sc0001575.1_g070.1.mk	0.864862	-0.543807	blue	Pav_sc0001575.1_g070.1.mk	0.864862	-0.688839	blue					Pav_sc0001323.1_g1090.1.mk	0.932505	0.797655	turquoise
				Pav_sc0005328.1_g010.1.br	0.932185	0.888621	turquoise	Pav_sc0000667.1_g090.1.mk	0.864149	-0.600116	blue	Pav_sc0000667.1_g090.1.mk	0.864149	-0.751106	blue					Pav_sc0005328.1_g010.1.br	0.932185	0.876012	turquoise
				Pav_sc0000396.1_g1100.1.mk	0.931983	0.959758	turquoise	Pav_sc0000890.1_g760.1.mk	-0.863953	0.8649	blue	Pav_sc0000890.1_g760.1.mk	-0.863953	0.894543	blue					Pav_sc0000396.1_g1100.1.mk	0.931983	0.891302	turquoise
				Pav_sc0000428.1_g330.1.mk	0.931598	0.728633	turquoise	Pav_sc0004735.1_g130.1.mk	0.863716	-0.488565	blue	Pav_sc0004735.1_g130.1.mk	0.863716	-0.648799	blue					Pav_sc0000428.1_g330.1.mk	0.931598	0.646397	turquoise
				Pav_sc0000491.1_g270.1.mk	0.931564	0.805395	turquoise	Pav_sc0000739.1_g050.1.mk	0.863499	-0.785735	blue	Pav_sc0000739.1_g050.1.mk	0.863499	-0.834939	blue					Pav_sc0000491.1_g270.1.mk	0.931564	0.788289	turquoise
				Pav_sc0000359.1_g510.1.mk	0.931494	0.729415	turquoise	Pav_sc0002287.1_g010.1.mk	0.862989	-0.725814	blue	Pav_sc0002287.1_g010.1.mk	0.862989	-0.797694	blue					Pav_sc0000359.1_g510.1.mk	0.931494	0.65707	turquoise
				Pav_sc0000848.1_g900.1.mk	0.93099	0.733264	turquoise	Pav_sc0000207.1_g1250.1.mk	0.862916	-0.523893	blue	Pav_sc0000207.1_g1250.1.mk	0.862916	-0.667767	blue					Pav_sc0000848.1_g900.1.mk	0.93099	0.667916	turquoise
				Pav_sc0001240.1_g010.1.mk	0.930832	0.788791	turquoise	Pav_sc0000130.1_g890.1.mk	0.86267	-0.657273	blue	Pav_sc0000130.1_g890.1.mk	0.86267	-0.758523	blue					Pav_sc0001240.1_g010.1.mk	0.930832	0.680303	turquoise
				Pav_sc0000721.1_g250.1.mk	0.930764	0.771591	turquoise	Pav_sc0000780.1_g270.1.mk	0.862276	-0.711889	blue	Pav_sc0000780.1_g270.1.mk	0.862276	-0.81339	blue					Pav_sc0000721.1_g250.1.mk	0.930764	0.73848	turquoise
				Pav_sc0000877.1_g850.1.mk	0.930652	0.783201	turquoise	Pav_sc0000832.1_g300.1.mk	0.862266	-0.604981	blue	Pav_sc0000832.1_g300.1.mk	0.862266	-0.741705	blue					Pav_sc0000877.1_g850.1.mk	0.930652	0.698488	turquoise
				Pav_sc0005746.1_g130.1.mk	0.93027	0.786252	turquoise	Pav_sc0000800.1_g1740.1.mk	0.862007	-0.531036	blue	Pav_sc0000800.1_g1740.1.mk	0.862007	-0.670782	blue					Pav_sc0005746.1_g130.1.mk	0.93027	0.758041	turquoise
				Pav_sc0000216.1_g620.1.mk	0.930119	0.790522	turquoise	Pav_sc0000503.1_g890.1.mk	0.861576	-0.746172	blue	Pav_sc0000503.1_g890.1.mk	0.861576	-0.79213	blue					Pav_sc0000216.1_g620.1.mk	0.930119	0.774551	turquoise
				Pav_sc0000044.1_g040.1.mk	0.929457	0.883419	turquoise	Pav_sc0000465.1_g830.1.mk	0.86117	-0.686956	blue	Pav_sc0000465.1_g830.1.mk	0.86117	-0.771548	blue					Pav_sc0000044.1_g040.1.mk	0.929457	0.862501	turquoise
				Pav_sc0000093.1_g570.1.mk	0.929427	0.749784	turquoise	Pav_sc0001181.1_g950.1.mk	0.861106	-0.654547	blue	Pav_sc0001181.1_g950.1.mk	0.861106	-0.761962	blue					Pav_sc0000093.1_g570.1.mk	0.929427	0.699777	turquoise
				Pav_sc0010449.1_g010.1.mk	0.929405	0.722488	turquoise	Pav_sc0000017.1_g1480.1.mk	0.860663	-0.538193	blue	Pav_sc0000017.1_g1480.1.mk	0.860663	-0.667697	blue					Pav_sc0010449.1_g010.1.mk	0.929405	0.640923	turquoise
				Pav_sc0000749.1_g170.1.mk	0.929386	0.805504	turquoise	Pav_sc0000491.1_g100.1.mk	-0.860662	0.838113	blue	Pav_sc0000491.1_g100.1.mk	-0.860662	0.874347	blue					Pav_sc0000749.1_g170.1.mk	0.929386	0.759404	turquoise
				Pav_sc0000157.1_g070.1.mk	0.929356	0.727617	turquoise	Pav_sc0001309.1_g1070.1.mk	0.859803	-0.816727	blue	Pav_sc0001309.1_g1070.1.mk	0.859803	-0.839228	blue					Pav_sc0000157.1_g070.1.mk	0.929356	0.647837	turquoise
				Pav_sc0000449.1_g540.1.mk	0.929201	0.719914	turquoise	novel.879	-0.859701	0.853283	blue	novel.879	-0.859701	0.880735	blue					Pav_sc0000449.1_g540.1.mk	0.929201	0.638647	turquoise
				Pav_sc0000648.1_g230.1.mk	0.929163	0.826959	turquoise	Pav_sc0001862.1_g340.1.mk	0.85961	-0.700457	blue	Pav_sc0001862.1_g340.1.mk	0.85961	-0.782149	blue					Pav_sc0000648.1_g230.1.mk	0.929163	0.705969	turquoise
				Pav_sc0000203.1_g050.1.mk	0.929028	0.851537	turquoise	Pav_sc0000583.1_g180.1.mk	0.859573	-0.809395	blue	Pav_sc0000583.1_g180.1.mk	0.859573	-0.84751	blue					Pav_sc0000203.1_g050.1.mk	0.929028	0.844001	turquoise
				Pav_sc0000890.1_g1480.1.mk	0.928834	0.746541	turquoise	Pav_sc0000886.1_g590.1.br	0.857357	-0.679265	blue	Pav_sc0000886.1_g590.1.br	0.857357	-0.771818	blue					Pav_sc0000890.1_g1480.1.mk	0.928834	0.697378	turquoise
				Pav_sc0000636.1_g250.1.mk	0.928671	0.741089	turquoise	Pav_sc0004913.1_g180.1.mk	0.857216	-0.717843	blue	Pav_sc0004913.1_g180.1.mk	0.857216	-0.815661	blue					Pav_sc0000636.1_g250.1.mk	0.928671	0.699123	turquoise
				Pav_sc0000428.1_g420.1.mk	0.928616	0.718396	turquoise	Pav_sc0000775.1_g200.1.mk	0.856972	-0.843167	blue	Pav_sc0000775.1_g200.1.mk	0.856972	-0.895444	blue					Pav_sc0000428.1_g420.1.mk	0.928616	0.639358	turquoise
				Pav_sc0000622.1_g190.1.br	0.928587	0.964344	turquoise	Pav_sc0001990.1_g140.1.mk	0.856725	-0.703554	blue	Pav_sc0001990.1_g140.1.mk	0.856725	-0.780608	blue					Pav_sc0000622.1_g190.1.br	0.928587	0.920975	turquoise
				Pav_sc0000396.1_g1090.1.mk	0.928399	0.953533	turquoise	Pav_sc0000702.1_g480.1.mk	0.85637	-0.671027	blue	Pav_sc0000702.1_g480.1.mk	0.85637	-0.761301	blue					Pav_sc0000396.1_g1090.1.mk	0.928399	0.934567	turquoise
				Pav_sc0000030.1_g530.1.br	0.928354	0.748501	turquoise	Pav_sc0000354.1_g480.1.mk	0.856037	-0.726279	blue	Pav_sc0000354.1_g480.1.mk	0.856037	-0.803698	blue					Pav_sc0000030.1_g530.1.br	0.928354	0.686351	turquoise
				novel.618	0.928214	0.738334	turquoise	Pav_sc0000766.1_g300.1.mk	0.855924	-0.581904	blue	Pav_sc0000766.1_g300.1.mk	0.855924	-0.705198	blue					novel.618	0.928214	0.664742	turquoise
				Pav_sc0000557.1_g1010.1.mk	0.9282	0.815576	turquoise	Pav_sc0001405.1_g440.1.mk	0.85579	-0.660721	blue	Pav_sc0001405.1_g440.1.mk	0.85579	-0.770473	blue					Pav_sc0000557.1_g1010.1.mk	0.9282	0.77148	turquoise
				Pav_sc0000766.1_g170.1.mk	0.928132	0.74397	turquoise	Pav_sc0000037.1_g170.1.mk	0.855686	-0.623298	blue	Pav_sc0000037.1_g170.1.mk	0.855686	-0.752573	blue					Pav_sc0000766.1_g170.1.mk	0.928132	0.713622	turquoise
				Pav_sc0001217.1_g060.1.mk	0.928091	0.756593	turquoise	Pav_sc0000370.1_g750.1.mk	0.855332	-0.48273	blue	Pav_sc0000370.1_g750.1.mk	0.855332	-0.63283	blue					Pav_sc0001217.1_g060.1.mk	0.928091	0.725822	turquoise
				Pav_sc0000719.1_g800.1.mk	0.928085	0.85254	turquoise	Pav_sc0002019.1_g060.1.mk	0.855137	-0.497015	blue	Pav_sc0002019.1_g060.1.mk	0.855137	-0.647863	blue					Pav_sc0000719.1_g800.1.mk	0.928085	0.796402	turquoise
				Pav_sc0002326.1_g270.1.mk	0.928055	0.763735	turquoise	novel.635	-0.854439	0.708459	blue	novel.635	-0.854439	0.786456	blue					Pav_sc0002326.1_g270.1.mk	0.928055	0.654138	turquoise
				Pav_sc0002181.1_g120.1.mk	0.928036	0.843789	turquoise	Pav_sc0000122.1_g070.1.mk	0.853864	-0.666243	blue	Pav_sc0000122.1_g070.1.mk	0.853864	-0.756652	blue					Pav_sc0002181.1_g120.1.mk	0.928036	0.736435	turquoise
				Pav_sc0001364.1_g030.1.mk	0.927949	0.741199	turquoise	Pav_sc0002968.1_g050.1.mk	0.853805	-0.59613	blue	Pav_sc0002968.1_g050.1.mk	0.853805	-0.719804	blue					Pav_sc0001364.1_g030.1.mk	0.927949	0.683919	turquoise
				Pav_sc0000629.1_g110.1.mk	0.927941	0.805758	turquoise	Pav_sc0001673.1_g080.1.mk	0.853246	-0.664489	blue	Pav_sc0001673.1_g080.1.mk	0.853246	-0.756667	blue					Pav_sc0000629.1_g110.1.mk	0.927941	0.693173	turquoise
				Pav_sc0002842.1_g320.1.mk	0.927855	0.934561	turquoise	Pav_sc0000474.1_g220.1.mk	0.853145	-0.569743	blue	Pav_sc0000474.1_g220.1.mk	0.853145	-0.720191	blue					Pav_sc0002842.1_g320.1.mk	0.927855	0.872501	turquoise
				Pav_sc0000410.1_g630.1.mk	0.927183	0.947408	turquoise	Pav_sc0000700.1_g860.1.mk	-0.853028	0.798002	blue	Pav_sc0000700.1_g860.1.mk	-0.853028	0.850286	blue					Pav_sc0000410.1_g630.1.mk	0.927183	0.883155	turquoise
				novel.1326	0.927171	0.8429	turquoise	Pav_sc0001925.1_g270.1.mk	0.852615	-0.56533	blue	Pav_sc0001925.1_g270.1.mk	0.852615	-0.674358	blue					novel.1326	0.927171	0.829937	turquoise
				Pav_sc0001428.1_g190.1.mk	0.926996	0.774728	turquoise	Pav_sc0000009.1_g1040.1.mk	0.852462	-0.778792	blue	Pav_sc0000009.1_g1040.1.mk	0.852462	-0.858666	blue					Pav_sc0001428.1_g190.1.mk	0.926996	0.656671	turquoise
				Pav_sc0002207.1_g030.1.mk	0.926911	0.795156	turquoise	Pav_sc0000852.1_g040.1.mk	0.852296	-0.789265	blue	Pav_sc0000852.1_g040.1.mk	0.852296	-0.839369	blue					Pav_sc0002207.1_g030.1.mk	0.926911	0.758884	turquoise
				Pav_sc0000398.1_g400.1.mk	0.926875	0.772951	turquoise	Pav_sc0001988.1_g120.1.mk	0.851736	-0.567979	blue	Pav_sc0001988.1_g120.1.mk	0.851736	-0.707165	blue					Pav_sc0000398.1_g400.1.mk	0.926875	0.729705	turquoise
				Pav_sc0000085.1_g020.1.mk	0.926843	0.787945	turquoise	Pav_sc0000540.1_g330.1.mk	0.851253	-0.799486	blue	Pav_sc0000540.1_g330.1.mk	0.851253	-0.831787	blue					Pav_sc0000085.1_g020.1.mk	0.926843	0.747443	turquoise
				Pav_sc0000754.1_g240.1.mk	0.926283	0.776593	turquoise	novel.1208	0.850876	-0.775395	blue	novel.1208	0.850876	-0.801428	blue					Pav_sc0000754.1_g240.1.mk	0.926283	0.688114	turquoise
				Pav_sc0001543.1_g160.1.br	0.925974	0.856559	turquoise	Pav_sc0000800.1_g680.1.mk	-0.850625	0.881246	blue	Pav_sc0000800.1_g680.1.mk	-0.850625	0.909471	blue					Pav_sc0001543.1_g160.1.br	0.925974	0.792595	turquoise
				Pav_sc0000977.1_g410.1.mk	0.925974	0.714114	turquoise	Pav_sc0000254.1_g1300.1.mk	0.850184	-0.537743	blue	Pav_sc0000254.1_g1300.1.mk	0.850184	-0.665002	blue					Pav_sc0000977.1_g410.1.mk	0.925974	0.62439	turquoise
				Pav_sc0000775.1_g300.1.mk	0.925916	0.721184	turquoise	Pav_sc0000979.1_g070.1.mk	0.849712	-0.826224	blue	Pav_sc0000979.1_g070.1.mk	0.849712	-0.846974	blue					Pav_sc0000775.1_g300.1.mk	0.925916	0.64099	turquoise
				Pav_sc0000299.1_g130.1.mk	0.925323	0.951348	turquoise	Pav_sc0001275.1_g560.1.mk	-0.8495	0.844252	blue	Pav_sc0001275.1_g560.1.mk	-0.8495	0.874066	blue					Pav_sc0000299.1_g130.1.mk	0.925323	0.953643	turquoise
				Pav_sc0002230.1_g070.1.mk	0.925236	0.712989	turquoise	Pav_sc0000354.1_g460.1.mk	0.849452	-0.499044	blue	Pav_sc0000354.1_g460.1.mk	0.849452	-0.645943	blue					Pav_sc0002230.1_g070.1.mk	0.925236	0.637906	turquoise
				Pav_sc0001196.1_g790.1.mk	0.925221	0.720545	turquoise	Pav_sc0001583.1_g040.1.br	0.847915	-0.571441	blue	Pav_sc0001583.1_g040.1.br	0.847915	-0.685019	blue					Pav_sc0001196.1_g790.1.mk	0.925221	0.654051	turquoise
				Pav_sc0000877.1_g480.1.mk	0.92506	0.71929	turquoise	Pav_sc0000093.1_g660.1.mk	0.847858	-0.516102	blue	Pav_sc0000093.1_g660.1.mk	0.847858	-0.627901	blue					Pav_sc0000877.1_g480.1.mk	0.92506	0.654286	turquoise
				Pav_sc0000103.1_g590.1.mk	0.925027	0.844171	turquoise	Pav_sc0000095.1_g980.1.mk	0.847847	-0.466155	blue	Pav_sc0000095.1_g980.1.mk	0.847847	-0.647281	blue					Pav_sc0000103.1_g590.1.mk	0.925027	0.830814	turquoise
				Pav_sc0000130.1_g570.1.mk	0.924593	0.769132	turquoise	Pav_sc0001243.1_g520.1.mk	-0.847759	0.764556	blue	Pav_sc0001243.1_g520.1.mk	-0.847759	0.823893	blue					Pav_sc0000130.1_g570.1.mk	0.924593	0.760222	turquoise
				Pav_sc0000484.1_g430.1.mk	0.924529	0.817976	turquoise	Pav_sc0001243.1_g510.1.mk	-0.847363	0.829365	blue	Pav_sc0001243.1_g510.1.mk	-0.847363	0.877615	blue					Pav_sc0000484.1_g430.1.mk	0.924529	0.763399	turquoise
				Pav_sc0000130.1_g200.1.mk	0.924523	0.716598	turquoise	novel.950	-0.84724	0.47394	blue	novel.950	-0.84724	0.65838	blue					Pav_sc0000130.1_g200.1.mk	0.924523	0.652876	turquoise
				Pav_sc0000410.1_g510.1.mk	0.924456	0.716713	turquoise	Pav_sc0002654.1_g010.1.mk	0.847185	-0.850477	blue	Pav_sc0002654.1_g010.1.mk	0.847185	-0.862421	blue					Pav_sc0000410.1_g510.1.mk	0.924456	0.634894	turquoise
				Pav_sc0006812.1_g030.1.mk	0.92437	0.767757	turquoise	Pav_sc0001272.1_g010.1.mk	0.847067	-0.776064	blue	Pav_sc0001272.1_g010.1.mk	0.847067	-0.838554	blue					Pav_sc0006812.1_g030.1.mk	0.92437	0.744722	turquoise
				Pav_sc0000813.1_g200.1.mk	0.924185	0.783632	turquoise	Pav_sc0000451.1_g200.1.mk	0.846402	-0.766525	blue	Pav_sc0000451.1_g200.1.mk	0.846402	-0.83554	blue					Pav_sc0000813.1_g200.1.mk	0.924185	0.747543	turquoise
				Pav_sc0001305.1_g510.1.mk	0.924177	0.861322	turquoise	Pav_sc0000800.1_g1090.1.mk	0.846387	-0.675037	blue	Pav_sc0000800.1_g1090.1.mk	0.846387	-0.758905	blue					Pav_sc0001305.1_g510.1.mk	0.924177	0.791535	turquoise
				Pav_sc0000113.1_g370.1.mk	0.924171	0.723686	turquoise	Pav_sc0002233.1_g100.1.mk	0.846274	-0.504129	blue	Pav_sc0002233.1_g100.1.mk	0.846274	-0.67787	blue					Pav_sc0000113.1_g370.1.mk	0.924171	0.650429	turquoise
				Pav_sc0002326.1_g220.1.mk	0.924153	0.937394	turquoise	Pav_sc0000586.1_g550.1.mk	0.845896	-0.557827	blue	Pav_sc0000586.1_g550.1.mk	0.845896	-0.690122	blue					Pav_sc0002326.1_g220.1.mk	0.924153	0.909448	turquoise
				Pav_sc0000617.1_g130.1.mk	0.923928	0.918271	turquoise	Pav_sc0002206.1_g030.1.mk	0.845824	-0.647417	blue	Pav_sc0002206.1_g030.1.mk	0.845824	-0.733944	blue					Pav_sc0000617.1_g130.1.mk	0.923928	0.860844	turquoise
				Pav_sc0000998.1_g170.1.mk	0.923648	0.893448	turquoise	Pav_sc0001169.1_g140.1.mk	0.844116	-0.543638	blue	Pav_sc0001169.1_g140.1.mk	0.844116	-0.691071	blue					Pav_sc0000998.1_g170.1.mk	0.923648	0.846755	turquoise
				Pav_sc0000164.1_g200.1.br	0.923549	0.820541	turquoise	Pav_sc0000907.1_g580.1.mk	0.84399	-0.657915	blue	Pav_sc0000907.1_g580.1.mk	0.84399	-0.779675	blue					Pav_sc0000164.1_g200.1.br	0.923549	0.7342	turquoise
				Pav_sc0000102.1_g220.1.mk	0.923456	0.898568	turquoise	Pav_sc0002475.1_g240.1.mk	0.843102	-0.518843	blue	Pav_sc0002475.1_g240.1.mk	0.843102	-0.667425	blue					Pav_sc0000102.1_g220.1.mk	0.923456	0.878709	turquoise
				Pav_sc0000497.1_g270.1.mk	0.923283	0.910255	turquoise	Pav_sc0000848.1_g780.1.mk	0.842618	-0.830764	blue	Pav_sc0000848.1_g780.1.mk	0.842618	-0.866975	blue					Pav_sc0000497.1_g270.1.mk	0.923283	0.846322	turquoise
				Pav_sc0000072.1_g010.1.mk	0.923085	0.896326	turquoise	Pav_sc0011251.1_g010.1.mk	0.842575	-0.676641	blue	Pav_sc0011251.1_g010.1.mk	0.842575	-0.760301	blue					Pav_sc0000072.1_g010.1.mk	0.923085	0.895209	turquoise
				Pav_sc0001825.1_g250.1.mk	0.922973	0.859673	turquoise	Pav_sc0000740.1_g210.1.mk	-0.842362	0.667463	blue	Pav_sc0000740.1_g210.1.mk	-0.842362	0.752827	blue					Pav_sc0001825.1_g250.1.mk	0.922973	0.783235	turquoise
				Pav_sc0002337.1_g030.1.br	0.922945	0.707613	turquoise	Pav_sc0000624.1_g1160.1.mk	0.841618	-0.608693	blue	Pav_sc0000624.1_g1160.1.mk	0.841618	-0.727613	blue					Pav_sc0002337.1_g030.1.br	0.922945	0.637588	turquoise
				Pav_sc0000405.1_g540.1.mk	0.922693	0.705072	turquoise	Pav_sc0001229.1_g060.1.br	-0.84101	0.68664	blue	Pav_sc0001229.1_g060.1.br	-0.84101	0.755625	blue					Pav_sc0000405.1_g540.1.mk	0.922693	0.631137	turquoise
				Pav_sc0000624.1_g2220.1.mk	0.922607	0.884389	turquoise	Pav_sc0000382.1_g010.1.mk	0.840659	-0.749517	blue	Pav_sc0000382.1_g010.1.mk	0.840659	-0.824488	blue					Pav_sc0000624.1_g2220.1.mk	0.922607	0.839736	turquoise
				Pav_sc0000112.1_g100.1.mk	0.922603	0.707132	turquoise	Pav_sc0003135.1_g350.1.mk	0.840167	-0.511166	blue	Pav_sc0003135.1_g350.1.mk	0.840167	-0.637748	blue					Pav_sc0000112.1_g100.1.mk	0.922603	0.630534	turquoise
				Pav_sc0001405.1_g1310.1.mk	0.922559	0.952645	turquoise	Pav_sc0006098.1_g030.1.mk	0.839123	-0.820868	blue	Pav_sc0006098.1_g030.1.mk	0.839123	-0.849205	blue					Pav_sc0001405.1_g1310.1.mk	0.922559	0.919314	turquoise
				Pav_sc0001102.1_g1120.1.mk	0.922477	0.753335	turquoise	Pav_sc0000984.1_g010.1.mk	0.83912	-0.632777	blue	Pav_sc0000984.1_g010.1.mk	0.83912	-0.760668	blue					Pav_sc0001102.1_g1120.1.mk	0.922477	0.732988	turquoise
				Pav_sc0000164.1_g170.1.mk	0.922381	0.942151	turquoise	Pav_sc0000062.1_g390.1.mk	0.838878	-0.580849	blue	Pav_sc0000062.1_g390.1.mk	0.838878	-0.695445	blue					Pav_sc0000164.1_g170.1.mk	0.922381	0.848792	turquoise
				Pav_sc0000251.1_g130.1.br	0.922321	0.718307	turquoise	Pav_sc0000599.1_g210.1.mk	0.838516	-0.551181	blue	Pav_sc0000599.1_g210.1.mk	0.838516	-0.683293	blue					Pav_sc0000251.1_g130.1.br	0.922321	0.656436	turquoise
				Pav_sc0000396.1_g510.1.mk	0.922156	0.750366	turquoise	Pav_sc0002722.1_g290.1.mk	0.838459	-0.758771	blue	Pav_sc0002722.1_g290.1.mk	0.838459	-0.835001	blue					Pav_sc0000396.1_g510.1.mk	0.922156	0.653879	turquoise
				Pav_sc0000736.1_g050.1.mk	0.922099	0.861723	turquoise	Pav_sc0000375.1_g780.1.mk	-0.837848	0.805535	blue	Pav_sc0000375.1_g780.1.mk	-0.837848	0.83819	blue					Pav_sc0000736.1_g050.1.mk	0.922099	0.829763	turquoise
				Pav_sc0000124.1_g090.1.br	0.921896	0.874457	turquoise	Pav_sc0003578.1_g010.1.mk	0.837844	-0.665887	blue	Pav_sc0003578.1_g010.1.mk	0.837844	-0.735734	blue					Pav_sc0000124.1_g090.1.br	0.921896	0.80131	turquoise
				Pav_sc0002319.1_g030.1.mk	0.921888	0.955676	turquoise	Pav_sc0000464.1_g080.1.mk	0.8377	-0.552662	blue	Pav_sc0000464.1_g080.1.mk	0.8377	-0.691771	blue					Pav_sc0002319.1_g030.1.mk	0.921888	0.959519	turquoise
				Pav_sc0000886.1_g070.1.mk	0.921828	0.900455	turquoise	Pav_sc0000594.1_g050.1.mk	0.837675	-0.738977	blue	Pav_sc0000594.1_g050.1.mk	0.837675	-0.813777	blue					Pav_sc0000886.1_g070.1.mk	0.921828	0.875018	turquoise
				Pav_sc0001015.1_g310.1.mk	0.921576	0.717983	turquoise	Pav_sc0000138.1_g170.1.mk	0.837406	-0.653048	blue	Pav_sc0000138.1_g170.1.mk	0.837406	-0.7083	blue					Pav_sc0001015.1_g310.1.mk	0.921576	0.64181	turquoise
				Pav_sc0000103.1_g1170.1.mk	0.921447	0.791152	turquoise	Pav_sc0001974.1_g020.1.mk	0.836974	-0.639005	blue	Pav_sc0001974.1_g020.1.mk	0.836974	-0.776177	blue					Pav_sc0000103.1_g1170.1.mk	0.921447	0.761247	turquoise
				Pav_sc0000501.1_g180.1.br	0.920871	0.741243	turquoise	Pav_sc0003756.1_g090.1.mk	0.836961	-0.845477	blue	Pav_sc0003756.1_g090.1.mk	0.836961	-0.855635	blue					Pav_sc0000501.1_g180.1.br	0.920871	0.704167	turquoise
				Pav_sc0000293.1_g110.1.mk	0.920711	0.780258	turquoise	Pav_sc0000147.1_g060.1.br	0.836689	-0.66674	blue	Pav_sc0000147.1_g060.1.br	0.836689	-0.762233	blue					Pav_sc0000293.1_g110.1.mk	0.920711	0.757974	turquoise
				Pav_sc0001236.1_g180.1.mk	0.920607	0.726632	turquoise	Pav_sc0000877.1_g070.1.mk	0.836412	-0.79418	blue	Pav_sc0000877.1_g070.1.mk	0.836412	-0.849933	blue					Pav_sc0001236.1_g180.1.mk	0.920607	0.640051	turquoise
				Pav_sc0000584.1_g680.1.mk	0.920559	0.858303	turquoise	Pav_sc0000474.1_g140.1.mk	0.836379	-0.526266	blue	Pav_sc0000474.1_g140.1.mk	0.836379	-0.635842	blue					Pav_sc0000584.1_g680.1.mk	0.920559	0.818436	turquoise
				Pav_sc0002914.1_g030.1.mk	0.920548	0.72152	turquoise	Pav_sc0001405.1_g170.1.mk	0.836318	-0.804438	blue	Pav_sc0001405.1_g170.1.mk	0.836318	-0.85949	blue					Pav_sc0002914.1_g030.1.mk	0.920548	0.67425	turquoise
				novel.132	0.920511	0.741068	turquoise	Pav_sc0000702.1_g310.1.mk	0.836133	-0.887807	blue	Pav_sc0000702.1_g310.1.mk	0.836133	-0.88795	blue					novel.132	0.920511	0.691384	turquoise
				Pav_sc0001859.1_g260.1.br	0.920488	0.714785	turquoise	Pav_sc0000040.1_g340.1.mk	0.835759	-0.577163	blue	Pav_sc0000040.1_g340.1.mk	0.835759	-0.71213	blue					Pav_sc0001859.1_g260.1.br	0.920488	0.640201	turquoise
				Pav_sc0001518.1_g080.1.mk	0.920419	0.844716	turquoise	Pav_sc0000065.1_g010.1.mk	0.834541	-0.563069	blue	Pav_sc0000065.1_g010.1.mk	0.834541	-0.656336	blue					Pav_sc0001518.1_g080.1.mk	0.920419	0.862482	turquoise
				Pav_sc0000823.1_g190.1.mk	0.920412	0.887918	turquoise	Pav_sc0001763.1_g250.1.br	0.834364	-0.749428	blue	Pav_sc0001763.1_g250.1.br	0.834364	-0.788475	blue					Pav_sc0000823.1_g190.1.mk	0.920412	0.865517	turquoise
				Pav_sc0003836.1_g010.1.br	0.920238	0.833205	turquoise	Pav_sc0000480.1_g730.1.mk	0.833988	-0.497807	blue	Pav_sc0000480.1_g730.1.mk	0.833988	-0.62424	blue					Pav_sc0003836.1_g010.1.br	0.920238	0.815825	turquoise
				Pav_sc0002360.1_g1010.1.br	0.920197	0.787122	turquoise	Pav_sc0000045.1_g220.1.mk	0.833831	-0.832422	blue	Pav_sc0000045.1_g220.1.mk	0.833831	-0.857359	blue					Pav_sc0002360.1_g1010.1.br	0.920197	0.666805	turquoise
				Pav_sc0000652.1_g500.1.mk	0.919993	0.754781	turquoise	Pav_sc0002348.1_g110.1.mk	-0.833513	0.770588	blue	Pav_sc0002348.1_g110.1.mk	-0.833513	0.82039	blue					Pav_sc0000652.1_g500.1.mk	0.919993	0.708967	turquoise
				novel.598	0.919715	0.73852	turquoise	Pav_sc0001710.1_g450.1.mk	-0.832309	0.805225	blue	Pav_sc0001710.1_g450.1.mk	-0.832309	0.880308	blue					novel.598	0.919715	0.675374	turquoise
				Pav_sc0001196.1_g080.1.mk	0.919593	0.822962	turquoise	Pav_sc0000153.1_g020.1.mk	-0.832179	0.771587	blue	Pav_sc0000153.1_g020.1.mk	-0.832179	0.824596	blue					Pav_sc0001196.1_g080.1.mk	0.919593	0.761599	turquoise
				Pav_sc0001305.1_g500.1.mk	0.919311	0.898084	turquoise	Pav_sc0000103.1_g1480.1.mk	0.83197	-0.795512	blue	Pav_sc0000103.1_g1480.1.mk	0.83197	-0.807672	blue					Pav_sc0001305.1_g500.1.mk	0.919311	0.866795	turquoise
				Pav_co4005701.1_g010.1.mk	0.918959	0.737734	turquoise	Pav_sc0002001.1_g020.1.mk	0.830923	-0.597778	blue	Pav_sc0002001.1_g020.1.mk	0.830923	-0.708067	blue					Pav_co4005701.1_g010.1.mk	0.918959	0.677933	turquoise
				novel.61	0.918709	0.951055	turquoise	Pav_sc0000212.1_g900.1.mk	0.830754	-0.783468	blue	Pav_sc0000212.1_g900.1.mk	0.830754	-0.827539	blue					novel.61	0.918709	0.88318	turquoise
				Pav_sc0007696.1_g040.1.mk	0.918633	0.754772	turquoise	Pav_sc0000220.1_g1660.1.mk	0.830518	-0.711992	blue	Pav_sc0000220.1_g1660.1.mk	0.830518	-0.825557	blue					Pav_sc0007696.1_g040.1.mk	0.918633	0.688828	turquoise
				Pav_sc0002360.1_g950.1.mk	0.918524	0.854119	turquoise	novel.1046	-0.830391	0.741489	blue	novel.1046	-0.830391	0.790316	blue					Pav_sc0002360.1_g950.1.mk	0.918524	0.729574	turquoise
				Pav_sc0000800.1_g1050.1.mk	0.91852	0.915725	turquoise	Pav_sc0001925.1_g370.1.mk	0.83035	-0.763975	blue	Pav_sc0001925.1_g370.1.mk	0.83035	-0.785778	blue					Pav_sc0000800.1_g1050.1.mk	0.91852	0.879696	turquoise
				Pav_sc0002208.1_g600.1.mk	0.918502	0.713758	turquoise	Pav_sc0000567.1_g490.1.mk	0.830339	-0.80436	blue	Pav_sc0000567.1_g490.1.mk	0.830339	-0.824402	blue					Pav_sc0002208.1_g600.1.mk	0.918502	0.641917	turquoise
				Pav_sc0000683.1_g050.1.mk	0.918441	0.818437	turquoise	Pav_sc0000040.1_g300.1.br	0.829038	-0.595441	blue	Pav_sc0000040.1_g300.1.br	0.829038	-0.725182	blue					Pav_sc0000683.1_g050.1.mk	0.918441	0.682337	turquoise
				Pav_sc0000103.1_g1530.1.mk	0.918366	0.714523	turquoise	Pav_sc0001205.1_g420.1.mk	0.828298	-0.804202	blue	Pav_sc0001205.1_g420.1.mk	0.828298	-0.803183	blue					Pav_sc0000103.1_g1530.1.mk	0.918366	0.646182	turquoise
				Pav_sc0000488.1_g490.1.mk	0.918343	0.955869	turquoise	Pav_sc0000766.1_g290.1.mk	0.827851	-0.55948	blue	Pav_sc0000766.1_g290.1.mk	0.827851	-0.672816	blue					Pav_sc0000488.1_g490.1.mk	0.918343	0.911155	turquoise
				Pav_sc0000908.1_g230.1.mk	0.918094	0.818715	turquoise	Pav_sc0001309.1_g230.1.mk	0.826881	-0.836059	blue	Pav_sc0001309.1_g230.1.mk	0.826881	-0.872364	blue					Pav_sc0000908.1_g230.1.mk	0.918094	0.817352	turquoise
				Pav_sc0002318.1_g130.1.br	0.917535	0.703775	turquoise	Pav_sc0000216.1_g070.1.mk	0.826628	-0.865382	blue	Pav_sc0000216.1_g070.1.mk	0.826628	-0.890105	blue					Pav_sc0002318.1_g130.1.br	0.917535	0.618587	turquoise
				Pav_sc0005418.1_g100.1.mk	0.917413	0.71635	turquoise	Pav_sc0000009.1_g580.1.mk	0.82623	-0.54543	blue	Pav_sc0000009.1_g580.1.mk	0.82623	-0.681244	blue					Pav_sc0005418.1_g100.1.mk	0.917413	0.676678	turquoise
				Pav_sc0000370.1_g1010.1.mk	0.917409	0.875588	turquoise	novel.818	-0.82592	0.767791	blue	novel.818	-0.82592	0.821537	blue					Pav_sc0000370.1_g1010.1.mk	0.917409	0.830701	turquoise
				Pav_sc0002360.1_g790.1.mk	0.917181	0.762329	turquoise	Pav_sc0000017.1_g020.1.mk	0.82511	-0.604253	blue	Pav_sc0000017.1_g020.1.mk	0.82511	-0.680072	blue					Pav_sc0002360.1_g790.1.mk	0.917181	0.708833	turquoise
				Pav_sc0000480.1_g910.1.mk	0.917131	0.726685	turquoise	Pav_sc0000886.1_g330.1.mk	0.82482	-0.71964	blue	Pav_sc0000886.1_g330.1.mk	0.82482	-0.79869	blue					Pav_sc0000480.1_g910.1.mk	0.917131	0.663769	turquoise
				Pav_sc0003434.1_g240.1.mk	0.917062	0.929857	turquoise	Pav_sc0004467.1_g060.1.mk	0.824224	-0.568481	blue	Pav_sc0004467.1_g060.1.mk	0.824224	-0.680639	blue					Pav_sc0003434.1_g240.1.mk	0.917062	0.892619	turquoise
				Pav_sc0000085.1_g340.1.mk	0.916992	0.896586	turquoise	Pav_sc0000094.1_g040.1.mk	-0.823834	0.765215	blue	Pav_sc0000094.1_g040.1.mk	-0.823834	0.808234	blue					Pav_sc0000085.1_g340.1.mk	0.916992	0.805073	turquoise
				Pav_sc0000977.1_g150.1.mk	0.916846	0.726778	turquoise	Pav_sc0000292.1_g050.1.mk	-0.82366	0.831101	blue	Pav_sc0000292.1_g050.1.mk	-0.82366	0.847814	blue					Pav_sc0000977.1_g150.1.mk	0.916846	0.677716	turquoise
				Pav_sc0002125.1_g080.1.mk	0.916784	0.703652	turquoise	Pav_sc0001724.1_g050.1.mk	-0.823574	0.798014	blue	Pav_sc0001724.1_g050.1.mk	-0.823574	0.810238	blue					Pav_sc0002125.1_g080.1.mk	0.916784	0.63306	turquoise
				Pav_sc0000102.1_g210.1.mk	0.916772	0.694113	turquoise	Pav_sc0000129.1_g1710.1.mk	0.822479	-0.641119	blue	Pav_sc0000129.1_g1710.1.mk	0.822479	-0.727145	blue					Pav_sc0000102.1_g210.1.mk	0.916772	0.617781	turquoise
				Pav_sc0000085.1_g330.1.mk	0.916771	0.785524	turquoise	Pav_sc0004613.1_g010.1.br	0.821996	-0.685391	blue	Pav_sc0004613.1_g010.1.br	0.821996	-0.763828	blue					Pav_sc0000085.1_g330.1.mk	0.916771	0.778214	turquoise
				Pav_sc0000852.1_g590.1.mk	0.916771	0.912043	turquoise	Pav_sc0000744.1_g250.1.mk	0.821939	-0.8098	blue	Pav_sc0000744.1_g250.1.mk	0.821939	-0.856127	blue					Pav_sc0000852.1_g590.1.mk	0.916771	0.911536	turquoise
				Pav_sc0001112.1_g080.1.br	0.916553	0.819414	turquoise	novel.1056	0.821759	-0.615658	blue	novel.1056	0.821759	-0.730708	blue					Pav_sc0001112.1_g080.1.br	0.916553	0.739134	turquoise
				Pav_sc0000890.1_g1290.1.mk	0.916461	0.907767	turquoise	Pav_sc0000093.1_g600.1.mk	0.821227	-0.546467	blue	Pav_sc0000093.1_g600.1.mk	0.821227	-0.685454	blue					Pav_sc0000890.1_g1290.1.mk	0.916461	0.818056	turquoise
				Pav_sc0000620.1_g060.1.br	0.915914	0.951523	turquoise	Pav_sc0001305.1_g160.1.mk	0.820953	-0.547231	blue	Pav_sc0001305.1_g160.1.mk	0.820953	-0.667146	blue					Pav_sc0000620.1_g060.1.br	0.915914	0.895599	turquoise
				Pav_sc0000780.1_g360.1.mk	0.915874	0.953089	turquoise	Pav_sc0004181.1_g040.1.mk	0.820945	-0.721066	blue	Pav_sc0004181.1_g040.1.mk	0.820945	-0.769794	blue					Pav_sc0000780.1_g360.1.mk	0.915874	0.917576	turquoise
				Pav_sc0002934.1_g040.1.mk	0.915819	0.777918	turquoise	Pav_sc0000023.1_g650.1.mk	0.820331	-0.837085	blue	Pav_sc0000023.1_g650.1.mk	0.820331	-0.841206	blue					Pav_sc0002934.1_g040.1.mk	0.915819	0.684812	turquoise
				Pav_sc0001175.1_g090.1.mk	0.915651	0.862867	turquoise	Pav_sc0000028.1_g470.1.mk	0.819923	-0.478415	blue	Pav_sc0000028.1_g470.1.mk	0.819923	-0.629236	blue					Pav_sc0001175.1_g090.1.mk	0.915651	0.877065	turquoise
				Pav_sc0006064.1_g050.1.mk	0.915621	0.755397	turquoise	Pav_sc0001883.1_g220.1.br	0.819592	-0.510594	blue	Pav_sc0001883.1_g220.1.br	0.819592	-0.614205	blue					Pav_sc0006064.1_g050.1.mk	0.915621	0.70518	turquoise
				Pav_sc0000652.1_g1140.1.mk	0.915227	0.701674	turquoise	Pav_sc0000174.1_g270.1.mk	0.819306	-0.585654	blue	Pav_sc0000174.1_g270.1.mk	0.819306	-0.722237	blue					Pav_sc0000652.1_g1140.1.mk	0.915227	0.628697	turquoise
				Pav_sc0000095.1_g940.1.mk	0.915109	0.909813	turquoise	Pav_sc0000096.1_g350.1.mk	0.819225	-0.691612	blue	Pav_sc0000096.1_g350.1.mk	0.819225	-0.743427	blue					Pav_sc0000095.1_g940.1.mk	0.915109	0.90124	turquoise
				Pav_sc0004354.1_g100.1.mk	0.914951	0.737878	turquoise	Pav_sc0001073.1_g030.1.mk	0.81909	-0.533502	blue	Pav_sc0001073.1_g030.1.mk	0.81909	-0.636016	blue					Pav_sc0004354.1_g100.1.mk	0.914951	0.682726	turquoise
				Pav_sc0000017.1_g010.1.mk	0.914884	0.701568	turquoise	Pav_sc0001411.1_g640.1.mk	0.817557	-0.527937	blue	Pav_sc0001411.1_g640.1.mk	0.817557	-0.629633	blue					Pav_sc0000017.1_g010.1.mk	0.914884	0.623695	turquoise
				Pav_sc0000813.1_g140.1.mk	0.91465	0.714554	turquoise	Pav_sc0000852.1_g050.1.mk	0.816834	-0.493944	blue	Pav_sc0000852.1_g050.1.mk	0.816834	-0.620711	blue					Pav_sc0000813.1_g140.1.mk	0.91465	0.646883	turquoise
				Pav_sc0001073.1_g130.1.mk	0.91461	0.715987	turquoise	Pav_sc0000143.1_g520.1.mk	0.816148	-0.719967	blue	Pav_sc0000143.1_g520.1.mk	0.816148	-0.76844	blue					Pav_sc0001073.1_g130.1.mk	0.91461	0.651913	turquoise
				Pav_sc0000030.1_g990.1.mk	0.914557	0.908314	turquoise	Pav_sc0002206.1_g340.1.mk	0.815771	-0.439721	blue	Pav_sc0002206.1_g340.1.mk	0.815771	-0.607644	blue					Pav_sc0000030.1_g990.1.mk	0.914557	0.853676	turquoise
				Pav_sc0000009.1_g080.1.mk	0.914532	0.926816	turquoise	Pav_sc0001710.1_g260.1.mk	-0.815078	0.573789	blue	Pav_sc0001710.1_g260.1.mk	-0.815078	0.681675	blue					Pav_sc0000009.1_g080.1.mk	0.914532	0.926708	turquoise
				Pav_sc0001248.1_g460.1.mk	0.914483	0.853279	turquoise	Pav_sc0000586.1_g500.1.mk	-0.814835	0.787851	blue	Pav_sc0000586.1_g500.1.mk	-0.814835	0.814169	blue					Pav_sc0001248.1_g460.1.mk	0.914483	0.874917	turquoise
				Pav_sc0001112.1_g090.1.br	0.914427	0.696133	turquoise	Pav_sc0000412.1_g230.1.mk	-0.814687	0.506158	blue	Pav_sc0000412.1_g230.1.mk	-0.814687	0.65187	blue					Pav_sc0001112.1_g090.1.br	0.914427	0.61232	turquoise
				Pav_sc0001289.1_g440.1.mk	0.91442	0.910553	turquoise	Pav_sc0000174.1_g680.1.mk	0.813467	-0.690862	blue	Pav_sc0000174.1_g680.1.mk	0.813467	-0.757651	blue					Pav_sc0001289.1_g440.1.mk	0.91442	0.861654	turquoise
				Pav_sc0000084.1_g550.1.mk	0.914402	0.866133	turquoise	Pav_sc0000772.1_g060.1.mk	-0.812484	0.881326	blue	Pav_sc0000772.1_g060.1.mk	-0.812484	0.891009	blue					Pav_sc0000084.1_g550.1.mk	0.914402	0.846796	turquoise
				Pav_sc0000983.1_g450.1.mk	0.914237	0.725612	turquoise	Pav_sc0001988.1_g200.1.mk	0.812241	-0.617402	blue	Pav_sc0001988.1_g200.1.mk	0.812241	-0.68232	blue					Pav_sc0000983.1_g450.1.mk	0.914237	0.595212	turquoise
				Pav_sc0000220.1_g010.1.br	0.914062	0.697858	turquoise	Pav_sc0000704.1_g390.1.mk	-0.812096	0.607621	blue	Pav_sc0000704.1_g390.1.mk	-0.812096	0.702061	blue					Pav_sc0000220.1_g010.1.br	0.914062	0.628374	turquoise
				Pav_sc0002024.1_g080.1.mk	0.913929	0.946019	turquoise	Pav_sc0000112.1_g010.1.br	0.812042	-0.613409	blue	Pav_sc0000112.1_g010.1.br	0.812042	-0.690148	blue					Pav_sc0002024.1_g080.1.mk	0.913929	0.917465	turquoise
				Pav_sc0001243.1_g410.1.br	0.913877	0.774013	turquoise	Pav_sc0001157.1_g030.1.mk	0.811651	-0.628517	blue	Pav_sc0001157.1_g030.1.mk	0.811651	-0.750774	blue					Pav_sc0001243.1_g410.1.br	0.913877	0.712609	turquoise
				Pav_sc0001405.1_g1950.1.br	0.913538	0.806286	turquoise	Pav_sc0002772.1_g130.1.mk	0.811024	-0.765822	blue	Pav_sc0002772.1_g130.1.mk	0.811024	-0.806064	blue					Pav_sc0001405.1_g1950.1.br	0.913538	0.79477	turquoise
				Pav_sc0000557.1_g1040.1.mk	0.913436	0.802465	turquoise	Pav_sc0000852.1_g1200.1.mk	-0.810435	0.673975	blue	Pav_sc0000852.1_g1200.1.mk	-0.810435	0.772496	blue					Pav_sc0000557.1_g1040.1.mk	0.913436	0.697462	turquoise
				Pav_sc0000201.1_g300.1.mk	0.913104	0.761317	turquoise	Pav_sc0000488.1_g340.1.mk	0.810013	-0.636554	blue	Pav_sc0000488.1_g340.1.mk	0.810013	-0.673605	blue					Pav_sc0000201.1_g300.1.mk	0.913104	0.67799	turquoise
				Pav_sc0002388.1_g080.1.mk	0.913093	0.845436	turquoise	Pav_sc0012106.1_g010.1.mk	0.809945	-0.710908	blue	Pav_sc0012106.1_g010.1.mk	0.809945	-0.787276	blue					Pav_sc0002388.1_g080.1.mk	0.913093	0.720745	turquoise
				Pav_sc0000747.1_g070.1.mk	0.912948	0.882296	turquoise	Pav_sc0000449.1_g420.1.mk	0.809939	-0.451015	blue	Pav_sc0000449.1_g420.1.mk	0.809939	-0.596599	blue					Pav_sc0000747.1_g070.1.mk	0.912948	0.862921	turquoise
				Pav_sc0000915.1_g130.1.br	0.912948	0.722821	turquoise	Pav_sc0000037.1_g470.1.mk	0.80966	-0.726648	blue	Pav_sc0000037.1_g470.1.mk	0.80966	-0.79856	blue					Pav_sc0000915.1_g130.1.br	0.912948	0.647408	turquoise
				novel.153	0.912864	0.93477	turquoise	Pav_sc0000103.1_g2040.1.mk	0.809502	-0.734817	blue	Pav_sc0000103.1_g2040.1.mk	0.809502	-0.786315	blue					novel.153	0.912864	0.915098	turquoise
				Pav_sc0000017.1_g1200.1.mk	0.912735	0.733785	turquoise	Pav_sc0000042.1_g420.1.mk	0.809477	-0.629092	blue	Pav_sc0000042.1_g420.1.mk	0.809477	-0.771897	blue					Pav_sc0000017.1_g1200.1.mk	0.912735	0.671453	turquoise
				Pav_sc0001576.1_g300.1.mk	0.912685	0.68791	turquoise	Pav_sc0000502.1_g520.1.mk	0.809235	-0.718387	blue	Pav_sc0000502.1_g520.1.mk	0.809235	-0.810886	blue					Pav_sc0001576.1_g300.1.mk	0.912685	0.6141	turquoise
				Pav_sc0000525.1_g420.1.mk	0.912663	0.694588	turquoise	Pav_sc0002231.1_g050.1.br	0.808872	-0.486261	blue	Pav_sc0002231.1_g050.1.br	0.808872	-0.629381	blue					Pav_sc0000525.1_g420.1.mk	0.912663	0.617834	turquoise
				Pav_sc0000679.1_g150.1.br	0.912281	0.710288	turquoise	novel.385	0.808521	-0.740674	blue	novel.385	0.808521	-0.81715	blue					Pav_sc0000679.1_g150.1.br	0.912281	0.608551	turquoise
				Pav_sc0004303.1_g150.1.mk	0.912078	0.728046	turquoise	Pav_sc0002318.1_g350.1.mk	0.807078	-0.81849	blue	Pav_sc0002318.1_g350.1.mk	0.807078	-0.820178	blue					Pav_sc0004303.1_g150.1.mk	0.912078	0.633176	turquoise
				Pav_sc0000212.1_g1070.1.mk	0.912028	0.769594	turquoise	Pav_co4000579.1_g010.1.mk	0.806019	-0.572321	blue	Pav_co4000579.1_g010.1.mk	0.806019	-0.701556	blue					Pav_sc0000212.1_g1070.1.mk	0.912028	0.667806	turquoise
				Pav_sc0000744.1_g400.1.mk	0.911966	0.698577	turquoise	Pav_sc0001580.1_g260.1.mk	0.805306	-0.40597	blue	Pav_sc0001580.1_g260.1.mk	0.805306	-0.577395	blue					Pav_sc0000744.1_g400.1.mk	0.911966	0.593875	turquoise
				Pav_sc0000254.1_g240.1.mk	0.911706	0.919283	turquoise	novel.339	0.80512	-0.784735	blue	novel.339	0.80512	-0.851938	blue					Pav_sc0000254.1_g240.1.mk	0.911706	0.866266	turquoise
				Pav_sc0001411.1_g730.1.mk	0.911523	0.725473	turquoise	Pav_sc0001105.1_g220.1.mk	0.804269	-0.838493	blue	Pav_sc0001105.1_g220.1.mk	0.804269	-0.85498	blue					Pav_sc0001411.1_g730.1.mk	0.911523	0.64959	turquoise
				Pav_sc0000766.1_g240.1.mk	0.911417	0.882283	turquoise	Pav_sc0000376.1_g050.1.mk	0.804208	-0.592242	blue	Pav_sc0000376.1_g050.1.mk	0.804208	-0.680205	blue					Pav_sc0000766.1_g240.1.mk	0.911417	0.820293	turquoise
				Pav_sc0002118.1_g060.1.mk	0.911227	0.911008	turquoise	Pav_sc0009301.1_g030.1.mk	0.804106	-0.753164	blue	Pav_sc0009301.1_g030.1.mk	0.804106	-0.807762	blue					Pav_sc0002118.1_g060.1.mk	0.911227	0.840645	turquoise
				Pav_sc0000600.1_g360.1.mk	0.911172	0.818466	turquoise	Pav_sc0002208.1_g880.1.mk	0.80395	-0.774203	blue	Pav_sc0002208.1_g880.1.mk	0.80395	-0.816903	blue					Pav_sc0000600.1_g360.1.mk	0.911172	0.735835	turquoise
				Pav_sc0001098.1_g050.1.br	0.910583	0.934404	turquoise	Pav_sc0000290.1_g110.1.mk	-0.803302	0.767701	blue	Pav_sc0000290.1_g110.1.mk	-0.803302	0.75948	blue					Pav_sc0001098.1_g050.1.br	0.910583	0.924291	turquoise
				Pav_sc0000977.1_g090.1.mk	0.910482	0.879835	turquoise	Pav_sc0000675.1_g750.1.mk	0.803059	-0.792126	blue	Pav_sc0000675.1_g750.1.mk	0.803059	-0.8446	blue					Pav_sc0000977.1_g090.1.mk	0.910482	0.878926	turquoise
				Pav_sc0005287.1_g030.1.mk	0.910471	0.810622	turquoise	Pav_sc0000740.1_g230.1.mk	0.802772	-0.526686	blue	Pav_sc0000740.1_g230.1.mk	0.802772	-0.644662	blue					Pav_sc0005287.1_g030.1.mk	0.910471	0.755598	turquoise
				Pav_sc0000852.1_g610.1.mk	0.910468	0.68999	turquoise	Pav_sc0001239.1_g110.1.mk	0.80274	-0.515246	blue	Pav_sc0001239.1_g110.1.mk	0.80274	-0.643153	blue					Pav_sc0000852.1_g610.1.mk	0.910468	0.637281	turquoise
				Pav_sc0000588.1_g160.1.mk	0.910455	0.958831	turquoise	Pav_sc0001478.1_g190.1.mk	0.802424	-0.529756	blue	Pav_sc0001478.1_g190.1.mk	0.802424	-0.623821	blue					Pav_sc0000588.1_g160.1.mk	0.910455	0.893177	turquoise
				Pav_sc0000274.1_g070.1.mk	0.91017	0.710571	turquoise	Pav_sc0001831.1_g160.1.mk	0.802225	-0.45939	blue	Pav_sc0001831.1_g160.1.mk	0.802225	-0.588776	blue					Pav_sc0000274.1_g070.1.mk	0.91017	0.613861	turquoise
				Pav_sc0000848.1_g200.1.mk	0.91016	0.692904	turquoise	Pav_co4024757.1_g010.1.mk	0.802129	-0.539088	blue	Pav_co4024757.1_g010.1.mk	0.802129	-0.674543	blue					Pav_sc0000848.1_g200.1.mk	0.91016	0.617341	turquoise
				Pav_sc0000586.1_g020.1.mk	0.909928	0.806647	turquoise	Pav_sc0006365.1_g060.1.mk	0.802081	-0.709779	blue	Pav_sc0006365.1_g060.1.mk	0.802081	-0.778016	blue					Pav_sc0000586.1_g020.1.mk	0.909928	0.789095	turquoise
				Pav_sc0000383.1_g1080.1.mk	0.909918	0.906078	turquoise	Pav_sc0000196.1_g070.1.mk	0.80203	-0.82088	blue	Pav_sc0000196.1_g070.1.mk	0.80203	-0.852362	blue					Pav_sc0000383.1_g1080.1.mk	0.909918	0.932949	turquoise
				Pav_co4007377.1_g010.1.br	0.90975	0.915163	turquoise	Pav_sc0001031.1_g300.1.br	0.801813	-0.564311	blue	Pav_sc0001031.1_g300.1.br	0.801813	-0.664347	blue					Pav_co4007377.1_g010.1.br	0.90975	0.887645	turquoise
				Pav_sc0000716.1_g010.1.mk	0.909729	0.932777	turquoise	Pav_sc0000775.1_g310.1.mk	-0.801603	0.766953	blue	Pav_sc0000775.1_g310.1.mk	-0.801603	0.804643	blue					Pav_sc0000716.1_g010.1.mk	0.909729	0.920764	turquoise
				Pav_sc0000138.1_g870.1.mk	0.909667	0.725069	turquoise	Pav_sc0000002.1_g350.1.mk	0.801553	-0.525163	blue	Pav_sc0000002.1_g350.1.mk	0.801553	-0.652199	blue					Pav_sc0000138.1_g870.1.mk	0.909667	0.69157	turquoise
				Pav_sc0001623.1_g310.1.mk	0.909572	0.886991	turquoise	novel.897	0.801425	-0.47217	blue	novel.897	0.801425	-0.601346	blue					Pav_sc0001623.1_g310.1.mk	0.909572	0.797739	turquoise
				Pav_sc0000069.1_g130.1.mk	0.909548	0.901311	turquoise	Pav_sc0000028.1_g770.1.mk	-0.801261	0.723431	blue	Pav_sc0000028.1_g770.1.mk	-0.801261	0.783693	blue					Pav_sc0000069.1_g130.1.mk	0.909548	0.796576	turquoise
				Pav_sc0001710.1_g060.1.mk	0.909525	0.901369	turquoise	Pav_sc0000254.1_g1450.1.mk	-0.801155	0.745767	blue	Pav_sc0000254.1_g1450.1.mk	-0.801155	0.8031	blue					Pav_sc0001710.1_g060.1.mk	0.909525	0.840098	turquoise
				Pav_sc0000661.1_g130.1.mk	0.909464	0.86537	turquoise	Pav_sc0000370.1_g170.1.mk	0.800963	-0.768754	blue	Pav_sc0000370.1_g170.1.mk	0.800963	-0.813215	blue					Pav_sc0000661.1_g130.1.mk	0.909464	0.809401	turquoise
				Pav_sc0000200.1_g080.1.br	0.90938	0.793832	turquoise	Pav_sc0001309.1_g1060.1.mk	0.80082	-0.593767	blue	Pav_sc0001309.1_g1060.1.mk	0.80082	-0.67408	blue					Pav_sc0000200.1_g080.1.br	0.90938	0.756146	turquoise
				Pav_sc0001111.1_g330.1.mk	0.909136	0.881361	turquoise	Pav_sc0001305.1_g060.1.mk	0.800761	-0.465928	blue	Pav_sc0001305.1_g060.1.mk	0.800761	-0.609159	blue					Pav_sc0001111.1_g330.1.mk	0.909136	0.896511	turquoise
				Pav_sc0000251.1_g110.1.mk	0.909014	0.880493	turquoise	Pav_sc0000247.1_g090.1.mk	0.800547	-0.428918	blue	Pav_sc0000247.1_g090.1.mk	0.800547	-0.596435	blue					Pav_sc0000251.1_g110.1.mk	0.909014	0.758091	turquoise
				Pav_sc0003135.1_g290.1.mk	0.908933	0.840204	turquoise	Pav_sc0006464.1_g040.1.mk	0.799927	-0.45314	blue	Pav_sc0006464.1_g040.1.mk	0.799927	-0.586423	blue					Pav_sc0003135.1_g290.1.mk	0.908933	0.858644	turquoise
				Pav_sc0004475.1_g010.1.mk	0.908924	0.829904	turquoise	Pav_sc0000143.1_g300.1.mk	0.799741	-0.623789	blue	Pav_sc0000143.1_g300.1.mk	0.799741	-0.719842	blue					Pav_sc0004475.1_g010.1.mk	0.908924	0.793074	turquoise
				Pav_sc0001932.1_g100.1.mk	0.908795	0.680168	turquoise	Pav_sc0000767.1_g130.1.mk	0.799612	-0.699865	blue	Pav_sc0000767.1_g130.1.mk	0.799612	-0.748089	blue					Pav_sc0001932.1_g100.1.mk	0.908795	0.608118	turquoise
				Pav_sc0000983.1_g220.1.mk	0.908469	0.919549	turquoise	Pav_sc0003283.1_g020.1.mk	0.799445	-0.568402	blue	Pav_sc0003283.1_g020.1.mk	0.799445	-0.668613	blue					Pav_sc0000983.1_g220.1.mk	0.908469	0.947116	turquoise
				Pav_sc0001502.1_g480.1.mk	0.908224	0.889144	turquoise	Pav_sc0001911.1_g170.1.mk	0.798955	-0.599644	blue	Pav_sc0001911.1_g170.1.mk	0.798955	-0.735723	blue					Pav_sc0001502.1_g480.1.mk	0.908224	0.844717	turquoise
				Pav_sc0000087.1_g510.1.mk	0.908215	0.785604	turquoise	Pav_sc0000549.1_g380.1.br	-0.798901	0.486702	blue	Pav_sc0000549.1_g380.1.br	-0.798901	0.630844	blue					Pav_sc0000087.1_g510.1.mk	0.908215	0.678347	turquoise
				Pav_sc0000639.1_g200.1.mk	0.908136	0.685073	turquoise	Pav_sc0000491.1_g650.1.mk	0.797478	-0.849653	blue	Pav_sc0000491.1_g650.1.mk	0.797478	-0.846939	blue					Pav_sc0000639.1_g200.1.mk	0.908136	0.621782	turquoise
				Pav_sc0000130.1_g230.1.mk	0.908036	0.746421	turquoise	Pav_sc0004042.1_g020.1.mk	-0.797269	0.528509	blue	Pav_sc0004042.1_g020.1.mk	-0.797269	0.642447	blue					Pav_sc0000130.1_g230.1.mk	0.908036	0.655738	turquoise
				Pav_sc0001025.1_g160.1.mk	0.907781	0.931648	turquoise	Pav_sc0001181.1_g960.1.mk	0.797147	-0.422107	blue	Pav_sc0001181.1_g960.1.mk	0.797147	-0.579874	blue					Pav_sc0001025.1_g160.1.mk	0.907781	0.915326	turquoise
				Pav_sc0004467.1_g120.1.mk	0.907763	0.679974	turquoise	Pav_sc0000754.1_g260.1.mk	0.79696	-0.691605	blue	Pav_sc0000754.1_g260.1.mk	0.79696	-0.76045	blue					Pav_sc0004467.1_g120.1.mk	0.907763	0.616806	turquoise
				Pav_sc0000713.1_g430.1.mk	0.907553	0.6938	turquoise	Pav_sc0001958.1_g040.1.mk	0.796865	-0.788153	blue	Pav_sc0001958.1_g040.1.mk	0.796865	-0.806006	blue					Pav_sc0000713.1_g430.1.mk	0.907553	0.603899	turquoise
				Pav_sc0000551.1_g130.1.mk	0.907405	0.844426	turquoise	Pav_sc0002100.1_g110.1.mk	0.796834	-0.608496	blue	Pav_sc0002100.1_g110.1.mk	0.796834	-0.753645	blue					Pav_sc0000551.1_g130.1.mk	0.907405	0.801657	turquoise
				Pav_sc0000220.1_g1340.1.mk	0.907206	0.691583	turquoise	Pav_sc0000558.1_g860.1.mk	0.796519	-0.705932	blue	Pav_sc0000558.1_g860.1.mk	0.796519	-0.766317	blue					Pav_sc0000220.1_g1340.1.mk	0.907206	0.622202	turquoise
				Pav_sc0005366.1_g010.1.br	0.907166	0.769581	turquoise	Pav_co4020555.1_g010.1.br	0.795253	-0.714248	blue	Pav_co4020555.1_g010.1.br	0.795253	-0.769224	blue					Pav_sc0005366.1_g010.1.br	0.907166	0.747249	turquoise
				Pav_sc0000583.1_g1290.1.mk	0.907121	0.681578	turquoise	Pav_sc0000624.1_g1890.1.mk	0.794948	-0.336123	blue	Pav_sc0000624.1_g1890.1.mk	0.794948	-0.531157	blue					Pav_sc0000583.1_g1290.1.mk	0.907121	0.607738	turquoise
				Pav_sc0000487.1_g090.1.br	0.907111	0.833699	turquoise	Pav_sc0001405.1_g240.1.br	0.794481	-0.496509	blue	Pav_sc0001405.1_g240.1.br	0.794481	-0.640059	blue					Pav_sc0000487.1_g090.1.br	0.907111	0.782725	turquoise
				Pav_sc0000363.1_g180.1.mk	0.907088	0.733319	turquoise	Pav_sc0001015.1_g080.1.mk	-0.794421	0.40516	blue	Pav_sc0001015.1_g080.1.mk	-0.794421	0.575705	blue					Pav_sc0000363.1_g180.1.mk	0.907088	0.672214	turquoise
				Pav_sc0000704.1_g470.1.mk	0.907055	0.816064	turquoise	Pav_sc0000055.1_g630.1.mk	0.79393	-0.700315	blue	Pav_sc0000055.1_g630.1.mk	0.79393	-0.774896	blue					Pav_sc0000704.1_g470.1.mk	0.907055	0.723073	turquoise
				Pav_sc0000638.1_g720.1.mk	0.906694	0.706311	turquoise	Pav_sc0001275.1_g530.1.mk	0.793928	-0.641937	blue	Pav_sc0001275.1_g530.1.mk	0.793928	-0.688628	blue					Pav_sc0000638.1_g720.1.mk	0.906694	0.667713	turquoise
				Pav_sc0000357.1_g070.1.mk	0.906566	0.688519	turquoise	Pav_sc0004305.1_g090.1.mk	-0.793625	0.776473	blue	Pav_sc0004305.1_g090.1.mk	-0.793625	0.814597	blue					Pav_sc0000357.1_g070.1.mk	0.906566	0.604085	turquoise
				Pav_sc0000465.1_g550.1.mk	0.905901	0.761394	turquoise	Pav_sc0002475.1_g200.1.mk	-0.792839	0.682178	blue	Pav_sc0002475.1_g200.1.mk	-0.792839	0.733889	blue					Pav_sc0000465.1_g550.1.mk	0.905901	0.724085	turquoise
				Pav_sc0000064.1_g080.1.mk	0.905697	0.924335	turquoise	Pav_sc0000567.1_g1160.1.mk	0.791656	-0.659861	blue	Pav_sc0000567.1_g1160.1.mk	0.791656	-0.77256	blue					Pav_sc0000064.1_g080.1.mk	0.905697	0.820561	turquoise
				Pav_sc0000103.1_g260.1.mk	0.90546	0.704797	turquoise	Pav_sc0001601.1_g060.1.mk	0.791615	-0.781921	blue	Pav_sc0001601.1_g060.1.mk	0.791615	-0.817832	blue					Pav_sc0000103.1_g260.1.mk	0.90546	0.616433	turquoise
				Pav_sc0000843.1_g680.1.mk	0.905449	0.682896	turquoise	Pav_sc0000042.1_g280.1.mk	0.791346	-0.442196	blue	Pav_sc0000042.1_g280.1.mk	0.791346	-0.575221	blue					Pav_sc0000843.1_g680.1.mk	0.905449	0.609911	turquoise
				Pav_sc0001925.1_g070.1.mk	0.905118	0.784804	turquoise	Pav_sc0000030.1_g120.1.mk	0.791205	-0.848163	blue	Pav_sc0000030.1_g120.1.mk	0.791205	-0.845386	blue					Pav_sc0001925.1_g070.1.mk	0.905118	0.785799	turquoise
				Pav_sc0000652.1_g1100.1.mk	0.904959	0.869105	turquoise	Pav_sc0000399.1_g130.1.mk	0.790833	-0.36702	blue	Pav_sc0000399.1_g130.1.mk	0.790833	-0.54639	blue					Pav_sc0000652.1_g1100.1.mk	0.904959	0.875585	turquoise
				Pav_sc0000588.1_g070.1.mk	0.904859	0.904854	turquoise	Pav_sc0000465.1_g440.1.br	0.790685	-0.564612	blue	Pav_sc0000465.1_g440.1.br	0.790685	-0.703905	blue					Pav_sc0000588.1_g070.1.mk	0.904859	0.902158	turquoise
				Pav_sc0000293.1_g120.1.mk	0.90482	0.742908	turquoise	Pav_sc0002019.1_g030.1.mk	-0.790642	0.583231	blue	Pav_sc0002019.1_g030.1.mk	-0.790642	0.688305	blue					Pav_sc0000293.1_g120.1.mk	0.90482	0.728359	turquoise
				Pav_co4075491.1_g010.1.mk	0.90473	0.872821	turquoise	Pav_sc0002544.1_g040.1.mk	0.790468	-0.608239	blue	Pav_sc0002544.1_g040.1.mk	0.790468	-0.693643	blue					Pav_co4075491.1_g010.1.mk	0.90473	0.890882	turquoise
				Pav_sc0002207.1_g400.1.mk	0.904479	0.699432	turquoise	Pav_sc0006050.1_g050.1.mk	0.790277	-0.519667	blue	Pav_sc0006050.1_g050.1.mk	0.790277	-0.66081	blue					Pav_sc0002207.1_g400.1.mk	0.904479	0.613156	turquoise
				Pav_sc0000689.1_g300.1.mk	0.904402	0.900872	turquoise	Pav_sc0001478.1_g650.1.mk	0.790205	-0.751823	blue	Pav_sc0001478.1_g650.1.mk	0.790205	-0.794333	blue					Pav_sc0000689.1_g300.1.mk	0.904402	0.813868	turquoise
				Pav_sc0000848.1_g210.1.mk	0.904375	0.822261	turquoise	Pav_sc0002342.1_g060.1.br	0.790179	-0.68569	blue	Pav_sc0002342.1_g060.1.br	0.790179	-0.733186	blue					Pav_sc0000848.1_g210.1.mk	0.904375	0.697355	turquoise
				Pav_sc0000981.1_g400.1.mk	0.904222	0.693699	turquoise	Pav_sc0000323.1_g260.1.mk	-0.789801	0.687523	blue	Pav_sc0000323.1_g260.1.mk	-0.789801	0.749125	blue					Pav_sc0000981.1_g400.1.mk	0.904222	0.639305	turquoise
				Pav_sc0000848.1_g070.1.mk	0.904212	0.883499	turquoise	Pav_sc0000084.1_g430.1.mk	-0.789572	0.478993	blue	Pav_sc0000084.1_g430.1.mk	-0.789572	0.60714	blue					Pav_sc0000848.1_g070.1.mk	0.904212	0.869183	turquoise
				Pav_sc0002360.1_g1000.1.br	0.903911	0.691578	turquoise	Pav_sc0006050.1_g040.1.mk	0.789549	-0.513667	blue	Pav_sc0006050.1_g040.1.mk	0.789549	-0.651611	blue					Pav_sc0002360.1_g1000.1.br	0.903911	0.617156	turquoise
				Pav_sc0000851.1_g060.1.mk	0.903909	0.911278	turquoise	Pav_sc0000886.1_g210.1.mk	0.789496	-0.48293	blue	Pav_sc0000886.1_g210.1.mk	0.789496	-0.622456	blue					Pav_sc0000851.1_g060.1.mk	0.903909	0.895658	turquoise
				Pav_sc0001461.1_g420.1.mk	0.903856	0.765065	turquoise	Pav_sc0000595.1_g110.1.br	0.789371	-0.579706	blue	Pav_sc0000595.1_g110.1.br	0.789371	-0.677617	blue					Pav_sc0001461.1_g420.1.mk	0.903856	0.679989	turquoise
				Pav_sc0000355.1_g050.1.mk	0.903652	0.697273	turquoise	Pav_sc0002233.1_g110.1.mk	-0.789318	0.599376	blue	Pav_sc0002233.1_g110.1.mk	-0.789318	0.681478	blue					Pav_sc0000355.1_g050.1.mk	0.903652	0.59887	turquoise
				Pav_sc0001345.1_g280.1.mk	0.903611	0.800293	turquoise	Pav_sc0000638.1_g240.1.mk	0.78885	-0.800922	blue	Pav_sc0000638.1_g240.1.mk	0.78885	-0.840874	blue					Pav_sc0001345.1_g280.1.mk	0.903611	0.698495	turquoise
				Pav_sc0000375.1_g500.1.mk	0.903493	0.77984	turquoise	Pav_co4061311.1_g010.1.br	0.788704	-0.480388	blue	Pav_co4061311.1_g010.1.br	0.788704	-0.584291	blue					Pav_sc0000375.1_g500.1.mk	0.903493	0.651451	turquoise
				Pav_sc0005529.1_g010.1.br	0.903319	0.928358	turquoise	Pav_sc0000254.1_g1570.1.mk	0.788496	-0.494997	blue	Pav_sc0000254.1_g1570.1.mk	0.788496	-0.609504	blue					Pav_sc0005529.1_g010.1.br	0.903319	0.911573	turquoise
				Pav_sc0001196.1_g980.1.mk	0.903172	0.969379	turquoise	Pav_sc0001280.1_g150.1.mk	0.78825	-0.44148	blue	Pav_sc0001280.1_g150.1.mk	0.78825	-0.576757	blue					Pav_sc0001196.1_g980.1.mk	0.903172	0.879725	turquoise
				Pav_sc0000979.1_g120.1.mk	0.90241	0.724164	turquoise	Pav_sc0000557.1_g170.1.mk	-0.787715	0.622156	blue	Pav_sc0000557.1_g170.1.mk	-0.787715	0.717492	blue					Pav_sc0000979.1_g120.1.mk	0.90241	0.659284	turquoise
				Pav_sc0011027.1_g010.1.br	0.902329	0.748823	turquoise	Pav_sc0000091.1_g460.1.mk	-0.787604	0.765238	blue	Pav_sc0000091.1_g460.1.mk	-0.787604	0.809481	blue					Pav_sc0011027.1_g010.1.br	0.902329	0.754014	turquoise
				Pav_sc0001263.1_g080.1.mk	0.902206	0.91808	turquoise	novel.154	0.787436	-0.604997	blue	novel.154	0.787436	-0.736238	blue					Pav_sc0001263.1_g080.1.mk	0.902206	0.900075	turquoise
				Pav_sc0000395.1_g170.1.mk	0.902185	0.824531	turquoise	Pav_sc0000740.1_g250.1.mk	0.785915	-0.74851	blue	Pav_sc0000740.1_g250.1.mk	0.785915	-0.803886	blue					Pav_sc0000395.1_g170.1.mk	0.902185	0.814045	turquoise
				Pav_sc0000852.1_g940.1.mk	0.90214	0.975576	turquoise	Pav_sc0000624.1_g130.1.mk	0.785492	-0.657109	blue	Pav_sc0000624.1_g130.1.mk	0.785492	-0.69625	blue					Pav_sc0000852.1_g940.1.mk	0.90214	0.944523	turquoise
				Pav_sc0000103.1_g1860.1.mk	0.902101	0.671323	turquoise	Pav_sc0001406.1_g040.1.mk	0.785291	-0.741271	blue	Pav_sc0001406.1_g040.1.mk	0.785291	-0.783256	blue					Pav_sc0000103.1_g1860.1.mk	0.902101	0.597727	turquoise
				Pav_co4047541.1_g010.1.mk	0.90208	0.775646	turquoise	Pav_sc0000100.1_g260.1.br	0.784675	-0.62083	blue	Pav_sc0000100.1_g260.1.br	0.784675	-0.667506	blue					Pav_co4047541.1_g010.1.mk	0.90208	0.768402	turquoise
				Pav_sc0001084.1_g160.1.mk	0.901891	0.772746	turquoise	Pav_sc0000648.1_g180.1.mk	-0.784232	0.662203	blue	Pav_sc0000648.1_g180.1.mk	-0.784232	0.698119	blue					Pav_sc0001084.1_g160.1.mk	0.901891	0.776565	turquoise
				Pav_sc0000558.1_g820.1.mk	0.901681	0.861102	turquoise	Pav_sc0000582.1_g110.1.br	0.784124	-0.394768	blue	Pav_sc0000582.1_g110.1.br	0.784124	-0.587391	blue					Pav_sc0000558.1_g820.1.mk	0.901681	0.868294	turquoise
				Pav_sc0001341.1_g490.1.mk	0.901592	0.749762	turquoise	Pav_sc0000582.1_g390.1.mk	0.78399	-0.760376	blue	Pav_sc0000582.1_g390.1.mk	0.78399	-0.770694	blue					Pav_sc0001341.1_g490.1.mk	0.901592	0.707288	turquoise
				Pav_sc0001529.1_g190.1.mk	0.901572	0.903709	turquoise	Pav_sc0000780.1_g330.1.mk	0.783748	-0.740655	blue	Pav_sc0000780.1_g330.1.mk	0.783748	-0.785125	blue					Pav_sc0001529.1_g190.1.mk	0.901572	0.87479	turquoise
				Pav_sc0006132.1_g030.1.mk	0.901546	0.847313	turquoise	Pav_sc0003492.1_g160.1.mk	0.7824	-0.594229	blue	Pav_sc0003492.1_g160.1.mk	0.7824	-0.680441	blue					Pav_sc0006132.1_g030.1.mk	0.901546	0.743052	turquoise
				Pav_co4037907.1_g010.1.mk	0.901544	0.689425	turquoise	Pav_sc0000072.1_g320.1.mk	0.781578	-0.597295	blue	Pav_sc0000072.1_g320.1.mk	0.781578	-0.728515	blue					Pav_co4037907.1_g010.1.mk	0.901544	0.648142	turquoise
				Pav_sc0001587.1_g140.1.mk	0.900888	0.85859	turquoise	Pav_sc0000026.1_g520.1.mk	0.781147	-0.45225	blue	Pav_sc0000026.1_g520.1.mk	0.781147	-0.584868	blue					Pav_sc0001587.1_g140.1.mk	0.900888	0.816609	turquoise
				Pav_sc0000554.1_g020.1.br	0.900864	0.79558	turquoise	Pav_sc0000358.1_g580.1.mk	0.780944	-0.86908	blue	Pav_sc0000358.1_g580.1.mk	0.780944	-0.883098	blue					Pav_sc0000554.1_g020.1.br	0.900864	0.75158	turquoise
				Pav_sc0001323.1_g410.1.mk	0.900573	0.828697	turquoise	Pav_sc0003562.1_g100.1.mk	0.780926	-0.514798	blue	Pav_sc0003562.1_g100.1.mk	0.780926	-0.617663	blue					Pav_sc0001323.1_g410.1.mk	0.900573	0.771591	turquoise
				Pav_sc0002327.1_g800.1.mk	-0.900482	-0.834849	turquoise	Pav_sc0000493.1_g090.1.mk	0.780907	-0.418622	blue	Pav_sc0000493.1_g090.1.mk	0.780907	-0.531407	blue					Pav_sc0002327.1_g800.1.mk	-0.900482	-0.71974	turquoise
				Pav_sc0001440.1_g100.1.mk	0.900306	0.704893	turquoise	novel.518	0.78069	-0.627729	blue	novel.518	0.78069	-0.678574	blue					Pav_sc0001440.1_g100.1.mk	0.900306	0.609022	turquoise
				novel.1111	0.899899	0.675155	turquoise	Pav_sc0001364.1_g140.1.mk	0.780344	-0.551472	blue	Pav_sc0001364.1_g140.1.mk	0.780344	-0.644152	blue					novel.1111	0.899899	0.622888	turquoise
				Pav_sc0001938.1_g280.1.mk	0.899373	0.687706	turquoise	Pav_sc0000207.1_g1170.1.mk	-0.779738	0.823575	blue	Pav_sc0000207.1_g1170.1.mk	-0.779738	0.829873	blue					Pav_sc0001938.1_g280.1.mk	0.899373	0.633687	turquoise
				Pav_sc0010552.1_g010.1.mk	0.899242	0.675611	turquoise	Pav_sc0004204.1_g020.1.mk	0.778992	-0.506001	blue	Pav_sc0004204.1_g020.1.mk	0.778992	-0.598724	blue					Pav_sc0010552.1_g010.1.mk	0.899242	0.606978	turquoise
				Pav_sc0000027.1_g120.1.mk	0.899156	0.696752	turquoise	Pav_sc0000598.1_g020.1.br	0.778964	-0.429262	blue	Pav_sc0000598.1_g020.1.br	0.778964	-0.576857	blue					Pav_sc0000027.1_g120.1.mk	0.899156	0.590883	turquoise
				Pav_sc0000229.1_g400.1.mk	0.899152	0.678315	turquoise	Pav_sc0000370.1_g900.1.mk	0.778283	-0.537939	blue	Pav_sc0000370.1_g900.1.mk	0.778283	-0.645429	blue					Pav_sc0000229.1_g400.1.mk	0.899152	0.62653	turquoise
				Pav_sc0002479.1_g380.1.br	0.898867	0.671431	turquoise	Pav_sc0000789.1_g480.1.br	0.778247	-0.454121	blue	Pav_sc0000789.1_g480.1.br	0.778247	-0.573114	blue					Pav_sc0002479.1_g380.1.br	0.898867	0.598797	turquoise
				novel.494	0.898488	0.705283	turquoise	Pav_sc0000044.1_g920.1.mk	0.777387	-0.451873	blue	Pav_sc0000044.1_g920.1.mk	0.777387	-0.60689	blue					novel.494	0.898488	0.654322	turquoise
				Pav_sc0000478.1_g260.1.mk	0.898398	0.780393	turquoise	Pav_sc0000201.1_g140.1.br	0.777335	-0.494265	blue	Pav_sc0000201.1_g140.1.br	0.777335	-0.594475	blue					Pav_sc0000478.1_g260.1.mk	0.898398	0.727569	turquoise
				Pav_sc0000057.1_g010.1.mk	0.898301	0.690911	turquoise	Pav_sc0000157.1_g770.1.mk	0.777199	-0.509388	blue	Pav_sc0000157.1_g770.1.mk	0.777199	-0.61585	blue					Pav_sc0000057.1_g010.1.mk	0.898301	0.609923	turquoise
				Pav_sc0000754.1_g420.1.mk	0.89814	0.928509	turquoise	Pav_sc0002181.1_g190.1.mk	0.777012	-0.628345	blue	Pav_sc0002181.1_g190.1.mk	0.777012	-0.718688	blue					Pav_sc0000754.1_g420.1.mk	0.89814	0.850034	turquoise
				Pav_sc0000449.1_g150.1.mk	0.897938	0.834266	turquoise	Pav_sc0000598.1_g260.1.mk	0.776951	-0.500464	blue	Pav_sc0000598.1_g260.1.mk	0.776951	-0.632192	blue					Pav_sc0000449.1_g150.1.mk	0.897938	0.837549	turquoise
				novel.346	0.897776	0.942873	turquoise	Pav_sc0000848.1_g270.1.mk	-0.776756	0.544209	blue	Pav_sc0000848.1_g270.1.mk	-0.776756	0.644804	blue					novel.346	0.897776	0.927136	turquoise
				Pav_sc0000138.1_g830.1.br	0.897641	0.697248	turquoise	Pav_sc0000648.1_g320.1.mk	0.77657	-0.609416	blue	Pav_sc0000648.1_g320.1.mk	0.77657	-0.662332	blue					Pav_sc0000138.1_g830.1.br	0.897641	0.623693	turquoise
				Pav_sc0001090.1_g170.1.mk	0.897636	0.835985	turquoise	Pav_sc0000977.1_g510.1.mk	0.776532	-0.706463	blue	Pav_sc0000977.1_g510.1.mk	0.776532	-0.733927	blue					Pav_sc0001090.1_g170.1.mk	0.897636	0.789414	turquoise
				Pav_sc0001240.1_g090.1.mk	0.897369	0.686367	turquoise	Pav_sc0000257.1_g1070.1.mk	0.776052	-0.422631	blue	Pav_sc0000257.1_g1070.1.mk	0.776052	-0.563832	blue					Pav_sc0001240.1_g090.1.mk	0.897369	0.614037	turquoise
				Pav_sc0001392.1_g100.1.mk	0.897133	0.851125	turquoise	Pav_sc0000370.1_g250.1.mk	0.776046	-0.586074	blue	Pav_sc0000370.1_g250.1.mk	0.776046	-0.727915	blue					Pav_sc0001392.1_g100.1.mk	0.897133	0.763865	turquoise
				Pav_sc0000800.1_g1140.1.mk	0.896877	0.828634	turquoise	Pav_sc0000129.1_g1160.1.br	0.775193	-0.558713	blue	Pav_sc0000129.1_g1160.1.br	0.775193	-0.615517	blue					Pav_sc0000800.1_g1140.1.mk	0.896877	0.860696	turquoise
				Pav_sc0001405.1_g1080.1.mk	0.896751	0.74614	turquoise	Pav_sc0000095.1_g1440.1.mk	0.774435	-0.635724	blue	Pav_sc0000095.1_g1440.1.mk	0.774435	-0.703008	blue					Pav_sc0001405.1_g1080.1.mk	0.896751	0.753939	turquoise
				Pav_sc0000449.1_g040.1.mk	0.896625	0.794052	turquoise	Pav_sc0000029.1_g190.1.mk	-0.774318	0.597196	blue	Pav_sc0000029.1_g190.1.mk	-0.774318	0.684329	blue					Pav_sc0000449.1_g040.1.mk	0.896625	0.809431	turquoise
				novel.762	0.896625	0.659229	turquoise	Pav_sc0001077.1_g430.1.mk	0.774149	-0.655357	blue	Pav_sc0001077.1_g430.1.mk	0.774149	-0.720775	blue					novel.762	0.896625	0.585294	turquoise
				Pav_sc0001181.1_g640.1.mk	0.896505	0.66318	turquoise	Pav_sc0002154.1_g030.1.mk	0.773726	-0.645738	blue	Pav_sc0002154.1_g030.1.mk	0.773726	-0.712925	blue					Pav_sc0001181.1_g640.1.mk	0.896505	0.58976	turquoise
				Pav_sc0001797.1_g120.1.mk	0.896278	0.912943	turquoise	Pav_sc0001289.1_g270.1.mk	0.773307	-0.654033	blue	Pav_sc0001289.1_g270.1.mk	0.773307	-0.712888	blue					Pav_sc0001797.1_g120.1.mk	0.896278	0.899603	turquoise
				Pav_sc0003773.1_g010.1.br	0.896265	0.785602	turquoise	Pav_sc0001309.1_g430.1.mk	0.772996	-0.77203	blue	Pav_sc0001309.1_g430.1.mk	0.772996	-0.800346	blue					Pav_sc0003773.1_g010.1.br	0.896265	0.688459	turquoise
				Pav_sc0000823.1_g230.1.mk	0.896186	0.864515	turquoise	Pav_sc0000358.1_g040.1.mk	-0.772867	0.798696	blue	Pav_sc0000358.1_g040.1.mk	-0.772867	0.78817	blue					Pav_sc0000823.1_g230.1.mk	0.896186	0.848601	turquoise
				Pav_sc0002157.1_g030.1.mk	0.896154	0.774058	turquoise	Pav_sc0001196.1_g890.1.mk	0.772714	-0.441472	blue	Pav_sc0001196.1_g890.1.mk	0.772714	-0.593741	blue					Pav_sc0002157.1_g030.1.mk	0.896154	0.752877	turquoise
				Pav_sc0000040.1_g080.1.br	0.895794	0.784563	turquoise	Pav_sc0000084.1_g570.1.mk	0.772706	-0.731972	blue	Pav_sc0000084.1_g570.1.mk	0.772706	-0.769264	blue					Pav_sc0000040.1_g080.1.br	0.895794	0.791763	turquoise
				Pav_sc0000877.1_g1370.1.mk	0.895653	0.910734	turquoise	Pav_sc0000675.1_g260.1.mk	0.770579	-0.698796	blue	Pav_sc0000675.1_g260.1.mk	0.770579	-0.717747	blue					Pav_sc0000877.1_g1370.1.mk	0.895653	0.855441	turquoise
				Pav_sc0001102.1_g540.1.mk	0.895305	0.878628	turquoise	novel.628	0.770505	-0.680372	blue	novel.628	0.770505	-0.743247	blue					Pav_sc0001102.1_g540.1.mk	0.895305	0.904882	turquoise
				Pav_sc0001540.1_g330.1.mk	0.895189	0.847984	turquoise	Pav_sc0000396.1_g1190.1.mk	0.770418	-0.699392	blue	Pav_sc0000396.1_g1190.1.mk	0.770418	-0.775587	blue					Pav_sc0001540.1_g330.1.mk	0.895189	0.822191	turquoise
				Pav_sc0000311.1_g880.1.br	0.894955	0.735464	turquoise	Pav_sc0001090.1_g250.1.mk	0.770404	-0.777952	blue	Pav_sc0001090.1_g250.1.mk	0.770404	-0.757089	blue					Pav_sc0000311.1_g880.1.br	0.894955	0.622448	turquoise
				Pav_sc0000667.1_g500.1.mk	0.894787	0.870922	turquoise	Pav_sc0000078.1_g180.1.mk	0.769875	-0.616107	blue	Pav_sc0000078.1_g180.1.mk	0.769875	-0.700696	blue					Pav_sc0000667.1_g500.1.mk	0.894787	0.818801	turquoise
				Pav_sc0001129.1_g120.1.mk	0.894393	0.85706	turquoise	Pav_sc0002792.1_g290.1.mk	0.769243	-0.703614	blue	Pav_sc0002792.1_g290.1.mk	0.769243	-0.738443	blue					Pav_sc0001129.1_g120.1.mk	0.894393	0.763072	turquoise
				Pav_sc0000747.1_g580.1.mk	0.894321	0.793727	turquoise	Pav_sc0000409.1_g200.1.br	-0.768932	0.638414	blue	Pav_sc0000409.1_g200.1.br	-0.768932	0.710068	blue					Pav_sc0000747.1_g580.1.mk	0.894321	0.661718	turquoise
				Pav_sc0002181.1_g330.1.mk	0.894175	0.667149	turquoise	Pav_sc0000557.1_g130.1.mk	0.768926	-0.879471	blue	Pav_sc0000557.1_g130.1.mk	0.768926	-0.880458	blue					Pav_sc0002181.1_g330.1.mk	0.894175	0.567773	turquoise
				Pav_sc0003492.1_g400.1.mk	0.894118	0.865693	turquoise	Pav_sc0000409.1_g160.1.mk	0.767716	-0.723184	blue	Pav_sc0000409.1_g160.1.mk	0.767716	-0.764545	blue					Pav_sc0003492.1_g400.1.mk	0.894118	0.809465	turquoise
				Pav_sc0000877.1_g1490.1.mk	0.893742	0.939926	turquoise	Pav_sc0001181.1_g900.1.br	0.766982	-0.660052	blue	Pav_sc0001181.1_g900.1.br	0.766982	-0.715722	blue					Pav_sc0000877.1_g1490.1.mk	0.893742	0.859269	turquoise
				Pav_sc0000591.1_g190.1.mk	0.893246	0.946531	turquoise	Pav_sc0001846.1_g050.1.mk	0.766653	-0.741353	blue	Pav_sc0001846.1_g050.1.mk	0.766653	-0.746688	blue					Pav_sc0000591.1_g190.1.mk	0.893246	0.931068	turquoise
				Pav_sc0000363.1_g300.1.mk	0.893095	0.804214	turquoise	Pav_sc0003905.1_g040.1.mk	0.766579	-0.775421	blue	Pav_sc0003905.1_g040.1.mk	0.766579	-0.824684	blue					Pav_sc0000363.1_g300.1.mk	0.893095	0.819221	turquoise
				Pav_sc0000869.1_g580.1.br	0.892655	0.934424	turquoise	Pav_sc0001405.1_g1760.1.mk	0.765281	-0.643078	blue	Pav_sc0001405.1_g1760.1.mk	0.765281	-0.757188	blue					Pav_sc0000869.1_g580.1.br	0.892655	0.829918	turquoise
				Pav_sc0000554.1_g520.1.mk	0.892638	0.757913	turquoise	Pav_sc0000370.1_g290.1.mk	0.765002	-0.514145	blue	Pav_sc0000370.1_g290.1.mk	0.765002	-0.621736	blue					Pav_sc0000554.1_g520.1.mk	0.892638	0.679228	turquoise
				Pav_sc0000852.1_g600.1.mk	0.89249	0.905576	turquoise	Pav_sc0000009.1_g1050.1.mk	0.764295	-0.682122	blue	Pav_sc0000009.1_g1050.1.mk	0.764295	-0.749502	blue					Pav_sc0000852.1_g600.1.mk	0.89249	0.88918	turquoise
				Pav_sc0000484.1_g550.1.mk	0.892391	0.752097	turquoise	Pav_sc0001583.1_g330.1.mk	0.763176	-0.5415	blue	Pav_sc0001583.1_g330.1.mk	0.763176	-0.605174	blue					Pav_sc0000484.1_g550.1.mk	0.892391	0.713595	turquoise
				Pav_sc0000624.1_g050.1.mk	0.892309	0.861676	turquoise	novel.698	0.762999	-0.755851	blue	novel.698	0.762999	-0.763249	blue					Pav_sc0000624.1_g050.1.mk	0.892309	0.864258	turquoise
				novel.580	0.892251	0.679273	turquoise	Pav_sc0001545.1_g130.1.mk	0.762761	-0.424545	blue	Pav_sc0001545.1_g130.1.mk	0.762761	-0.564592	blue					novel.580	0.892251	0.611947	turquoise
				Pav_sc0000009.1_g020.1.mk	0.892156	0.942757	turquoise	Pav_sc0000065.1_g840.1.mk	0.762744	-0.824091	blue	Pav_sc0000065.1_g840.1.mk	0.762744	-0.85599	blue					Pav_sc0000009.1_g020.1.mk	0.892156	0.852271	turquoise
				Pav_sc0012525.1_g010.1.mk	0.892086	0.757336	turquoise	novel.692	-0.761753	0.567436	blue	novel.692	-0.761753	0.646377	blue					Pav_sc0012525.1_g010.1.mk	0.892086	0.733755	turquoise
				Pav_sc0003614.1_g080.1.mk	0.891891	0.827669	turquoise	Pav_sc0000497.1_g120.1.mk	0.761574	-0.423051	blue	Pav_sc0000497.1_g120.1.mk	0.761574	-0.577392	blue					Pav_sc0003614.1_g080.1.mk	0.891891	0.780407	turquoise
				Pav_sc0000996.1_g100.1.mk	0.891866	0.907481	turquoise	Pav_sc0001963.1_g360.1.mk	0.760561	-0.364543	blue	Pav_sc0001963.1_g360.1.mk	0.760561	-0.520446	blue					Pav_sc0000996.1_g100.1.mk	0.891866	0.918977	turquoise
				Pav_sc0005678.1_g020.1.mk	0.891772	0.827025	turquoise	Pav_sc0000195.1_g360.1.mk	0.760313	-0.62441	blue	Pav_sc0000195.1_g360.1.mk	0.760313	-0.676919	blue					Pav_sc0005678.1_g020.1.mk	0.891772	0.73454	turquoise
				novel.775	0.891231	0.748763	turquoise	Pav_sc0002342.1_g010.1.mk	0.759929	-0.70617	blue	Pav_sc0002342.1_g010.1.mk	0.759929	-0.776382	blue					novel.775	0.891231	0.646427	turquoise
				Pav_sc0000493.1_g060.1.mk	0.891022	0.697828	turquoise	Pav_co4087363.1_g010.1.mk	0.758264	-0.738143	blue	Pav_co4087363.1_g010.1.mk	0.758264	-0.760697	blue					Pav_sc0000493.1_g060.1.mk	0.891022	0.583428	turquoise
				Pav_sc0000183.1_g440.1.mk	0.890954	0.877767	turquoise	Pav_sc0003135.1_g470.1.mk	0.756819	-0.365724	blue	Pav_sc0003135.1_g470.1.mk	0.756819	-0.521525	blue					Pav_sc0000183.1_g440.1.mk	0.890954	0.900261	turquoise
				Pav_sc0000449.1_g480.1.mk	0.890601	0.671356	turquoise	novel.1227	0.755872	-0.610746	blue	novel.1227	0.755872	-0.735188	blue					Pav_sc0000449.1_g480.1.mk	0.890601	0.584717	turquoise
				Pav_sc0000254.1_g1130.1.mk	0.890312	0.693064	turquoise	Pav_sc0002504.1_g020.1.mk	0.755768	-0.71597	blue	Pav_sc0002504.1_g020.1.mk	0.755768	-0.758672	blue					Pav_sc0000254.1_g1130.1.mk	0.890312	0.625386	turquoise
				Pav_sc0000158.1_g110.1.mk	0.890293	0.703952	turquoise	Pav_sc0002233.1_g170.1.mk	0.75458	-0.735579	blue	Pav_sc0002233.1_g170.1.mk	0.75458	-0.769438	blue					Pav_sc0000158.1_g110.1.mk	0.890293	0.627107	turquoise
				Pav_sc0000428.1_g360.1.mk	0.890291	0.83781	turquoise	Pav_sc0000085.1_g290.1.mk	0.754243	-0.584392	blue	Pav_sc0000085.1_g290.1.mk	0.754243	-0.690373	blue					Pav_sc0000428.1_g360.1.mk	0.890291	0.851741	turquoise
				novel.893	0.890148	0.689629	turquoise	Pav_sc0001031.1_g320.1.br	0.754	-0.445901	blue	Pav_sc0001031.1_g320.1.br	0.754	-0.568504	blue					novel.893	0.890148	0.621147	turquoise
				Pav_sc0000229.1_g490.1.mk	0.890107	0.653102	turquoise	Pav_sc0000395.1_g200.1.mk	0.753569	-0.371192	blue	Pav_sc0000395.1_g200.1.mk	0.753569	-0.535816	blue					Pav_sc0000229.1_g490.1.mk	0.890107	0.586013	turquoise
				Pav_sc0001963.1_g290.1.mk	0.890053	0.871693	turquoise	Pav_sc0001405.1_g1300.1.mk	0.753475	-0.478906	blue	Pav_sc0001405.1_g1300.1.mk	0.753475	-0.598415	blue					Pav_sc0001963.1_g290.1.mk	0.890053	0.897782	turquoise
				Pav_sc0002451.1_g130.1.mk	0.890034	0.846658	turquoise	Pav_sc0001111.1_g280.1.mk	-0.753277	0.528287	blue	Pav_sc0001111.1_g280.1.mk	-0.753277	0.661194	blue					Pav_sc0002451.1_g130.1.mk	0.890034	0.784205	turquoise
				Pav_sc0000243.1_g340.1.mk	0.889864	0.985931	turquoise	Pav_sc0008763.1_g010.1.br	-0.752768	0.517681	blue	Pav_sc0008763.1_g010.1.br	-0.752768	0.634034	blue					Pav_sc0000243.1_g340.1.mk	0.889864	0.922279	turquoise
				Pav_sc0000761.1_g170.1.mk	0.889806	0.683367	turquoise	Pav_sc0002934.1_g030.1.mk	0.751456	-0.435809	blue	Pav_sc0002934.1_g030.1.mk	0.751456	-0.575086	blue					Pav_sc0000761.1_g170.1.mk	0.889806	0.620951	turquoise
				Pav_sc0002197.1_g120.1.mk	0.889797	0.662148	turquoise	Pav_sc0001305.1_g190.1.br	-0.750991	0.643666	blue	Pav_sc0001305.1_g190.1.br	-0.750991	0.729808	blue					Pav_sc0002197.1_g120.1.mk	0.889797	0.605319	turquoise
				Pav_sc0000103.1_g190.1.mk	0.889772	0.933197	turquoise	Pav_sc0000174.1_g1620.1.br	0.750925	-0.549875	blue	Pav_sc0000174.1_g1620.1.br	0.750925	-0.666988	blue					Pav_sc0000103.1_g190.1.mk	0.889772	0.901604	turquoise
				Pav_co4013265.1_g020.1.mk	0.88973	0.833785	turquoise	Pav_sc0000103.1_g640.1.mk	0.750603	-0.459976	blue	Pav_sc0000103.1_g640.1.mk	0.750603	-0.597332	blue					Pav_co4013265.1_g020.1.mk	0.88973	0.758208	turquoise
				Pav_sc0001794.1_g010.1.mk	0.889661	0.678056	turquoise	Pav_sc0000474.1_g180.1.mk	-0.750188	0.708054	blue	Pav_sc0000474.1_g180.1.mk	-0.750188	0.753748	blue					Pav_sc0001794.1_g010.1.mk	0.889661	0.611043	turquoise
				Pav_sc0000220.1_g1040.1.mk	0.889567	0.663943	turquoise	Pav_sc0000557.1_g190.1.mk	0.749833	-0.823456	blue	Pav_sc0000557.1_g190.1.mk	0.749833	-0.8342	blue					Pav_sc0000220.1_g1040.1.mk	0.889567	0.610746	turquoise
				Pav_sc0002835.1_g140.1.mk	0.889316	0.659189	turquoise	Pav_sc0000467.1_g500.1.mk	0.748356	-0.66813	blue	Pav_sc0000467.1_g500.1.mk	0.748356	-0.743679	blue					Pav_sc0002835.1_g140.1.mk	0.889316	0.584563	turquoise
				Pav_sc0000260.1_g610.1.mk	-0.889112	-0.86981	turquoise	Pav_sc0000617.1_g170.1.mk	0.747651	-0.47208	blue	Pav_sc0000617.1_g170.1.mk	0.747651	-0.570984	blue					Pav_sc0000260.1_g610.1.mk	-0.889112	-0.772818	turquoise
				Pav_sc0000379.1_g090.1.mk	0.888904	0.926271	turquoise	Pav_sc0001883.1_g180.1.mk	-0.747061	0.69133	blue	Pav_sc0001883.1_g180.1.mk	-0.747061	0.749706	blue					Pav_sc0000379.1_g090.1.mk	0.888904	0.883321	turquoise
				Pav_sc0000214.1_g010.1.mk	0.888792	0.915386	turquoise	Pav_sc0000206.1_g420.1.mk	0.746556	-0.37008	blue	Pav_sc0000206.1_g420.1.mk	0.746556	-0.521166	blue					Pav_sc0000214.1_g010.1.mk	0.888792	0.925714	turquoise
				novel.1139	0.888733	0.778284	turquoise	Pav_sc0000130.1_g870.1.mk	0.745938	-0.685903	blue	Pav_sc0000130.1_g870.1.mk	0.745938	-0.764946	blue					novel.1139	0.888733	0.727412	turquoise
				Pav_sc0003492.1_g210.1.mk	0.888727	0.89686	turquoise	Pav_sc0000044.1_g560.1.mk	0.745019	-0.564709	blue	Pav_sc0000044.1_g560.1.mk	0.745019	-0.647637	blue					Pav_sc0003492.1_g210.1.mk	0.888727	0.835899	turquoise
				Pav_sc0000359.1_g730.1.br	0.888652	0.680886	turquoise	Pav_sc0004072.1_g010.1.mk	0.744561	-0.741177	blue	Pav_sc0004072.1_g010.1.mk	0.744561	-0.75871	blue					Pav_sc0000359.1_g730.1.br	0.888652	0.583895	turquoise
				novel.1335	-0.888469	-0.905392	turquoise	Pav_sc0000704.1_g900.1.mk	0.743238	-0.277814	blue	Pav_sc0000704.1_g900.1.mk	0.743238	-0.460219	blue					novel.1335	-0.888469	-0.885617	turquoise
				Pav_sc0000094.1_g700.1.mk	0.888427	0.80683	turquoise	Pav_sc0000984.1_g090.1.br	0.743231	-0.616052	blue	Pav_sc0000984.1_g090.1.br	0.743231	-0.703949	blue					Pav_sc0000094.1_g700.1.mk	0.888427	0.699091	turquoise
				Pav_sc0000622.1_g820.1.mk	0.88837	0.892788	turquoise	Pav_sc0002208.1_g070.1.mk	0.743073	-0.51661	blue	Pav_sc0002208.1_g070.1.mk	0.743073	-0.615556	blue					Pav_sc0000622.1_g820.1.mk	0.88837	0.916303	turquoise
				Pav_sc0000023.1_g140.1.br	0.888287	0.857295	turquoise	Pav_sc0000257.1_g550.1.mk	0.743034	-0.530119	blue	Pav_sc0000257.1_g550.1.mk	0.743034	-0.664432	blue					Pav_sc0000023.1_g140.1.br	0.888287	0.862824	turquoise
				Pav_sc0000311.1_g970.1.mk	0.888196	0.771098	turquoise	novel.1104	0.742943	-0.784204	blue	novel.1104	0.742943	-0.80455	blue					Pav_sc0000311.1_g970.1.mk	0.888196	0.66385	turquoise
				Pav_sc0000481.1_g130.1.mk	0.888028	0.848093	turquoise	Pav_sc0000030.1_g1050.1.mk	-0.742941	0.277235	blue	Pav_sc0000030.1_g1050.1.mk	-0.742941	0.42562	blue					Pav_sc0000481.1_g130.1.mk	0.888028	0.853075	turquoise
				Pav_sc0000164.1_g080.1.mk	0.887811	0.73745	turquoise	Pav_sc0000404.1_g050.1.mk	0.742338	-0.491061	blue	Pav_sc0000404.1_g050.1.mk	0.742338	-0.580526	blue					Pav_sc0000164.1_g080.1.mk	0.887811	0.693567	turquoise
				Pav_sc0001059.1_g590.1.mk	0.8871	0.821276	turquoise	Pav_sc0000212.1_g420.1.mk	0.742314	-0.470417	blue	Pav_sc0000212.1_g420.1.mk	0.742314	-0.581411	blue					Pav_sc0001059.1_g590.1.mk	0.8871	0.721616	turquoise
				Pav_sc0001699.1_g600.1.mk	0.887053	0.859213	turquoise	Pav_sc0005979.1_g010.1.br	0.742213	-0.563806	blue	Pav_sc0005979.1_g010.1.br	0.742213	-0.648262	blue					Pav_sc0001699.1_g600.1.mk	0.887053	0.820504	turquoise
				novel.1284	0.88684	0.697813	turquoise	Pav_sc0000036.1_g040.1.br	-0.742107	0.371853	blue	Pav_sc0000036.1_g040.1.br	-0.742107	0.498782	blue					novel.1284	0.88684	0.628217	turquoise
				Pav_sc0001224.1_g100.1.mk	0.886677	0.7511	turquoise	Pav_sc0000652.1_g270.1.mk	-0.741932	0.596806	blue	Pav_sc0000652.1_g270.1.mk	-0.741932	0.631024	blue					Pav_sc0001224.1_g100.1.mk	0.886677	0.689894	turquoise
				Pav_sc0000716.1_g520.1.mk	0.886633	0.752577	turquoise	Pav_sc0001643.1_g020.1.mk	0.741607	-0.410198	blue	Pav_sc0001643.1_g020.1.mk	0.741607	-0.54174	blue					Pav_sc0000716.1_g520.1.mk	0.886633	0.616374	turquoise
				Pav_sc0001341.1_g140.1.mk	0.886617	0.77506	turquoise	Pav_sc0000616.1_g170.1.mk	0.741527	-0.340494	blue	Pav_sc0000616.1_g170.1.mk	0.741527	-0.518661	blue					Pav_sc0001341.1_g140.1.mk	0.886617	0.68874	turquoise
				Pav_sc0000195.1_g410.1.mk	0.886396	0.683441	turquoise	Pav_sc0008178.1_g010.1.mk	0.741213	-0.594666	blue	Pav_sc0008178.1_g010.1.mk	0.741213	-0.664874	blue					Pav_sc0000195.1_g410.1.mk	0.886396	0.573708	turquoise
				Pav_sc0000362.1_g020.1.mk	0.886034	0.776561	turquoise	Pav_sc0000557.1_g810.1.mk	0.740892	-0.734516	blue	Pav_sc0000557.1_g810.1.mk	0.740892	-0.779081	blue					Pav_sc0000362.1_g020.1.mk	0.886034	0.739582	turquoise
				Pav_sc0003043.1_g100.1.mk	0.885712	0.87439	turquoise	Pav_sc0000556.1_g080.1.mk	0.740658	-0.641031	blue	Pav_sc0000556.1_g080.1.mk	0.740658	-0.68571	blue					Pav_sc0003043.1_g100.1.mk	0.885712	0.860535	turquoise
				novel.1086	0.88562	0.822375	turquoise	Pav_sc0000006.1_g120.1.mk	0.740008	-0.434521	blue	Pav_sc0000006.1_g120.1.mk	0.740008	-0.585446	blue					novel.1086	0.88562	0.736221	turquoise
				Pav_sc0001289.1_g490.1.mk	0.885443	0.909141	turquoise	Pav_sc0000652.1_g990.1.mk	0.739205	-0.571624	blue	Pav_sc0000652.1_g990.1.mk	0.739205	-0.661843	blue					Pav_sc0001289.1_g490.1.mk	0.885443	0.829972	turquoise
				Pav_sc0000503.1_g280.1.mk	0.885371	0.70489	turquoise	Pav_sc0000131.1_g360.1.mk	-0.738895	0.767481	blue	Pav_sc0000131.1_g360.1.mk	-0.738895	0.785459	blue					Pav_sc0000503.1_g280.1.mk	0.885371	0.672059	turquoise
				Pav_sc0003894.1_g030.1.mk	-0.885206	-0.895824	turquoise	Pav_sc0001938.1_g430.1.mk	0.737383	-0.507653	blue	Pav_sc0001938.1_g430.1.mk	0.737383	-0.620852	blue					Pav_sc0003894.1_g030.1.mk	-0.885206	-0.889213	turquoise
				Pav_sc0000129.1_g460.1.mk	0.884697	0.958142	turquoise	Pav_sc0000296.1_g040.1.mk	0.737274	-0.794643	blue	Pav_sc0000296.1_g040.1.mk	0.737274	-0.821533	blue					Pav_sc0000129.1_g460.1.mk	0.884697	0.920449	turquoise
				Pav_sc0000241.1_g080.1.mk	0.884656	0.675327	turquoise	Pav_sc0000663.1_g110.1.mk	0.736426	-0.489329	blue	Pav_sc0000663.1_g110.1.mk	0.736426	-0.566935	blue					Pav_sc0000241.1_g080.1.mk	0.884656	0.628223	turquoise
				Pav_sc0001040.1_g510.1.mk	0.884469	0.795584	turquoise	Pav_sc0003709.1_g070.1.mk	0.735901	-0.673559	blue	Pav_sc0003709.1_g070.1.mk	0.735901	-0.695769	blue					Pav_sc0001040.1_g510.1.mk	0.884469	0.781737	turquoise
				Pav_sc0001031.1_g080.1.mk	0.884458	0.878718	turquoise	Pav_sc0003845.1_g020.1.br	0.734736	-0.610482	blue	Pav_sc0003845.1_g020.1.br	0.734736	-0.670333	blue					Pav_sc0001031.1_g080.1.mk	0.884458	0.840795	turquoise
				Pav_sc0000009.1_g680.1.mk	0.884307	0.919397	turquoise	Pav_sc0000652.1_g210.1.mk	0.73418	-0.363596	blue	Pav_sc0000652.1_g210.1.mk	0.73418	-0.519482	blue					Pav_sc0000009.1_g680.1.mk	0.884307	0.89137	turquoise
				Pav_sc0002395.1_g010.1.mk	0.884114	0.701634	turquoise	Pav_sc0000719.1_g350.1.mk	-0.734128	0.592928	blue	Pav_sc0000719.1_g350.1.mk	-0.734128	0.669793	blue					Pav_sc0002395.1_g010.1.mk	0.884114	0.664555	turquoise
				Pav_sc0000354.1_g540.1.mk	0.883931	0.653765	turquoise	Pav_sc0000780.1_g280.1.br	-0.733903	0.726212	blue	Pav_sc0000780.1_g280.1.br	-0.733903	0.768684	blue					Pav_sc0000354.1_g540.1.mk	0.883931	0.600745	turquoise
				Pav_co4005891.1_g010.1.mk	0.883923	0.905952	turquoise	Pav_sc0000103.1_g660.1.mk	0.733568	-0.40785	blue	Pav_sc0000103.1_g660.1.mk	0.733568	-0.594222	blue					Pav_co4005891.1_g010.1.mk	0.883923	0.845314	turquoise
				Pav_sc0002080.1_g300.1.mk	0.883834	0.88164	turquoise	Pav_sc0001280.1_g430.1.mk	0.733029	-0.377451	blue	Pav_sc0001280.1_g430.1.mk	0.733029	-0.483734	blue					Pav_sc0002080.1_g300.1.mk	0.883834	0.903554	turquoise
				Pav_sc0000886.1_g680.1.mk	0.882974	0.836725	turquoise	Pav_sc0000396.1_g980.1.mk	-0.732717	0.850094	blue	Pav_sc0000396.1_g980.1.mk	-0.732717	0.848934	blue					Pav_sc0000886.1_g680.1.mk	0.882974	0.810874	turquoise
				Pav_sc0000910.1_g560.1.mk	0.882945	0.91019	turquoise	Pav_sc0003033.1_g040.1.mk	0.732485	-0.824564	blue	Pav_sc0003033.1_g040.1.mk	0.732485	-0.786748	blue					Pav_sc0000910.1_g560.1.mk	0.882945	0.837122	turquoise
				Pav_sc0000042.1_g520.1.mk	0.882426	0.679282	turquoise	Pav_sc0000052.1_g040.1.br	-0.73206	0.399188	blue	Pav_sc0000052.1_g040.1.br	-0.73206	0.571295	blue					Pav_sc0000042.1_g520.1.mk	0.882426	0.580932	turquoise
				Pav_sc0000622.1_g720.1.mk	0.882208	0.960375	turquoise	Pav_sc0003094.1_g030.1.br	-0.731828	0.660563	blue	Pav_sc0003094.1_g030.1.br	-0.731828	0.714155	blue					Pav_sc0000622.1_g720.1.mk	0.882208	0.885119	turquoise
				Pav_sc0000085.1_g220.1.mk	0.882177	0.734486	turquoise	Pav_sc0000031.1_g130.1.mk	-0.731782	0.834547	blue	Pav_sc0000031.1_g130.1.mk	-0.731782	0.825673	blue					Pav_sc0000085.1_g220.1.mk	0.882177	0.63752	turquoise
				Pav_sc0000983.1_g630.1.mk	0.88199	0.651838	turquoise	Pav_sc0000711.1_g010.1.mk	-0.731678	0.705117	blue	Pav_sc0000711.1_g010.1.mk	-0.731678	0.731004	blue					Pav_sc0000983.1_g630.1.mk	0.88199	0.59149	turquoise
				Pav_sc0001695.1_g290.1.mk	0.881697	0.74873	turquoise	Pav_sc0000055.1_g350.1.mk	-0.731342	0.331148	blue	Pav_sc0000055.1_g350.1.mk	-0.731342	0.457245	blue					Pav_sc0001695.1_g290.1.mk	0.881697	0.738281	turquoise
				Pav_sc0002080.1_g020.1.mk	0.881393	0.914021	turquoise	Pav_sc0000136.1_g410.1.br	0.730969	-0.517793	blue	Pav_sc0000136.1_g410.1.br	0.730969	-0.599142	blue					Pav_sc0002080.1_g020.1.mk	0.881393	0.900959	turquoise
				Pav_sc0000704.1_g030.1.mk	0.881379	0.940253	turquoise	Pav_sc0001974.1_g420.1.mk	-0.72993	0.25824	blue	Pav_sc0001974.1_g420.1.mk	-0.72993	0.461808	blue					Pav_sc0000704.1_g030.1.mk	0.881379	0.917137	turquoise
				Pav_sc0000094.1_g1210.1.mk	0.881155	0.77364	turquoise	Pav_sc0000908.1_g280.1.mk	0.728417	-0.596793	blue	Pav_sc0000908.1_g280.1.mk	0.728417	-0.669553	blue					Pav_sc0000094.1_g1210.1.mk	0.881155	0.698365	turquoise
				novel.194	0.880809	0.694623	turquoise	Pav_sc0000274.1_g080.1.mk	0.728392	-0.682698	blue	Pav_sc0000274.1_g080.1.mk	0.728392	-0.704105	blue					novel.194	0.880809	0.577787	turquoise
				Pav_sc0007964.1_g020.1.br	0.880685	0.690684	turquoise	Pav_sc0000220.1_g740.1.mk	-0.72685	0.836439	blue	Pav_sc0000220.1_g740.1.mk	-0.72685	0.823987	blue					Pav_sc0007964.1_g020.1.br	0.880685	0.606809	turquoise
				Pav_sc0000464.1_g820.1.mk	0.880645	0.890159	turquoise	Pav_sc0001405.1_g430.1.mk	0.726697	-0.421318	blue	Pav_sc0001405.1_g430.1.mk	0.726697	-0.547184	blue					Pav_sc0000464.1_g820.1.mk	0.880645	0.856923	turquoise
				Pav_sc0006018.1_g280.1.mk	0.880434	0.934895	turquoise	Pav_sc0000376.1_g640.1.mk	0.726447	-0.570081	blue	Pav_sc0000376.1_g640.1.mk	0.726447	-0.641224	blue					Pav_sc0006018.1_g280.1.mk	0.880434	0.934038	turquoise
				novel.1151	0.880418	0.770681	turquoise	Pav_sc0004314.1_g040.1.mk	0.726327	-0.39464	blue	Pav_sc0004314.1_g040.1.mk	0.726327	-0.494833	blue					novel.1151	0.880418	0.746653	turquoise
				Pav_sc0003135.1_g200.1.mk	0.880369	0.798519	turquoise	Pav_sc0006695.1_g010.1.mk	-0.726103	0.474087	blue	Pav_sc0006695.1_g010.1.mk	-0.726103	0.570903	blue					Pav_sc0003135.1_g200.1.mk	0.880369	0.81798	turquoise
				Pav_sc0000600.1_g090.1.mk	0.880081	0.838811	turquoise	novel.1299	-0.725064	0.338542	blue	novel.1299	-0.725064	0.514237	blue					Pav_sc0000600.1_g090.1.mk	0.880081	0.765095	turquoise
				Pav_sc0000465.1_g950.1.mk	0.879972	0.848417	turquoise	Pav_sc0001080.1_g1080.1.mk	-0.724421	0.581088	blue	Pav_sc0001080.1_g1080.1.mk	-0.724421	0.611748	blue					Pav_sc0000465.1_g950.1.mk	0.879972	0.785393	turquoise
				Pav_sc0000375.1_g400.1.mk	0.879891	0.962144	turquoise	Pav_sc0000766.1_g260.1.mk	0.722774	-0.441972	blue	Pav_sc0000766.1_g260.1.mk	0.722774	-0.563907	blue					Pav_sc0000375.1_g400.1.mk	0.879891	0.946434	turquoise
				Pav_sc0001781.1_g080.1.mk	0.879811	0.713824	turquoise	Pav_sc0000221.1_g500.1.mk	0.721845	-0.391263	blue	Pav_sc0000221.1_g500.1.mk	0.721845	-0.524424	blue					Pav_sc0001781.1_g080.1.mk	0.879811	0.700083	turquoise
				Pav_sc0000568.1_g340.1.mk	-0.879523	-0.884478	turquoise	Pav_sc0001503.1_g050.1.br	0.721778	-0.64856	blue	Pav_sc0001503.1_g050.1.br	0.721778	-0.72029	blue					Pav_sc0000568.1_g340.1.mk	-0.879523	-0.84689	turquoise
				Pav_sc0000583.1_g1300.1.mk	0.879481	0.896612	turquoise	novel.922	-0.720984	0.371599	blue	novel.922	-0.720984	0.488625	blue					Pav_sc0000583.1_g1300.1.mk	0.879481	0.92381	turquoise
				Pav_sc0000254.1_g1110.1.mk	0.879458	0.764095	turquoise	Pav_sc0005591.1_g020.1.mk	0.720774	-0.691416	blue	Pav_sc0005591.1_g020.1.mk	0.720774	-0.763303	blue					Pav_sc0000254.1_g1110.1.mk	0.879458	0.681056	turquoise
				Pav_sc0001699.1_g690.1.mk	0.879125	0.747723	turquoise	Pav_sc0000129.1_g1150.1.br	0.720094	-0.619461	blue	Pav_sc0000129.1_g1150.1.br	0.720094	-0.674322	blue					Pav_sc0001699.1_g690.1.mk	0.879125	0.659385	turquoise
				Pav_sc0002234.1_g060.1.mk	0.879102	0.716335	turquoise	novel.505	0.719882	-0.656368	blue	novel.505	0.719882	-0.659869	blue					Pav_sc0002234.1_g060.1.mk	0.879102	0.616506	turquoise
				Pav_sc0000129.1_g500.1.br	0.879009	0.785255	turquoise	Pav_sc0001405.1_g150.1.mk	0.719335	-0.47789	blue	Pav_sc0001405.1_g150.1.mk	0.719335	-0.593256	blue					Pav_sc0000129.1_g500.1.br	0.879009	0.772866	turquoise
				Pav_sc0000044.1_g190.1.mk	0.878527	0.882869	turquoise	Pav_sc0002474.1_g360.1.br	-0.718757	0.664361	blue	Pav_sc0002474.1_g360.1.br	-0.718757	0.692916	blue					Pav_sc0000044.1_g190.1.mk	0.878527	0.88749	turquoise
				Pav_sc0000375.1_g110.1.mk	0.878475	0.875179	turquoise	Pav_sc0002433.1_g070.1.mk	0.718269	-0.49558	blue	Pav_sc0002433.1_g070.1.mk	0.718269	-0.619104	blue					Pav_sc0000375.1_g110.1.mk	0.878475	0.750873	turquoise
				Pav_sc0003946.1_g060.1.mk	0.87835	0.936892	turquoise	Pav_sc0002176.1_g160.1.mk	-0.71818	0.794155	blue	Pav_sc0002176.1_g160.1.mk	-0.71818	0.797146	blue					Pav_sc0003946.1_g060.1.mk	0.87835	0.935686	turquoise
				Pav_sc0004614.1_g010.1.mk	0.878119	0.665944	turquoise	Pav_sc0001236.1_g220.1.mk	0.716905	-0.480338	blue	Pav_sc0001236.1_g220.1.mk	0.716905	-0.568503	blue					Pav_sc0004614.1_g010.1.mk	0.878119	0.596442	turquoise
				novel.964	0.877932	0.662229	turquoise	Pav_sc0009583.1_g010.1.mk	0.71562	-0.379632	blue	Pav_sc0009583.1_g010.1.mk	0.71562	-0.498234	blue					novel.964	0.877932	0.612347	turquoise
				Pav_sc0000164.1_g220.1.mk	0.877737	0.644927	turquoise	Pav_sc0000229.1_g190.1.mk	0.715171	-0.279873	blue	Pav_sc0000229.1_g190.1.mk	0.715171	-0.471077	blue					Pav_sc0000164.1_g220.1.mk	0.877737	0.573534	turquoise
				novel.1041	0.877587	0.690045	turquoise	Pav_sc0001030.1_g260.1.mk	0.714656	-0.63355	blue	Pav_sc0001030.1_g260.1.mk	0.714656	-0.695681	blue					novel.1041	0.877587	0.601622	turquoise
				Pav_sc0000119.1_g630.1.mk	0.8775	0.728998	turquoise	Pav_sc0000562.1_g100.1.mk	0.713298	-0.37825	blue	Pav_sc0000562.1_g100.1.mk	0.713298	-0.49316	blue					Pav_sc0000119.1_g630.1.mk	0.8775	0.668228	turquoise
				Pav_sc0000981.1_g210.1.mk	0.877165	0.711305	turquoise	Pav_sc0000348.1_g820.1.mk	0.713246	-0.411332	blue	Pav_sc0000348.1_g820.1.mk	0.713246	-0.54482	blue					Pav_sc0000981.1_g210.1.mk	0.877165	0.638721	turquoise
				Pav_sc0000396.1_g1070.1.mk	0.877125	0.874618	turquoise	Pav_sc0000100.1_g210.1.br	0.71198	-0.637562	blue	Pav_sc0000100.1_g210.1.br	0.71198	-0.713279	blue					Pav_sc0000396.1_g1070.1.mk	0.877125	0.848826	turquoise
				Pav_sc0000040.1_g770.1.mk	0.877045	0.72345	turquoise	Pav_sc0000624.1_g210.1.mk	0.711375	-0.532765	blue	Pav_sc0000624.1_g210.1.mk	0.711375	-0.583121	blue					Pav_sc0000040.1_g770.1.mk	0.877045	0.656629	turquoise
				Pav_sc0000554.1_g1690.1.mk	0.876767	0.633929	turquoise	Pav_sc0006061.1_g110.1.mk	0.711096	-0.400204	blue	Pav_sc0006061.1_g110.1.mk	0.711096	-0.516533	blue					Pav_sc0000554.1_g1690.1.mk	0.876767	0.560992	turquoise
				Pav_sc0000381.1_g010.1.mk	-0.876758	-0.899996	turquoise	Pav_sc0000207.1_g720.1.mk	0.710947	-0.418643	blue	Pav_sc0000207.1_g720.1.mk	0.710947	-0.548347	blue					Pav_sc0000381.1_g010.1.mk	-0.876758	-0.911746	turquoise
				Pav_sc0000583.1_g1060.1.mk	0.876672	0.685583	turquoise	Pav_sc0000103.1_g420.1.mk	-0.710873	0.744461	blue	Pav_sc0000103.1_g420.1.mk	-0.710873	0.768016	blue					Pav_sc0000583.1_g1060.1.mk	0.876672	0.649848	turquoise
				Pav_sc0000905.1_g110.1.br	0.876435	0.803551	turquoise	Pav_sc0000491.1_g1290.1.mk	0.708073	-0.555989	blue	Pav_sc0000491.1_g1290.1.mk	0.708073	-0.582597	blue					Pav_sc0000905.1_g110.1.br	0.876435	0.710234	turquoise
				Pav_sc0000823.1_g140.1.mk	0.876425	0.908371	turquoise	Pav_sc0000480.1_g1090.1.mk	0.707509	-0.456745	blue	Pav_sc0000480.1_g1090.1.mk	0.707509	-0.571609	blue					Pav_sc0000823.1_g140.1.mk	0.876425	0.939295	turquoise
				Pav_sc0003135.1_g120.1.mk	0.876424	0.832464	turquoise	Pav_sc0001502.1_g150.1.mk	0.707394	-0.557177	blue	Pav_sc0001502.1_g150.1.mk	0.707394	-0.585536	blue					Pav_sc0003135.1_g120.1.mk	0.876424	0.692354	turquoise
				Pav_sc0000300.1_g090.1.mk	0.87627	0.643182	turquoise	Pav_sc0009766.1_g010.1.mk	0.706339	-0.436874	blue	Pav_sc0009766.1_g010.1.mk	0.706339	-0.528033	blue					Pav_sc0000300.1_g090.1.mk	0.87627	0.571365	turquoise
				Pav_sc0000557.1_g340.1.mk	0.876268	0.659073	turquoise	Pav_sc0006402.1_g100.1.mk	0.706092	-0.52211	blue	Pav_sc0006402.1_g100.1.mk	0.706092	-0.654321	blue					Pav_sc0000557.1_g340.1.mk	0.876268	0.565122	turquoise
				Pav_sc0003093.1_g020.1.br	-0.876138	-0.858323	turquoise	novel.517	0.704312	-0.35581	blue	novel.517	0.704312	-0.473891	blue					Pav_sc0003093.1_g020.1.br	-0.876138	-0.822905	turquoise
				Pav_sc0000110.1_g240.1.mk	0.875973	0.678199	turquoise	Pav_sc0001797.1_g070.1.mk	0.704016	-0.403992	blue	Pav_sc0001797.1_g070.1.mk	0.704016	-0.511285	blue					Pav_sc0000110.1_g240.1.mk	0.875973	0.581019	turquoise
				Pav_sc0001084.1_g380.1.mk	0.875931	0.821402	turquoise	Pav_sc0006018.1_g250.1.mk	0.702507	-0.824984	blue	Pav_sc0006018.1_g250.1.mk	0.702507	-0.822921	blue					Pav_sc0001084.1_g380.1.mk	0.875931	0.71047	turquoise
				Pav_sc0001503.1_g060.1.br	0.87587	0.650137	turquoise	Pav_sc0000586.1_g760.1.mk	0.702238	-0.376585	blue	Pav_sc0000586.1_g760.1.mk	0.702238	-0.497701	blue					Pav_sc0001503.1_g060.1.br	0.87587	0.556864	turquoise
				novel.343	0.875848	0.639016	turquoise	Pav_sc0000358.1_g370.1.mk	0.701743	-0.769141	blue	Pav_sc0000358.1_g370.1.mk	0.701743	-0.787823	blue					novel.343	0.875848	0.553847	turquoise
				Pav_sc0000599.1_g050.1.mk	0.875628	0.845942	turquoise	Pav_sc0000549.1_g730.1.mk	0.699378	-0.619755	blue	Pav_sc0000549.1_g730.1.mk	0.699378	-0.687682	blue					Pav_sc0000599.1_g050.1.mk	0.875628	0.880846	turquoise
				Pav_sc0000488.1_g610.1.mk	0.875367	0.897901	turquoise	Pav_sc0001102.1_g720.1.mk	-0.698581	0.730143	blue	Pav_sc0001102.1_g720.1.mk	-0.698581	0.746701	blue					Pav_sc0000488.1_g610.1.mk	0.875367	0.863137	turquoise
				Pav_sc0000679.1_g490.1.mk	0.875105	0.722794	turquoise	novel.947	0.698537	-0.646814	blue	novel.947	0.698537	-0.691534	blue					Pav_sc0000679.1_g490.1.mk	0.875105	0.633119	turquoise
				Pav_sc0000661.1_g040.1.mk	0.874924	0.625994	turquoise	Pav_sc0000107.1_g360.1.mk	0.697825	-0.575884	blue	Pav_sc0000107.1_g360.1.mk	0.697825	-0.609207	blue					Pav_sc0000661.1_g040.1.mk	0.874924	0.5557	turquoise
				Pav_sc0002208.1_g240.1.mk	0.874871	0.632427	turquoise	Pav_sc0000638.1_g670.1.mk	0.695945	-0.568348	blue	Pav_sc0000638.1_g670.1.mk	0.695945	-0.633057	blue					Pav_sc0002208.1_g240.1.mk	0.874871	0.567891	turquoise
				Pav_sc0001217.1_g040.1.mk	0.874702	0.907925	turquoise	Pav_sc0000752.1_g040.1.br	0.691905	-0.484762	blue	Pav_sc0000752.1_g040.1.br	0.691905	-0.565343	blue					Pav_sc0001217.1_g040.1.mk	0.874702	0.871333	turquoise
				Pav_sc0000099.1_g740.1.mk	0.874658	0.894172	turquoise	Pav_sc0007796.1_g160.1.mk	0.690626	-0.438299	blue	Pav_sc0007796.1_g160.1.mk	0.690626	-0.536465	blue					Pav_sc0000099.1_g740.1.mk	0.874658	0.925161	turquoise
				Pav_sc0007822.1_g010.1.mk	0.874657	0.667763	turquoise	Pav_sc0005810.1_g020.1.mk	0.690338	-0.249626	blue	Pav_sc0005810.1_g020.1.mk	0.690338	-0.456678	blue					Pav_sc0007822.1_g010.1.mk	0.874657	0.567159	turquoise
				novel.447	0.874632	0.666922	turquoise	novel.1200	0.689232	-0.594075	blue	novel.1200	0.689232	-0.663088	blue					novel.447	0.874632	0.625091	turquoise
				Pav_sc0003104.1_g020.1.br	0.874475	0.655857	turquoise	Pav_sc0000617.1_g180.1.mk	0.688033	-0.426715	blue	Pav_sc0000617.1_g180.1.mk	0.688033	-0.509369	blue					Pav_sc0003104.1_g020.1.br	0.874475	0.580942	turquoise
				Pav_sc0000629.1_g010.1.mk	0.874153	0.96696	turquoise	Pav_sc0004547.1_g070.1.br	0.685129	-0.510852	blue	Pav_sc0004547.1_g070.1.br	0.685129	-0.574728	blue					Pav_sc0000629.1_g010.1.mk	0.874153	0.977359	turquoise
				Pav_sc0004637.1_g030.1.mk	0.874139	0.806916	turquoise	Pav_sc0002706.1_g040.1.mk	0.682101	-0.576673	blue	Pav_sc0002706.1_g040.1.mk	0.682101	-0.621612	blue					Pav_sc0004637.1_g030.1.mk	0.874139	0.692521	turquoise
				Pav_sc0004999.1_g030.1.mk	0.874136	0.925725	turquoise	Pav_sc0001827.1_g190.1.mk	-0.681159	0.532627	blue	Pav_sc0001827.1_g190.1.mk	-0.681159	0.567647	blue					Pav_sc0004999.1_g030.1.mk	0.874136	0.874301	turquoise
				Pav_sc0000348.1_g210.1.mk	0.874112	0.831051	turquoise	Pav_sc0000003.1_g010.1.mk	0.679145	-0.487912	blue	Pav_sc0000003.1_g010.1.mk	0.679145	-0.597002	blue					Pav_sc0000348.1_g210.1.mk	0.874112	0.739832	turquoise
				Pav_sc0000540.1_g320.1.mk	0.87405	0.760404	turquoise	Pav_sc0001046.1_g240.1.mk	-0.679035	0.388925	blue	Pav_sc0001046.1_g240.1.mk	-0.679035	0.520823	blue					Pav_sc0000540.1_g320.1.mk	0.87405	0.752525	turquoise
				Pav_sc0002828.1_g100.1.mk	0.874016	0.815242	turquoise	Pav_sc0000728.1_g010.1.mk	0.676852	-0.362474	blue	Pav_sc0000728.1_g010.1.mk	0.676852	-0.525264	blue					Pav_sc0002828.1_g100.1.mk	0.874016	0.858608	turquoise
				Pav_sc0000357.1_g020.1.mk	0.873419	0.864996	turquoise	Pav_sc0001134.1_g190.1.mk	0.676551	-0.352991	blue	Pav_sc0001134.1_g190.1.mk	0.676551	-0.457502	blue					Pav_sc0000357.1_g020.1.mk	0.873419	0.850706	turquoise
				novel.281	0.873259	0.925012	turquoise	novel.1294	-0.675817	0.215141	blue	novel.1294	-0.675817	0.43094	blue					novel.281	0.873259	0.939656	turquoise
				Pav_sc0001992.1_g060.1.mk	0.873222	0.92125	turquoise	Pav_sc0010978.1_g010.1.br	-0.675363	0.520619	blue	Pav_sc0010978.1_g010.1.br	-0.675363	0.594345	blue					Pav_sc0001992.1_g060.1.mk	0.873222	0.917531	turquoise
				Pav_sc0002387.1_g380.1.mk	0.872451	0.711199	turquoise	novel.777	0.674969	-0.402958	blue	novel.777	0.674969	-0.508851	blue					Pav_sc0002387.1_g380.1.mk	0.872451	0.652283	turquoise
				Pav_sc0003135.1_g860.1.mk	0.872449	0.743745	turquoise	Pav_sc0001196.1_g1950.1.mk	-0.674059	0.580255	blue	Pav_sc0001196.1_g1950.1.mk	-0.674059	0.701571	blue					Pav_sc0003135.1_g860.1.mk	0.872449	0.610063	turquoise
				Pav_sc0000754.1_g440.1.mk	0.872278	0.907251	turquoise	Pav_sc0002858.1_g270.1.br	0.673616	-0.517524	blue	Pav_sc0002858.1_g270.1.br	0.673616	-0.56213	blue					Pav_sc0000754.1_g440.1.mk	0.872278	0.84269	turquoise
				Pav_sc0000813.1_g120.1.mk	0.87202	0.62939	turquoise	Pav_sc0000590.1_g030.1.mk	0.673559	-0.632568	blue	Pav_sc0000590.1_g030.1.mk	0.673559	-0.654873	blue					Pav_sc0000813.1_g120.1.mk	0.87202	0.567314	turquoise
				Pav_co4029927.1_g010.1.br	0.871585	0.65126	turquoise	Pav_sc0001341.1_g250.1.mk	0.673244	-0.600015	blue	Pav_sc0001341.1_g250.1.mk	0.673244	-0.633452	blue					Pav_co4029927.1_g010.1.br	0.871585	0.599767	turquoise
				Pav_co4034867.1_g010.1.br	0.871484	0.662048	turquoise	Pav_sc0000488.1_g420.1.mk	-0.672495	0.150235	blue	Pav_sc0000488.1_g420.1.mk	-0.672495	0.364812	blue					Pav_co4034867.1_g010.1.br	0.871484	0.583894	turquoise
				Pav_sc0000119.1_g610.1.mk	0.871206	0.625483	turquoise	Pav_sc0001275.1_g040.1.mk	0.672205	-0.293065	blue	Pav_sc0001275.1_g040.1.mk	0.672205	-0.438309	blue					Pav_sc0000119.1_g610.1.mk	0.871206	0.552584	turquoise
				Pav_sc0003618.1_g030.1.mk	0.871166	0.712601	turquoise	Pav_sc0000700.1_g230.1.mk	-0.672125	0.524379	blue	Pav_sc0000700.1_g230.1.mk	-0.672125	0.646029	blue					Pav_sc0003618.1_g030.1.mk	0.871166	0.687235	turquoise
				Pav_sc0004456.1_g180.1.mk	0.871102	0.816225	turquoise	Pav_sc0000251.1_g160.1.mk	0.67143	-0.550682	blue	Pav_sc0000251.1_g160.1.mk	0.67143	-0.594045	blue					Pav_sc0004456.1_g180.1.mk	0.871102	0.823126	turquoise
				Pav_sc0000065.1_g210.1.mk	0.870761	0.880825	turquoise	Pav_sc0002575.1_g080.1.mk	0.670491	-0.474029	blue	Pav_sc0002575.1_g080.1.mk	0.670491	-0.598247	blue					Pav_sc0000065.1_g210.1.mk	0.870761	0.882738	turquoise
				Pav_sc0000099.1_g910.1.mk	0.870578	0.642241	turquoise	Pav_sc0000212.1_g1230.1.mk	0.67044	-0.367238	blue	Pav_sc0000212.1_g1230.1.mk	0.67044	-0.478293	blue					Pav_sc0000099.1_g910.1.mk	0.870578	0.59606	turquoise
				Pav_sc0001416.1_g160.1.mk	0.870147	0.899925	turquoise	Pav_sc0004735.1_g140.1.mk	0.669572	-0.165882	blue	Pav_sc0004735.1_g140.1.mk	0.669572	-0.353638	blue					Pav_sc0001416.1_g160.1.mk	0.870147	0.895633	turquoise
				Pav_sc0000506.1_g160.1.mk	0.869746	0.669204	turquoise	Pav_sc0007668.1_g040.1.mk	0.667835	-0.389528	blue	Pav_sc0007668.1_g040.1.mk	0.667835	-0.493808	blue					Pav_sc0000506.1_g160.1.mk	0.869746	0.588375	turquoise
				Pav_sc0001061.1_g030.1.mk	0.869699	0.690531	turquoise	Pav_sc0001663.1_g180.1.mk	0.666655	-0.271303	blue	Pav_sc0001663.1_g180.1.mk	0.666655	-0.439444	blue					Pav_sc0001061.1_g030.1.mk	0.869699	0.656775	turquoise
				Pav_sc0000491.1_g500.1.mk	0.869641	0.787043	turquoise	Pav_sc0001046.1_g560.1.mk	-0.666558	0.447613	blue	Pav_sc0001046.1_g560.1.mk	-0.666558	0.579545	blue					Pav_sc0000491.1_g500.1.mk	0.869641	0.747794	turquoise
				Pav_sc0000363.1_g390.1.mk	0.869449	0.68369	turquoise	Pav_sc0000704.1_g890.1.mk	0.666287	-0.279649	blue	Pav_sc0000704.1_g890.1.mk	0.666287	-0.466775	blue					Pav_sc0000363.1_g390.1.mk	0.869449	0.606022	turquoise
				Pav_sc0000597.1_g050.1.mk	0.869381	0.651561	turquoise	Pav_sc0000027.1_g160.1.br	0.66617	-0.354264	blue	Pav_sc0000027.1_g160.1.br	0.66617	-0.484086	blue					Pav_sc0000597.1_g050.1.mk	0.869381	0.524521	turquoise
				Pav_sc0000009.1_g530.1.mk	-0.869326	-0.882121	turquoise	Pav_sc0001502.1_g540.1.mk	0.665513	-0.383741	blue	Pav_sc0001502.1_g540.1.mk	0.665513	-0.481479	blue					Pav_sc0000009.1_g530.1.mk	-0.869326	-0.852559	turquoise
				Pav_sc0001051.1_g180.1.mk	0.869206	0.648057	turquoise	Pav_sc0000062.1_g380.1.mk	0.664705	-0.761971	blue	Pav_sc0000062.1_g380.1.mk	0.664705	-0.733437	blue					Pav_sc0001051.1_g180.1.mk	0.869206	0.579932	turquoise
				Pav_sc0003098.1_g160.1.mk	0.869082	0.637438	turquoise	Pav_sc0000026.1_g750.1.br	0.663786	-0.458923	blue	Pav_sc0000026.1_g750.1.br	0.663786	-0.544436	blue					Pav_sc0003098.1_g160.1.mk	0.869082	0.578763	turquoise
				Pav_sc0001080.1_g590.1.mk	0.868655	0.903726	turquoise	Pav_sc0000089.1_g030.1.mk	0.663736	-0.124054	blue	Pav_sc0000089.1_g030.1.mk	0.663736	-0.308913	blue					Pav_sc0001080.1_g590.1.mk	0.868655	0.809946	turquoise
				Pav_sc0001944.1_g040.1.mk	0.868309	0.857269	turquoise	Pav_sc0000736.1_g010.1.mk	-0.662055	0.665856	blue	Pav_sc0000736.1_g010.1.mk	-0.662055	0.662494	blue					Pav_sc0001944.1_g040.1.mk	0.868309	0.849859	turquoise
				Pav_sc0000373.1_g500.1.mk	0.8683	0.732667	turquoise	Pav_sc0000100.1_g240.1.br	0.660463	-0.540161	blue	Pav_sc0000100.1_g240.1.br	0.660463	-0.617494	blue					Pav_sc0000373.1_g500.1.mk	0.8683	0.723653	turquoise
				Pav_sc0000454.1_g150.1.mk	-0.868248	-0.875467	turquoise	Pav_sc0003169.1_g090.1.mk	-0.659595	0.589219	blue	Pav_sc0003169.1_g090.1.mk	-0.659595	0.584074	blue					Pav_sc0000454.1_g150.1.mk	-0.868248	-0.843928	turquoise
				Pav_sc0000758.1_g420.1.mk	0.867945	0.871881	turquoise	Pav_sc0000852.1_g460.1.mk	-0.658842	0.572358	blue	Pav_sc0000852.1_g460.1.mk	-0.658842	0.647906	blue					Pav_sc0000758.1_g420.1.mk	0.867945	0.784695	turquoise
				Pav_sc0001098.1_g010.1.mk	0.867757	0.779694	turquoise	Pav_sc0000102.1_g430.1.mk	0.657278	-0.372508	blue	Pav_sc0000102.1_g430.1.mk	0.657278	-0.491274	blue					Pav_sc0001098.1_g010.1.mk	0.867757	0.772627	turquoise
				Pav_sc0000205.1_g330.1.mk	0.867687	0.663133	turquoise	Pav_sc0006091.1_g050.1.mk	0.654922	-0.328657	blue	Pav_sc0006091.1_g050.1.mk	0.654922	-0.501409	blue					Pav_sc0000205.1_g330.1.mk	0.867687	0.59351	turquoise
				Pav_sc0001217.1_g110.1.mk	0.867643	0.850654	turquoise	Pav_sc0000311.1_g260.1.mk	0.654253	-0.485203	blue	Pav_sc0000311.1_g260.1.mk	0.654253	-0.558282	blue					Pav_sc0001217.1_g110.1.mk	0.867643	0.849595	turquoise
				Pav_sc0000648.1_g510.1.br	0.867598	0.628868	turquoise	Pav_sc0001243.1_g530.1.mk	-0.654196	0.589912	blue	Pav_sc0001243.1_g530.1.mk	-0.654196	0.634475	blue					Pav_sc0000648.1_g510.1.br	0.867598	0.561096	turquoise
				Pav_sc0004416.1_g040.1.mk	0.86741	0.74716	turquoise	Pav_sc0000691.1_g190.1.mk	-0.653954	0.294161	blue	Pav_sc0000691.1_g190.1.mk	-0.653954	0.479612	blue					Pav_sc0004416.1_g040.1.mk	0.86741	0.710622	turquoise
				novel.1164	0.867099	0.617487	turquoise	Pav_sc0001453.1_g110.1.mk	0.653102	-0.204021	blue	Pav_sc0001453.1_g110.1.mk	0.653102	-0.388657	blue					novel.1164	0.867099	0.548847	turquoise
				Pav_sc0000195.1_g470.1.mk	0.867045	0.667465	turquoise	Pav_sc0003952.1_g010.1.mk	-0.648752	0.172924	blue	Pav_sc0003952.1_g010.1.mk	-0.648752	0.33708	blue					Pav_sc0000195.1_g470.1.mk	0.867045	0.627693	turquoise
				Pav_sc0005236.1_g010.1.br	0.867023	0.817726	turquoise	Pav_sc0000363.1_g360.1.mk	-0.648726	0.244214	blue	Pav_sc0000363.1_g360.1.mk	-0.648726	0.430355	blue					Pav_sc0005236.1_g010.1.br	0.867023	0.782895	turquoise
				Pav_sc0000373.1_g800.1.mk	0.866801	0.924666	turquoise	Pav_sc0000764.1_g280.1.br	0.648017	-0.44358	blue	Pav_sc0000764.1_g280.1.br	0.648017	-0.517808	blue					Pav_sc0000373.1_g800.1.mk	0.866801	0.901793	turquoise
				Pav_sc0000893.1_g290.1.mk	0.866768	0.92444	turquoise	Pav_sc0000042.1_g240.1.mk	-0.648016	0.205358	blue	Pav_sc0000042.1_g240.1.mk	-0.648016	0.395816	blue					Pav_sc0000893.1_g290.1.mk	0.866768	0.839441	turquoise
				Pav_sc0000652.1_g070.1.mk	0.866652	0.859162	turquoise	Pav_sc0001060.1_g040.1.br	-0.647288	0.512429	blue	Pav_sc0001060.1_g040.1.br	-0.647288	0.659389	blue					Pav_sc0000652.1_g070.1.mk	0.866652	0.868796	turquoise
				Pav_sc0001710.1_g1210.1.mk	0.86659	0.726291	turquoise	Pav_sc0000410.1_g680.1.mk	0.646581	-0.336139	blue	Pav_sc0000410.1_g680.1.mk	0.646581	-0.463339	blue					Pav_sc0001710.1_g1210.1.mk	0.86659	0.70025	turquoise
				Pav_sc0001023.1_g020.1.mk	0.866135	0.794339	turquoise	Pav_sc0000119.1_g210.1.br	0.645219	-0.464087	blue	Pav_sc0000119.1_g210.1.br	0.645219	-0.540927	blue					Pav_sc0001023.1_g020.1.mk	0.866135	0.789768	turquoise
				novel.1025	0.866042	0.74052	turquoise	Pav_sc0000212.1_g080.1.br	0.644751	-0.742612	blue	Pav_sc0000212.1_g080.1.br	0.644751	-0.744067	blue					novel.1025	0.866042	0.663246	turquoise
				Pav_sc0000373.1_g490.1.mk	0.865968	0.846893	turquoise	Pav_sc0000683.1_g150.1.mk	0.644398	-0.200231	blue	Pav_sc0000683.1_g150.1.mk	0.644398	-0.379632	blue					Pav_sc0000373.1_g490.1.mk	0.865968	0.817545	turquoise
				Pav_sc0000465.1_g1310.1.mk	0.86587	0.631746	turquoise	Pav_sc0001502.1_g160.1.mk	0.644148	-0.347808	blue	Pav_sc0001502.1_g160.1.mk	0.644148	-0.439394	blue					Pav_sc0000465.1_g1310.1.mk	0.86587	0.563324	turquoise
				Pav_sc0001084.1_g100.1.mk	0.865602	0.88733	turquoise	Pav_sc0001335.1_g550.1.mk	0.640247	-0.577763	blue	Pav_sc0001335.1_g550.1.mk	0.640247	-0.637263	blue					Pav_sc0001084.1_g100.1.mk	0.865602	0.868253	turquoise
				Pav_sc0001196.1_g1870.1.mk	0.865592	0.839828	turquoise	Pav_sc0000652.1_g1160.1.mk	0.640034	-0.401206	blue	Pav_sc0000652.1_g1160.1.mk	0.640034	-0.508097	blue					Pav_sc0001196.1_g1870.1.mk	0.865592	0.812639	turquoise
				Pav_sc0000322.1_g180.1.br	0.865521	0.884297	turquoise	Pav_sc0000030.1_g1280.1.mk	0.639295	-0.363937	blue	Pav_sc0000030.1_g1280.1.mk	0.639295	-0.50352	blue					Pav_sc0000322.1_g180.1.br	0.865521	0.864884	turquoise
				Pav_sc0000999.1_g110.1.mk	0.865493	0.663857	turquoise	Pav_sc0000323.1_g910.1.mk	0.638859	-0.566027	blue	Pav_sc0000323.1_g910.1.mk	0.638859	-0.603522	blue					Pav_sc0000999.1_g110.1.mk	0.865493	0.588091	turquoise
				Pav_sc0000220.1_g920.1.mk	0.865383	0.78707	turquoise	Pav_sc0000464.1_g130.1.br	-0.637942	0.325214	blue	Pav_sc0000464.1_g130.1.br	-0.637942	0.437732	blue					Pav_sc0000220.1_g920.1.mk	0.865383	0.731286	turquoise
				Pav_sc0000028.1_g420.1.mk	0.865307	0.777381	turquoise	Pav_sc0005984.1_g050.1.mk	0.63721	-0.316636	blue	Pav_sc0005984.1_g050.1.mk	0.63721	-0.455583	blue					Pav_sc0000028.1_g420.1.mk	0.865307	0.784212	turquoise
				Pav_sc0001102.1_g1040.1.mk	0.865198	0.626961	turquoise	Pav_sc0002360.1_g510.1.mk	-0.635995	0.161725	blue	Pav_sc0002360.1_g510.1.mk	-0.635995	0.324216	blue					Pav_sc0001102.1_g1040.1.mk	0.865198	0.566696	turquoise
				Pav_sc0001009.1_g500.1.mk	0.865032	0.832221	turquoise	Pav_sc0000852.1_g020.1.mk	-0.635596	0.534985	blue	Pav_sc0000852.1_g020.1.mk	-0.635596	0.592265	blue					Pav_sc0001009.1_g500.1.mk	0.865032	0.78733	turquoise
				Pav_sc0000852.1_g880.1.mk	0.864656	0.758011	turquoise	Pav_sc0000731.1_g100.1.br	0.634459	-0.383186	blue	Pav_sc0000731.1_g100.1.br	0.634459	-0.477122	blue					Pav_sc0000852.1_g880.1.mk	0.864656	0.798683	turquoise
				Pav_sc0000599.1_g130.1.mk	-0.86451	-0.861548	turquoise	Pav_sc0000998.1_g070.1.mk	0.633435	-0.381576	blue	Pav_sc0000998.1_g070.1.mk	0.633435	-0.492901	blue					Pav_sc0000599.1_g130.1.mk	-0.86451	-0.839251	turquoise
				Pav_sc0001769.1_g100.1.mk	0.864438	0.73041	turquoise	Pav_sc0002207.1_g100.1.mk	0.631301	-0.415161	blue	Pav_sc0002207.1_g100.1.mk	0.631301	-0.490614	blue					Pav_sc0001769.1_g100.1.mk	0.864438	0.728262	turquoise
				Pav_sc0002835.1_g130.1.mk	0.864434	0.618544	turquoise	Pav_sc0000017.1_g410.1.mk	0.630293	-0.580405	blue	Pav_sc0000017.1_g410.1.mk	0.630293	-0.629999	blue					Pav_sc0002835.1_g130.1.mk	0.864434	0.541834	turquoise
				Pav_sc0000910.1_g250.1.mk	0.864419	0.646824	turquoise	Pav_sc0000195.1_g190.1.mk	0.629441	-0.261506	blue	Pav_sc0000195.1_g190.1.mk	0.629441	-0.401305	blue					Pav_sc0000910.1_g250.1.mk	0.864419	0.571825	turquoise
				Pav_sc0000175.1_g030.1.mk	0.864292	0.625691	turquoise	novel.568	0.628849	-0.212766	blue	novel.568	0.628849	-0.36848	blue					Pav_sc0000175.1_g030.1.mk	0.864292	0.577318	turquoise
				Pav_sc0000352.1_g060.1.mk	0.863873	0.623777	turquoise	Pav_sc0000583.1_g810.1.mk	0.628396	-0.370605	blue	Pav_sc0000583.1_g810.1.mk	0.628396	-0.427621	blue					Pav_sc0000352.1_g060.1.mk	0.863873	0.573454	turquoise
				Pav_sc0000767.1_g100.1.br	0.863852	0.916838	turquoise	novel.873	-0.626702	0.445501	blue	novel.873	-0.626702	0.553741	blue					Pav_sc0000767.1_g100.1.br	0.863852	0.84134	turquoise
				Pav_sc0000299.1_g390.1.mk	0.863822	0.631222	turquoise	Pav_sc0003138.1_g230.1.mk	0.62509	-0.254513	blue	Pav_sc0003138.1_g230.1.mk	0.62509	-0.394407	blue					Pav_sc0000299.1_g390.1.mk	0.863822	0.576936	turquoise
				Pav_sc0000890.1_g480.1.mk	0.863092	0.621215	turquoise	novel.262	0.6245	-0.440447	blue	novel.262	0.6245	-0.488066	blue					Pav_sc0000890.1_g480.1.mk	0.863092	0.558889	turquoise
				Pav_sc0002250.1_g200.1.mk	0.863038	0.861526	turquoise	Pav_sc0000908.1_g270.1.mk	0.624407	-0.359423	blue	Pav_sc0000908.1_g270.1.mk	0.624407	-0.41983	blue					Pav_sc0002250.1_g200.1.mk	0.863038	0.769808	turquoise
				Pav_sc0000094.1_g580.1.mk	0.862932	0.895798	turquoise	Pav_sc0000323.1_g800.1.mk	-0.622338	0.270878	blue	Pav_sc0000323.1_g800.1.mk	-0.622338	0.434988	blue					Pav_sc0000094.1_g580.1.mk	0.862932	0.818644	turquoise
				novel.508	0.862813	0.712459	turquoise	Pav_sc0002772.1_g010.1.mk	0.620982	-0.692452	blue	Pav_sc0002772.1_g010.1.mk	0.620982	-0.679347	blue					novel.508	0.862813	0.630447	turquoise
				Pav_sc0001205.1_g400.1.mk	0.862561	0.750255	turquoise	Pav_sc0001911.1_g160.1.mk	0.619564	-0.443946	blue	Pav_sc0001911.1_g160.1.mk	0.619564	-0.548539	blue					Pav_sc0001205.1_g400.1.mk	0.862561	0.720852	turquoise
				Pav_sc0002360.1_g820.1.mk	0.862291	0.616183	turquoise	Pav_sc0001461.1_g720.1.mk	0.619296	-0.566318	blue	Pav_sc0001461.1_g720.1.mk	0.619296	-0.643447	blue					Pav_sc0002360.1_g820.1.mk	0.862291	0.547191	turquoise
				Pav_sc0000175.1_g560.1.mk	0.862186	0.874515	turquoise	Pav_sc0000195.1_g310.1.mk	0.618967	-0.42465	blue	Pav_sc0000195.1_g310.1.mk	0.618967	-0.517281	blue					Pav_sc0000175.1_g560.1.mk	0.862186	0.905568	turquoise
				Pav_sc0001540.1_g050.1.br	0.861958	0.77762	turquoise	Pav_sc0000108.1_g430.1.mk	0.616568	-0.404205	blue	Pav_sc0000108.1_g430.1.mk	0.616568	-0.480739	blue					Pav_sc0001540.1_g050.1.br	0.861958	0.701138	turquoise
				Pav_sc0000700.1_g600.1.mk	0.861864	0.873671	turquoise	Pav_sc0002722.1_g250.1.mk	0.615904	-0.494699	blue	Pav_sc0002722.1_g250.1.mk	0.615904	-0.597671	blue					Pav_sc0000700.1_g600.1.mk	0.861864	0.900061	turquoise
				Pav_sc0000702.1_g340.1.mk	0.861808	0.606659	turquoise	Pav_sc0000229.1_g330.1.mk	0.615561	-0.190319	blue	Pav_sc0000229.1_g330.1.mk	0.615561	-0.357416	blue					Pav_sc0000702.1_g340.1.mk	0.861808	0.534833	turquoise
				Pav_sc0000700.1_g830.1.mk	0.861657	0.950165	turquoise	Pav_sc0001205.1_g320.1.mk	0.610721	-0.491871	blue	Pav_sc0001205.1_g320.1.mk	0.610721	-0.547939	blue					Pav_sc0000700.1_g830.1.mk	0.861657	0.899903	turquoise
				Pav_sc0011764.1_g010.1.mk	0.861594	0.766666	turquoise	Pav_sc0000308.1_g120.1.br	0.609531	-0.468629	blue	Pav_sc0000308.1_g120.1.br	0.609531	-0.575077	blue					Pav_sc0011764.1_g010.1.mk	0.861594	0.662038	turquoise
				Pav_sc0001877.1_g040.1.mk	0.861567	0.66565	turquoise	Pav_sc0001699.1_g660.1.mk	0.60731	-0.285688	blue	Pav_sc0001699.1_g660.1.mk	0.60731	-0.418761	blue					Pav_sc0001877.1_g040.1.mk	0.861567	0.556619	turquoise
				Pav_sc0000704.1_g280.1.mk	-0.861485	-0.866434	turquoise	Pav_sc0000480.1_g980.1.br	0.605162	-0.372418	blue	Pav_sc0000480.1_g980.1.br	0.605162	-0.434175	blue					Pav_sc0000704.1_g280.1.mk	-0.861485	-0.853655	turquoise
				Pav_sc0001240.1_g030.1.mk	0.861294	0.907794	turquoise	Pav_sc0000852.1_g390.1.mk	0.603983	-0.225188	blue	Pav_sc0000852.1_g390.1.mk	0.603983	-0.356757	blue					Pav_sc0001240.1_g030.1.mk	0.861294	0.923069	turquoise
				Pav_sc0002722.1_g120.1.mk	0.861211	0.611143	turquoise	Pav_sc0000659.1_g170.1.mk	-0.603049	0.433067	blue	Pav_sc0000659.1_g170.1.mk	-0.603049	0.50796	blue					Pav_sc0002722.1_g120.1.mk	0.861211	0.548144	turquoise
				Pav_sc0000554.1_g1550.1.mk	0.861104	0.859342	turquoise	Pav_co4069733.1_g010.1.mk	0.602927	-0.407118	blue	Pav_co4069733.1_g010.1.mk	0.602927	-0.481791	blue					Pav_sc0000554.1_g1550.1.mk	0.861104	0.815355	turquoise
				Pav_sc0003832.1_g010.1.mk	0.861093	0.714009	turquoise	Pav_sc0004999.1_g050.1.mk	0.598993	-0.159391	blue	Pav_sc0004999.1_g050.1.mk	0.598993	-0.349237	blue					Pav_sc0003832.1_g010.1.mk	0.861093	0.70294	turquoise
				Pav_sc0000195.1_g090.1.mk	-0.86091	-0.809781	turquoise	Pav_sc0000144.1_g360.1.mk	0.598958	-0.343873	blue	Pav_sc0000144.1_g360.1.mk	0.598958	-0.430577	blue					Pav_sc0000195.1_g090.1.mk	-0.86091	-0.741832	turquoise
				Pav_sc0000087.1_g460.1.mk	0.860712	0.686157	turquoise	Pav_sc0000355.1_g090.1.mk	-0.595602	0.162116	blue	Pav_sc0000355.1_g090.1.mk	-0.595602	0.361636	blue					Pav_sc0000087.1_g460.1.mk	0.860712	0.592837	turquoise
				Pav_sc0000493.1_g120.1.mk	0.860563	0.786374	turquoise	Pav_sc0001465.1_g140.1.mk	0.594787	-0.285783	blue	Pav_sc0001465.1_g140.1.mk	0.594787	-0.409807	blue					Pav_sc0000493.1_g120.1.mk	0.860563	0.696575	turquoise
				Pav_sc0000026.1_g470.1.mk	0.860062	0.773856	turquoise	Pav_sc0001215.1_g180.1.mk	0.593257	-0.345307	blue	Pav_sc0001215.1_g180.1.mk	0.593257	-0.438125	blue					Pav_sc0000026.1_g470.1.mk	0.860062	0.657256	turquoise
				Pav_sc0000040.1_g1050.1.mk	0.860031	0.614138	turquoise	Pav_sc0008910.1_g010.1.mk	-0.59317	0.303131	blue	Pav_sc0008910.1_g010.1.mk	-0.59317	0.371441	blue					Pav_sc0000040.1_g1050.1.mk	0.860031	0.538056	turquoise
				Pav_sc0002234.1_g170.1.mk	0.859907	0.823576	turquoise	Pav_co4085467.1_g010.1.mk	0.589274	-0.558583	blue	Pav_co4085467.1_g010.1.mk	0.589274	-0.593012	blue					Pav_sc0002234.1_g170.1.mk	0.859907	0.7479	turquoise
				Pav_sc0001877.1_g150.1.br	0.859784	0.62163	turquoise	Pav_sc0001215.1_g370.1.mk	0.586731	-0.267174	blue	Pav_sc0001215.1_g370.1.mk	0.586731	-0.370783	blue					Pav_sc0001877.1_g150.1.br	0.859784	0.550355	turquoise
				Pav_sc0004354.1_g150.1.mk	0.85968	0.632788	turquoise	Pav_sc0000422.1_g080.1.mk	-0.586204	0.143063	blue	Pav_sc0000422.1_g080.1.mk	-0.586204	0.35323	blue					Pav_sc0004354.1_g150.1.mk	0.85968	0.568511	turquoise
				Pav_sc0000639.1_g180.1.mk	0.85934	0.621646	turquoise	Pav_sc0000638.1_g550.1.mk	-0.586139	0.429982	blue	Pav_sc0000638.1_g550.1.mk	-0.586139	0.440612	blue					Pav_sc0000639.1_g180.1.mk	0.85934	0.563809	turquoise
				Pav_sc0000261.1_g180.1.mk	-0.859187	-0.877925	turquoise	Pav_sc0000851.1_g050.1.br	-0.584999	0.529515	blue	Pav_sc0000851.1_g050.1.br	-0.584999	0.587966	blue					Pav_sc0000261.1_g180.1.mk	-0.859187	-0.852473	turquoise
				Pav_sc0001749.1_g180.1.mk	0.85908	0.66127	turquoise	Pav_sc0004547.1_g060.1.br	0.580539	-0.218902	blue	Pav_sc0004547.1_g060.1.br	0.580539	-0.329217	blue					Pav_sc0001749.1_g180.1.mk	0.85908	0.561918	turquoise
				Pav_sc0001272.1_g030.1.mk	0.858933	0.700091	turquoise	Pav_sc0003835.1_g220.1.mk	0.57847	-0.553263	blue	Pav_sc0003835.1_g220.1.mk	0.57847	-0.561036	blue					Pav_sc0001272.1_g030.1.mk	0.858933	0.597015	turquoise
				Pav_sc0002009.1_g170.1.mk	0.858849	0.941765	turquoise	Pav_sc0001502.1_g260.1.br	0.577619	-0.484056	blue	Pav_sc0001502.1_g260.1.br	0.577619	-0.572595	blue					Pav_sc0002009.1_g170.1.mk	0.858849	0.862962	turquoise
				novel.1160	0.858386	0.868226	turquoise	Pav_sc0001699.1_g680.1.mk	0.574358	-0.267508	blue	Pav_sc0001699.1_g680.1.mk	0.574358	-0.348529	blue					novel.1160	0.858386	0.747858	turquoise
				Pav_sc0000598.1_g010.1.br	0.858003	0.6703	turquoise	Pav_sc0000700.1_g350.1.mk	0.573264	-0.174939	blue	Pav_sc0000700.1_g350.1.mk	0.573264	-0.319751	blue					Pav_sc0000598.1_g010.1.br	0.858003	0.57878	turquoise
				Pav_sc0002445.1_g040.1.mk	0.85792	0.61532	turquoise	Pav_sc0000998.1_g290.1.mk	0.571657	-0.344223	blue	Pav_sc0000998.1_g290.1.mk	0.571657	-0.425686	blue					Pav_sc0002445.1_g040.1.mk	0.85792	0.549536	turquoise
				Pav_sc0000506.1_g090.1.mk	0.857592	0.749516	turquoise	Pav_sc0003802.1_g110.1.mk	0.570261	-0.351841	blue	Pav_sc0003802.1_g110.1.mk	0.570261	-0.446398	blue					Pav_sc0000506.1_g090.1.mk	0.857592	0.774989	turquoise
				Pav_sc0001909.1_g090.1.br	0.857261	0.901302	turquoise	Pav_sc0001687.1_g190.1.mk	0.569943	-0.431028	blue	Pav_sc0001687.1_g190.1.mk	0.569943	-0.528938	blue					Pav_sc0001909.1_g090.1.br	0.857261	0.797681	turquoise
				Pav_sc0000042.1_g570.1.mk	0.857066	0.636791	turquoise	Pav_sc0000130.1_g640.1.mk	0.56849	-0.138624	blue	Pav_sc0000130.1_g640.1.mk	0.56849	-0.325782	blue					Pav_sc0000042.1_g570.1.mk	0.857066	0.592972	turquoise
				Pav_sc0000065.1_g200.1.mk	0.856994	0.729962	turquoise	Pav_sc0000138.1_g450.1.mk	-0.567334	0.138974	blue	Pav_sc0000138.1_g450.1.mk	-0.567334	0.341557	blue					Pav_sc0000065.1_g200.1.mk	0.856994	0.625935	turquoise
				Pav_sc0000934.1_g020.1.br	0.85699	0.640715	turquoise	Pav_sc0002358.1_g020.1.mk	0.567207	-0.290659	blue	Pav_sc0002358.1_g020.1.mk	0.567207	-0.465937	blue					Pav_sc0000934.1_g020.1.br	0.85699	0.587771	turquoise
				Pav_sc0001485.1_g120.1.mk	0.856814	0.760554	turquoise	Pav_sc0002230.1_g030.1.mk	0.566396	-0.433412	blue	Pav_sc0002230.1_g030.1.mk	0.566396	-0.444985	blue					Pav_sc0001485.1_g120.1.mk	0.856814	0.760717	turquoise
				Pav_co3992447.1_g010.1.mk	0.856609	0.660971	turquoise	Pav_sc0000567.1_g060.1.mk	0.565487	-0.285832	blue	Pav_sc0000567.1_g060.1.mk	0.565487	-0.397426	blue					Pav_co3992447.1_g010.1.mk	0.856609	0.60799	turquoise
				Pav_sc0000624.1_g460.1.mk	0.85645	0.813759	turquoise	Pav_sc0000675.1_g880.1.br	0.561978	-0.531052	blue	Pav_sc0000675.1_g880.1.br	0.561978	-0.607688	blue					Pav_sc0000624.1_g460.1.mk	0.85645	0.737747	turquoise
				Pav_sc0001827.1_g130.1.mk	0.856071	0.751247	turquoise	novel.823	0.561905	-0.600882	blue	novel.823	0.561905	-0.62604	blue					Pav_sc0001827.1_g130.1.mk	0.856071	0.653866	turquoise
				Pav_sc0000299.1_g480.1.mk	0.855803	0.609374	turquoise	Pav_sc0000740.1_g420.1.mk	0.558305	-0.538447	blue	Pav_sc0000740.1_g420.1.mk	0.558305	-0.571716	blue					Pav_sc0000299.1_g480.1.mk	0.855803	0.528856	turquoise
				novel.604	0.855779	0.663968	turquoise	Pav_sc0006824.1_g010.1.mk	0.557909	-0.117206	blue	Pav_sc0006824.1_g010.1.mk	0.557909	-0.27406	blue					novel.604	0.855779	0.557671	turquoise
				Pav_sc0000113.1_g510.1.mk	0.855719	0.736834	turquoise	Pav_sc0000514.1_g160.1.br	0.557771	-0.302159	blue	Pav_sc0000514.1_g160.1.br	0.557771	-0.433399	blue					Pav_sc0000113.1_g510.1.mk	0.855719	0.750188	turquoise
				Pav_sc0000557.1_g240.1.mk	0.855601	0.771116	turquoise	Pav_sc0000558.1_g440.1.mk	0.555375	-0.237849	blue	Pav_sc0000558.1_g440.1.mk	0.555375	-0.40326	blue					Pav_sc0000557.1_g240.1.mk	0.855601	0.761305	turquoise
				Pav_sc0007674.1_g050.1.mk	0.855553	0.757501	turquoise	Pav_sc0002456.1_g180.1.mk	0.551606	-0.510737	blue	Pav_sc0002456.1_g180.1.mk	0.551606	-0.557779	blue					Pav_sc0007674.1_g050.1.mk	0.855553	0.787144	turquoise
				Pav_sc0000648.1_g050.1.mk	0.855322	0.806371	turquoise	Pav_sc0001309.1_g180.1.mk	0.550297	-0.412986	blue	Pav_sc0001309.1_g180.1.mk	0.550297	-0.456201	blue					Pav_sc0000648.1_g050.1.mk	0.855322	0.789669	turquoise
				Pav_sc0006080.1_g060.1.mk	0.855181	0.873765	turquoise	Pav_sc0008024.1_g020.1.br	0.547631	-0.175997	blue	Pav_sc0008024.1_g020.1.br	0.547631	-0.265241	blue					Pav_sc0006080.1_g060.1.mk	0.855181	0.863183	turquoise
				Pav_co4013265.1_g010.1.br	0.855094	0.637359	turquoise	Pav_sc0000983.1_g260.1.mk	-0.547399	0.29031	blue	Pav_sc0000983.1_g260.1.mk	-0.547399	0.352744	blue					Pav_co4013265.1_g010.1.br	0.855094	0.584732	turquoise
				Pav_sc0000254.1_g1120.1.mk	-0.855089	-0.868076	turquoise	Pav_sc0000100.1_g490.1.mk	0.545645	-0.284109	blue	Pav_sc0000100.1_g490.1.mk	0.545645	-0.396207	blue					Pav_sc0000254.1_g1120.1.mk	-0.855089	-0.855491	turquoise
				Pav_co4063581.1_g010.1.mk	0.855031	0.82936	turquoise	Pav_sc0002971.1_g010.1.mk	0.543435	-0.422417	blue	Pav_sc0002971.1_g010.1.mk	0.543435	-0.467569	blue					Pav_co4063581.1_g010.1.mk	0.855031	0.814096	turquoise
				Pav_sc0002360.1_g940.1.mk	0.854908	0.833507	turquoise	Pav_sc0000800.1_g840.1.mk	0.539427	-0.38301	blue	Pav_sc0000800.1_g840.1.mk	0.539427	-0.43241	blue					Pav_sc0002360.1_g940.1.mk	0.854908	0.808735	turquoise
				Pav_sc0000009.1_g410.1.mk	0.854235	0.664985	turquoise	Pav_sc0000362.1_g080.1.mk	0.535907	-0.269205	blue	Pav_sc0000362.1_g080.1.mk	0.535907	-0.385662	blue					Pav_sc0000009.1_g410.1.mk	0.854235	0.520544	turquoise
				Pav_sc0000212.1_g1190.1.mk	0.8542	0.689882	turquoise	Pav_sc0001275.1_g060.1.mk	0.534468	-0.32191	blue	Pav_sc0001275.1_g060.1.mk	0.534468	-0.391781	blue					Pav_sc0000212.1_g1190.1.mk	0.8542	0.628931	turquoise
				Pav_sc0004290.1_g090.1.mk	0.853588	0.623729	turquoise	Pav_sc0003169.1_g230.1.br	0.533309	-0.595641	blue	Pav_sc0003169.1_g230.1.br	0.533309	-0.609019	blue					Pav_sc0004290.1_g090.1.mk	0.853588	0.574452	turquoise
				Pav_sc0002648.1_g180.1.mk	0.853429	0.604475	turquoise	Pav_sc0000661.1_g470.1.mk	-0.530093	-0.025488	blue	Pav_sc0000661.1_g470.1.mk	-0.530093	0.135176	blue					Pav_sc0002648.1_g180.1.mk	0.853429	0.548021	turquoise
				Pav_sc0000653.1_g050.1.mk	0.853306	0.866925	turquoise	Pav_sc0000852.1_g1020.1.br	0.528089	-0.194636	blue	Pav_sc0000852.1_g1020.1.br	0.528089	-0.286779	blue					Pav_sc0000653.1_g050.1.mk	0.853306	0.837684	turquoise
				Pav_sc0000863.1_g420.1.mk	0.85329	0.616473	turquoise	Pav_sc0000589.1_g080.1.mk	-0.525083	0.293226	blue	Pav_sc0000589.1_g080.1.mk	-0.525083	0.407246	blue					Pav_sc0000863.1_g420.1.mk	0.85329	0.568484	turquoise
				Pav_sc0002327.1_g690.1.mk	0.852789	0.844486	turquoise	Pav_sc0000700.1_g1880.1.mk	0.523634	-0.372066	blue	Pav_sc0000700.1_g1880.1.mk	0.523634	-0.498413	blue					Pav_sc0002327.1_g690.1.mk	0.852789	0.808012	turquoise
				Pav_sc0005678.1_g120.1.mk	-0.8526	-0.891393	turquoise	Pav_sc0000412.1_g500.1.mk	-0.521691	0.122391	blue	Pav_sc0000412.1_g500.1.mk	-0.521691	0.309381	blue					Pav_sc0005678.1_g120.1.mk	-0.8526	-0.854002	turquoise
				Pav_sc0000363.1_g870.1.mk	-0.852481	-0.855188	turquoise	Pav_sc0000586.1_g190.1.mk	-0.517531	0.219794	blue	Pav_sc0000586.1_g190.1.mk	-0.517531	0.382998	blue					Pav_sc0000363.1_g870.1.mk	-0.852481	-0.828351	turquoise
				Pav_sc0000532.1_g080.1.mk	0.852474	0.697905	turquoise	Pav_sc0001695.1_g040.1.mk	-0.51569	0.043982	blue	Pav_sc0001695.1_g040.1.mk	-0.51569	0.178733	blue					Pav_sc0000532.1_g080.1.mk	0.852474	0.587239	turquoise
				Pav_sc0001479.1_g040.1.mk	0.852405	0.881453	turquoise	Pav_sc0000069.1_g560.1.br	-0.515056	0.437244	blue	Pav_sc0000069.1_g560.1.br	-0.515056	0.51149	blue					Pav_sc0001479.1_g040.1.mk	0.852405	0.855446	turquoise
				Pav_sc0000129.1_g1000.1.mk	0.852391	0.59876	turquoise	Pav_sc0001405.1_g1870.1.mk	0.513486	-0.43339	blue	Pav_sc0001405.1_g1870.1.mk	0.513486	-0.499497	blue					Pav_sc0000129.1_g1000.1.mk	0.852391	0.499271	turquoise
				Pav_sc0000955.1_g010.1.mk	0.852295	0.671383	turquoise	Pav_sc0002659.1_g130.1.br	-0.511886	0.082822	blue	Pav_sc0002659.1_g130.1.br	-0.511886	0.256272	blue					Pav_sc0000955.1_g010.1.mk	0.852295	0.596955	turquoise
				Pav_sc0002055.1_g050.1.mk	0.852224	0.689297	turquoise	Pav_sc0000229.1_g020.1.mk	0.506826	-0.306148	blue	Pav_sc0000229.1_g020.1.mk	0.506826	-0.353989	blue					Pav_sc0002055.1_g050.1.mk	0.852224	0.63451	turquoise
				Pav_sc0000065.1_g710.1.br	0.851939	0.889612	turquoise	Pav_sc0001341.1_g440.1.mk	-0.504873	0.147809	blue	Pav_sc0001341.1_g440.1.mk	-0.504873	0.319459	blue					Pav_sc0000065.1_g710.1.br	0.851939	0.851383	turquoise
				Pav_sc0001392.1_g520.1.mk	0.851829	0.665136	turquoise	Pav_sc0000624.1_g200.1.mk	0.49907	-0.4219	blue	Pav_sc0000624.1_g200.1.mk	0.49907	-0.412185	blue					Pav_sc0001392.1_g520.1.mk	0.851829	0.552485	turquoise
				Pav_sc0000907.1_g220.1.mk	-0.851717	-0.860086	turquoise	novel.74	0.495799	-0.451489	blue	novel.74	0.495799	-0.493146	blue					Pav_sc0000907.1_g220.1.mk	-0.851717	-0.847651	turquoise
				Pav_sc0000484.1_g710.1.mk	0.851671	0.656899	turquoise	Pav_sc0001671.1_g020.1.mk	-0.493858	0.316029	blue	Pav_sc0001671.1_g020.1.mk	-0.493858	0.392703	blue					Pav_sc0000484.1_g710.1.mk	0.851671	0.59463	turquoise
				Pav_sc0000175.1_g170.1.mk	-0.851629	-0.833548	turquoise	Pav_sc0001243.1_g550.1.mk	0.491222	-0.118282	blue	Pav_sc0001243.1_g550.1.mk	0.491222	-0.261721	blue					Pav_sc0000175.1_g170.1.mk	-0.851629	-0.795379	turquoise
				Pav_sc0000212.1_g810.1.mk	0.851331	0.637861	turquoise	Pav_sc0000829.1_g230.1.mk	-0.481702	0.127932	blue	Pav_sc0000829.1_g230.1.mk	-0.481702	0.298981	blue					Pav_sc0000212.1_g810.1.mk	0.851331	0.519563	turquoise
				Pav_sc0001309.1_g1180.1.mk	0.851283	0.888983	turquoise	Pav_sc0002659.1_g070.1.br	-0.480001	0.365541	blue	Pav_sc0002659.1_g070.1.br	-0.480001	0.441989	blue					Pav_sc0001309.1_g1180.1.mk	0.851283	0.923787	turquoise
				Pav_sc0000138.1_g770.1.mk	0.85128	0.608783	turquoise	Pav_sc0002493.1_g100.1.mk	0.472918	-0.388903	blue	Pav_sc0002493.1_g100.1.mk	0.472918	-0.425738	blue					Pav_sc0000138.1_g770.1.mk	0.85128	0.566112	turquoise
				novel.1397	0.851204	0.59338	turquoise	Pav_sc0004372.1_g040.1.br	0.466784	-0.277329	blue	Pav_sc0004372.1_g040.1.br	0.466784	-0.357841	blue					novel.1397	0.851204	0.531442	turquoise
				Pav_sc0000488.1_g630.1.mk	0.850706	0.840672	turquoise	Pav_sc0001872.1_g060.1.mk	0.466632	-0.0562563	blue	Pav_sc0001872.1_g060.1.mk	0.466632	-0.201427	blue					Pav_sc0000488.1_g630.1.mk	0.850706	0.854798	turquoise
				Pav_sc0000103.1_g1350.1.mk	0.850549	0.743211	turquoise	Pav_sc0000582.1_g030.1.mk	0.4624	-0.282181	blue	Pav_sc0000582.1_g030.1.mk	0.4624	-0.357882	blue					Pav_sc0000103.1_g1350.1.mk	0.850549	0.653044	turquoise
				Pav_sc0001280.1_g010.1.mk	0.850133	0.724544	turquoise	Pav_sc0000909.1_g240.1.mk	0.459962	-0.427083	blue	Pav_sc0000909.1_g240.1.mk	0.459962	-0.483504	blue					Pav_sc0001280.1_g010.1.mk	0.850133	0.613001	turquoise
				Pav_sc0000414.1_g010.1.mk	0.850085	0.770774	turquoise	Pav_sc0002842.1_g280.1.mk	0.458521	-0.339189	blue	Pav_sc0002842.1_g280.1.mk	0.458521	-0.380508	blue					Pav_sc0000414.1_g010.1.mk	0.850085	0.646006	turquoise
				Pav_sc0000367.1_g090.1.mk	-0.849755	-0.815002	turquoise	Pav_sc0001794.1_g250.1.mk	-0.458359	0.0123375	blue	Pav_sc0001794.1_g250.1.mk	-0.458359	0.223463	blue					Pav_sc0000367.1_g090.1.mk	-0.849755	-0.798377	turquoise
				Pav_sc0000465.1_g1070.1.mk	0.849728	0.89036	turquoise	Pav_sc0001801.1_g040.1.mk	0.454381	-0.271184	blue	Pav_sc0001801.1_g040.1.mk	0.454381	-0.32588	blue					Pav_sc0000465.1_g1070.1.mk	0.849728	0.826938	turquoise
				Pav_sc0004456.1_g070.1.mk	0.849569	0.786969	turquoise	Pav_sc0000257.1_g160.1.mk	0.453565	-0.37746	blue	Pav_sc0000257.1_g160.1.mk	0.453565	-0.378345	blue					Pav_sc0004456.1_g070.1.mk	0.849569	0.688758	turquoise
				Pav_sc0003582.1_g100.1.br	0.849324	0.640902	turquoise	Pav_sc0008903.1_g030.1.mk	0.44149	-0.172585	blue	Pav_sc0008903.1_g030.1.mk	0.44149	-0.270522	blue					Pav_sc0003582.1_g100.1.br	0.849324	0.567539	turquoise
				Pav_sc0004356.1_g050.1.mk	0.849267	0.881743	turquoise	Pav_sc0001623.1_g300.1.mk	-0.437829	-0.0164281	blue	Pav_sc0001623.1_g300.1.mk	-0.437829	0.139078	blue					Pav_sc0004356.1_g050.1.mk	0.849267	0.770594	turquoise
				Pav_sc0000102.1_g360.1.mk	0.849098	0.833065	turquoise	Pav_sc0005132.1_g010.1.mk	0.437647	-0.0893759	blue	Pav_sc0005132.1_g010.1.mk	0.437647	-0.223416	blue					Pav_sc0000102.1_g360.1.mk	0.849098	0.811564	turquoise
				Pav_sc0002348.1_g040.1.br	0.848808	0.621241	turquoise	Pav_sc0002375.1_g010.1.mk	0.436947	-0.213292	blue	Pav_sc0002375.1_g010.1.mk	0.436947	-0.302956	blue					Pav_sc0002348.1_g040.1.br	0.848808	0.542501	turquoise
				Pav_sc0000600.1_g380.1.mk	-0.848623	-0.897047	turquoise	Pav_sc0002444.1_g040.1.mk	-0.430195	0.142873	blue	Pav_sc0002444.1_g040.1.mk	-0.430195	0.202208	blue					Pav_sc0000600.1_g380.1.mk	-0.848623	-0.830743	turquoise
				Pav_sc0000373.1_g720.1.mk	0.848176	0.792034	turquoise	Pav_sc0000909.1_g530.1.mk	0.427576	-0.422795	blue	Pav_sc0000909.1_g530.1.mk	0.427576	-0.459958	blue					Pav_sc0000373.1_g720.1.mk	0.848176	0.715894	turquoise
				Pav_sc0001710.1_g360.1.mk	0.848082	0.903742	turquoise	Pav_sc0000583.1_g350.1.br	0.425897	-0.167709	blue	Pav_sc0000583.1_g350.1.br	0.425897	-0.255408	blue					Pav_sc0001710.1_g360.1.mk	0.848082	0.891638	turquoise
				Pav_sc0012645.1_g030.1.mk	0.848076	0.690683	turquoise	Pav_sc0001369.1_g230.1.mk	0.424044	-0.31341	blue	Pav_sc0001369.1_g230.1.mk	0.424044	-0.377989	blue					Pav_sc0012645.1_g030.1.mk	0.848076	0.58826	turquoise
				Pav_sc0001543.1_g310.1.br	0.847998	0.589696	turquoise	Pav_sc0000890.1_g1120.1.mk	0.423397	-0.34796	blue	Pav_sc0000890.1_g1120.1.mk	0.423397	-0.370429	blue					Pav_sc0001543.1_g310.1.br	0.847998	0.52339	turquoise
				Pav_sc0001938.1_g600.1.mk	0.847351	0.887096	turquoise	Pav_sc0000403.1_g100.1.br	0.422349	-0.421653	blue	Pav_sc0000403.1_g100.1.br	0.422349	-0.44096	blue					Pav_sc0001938.1_g600.1.mk	0.847351	0.805766	turquoise
				Pav_sc0000732.1_g070.1.mk	0.847312	0.656585	turquoise	Pav_sc0005707.1_g020.1.br	0.415375	-0.182024	blue	Pav_sc0005707.1_g020.1.br	0.415375	-0.23982	blue					Pav_sc0000732.1_g070.1.mk	0.847312	0.59942	turquoise
				Pav_sc0001015.1_g040.1.mk	0.847164	0.635976	turquoise	Pav_sc0001392.1_g550.1.mk	-0.414389	0.280313	blue	Pav_sc0001392.1_g550.1.mk	-0.414389	0.344007	blue					Pav_sc0001015.1_g040.1.mk	0.847164	0.547032	turquoise
				Pav_sc0001900.1_g300.1.mk	0.846713	0.692575	turquoise	Pav_sc0002181.1_g360.1.br	-0.407037	0.335219	blue	Pav_sc0002181.1_g360.1.br	-0.407037	0.427193	blue					Pav_sc0001900.1_g300.1.mk	0.846713	0.644249	turquoise
				Pav_sc0000229.1_g170.1.mk	-0.846421	-0.762592	turquoise	Pav_sc0003804.1_g010.1.br	0.400205	-0.179337	blue	Pav_sc0003804.1_g010.1.br	0.400205	-0.238974	blue					Pav_sc0000229.1_g170.1.mk	-0.846421	-0.678701	turquoise
				novel.1279	0.846222	0.601146	turquoise	Pav_sc0000212.1_g1900.1.mk	0.399741	0.0262472	blue	Pav_sc0000212.1_g1900.1.mk	0.399741	-0.115463	blue					novel.1279	0.846222	0.557006	turquoise
				Pav_co3994523.1_g010.1.mk	0.84584	0.619287	turquoise	Pav_sc0000909.1_g610.1.br	0.389721	-0.251736	blue	Pav_sc0000909.1_g610.1.br	0.389721	-0.273103	blue					Pav_co3994523.1_g010.1.mk	0.84584	0.580881	turquoise
				Pav_sc0000464.1_g540.1.mk	-0.845821	-0.911786	turquoise	Pav_sc0002842.1_g230.1.mk	0.383869	-0.37973	blue	Pav_sc0002842.1_g230.1.mk	0.383869	-0.382348	blue					Pav_sc0000464.1_g540.1.mk	-0.845821	-0.903165	turquoise
				Pav_sc0000691.1_g680.1.mk	0.845745	0.774564	turquoise	Pav_sc0000752.1_g140.1.br	0.380806	0.0700987	blue	Pav_sc0000752.1_g140.1.br	0.380806	-0.0882401	blue					Pav_sc0000691.1_g680.1.mk	0.845745	0.730655	turquoise
				Pav_sc0000549.1_g1000.1.mk	-0.845674	-0.888889	turquoise	Pav_sc0004655.1_g010.1.br	0.370693	-0.227993	blue	Pav_sc0004655.1_g010.1.br	0.370693	-0.324369	blue					Pav_sc0000549.1_g1000.1.mk	-0.845674	-0.899053	turquoise
				Pav_sc0000553.1_g400.1.mk	0.845522	0.897999	turquoise	Pav_sc0001109.1_g030.1.mk	0.368322	-0.0707094	blue	Pav_sc0001109.1_g030.1.mk	0.368322	-0.195854	blue					Pav_sc0000553.1_g400.1.mk	0.845522	0.91972	turquoise
				Pav_sc0001323.1_g1000.1.mk	-0.845124	-0.89485	turquoise	Pav_sc0001236.1_g130.1.mk	-0.3639	0.0279663	blue	Pav_sc0001236.1_g130.1.mk	-0.3639	0.178842	blue					Pav_sc0001323.1_g1000.1.mk	-0.845124	-0.905158	turquoise
				Pav_sc0004305.1_g290.1.mk	0.844799	0.580382	turquoise	Pav_sc0000405.1_g380.1.mk	0.362192	-0.194082	blue	Pav_sc0000405.1_g380.1.mk	0.362192	-0.258843	blue					Pav_sc0004305.1_g290.1.mk	0.844799	0.496875	turquoise
				Pav_sc0004766.1_g040.1.mk	-0.844537	-0.850002	turquoise	Pav_sc0001102.1_g910.1.br	-0.35988	0.326662	blue	Pav_sc0001102.1_g910.1.br	-0.35988	0.367175	blue					Pav_sc0004766.1_g040.1.mk	-0.844537	-0.825059	turquoise
				Pav_sc0001877.1_g160.1.mk	0.844389	0.755841	turquoise	Pav_sc0001461.1_g710.1.mk	0.3553	-0.122912	blue	Pav_sc0001461.1_g710.1.mk	0.3553	-0.262072	blue					Pav_sc0001877.1_g160.1.mk	0.844389	0.671006	turquoise
				Pav_sc0003823.1_g260.1.mk	0.844315	0.893415	turquoise	Pav_sc0008045.1_g040.1.mk	-0.353075	0.0366397	blue	Pav_sc0008045.1_g040.1.mk	-0.353075	0.156969	blue					Pav_sc0003823.1_g260.1.mk	0.844315	0.896119	turquoise
				Pav_sc0001309.1_g190.1.mk	-0.844016	-0.84876	turquoise	Pav_sc0002053.1_g120.1.mk	0.349921	-0.0658402	blue	Pav_sc0002053.1_g120.1.mk	0.349921	-0.229582	blue					Pav_sc0001309.1_g190.1.mk	-0.844016	-0.829384	turquoise
				Pav_sc0000359.1_g550.1.mk	0.843904	0.837718	turquoise	Pav_sc0000861.1_g130.1.mk	0.348495	-0.284374	blue	Pav_sc0000861.1_g130.1.mk	0.348495	-0.334176	blue					Pav_sc0000359.1_g550.1.mk	0.843904	0.878174	turquoise
				novel.602	0.843384	0.735166	turquoise	Pav_sc0000030.1_g1340.1.mk	0.346083	-0.336364	blue	Pav_sc0000030.1_g1340.1.mk	0.346083	-0.3916	blue					novel.602	0.843384	0.609744	turquoise
				Pav_sc0000567.1_g260.1.mk	0.843327	0.813903	turquoise	Pav_sc0000600.1_g590.1.mk	0.338949	-0.194987	blue	Pav_sc0000600.1_g590.1.mk	0.338949	-0.228156	blue					Pav_sc0000567.1_g260.1.mk	0.843327	0.844644	turquoise
				Pav_sc0000877.1_g1910.1.mk	0.843172	0.604712	turquoise	Pav_sc0000311.1_g370.1.mk	0.331455	-0.241406	blue	Pav_sc0000311.1_g370.1.mk	0.331455	-0.266371	blue					Pav_sc0000877.1_g1910.1.mk	0.843172	0.492242	turquoise
				Pav_sc0000759.1_g050.1.mk	0.843108	0.90064	turquoise	Pav_sc0000440.1_g100.1.mk	0.325279	-0.252023	blue	Pav_sc0000440.1_g100.1.mk	0.325279	-0.291261	blue					Pav_sc0000759.1_g050.1.mk	0.843108	0.914954	turquoise
				Pav_sc0003279.1_g030.1.mk	0.842811	0.820358	turquoise	Pav_sc0002403.1_g070.1.mk	-0.318994	0.139933	blue	Pav_sc0002403.1_g070.1.mk	-0.318994	0.246767	blue					Pav_sc0003279.1_g030.1.mk	0.842811	0.744467	turquoise
				Pav_sc0000119.1_g660.1.mk	-0.842795	-0.83201	turquoise	Pav_sc0000254.1_g420.1.mk	0.317575	-0.313889	blue	Pav_sc0000254.1_g420.1.mk	0.317575	-0.332679	blue					Pav_sc0000119.1_g660.1.mk	-0.842795	-0.845773	turquoise
				Pav_sc0002628.1_g060.1.mk	0.842361	0.604164	turquoise	Pav_sc0001124.1_g080.1.mk	-0.298005	0.171052	blue	Pav_sc0001124.1_g080.1.mk	-0.298005	0.236635	blue					Pav_sc0002628.1_g060.1.mk	0.842361	0.504415	turquoise
				novel.1263	-0.842334	-0.783212	turquoise	Pav_sc0000852.1_g1110.1.mk	0.29549	-0.120649	blue	Pav_sc0000852.1_g1110.1.mk	0.29549	-0.207528	blue					novel.1263	-0.842334	-0.702814	turquoise
				Pav_sc0000069.1_g160.1.mk	0.842164	0.596992	turquoise	Pav_sc0000419.1_g100.1.mk	0.285035	-0.125225	blue	Pav_sc0000419.1_g100.1.mk	0.285035	-0.20824	blue					Pav_sc0000069.1_g160.1.mk	0.842164	0.529225	turquoise
				Pav_sc0000910.1_g530.1.mk	-0.841709	-0.847756	turquoise	Pav_sc0002607.1_g210.1.mk	-0.27922	0.157134	blue	Pav_sc0002607.1_g210.1.mk	-0.27922	0.206238	blue					Pav_sc0000910.1_g530.1.mk	-0.841709	-0.797107	turquoise
				Pav_sc0001807.1_g160.1.mk	0.841504	0.725373	turquoise	Pav_sc0000890.1_g660.1.mk	-0.273805	0.293204	blue	Pav_sc0000890.1_g660.1.mk	-0.273805	0.310879	blue					Pav_sc0001807.1_g160.1.mk	0.841504	0.716662	turquoise
				Pav_sc0000704.1_g1040.1.mk	0.841246	0.888768	turquoise	Pav_sc0004655.1_g020.1.br	0.262427	-0.186841	blue	Pav_sc0004655.1_g020.1.br	0.262427	-0.239996	blue					Pav_sc0000704.1_g1040.1.mk	0.841246	0.909508	turquoise
				Pav_sc0006896.1_g030.1.mk	0.841206	0.655511	turquoise	Pav_sc0005070.1_g030.1.mk	0.248899	0.0603479	blue	Pav_sc0005070.1_g030.1.mk	0.248899	-0.00429811	blue					Pav_sc0006896.1_g030.1.mk	0.841206	0.546265	turquoise
				Pav_sc0000620.1_g050.1.mk	0.84115	0.760414	turquoise	Pav_sc0000567.1_g1140.1.mk	-0.22771	-0.0924347	blue	Pav_sc0000567.1_g1140.1.mk	-0.22771	0.0139708	blue					Pav_sc0000620.1_g050.1.mk	0.84115	0.607717	turquoise
				Pav_co3991605.1_g010.1.mk	0.841016	0.801702	turquoise	Pav_sc0000671.1_g010.1.mk	0.181096	-0.121107	blue	Pav_sc0000671.1_g010.1.mk	0.181096	-0.127391	blue					Pav_co3991605.1_g010.1.mk	0.841016	0.725199	turquoise
				Pav_sc0000813.1_g230.1.br	0.841015	0.647559	turquoise	Pav_sc0006359.1_g070.1.mk	0.165472	-0.100712	blue	Pav_sc0006359.1_g070.1.mk	0.165472	-0.104042	blue					Pav_sc0000813.1_g230.1.br	0.841015	0.599427	turquoise
				Pav_sc0001580.1_g140.1.mk	0.840662	0.776266	turquoise	Pav_sc0000800.1_g670.1.mk	0.157729	0.0261664	blue	Pav_sc0000800.1_g670.1.mk	0.157729	-0.0128122	blue					Pav_sc0001580.1_g140.1.mk	0.840662	0.693424	turquoise
				Pav_sc0000143.1_g800.1.mk	0.840552	0.74187	turquoise													Pav_sc0000143.1_g800.1.mk	0.840552	0.647245	turquoise
				Pav_sc0000700.1_g1300.1.mk	0.840316	0.933788	turquoise													Pav_sc0000700.1_g1300.1.mk	0.840316	0.901393	turquoise
				Pav_sc0000747.1_g100.1.mk	0.839921	0.67494	turquoise													Pav_sc0000747.1_g100.1.mk	0.839921	0.585281	turquoise
				Pav_sc0000744.1_g440.1.mk	0.839844	0.58403	turquoise													Pav_sc0000744.1_g440.1.mk	0.839844	0.521294	turquoise
				novel.253	0.839348	0.583504	turquoise													novel.253	0.839348	0.520541	turquoise
				Pav_sc0001309.1_g1280.1.mk	0.838836	0.869579	turquoise													Pav_sc0001309.1_g1280.1.mk	0.838836	0.912366	turquoise
				Pav_sc0000304.1_g160.1.mk	0.83882	0.704306	turquoise													Pav_sc0000304.1_g160.1.mk	0.83882	0.618121	turquoise
				Pav_sc0002451.1_g070.1.mk	0.838302	0.603182	turquoise													Pav_sc0002451.1_g070.1.mk	0.838302	0.546161	turquoise
				Pav_sc0000852.1_g520.1.mk	0.838278	0.752255	turquoise													Pav_sc0000852.1_g520.1.mk	0.838278	0.65481	turquoise
				Pav_sc0002988.1_g030.1.br	0.838128	0.857084	turquoise													Pav_sc0002988.1_g030.1.br	0.838128	0.820388	turquoise
				Pav_sc0001900.1_g290.1.mk	0.837855	0.727818	turquoise													Pav_sc0001900.1_g290.1.mk	0.837855	0.570181	turquoise
				Pav_sc0000308.1_g460.1.mk	0.837816	0.595687	turquoise													Pav_sc0000308.1_g460.1.mk	0.837816	0.552187	turquoise
				Pav_sc0000370.1_g800.1.mk	-0.837786	-0.842014	turquoise													Pav_sc0000370.1_g800.1.mk	-0.837786	-0.844615	turquoise
				Pav_sc0000661.1_g240.1.mk	0.837734	0.808163	turquoise													Pav_sc0000661.1_g240.1.mk	0.837734	0.843068	turquoise
				Pav_sc0001059.1_g360.1.mk	0.83763	0.895211	turquoise													Pav_sc0001059.1_g360.1.mk	0.83763	0.88949	turquoise
				Pav_sc0001126.1_g340.1.mk	0.837404	0.707562	turquoise													Pav_sc0001126.1_g340.1.mk	0.837404	0.63702	turquoise
				Pav_sc0000367.1_g330.1.mk	0.837371	0.849617	turquoise													Pav_sc0000367.1_g330.1.mk	0.837371	0.871867	turquoise
				Pav_sc0000852.1_g470.1.mk	0.837333	0.595711	turquoise													Pav_sc0000852.1_g470.1.mk	0.837333	0.495067	turquoise
				Pav_sc0000323.1_g320.1.mk	0.837208	0.812509	turquoise													Pav_sc0000323.1_g320.1.mk	0.837208	0.820052	turquoise
				Pav_sc0001392.1_g560.1.mk	0.836847	0.905435	turquoise													Pav_sc0001392.1_g560.1.mk	0.836847	0.829765	turquoise
				Pav_sc0000554.1_g040.1.br	0.836839	0.768055	turquoise													Pav_sc0000554.1_g040.1.br	0.836839	0.615114	turquoise
				Pav_sc0005664.1_g130.1.mk	0.836767	0.95405	turquoise													Pav_sc0005664.1_g130.1.mk	0.836767	0.894756	turquoise
				Pav_sc0000412.1_g180.1.mk	-0.836733	-0.860501	turquoise													Pav_sc0000412.1_g180.1.mk	-0.836733	-0.870766	turquoise
				Pav_sc0001502.1_g490.1.mk	0.83642	0.639453	turquoise													Pav_sc0001502.1_g490.1.mk	0.83642	0.597362	turquoise
				Pav_sc0012008.1_g010.1.mk	0.836328	0.858229	turquoise													Pav_sc0012008.1_g010.1.mk	0.836328	0.775967	turquoise
				Pav_sc0000099.1_g700.1.mk	0.835954	0.856668	turquoise													Pav_sc0000099.1_g700.1.mk	0.835954	0.771045	turquoise
				Pav_sc0000491.1_g1090.1.mk	0.83562	0.896086	turquoise													Pav_sc0000491.1_g1090.1.mk	0.83562	0.829016	turquoise
				Pav_sc0000146.1_g330.1.mk	0.835618	0.884408	turquoise													Pav_sc0000146.1_g330.1.mk	0.835618	0.914149	turquoise
				Pav_sc0000845.1_g260.1.mk	0.835453	0.92572	turquoise													Pav_sc0000845.1_g260.1.mk	0.835453	0.923522	turquoise
				Pav_sc0001106.1_g360.1.mk	0.835352	0.920153	turquoise													Pav_sc0001106.1_g360.1.mk	0.835352	0.911265	turquoise
				Pav_sc0001710.1_g300.1.mk	0.835297	0.911205	turquoise													Pav_sc0001710.1_g300.1.mk	0.835297	0.872375	turquoise
				Pav_sc0000052.1_g750.1.mk	0.835262	0.924397	turquoise													Pav_sc0000052.1_g750.1.mk	0.835262	0.877598	turquoise
				Pav_sc0000395.1_g040.1.mk	0.83518	0.60025	turquoise													Pav_sc0000395.1_g040.1.mk	0.83518	0.527665	turquoise
				Pav_sc0000540.1_g300.1.mk	0.834742	0.684181	turquoise													Pav_sc0000540.1_g300.1.mk	0.834742	0.639137	turquoise
				Pav_sc0001701.1_g020.1.mk	0.834284	0.947089	turquoise													Pav_sc0001701.1_g020.1.mk	0.834284	0.861383	turquoise
				Pav_sc0001710.1_g750.1.mk	0.834193	0.77002	turquoise													Pav_sc0001710.1_g750.1.mk	0.834193	0.79566	turquoise
				Pav_sc0000700.1_g680.1.mk	0.834125	0.768439	turquoise													Pav_sc0000700.1_g680.1.mk	0.834125	0.717726	turquoise
				novel.344	0.833436	0.880012	turquoise													novel.344	0.833436	0.903424	turquoise
				Pav_sc0005509.1_g110.1.mk	0.833356	0.873327	turquoise													Pav_sc0005509.1_g110.1.mk	0.833356	0.902331	turquoise
				Pav_sc0006257.1_g030.1.mk	0.833242	0.571694	turquoise													Pav_sc0006257.1_g030.1.mk	0.833242	0.510191	turquoise
				Pav_sc0002608.1_g090.1.mk	0.832998	0.575174	turquoise													Pav_sc0002608.1_g090.1.mk	0.832998	0.510086	turquoise
				Pav_sc0000890.1_g1490.1.mk	0.832937	0.572199	turquoise													Pav_sc0000890.1_g1490.1.mk	0.832937	0.507147	turquoise
				Pav_sc0006188.1_g050.1.mk	0.832929	0.835409	turquoise													Pav_sc0006188.1_g050.1.mk	0.832929	0.812862	turquoise
				Pav_sc0003135.1_g600.1.mk	-0.832902	-0.841148	turquoise													Pav_sc0003135.1_g600.1.mk	-0.832902	-0.830048	turquoise
				Pav_sc0000751.1_g130.1.mk	0.83286	0.568712	turquoise													Pav_sc0000751.1_g130.1.mk	0.83286	0.49165	turquoise
				Pav_sc0000625.1_g330.1.mk	-0.832756	-0.905868	turquoise													Pav_sc0000625.1_g330.1.mk	-0.832756	-0.943561	turquoise
				Pav_sc0000996.1_g110.1.mk	0.832635	0.765482	turquoise													Pav_sc0000996.1_g110.1.mk	0.832635	0.812257	turquoise
				Pav_sc0000351.1_g550.1.mk	0.83262	0.801461	turquoise													Pav_sc0000351.1_g550.1.mk	0.83262	0.798354	turquoise
				Pav_co4025945.1_g010.1.mk	0.832176	0.596374	turquoise													Pav_co4025945.1_g010.1.mk	0.832176	0.541219	turquoise
				Pav_sc0000112.1_g140.1.mk	-0.832144	-0.844126	turquoise													Pav_sc0000112.1_g140.1.mk	-0.832144	-0.838408	turquoise
				Pav_sc0000130.1_g530.1.mk	0.832108	0.845443	turquoise													Pav_sc0000130.1_g530.1.mk	0.832108	0.866175	turquoise
				Pav_sc0000054.1_g210.1.mk	0.832108	0.737798	turquoise													Pav_sc0000054.1_g210.1.mk	0.832108	0.685925	turquoise
				Pav_sc0000352.1_g140.1.mk	0.83142	0.918348	turquoise													Pav_sc0000352.1_g140.1.mk	0.83142	0.88393	turquoise
				Pav_sc0002327.1_g580.1.mk	0.83124	0.919513	turquoise													Pav_sc0002327.1_g580.1.mk	0.83124	0.846496	turquoise
				Pav_sc0000378.1_g010.1.mk	0.831152	0.835086	turquoise													Pav_sc0000378.1_g010.1.mk	0.831152	0.902834	turquoise
				Pav_sc0000349.1_g250.1.mk	0.829511	0.775175	turquoise													Pav_sc0000349.1_g250.1.mk	0.829511	0.782039	turquoise
				Pav_sc0000755.1_g070.1.mk	0.829455	0.590078	turquoise													Pav_sc0000755.1_g070.1.mk	0.829455	0.489516	turquoise
				Pav_sc0001503.1_g220.1.mk	0.829429	0.77676	turquoise													Pav_sc0001503.1_g220.1.mk	0.829429	0.638916	turquoise
				Pav_sc0001217.1_g200.1.mk	0.829132	0.874339	turquoise													Pav_sc0001217.1_g200.1.mk	0.829132	0.792746	turquoise
				Pav_sc0001341.1_g090.1.mk	0.829118	0.598608	turquoise													Pav_sc0001341.1_g090.1.mk	0.829118	0.552361	turquoise
				Pav_sc0003682.1_g110.1.br	0.828954	0.821445	turquoise													Pav_sc0003682.1_g110.1.br	0.828954	0.779632	turquoise
				Pav_sc0000138.1_g080.1.mk	0.828467	0.943011	turquoise													Pav_sc0000138.1_g080.1.mk	0.828467	0.933095	turquoise
				Pav_sc0000370.1_g820.1.mk	0.82837	0.639673	turquoise													Pav_sc0000370.1_g820.1.mk	0.82837	0.526354	turquoise
				Pav_sc0001739.1_g030.1.mk	0.828323	0.850343	turquoise													Pav_sc0001739.1_g030.1.mk	0.828323	0.883218	turquoise
				Pav_sc0002136.1_g080.1.mk	-0.827972	-0.829571	turquoise													Pav_sc0002136.1_g080.1.mk	-0.827972	-0.826759	turquoise
				Pav_sc0001060.1_g140.1.mk	0.827945	0.580792	turquoise													Pav_sc0001060.1_g140.1.mk	0.827945	0.537392	turquoise
				Pav_sc0000598.1_g330.1.mk	0.827625	0.590897	turquoise													Pav_sc0000598.1_g330.1.mk	0.827625	0.522678	turquoise
				Pav_sc0001196.1_g1730.1.mk	-0.827491	-0.848045	turquoise													Pav_sc0001196.1_g1730.1.mk	-0.827491	-0.870004	turquoise
				Pav_sc0000359.1_g100.1.mk	0.827414	0.769452	turquoise													Pav_sc0000359.1_g100.1.mk	0.827414	0.681703	turquoise
				Pav_sc0000852.1_g620.1.mk	0.827261	0.574401	turquoise													Pav_sc0000852.1_g620.1.mk	0.827261	0.513851	turquoise
				Pav_sc0000129.1_g970.1.mk	0.827204	0.623852	turquoise													Pav_sc0000129.1_g970.1.mk	0.827204	0.548181	turquoise
				Pav_sc0000669.1_g040.1.br	0.82716	0.566792	turquoise													Pav_sc0000669.1_g040.1.br	0.82716	0.492757	turquoise
				Pav_sc0001191.1_g240.1.mk	0.827117	0.874588	turquoise													Pav_sc0001191.1_g240.1.mk	0.827117	0.784618	turquoise
				Pav_sc0001280.1_g440.1.mk	-0.827	-0.853502	turquoise													Pav_sc0001280.1_g440.1.mk	-0.827	-0.833551	turquoise
				Pav_sc0000030.1_g540.1.br	0.826987	0.856806	turquoise													Pav_sc0000030.1_g540.1.br	0.826987	0.779161	turquoise
				Pav_sc0000085.1_g180.1.mk	0.826835	0.57293	turquoise													Pav_sc0000085.1_g180.1.mk	0.826835	0.510747	turquoise
				Pav_sc0001181.1_g340.1.mk	0.826714	0.682118	turquoise													Pav_sc0001181.1_g340.1.mk	0.826714	0.594479	turquoise
				Pav_sc0012332.1_g010.1.br	0.826382	0.64086	turquoise													Pav_sc0012332.1_g010.1.br	0.826382	0.591243	turquoise
				Pav_sc0000195.1_g1070.1.mk	0.826058	0.567019	turquoise													Pav_sc0000195.1_g1070.1.mk	0.826058	0.514748	turquoise
				Pav_sc0000184.1_g320.1.mk	0.825403	0.629366	turquoise													Pav_sc0000184.1_g320.1.mk	0.825403	0.500504	turquoise
				Pav_sc0002264.1_g050.1.br	0.82529	0.614758	turquoise													Pav_sc0002264.1_g050.1.br	0.82529	0.524327	turquoise
				Pav_sc0000691.1_g830.1.mk	0.824961	0.671341	turquoise													Pav_sc0000691.1_g830.1.mk	0.824961	0.566172	turquoise
				Pav_sc0000015.1_g210.1.mk	0.824961	0.569311	turquoise													Pav_sc0000015.1_g210.1.mk	0.824961	0.470656	turquoise
				Pav_sc0000908.1_g130.1.mk	0.82463	0.911898	turquoise													Pav_sc0000908.1_g130.1.mk	0.82463	0.892311	turquoise
				Pav_sc0002449.1_g060.1.mk	0.82441	0.649006	turquoise													Pav_sc0002449.1_g060.1.mk	0.82441	0.482535	turquoise
				Pav_sc0000146.1_g560.1.mk	0.824358	0.875128	turquoise													Pav_sc0000146.1_g560.1.mk	0.824358	0.834019	turquoise
				Pav_sc0001807.1_g070.1.mk	0.824239	0.931674	turquoise													Pav_sc0001807.1_g070.1.mk	0.824239	0.833268	turquoise
				Pav_sc0001938.1_g500.1.mk	0.824154	0.82041	turquoise													Pav_sc0001938.1_g500.1.mk	0.824154	0.720079	turquoise
				Pav_sc0000015.1_g120.1.mk	0.82374	0.903116	turquoise													Pav_sc0000015.1_g120.1.mk	0.82374	0.914558	turquoise
				Pav_sc0000206.1_g550.1.mk	0.823734	0.854346	turquoise													Pav_sc0000206.1_g550.1.mk	0.823734	0.884779	turquoise
				Pav_sc0001749.1_g150.1.mk	0.823713	0.816907	turquoise													Pav_sc0001749.1_g150.1.mk	0.823713	0.855033	turquoise
				Pav_sc0002250.1_g170.1.mk	0.823607	0.874553	turquoise													Pav_sc0002250.1_g170.1.mk	0.823607	0.841981	turquoise
				Pav_sc0000414.1_g170.1.mk	0.823136	0.740978	turquoise													Pav_sc0000414.1_g170.1.mk	0.823136	0.690609	turquoise
				Pav_sc0002974.1_g150.1.br	0.82311	0.573451	turquoise													Pav_sc0002974.1_g150.1.br	0.82311	0.51617	turquoise
				Pav_sc0002176.1_g150.1.mk	0.823052	0.5629	turquoise													Pav_sc0002176.1_g150.1.mk	0.823052	0.497323	turquoise
				Pav_sc0002360.1_g400.1.mk	0.822541	0.830788	turquoise													Pav_sc0002360.1_g400.1.mk	0.822541	0.891511	turquoise
				Pav_sc0000893.1_g420.1.mk	0.822208	0.750855	turquoise													Pav_sc0000893.1_g420.1.mk	0.822208	0.793775	turquoise
				Pav_sc0000323.1_g500.1.mk	0.822109	0.559143	turquoise													Pav_sc0000323.1_g500.1.mk	0.822109	0.496245	turquoise
				Pav_sc0000638.1_g510.1.mk	0.822072	0.938591	turquoise													Pav_sc0000638.1_g510.1.mk	0.822072	0.896012	turquoise
				Pav_sc0002608.1_g010.1.mk	0.822054	0.568037	turquoise													Pav_sc0002608.1_g010.1.mk	0.822054	0.505399	turquoise
				Pav_co4015637.1_g010.1.mk	0.822011	0.853696	turquoise													Pav_co4015637.1_g010.1.mk	0.822011	0.848826	turquoise
				Pav_sc0000893.1_g500.1.mk	0.821888	0.820938	turquoise													Pav_sc0000893.1_g500.1.mk	0.821888	0.771871	turquoise
				Pav_sc0000174.1_g1370.1.mk	0.821845	0.812348	turquoise													Pav_sc0000174.1_g1370.1.mk	0.821845	0.871646	turquoise
				Pav_sc0000129.1_g670.1.br	0.821786	0.559965	turquoise													Pav_sc0000129.1_g670.1.br	0.821786	0.481533	turquoise
				Pav_sc0000756.1_g020.1.mk	-0.821703	-0.775852	turquoise													Pav_sc0000756.1_g020.1.mk	-0.821703	-0.726764	turquoise
				Pav_sc0003267.1_g020.1.mk	0.821642	0.647281	turquoise													Pav_sc0003267.1_g020.1.mk	0.821642	0.526359	turquoise
				Pav_sc0002183.1_g030.1.mk	0.821595	0.566774	turquoise													Pav_sc0002183.1_g030.1.mk	0.821595	0.491784	turquoise
				novel.487	0.821288	0.565291	turquoise													novel.487	0.821288	0.511942	turquoise
				Pav_sc0000681.1_g020.1.br	0.821068	0.898918	turquoise													Pav_sc0000681.1_g020.1.br	0.821068	0.792604	turquoise
				Pav_sc0001196.1_g1250.1.mk	0.820904	0.560413	turquoise													Pav_sc0001196.1_g1250.1.mk	0.820904	0.443316	turquoise
				Pav_sc0001859.1_g200.1.mk	0.820897	0.824435	turquoise													Pav_sc0001859.1_g200.1.mk	0.820897	0.874473	turquoise
				novel.1286	0.820855	0.574463	turquoise													novel.1286	0.820855	0.519992	turquoise
				novel.888	0.820111	0.57277	turquoise													novel.888	0.820111	0.511423	turquoise
				Pav_sc0000370.1_g580.1.mk	-0.819981	-0.841177	turquoise													Pav_sc0000370.1_g580.1.mk	-0.819981	-0.866591	turquoise
				Pav_sc0001497.1_g090.1.mk	0.819561	0.616711	turquoise													Pav_sc0001497.1_g090.1.mk	0.819561	0.603375	turquoise
				Pav_sc0002375.1_g240.1.mk	0.819527	0.864172	turquoise													Pav_sc0002375.1_g240.1.mk	0.819527	0.828695	turquoise
				Pav_sc0000148.1_g590.1.mk	0.819331	0.911114	turquoise													Pav_sc0000148.1_g590.1.mk	0.819331	0.872872	turquoise
				Pav_sc0000383.1_g1100.1.mk	0.819312	0.916328	turquoise													Pav_sc0000383.1_g1100.1.mk	0.819312	0.87225	turquoise
				Pav_sc0000669.1_g050.1.mk	0.819008	0.591723	turquoise													Pav_sc0000669.1_g050.1.mk	0.819008	0.514825	turquoise
				Pav_sc0001183.1_g510.1.mk	0.819003	0.588528	turquoise													Pav_sc0001183.1_g510.1.mk	0.819003	0.515341	turquoise
				Pav_sc0001545.1_g040.1.mk	0.818893	0.559529	turquoise													Pav_sc0001545.1_g040.1.mk	0.818893	0.500785	turquoise
				Pav_co4033671.1_g010.1.mk	0.818039	0.664548	turquoise													Pav_co4033671.1_g010.1.mk	0.818039	0.654668	turquoise
				Pav_sc0000348.1_g440.1.br	0.817961	0.819305	turquoise													Pav_sc0000348.1_g440.1.br	0.817961	0.749758	turquoise
				Pav_sc0000747.1_g410.1.mk	0.817806	0.653872	turquoise													Pav_sc0000747.1_g410.1.mk	0.817806	0.562395	turquoise
				Pav_sc0002360.1_g460.1.mk	-0.817548	-0.801272	turquoise													Pav_sc0002360.1_g460.1.mk	-0.817548	-0.798878	turquoise
				Pav_sc0001859.1_g360.1.br	0.817344	0.865912	turquoise													Pav_sc0001859.1_g360.1.br	0.817344	0.823101	turquoise
				Pav_sc0000766.1_g250.1.mk	0.817291	0.536876	turquoise													Pav_sc0000766.1_g250.1.mk	0.817291	0.458626	turquoise
				Pav_sc0000729.1_g190.1.br	0.817242	0.549313	turquoise													Pav_sc0000729.1_g190.1.br	0.817242	0.442949	turquoise
				Pav_sc0000780.1_g050.1.mk	0.817039	0.710178	turquoise													Pav_sc0000780.1_g050.1.mk	0.817039	0.642103	turquoise
				Pav_sc0000700.1_g1720.1.mk	0.816865	0.81157	turquoise													Pav_sc0000700.1_g1720.1.mk	0.816865	0.719557	turquoise
				Pav_sc0000383.1_g1130.1.mk	0.816421	0.780232	turquoise													Pav_sc0000383.1_g1130.1.mk	0.816421	0.655971	turquoise
				novel.479	0.816361	0.552208	turquoise													novel.479	0.816361	0.491662	turquoise
				Pav_sc0001196.1_g1040.1.mk	0.816187	0.559091	turquoise													Pav_sc0001196.1_g1040.1.mk	0.816187	0.496485	turquoise
				novel.887	0.815643	0.657185	turquoise													novel.887	0.815643	0.507253	turquoise
				Pav_sc0000323.1_g490.1.mk	0.815084	0.652337	turquoise													Pav_sc0000323.1_g490.1.mk	0.815084	0.594891	turquoise
				Pav_sc0001197.1_g100.1.mk	0.814532	0.781554	turquoise													Pav_sc0001197.1_g100.1.mk	0.814532	0.819742	turquoise
				Pav_sc0000721.1_g240.1.mk	0.814395	0.886788	turquoise													Pav_sc0000721.1_g240.1.mk	0.814395	0.861257	turquoise
				Pav_sc0001126.1_g170.1.mk	0.814152	0.566281	turquoise													Pav_sc0001126.1_g170.1.mk	0.814152	0.509608	turquoise
				Pav_sc0000414.1_g210.1.br	0.814122	0.782895	turquoise													Pav_sc0000414.1_g210.1.br	0.814122	0.786387	turquoise
				Pav_sc0002772.1_g140.1.mk	0.814066	0.694896	turquoise													Pav_sc0002772.1_g140.1.mk	0.814066	0.542381	turquoise
				Pav_sc0000675.1_g910.1.mk	-0.813614	-0.901816	turquoise													Pav_sc0000675.1_g910.1.mk	-0.813614	-0.916113	turquoise
				novel.1239	0.813507	0.813822	turquoise													novel.1239	0.813507	0.845831	turquoise
				Pav_sc0000373.1_g900.1.mk	0.812261	0.896813	turquoise													Pav_sc0000373.1_g900.1.mk	0.812261	0.891877	turquoise
				Pav_sc0000072.1_g140.1.mk	0.812218	0.86762	turquoise													Pav_sc0000072.1_g140.1.mk	0.812218	0.767362	turquoise
				Pav_sc0000464.1_g830.1.mk	0.811798	0.558675	turquoise													Pav_sc0000464.1_g830.1.mk	0.811798	0.507382	turquoise
				Pav_sc0001369.1_g310.1.mk	0.811684	0.798325	turquoise													Pav_sc0001369.1_g310.1.mk	0.811684	0.673403	turquoise
				Pav_sc0000467.1_g210.1.mk	0.810796	0.846184	turquoise													Pav_sc0000467.1_g210.1.mk	0.810796	0.772376	turquoise
				Pav_sc0000845.1_g230.1.mk	-0.810766	-0.843183	turquoise													Pav_sc0000845.1_g230.1.mk	-0.810766	-0.794827	turquoise
				Pav_sc0000671.1_g250.1.mk	0.810751	0.742023	turquoise													Pav_sc0000671.1_g250.1.mk	0.810751	0.647246	turquoise
				Pav_sc0000845.1_g250.1.mk	-0.810316	-0.756397	turquoise													Pav_sc0000845.1_g250.1.mk	-0.810316	-0.703343	turquoise
				Pav_sc0000998.1_g060.1.mk	0.810251	0.659633	turquoise													Pav_sc0000998.1_g060.1.mk	0.810251	0.535189	turquoise
				Pav_sc0000040.1_g820.1.mk	0.810228	0.859838	turquoise													Pav_sc0000040.1_g820.1.mk	0.810228	0.888935	turquoise
				Pav_sc0000467.1_g790.1.mk	0.810124	0.761873	turquoise													Pav_sc0000467.1_g790.1.mk	0.810124	0.707758	turquoise
				Pav_sc0001293.1_g140.1.br	0.809785	0.742361	turquoise													Pav_sc0001293.1_g140.1.br	0.809785	0.601889	turquoise
				Pav_sc0000909.1_g310.1.mk	0.809478	0.56031	turquoise													Pav_sc0000909.1_g310.1.mk	0.809478	0.492396	turquoise
				Pav_sc0001289.1_g500.1.mk	0.809051	0.912226	turquoise													Pav_sc0001289.1_g500.1.mk	0.809051	0.797513	turquoise
				Pav_sc0000108.1_g790.1.br	0.80837	0.543731	turquoise													Pav_sc0000108.1_g790.1.br	0.80837	0.487231	turquoise
				Pav_sc0001051.1_g190.1.mk	0.807958	0.888106	turquoise													Pav_sc0001051.1_g190.1.mk	0.807958	0.809069	turquoise
				Pav_sc0000004.1_g040.1.mk	0.807465	0.911214	turquoise													Pav_sc0000004.1_g040.1.mk	0.807465	0.827961	turquoise
				Pav_sc0000067.1_g170.1.br	0.807238	0.542522	turquoise													Pav_sc0000067.1_g170.1.br	0.807238	0.482312	turquoise
				Pav_sc0001065.1_g150.1.mk	-0.806462	-0.806284	turquoise													Pav_sc0001065.1_g150.1.mk	-0.806462	-0.763459	turquoise
				Pav_sc0000113.1_g620.1.mk	0.805246	0.886546	turquoise													Pav_sc0000113.1_g620.1.mk	0.805246	0.839443	turquoise
				Pav_sc0002208.1_g500.1.mk	0.805145	0.544912	turquoise													Pav_sc0002208.1_g500.1.mk	0.805145	0.491536	turquoise
				Pav_sc0001196.1_g2240.1.mk	0.80491	0.801936	turquoise													Pav_sc0001196.1_g2240.1.mk	0.80491	0.836761	turquoise
				Pav_sc0000355.1_g150.1.mk	0.804888	0.716709	turquoise													Pav_sc0000355.1_g150.1.mk	0.804888	0.743315	turquoise
				novel.696	-0.804863	-0.816914	turquoise													novel.696	-0.804863	-0.754069	turquoise
				novel.716	0.804757	0.566738	turquoise													novel.716	0.804757	0.491057	turquoise
				novel.919	0.804672	0.579954	turquoise													novel.919	0.804672	0.548418	turquoise
				Pav_sc0006850.1_g030.1.mk	0.804058	0.870006	turquoise													Pav_sc0006850.1_g030.1.mk	0.804058	0.878993	turquoise
				Pav_sc0000055.1_g600.1.mk	0.804002	0.923529	turquoise													Pav_sc0000055.1_g600.1.mk	0.804002	0.943872	turquoise
				Pav_sc0000373.1_g080.1.mk	0.803482	0.594904	turquoise													Pav_sc0000373.1_g080.1.mk	0.803482	0.454277	turquoise
				Pav_sc0000749.1_g150.1.mk	-0.803357	-0.838813	turquoise													Pav_sc0000749.1_g150.1.mk	-0.803357	-0.856156	turquoise
				Pav_co4025535.1_g010.1.mk	0.803285	0.825759	turquoise													Pav_co4025535.1_g010.1.mk	0.803285	0.805523	turquoise
				Pav_sc0003135.1_g920.1.mk	0.803182	0.528329	turquoise													Pav_sc0003135.1_g920.1.mk	0.803182	0.407359	turquoise
				Pav_sc0000207.1_g900.1.mk	-0.803013	-0.816661	turquoise													Pav_sc0000207.1_g900.1.mk	-0.803013	-0.832945	turquoise
				Pav_sc0000869.1_g540.1.br	0.802844	0.690544	turquoise													Pav_sc0000869.1_g540.1.br	0.802844	0.627023	turquoise
				Pav_sc0001218.1_g200.1.mk	0.802819	0.731903	turquoise													Pav_sc0001218.1_g200.1.mk	0.802819	0.763242	turquoise
				Pav_sc0000024.1_g280.1.br	0.802787	0.90092	turquoise													Pav_sc0000024.1_g280.1.br	0.802787	0.872754	turquoise
				Pav_sc0000691.1_g430.1.mk	0.80277	0.52016	turquoise													Pav_sc0000691.1_g430.1.mk	0.80277	0.433633	turquoise
				Pav_sc0000095.1_g1330.1.mk	0.802669	0.881703	turquoise													Pav_sc0000095.1_g1330.1.mk	0.802669	0.833218	turquoise
				Pav_sc0001954.1_g130.1.mk	0.8026	0.846966	turquoise													Pav_sc0001954.1_g130.1.mk	0.8026	0.768255	turquoise
				Pav_sc0001175.1_g250.1.mk	0.802551	0.863727	turquoise													Pav_sc0001175.1_g250.1.mk	0.802551	0.846096	turquoise
				Pav_sc0002327.1_g570.1.mk	0.802141	0.939706	turquoise													Pav_sc0002327.1_g570.1.mk	0.802141	0.847702	turquoise
				Pav_sc0004354.1_g120.1.mk	0.802135	0.742927	turquoise													Pav_sc0004354.1_g120.1.mk	0.802135	0.707629	turquoise
				Pav_sc0000624.1_g030.1.mk	-0.801758	-0.745524	turquoise													Pav_sc0000624.1_g030.1.mk	-0.801758	-0.64928	turquoise
				Pav_sc0002233.1_g200.1.mk	0.801721	0.539747	turquoise													Pav_sc0002233.1_g200.1.mk	0.801721	0.480351	turquoise
				Pav_sc0000131.1_g520.1.br	0.801684	0.655612	turquoise													Pav_sc0000131.1_g520.1.br	0.801684	0.552678	turquoise
				Pav_sc0000629.1_g050.1.mk	0.801653	0.571136	turquoise													Pav_sc0000629.1_g050.1.mk	0.801653	0.433403	turquoise
				Pav_sc0000862.1_g270.1.mk	0.801596	0.536843	turquoise													Pav_sc0000862.1_g270.1.mk	0.801596	0.453913	turquoise
				Pav_sc0001309.1_g150.1.mk	0.800785	0.786273	turquoise													Pav_sc0001309.1_g150.1.mk	0.800785	0.749893	turquoise
				Pav_sc0003562.1_g230.1.mk	0.800676	0.652717	turquoise													Pav_sc0003562.1_g230.1.mk	0.800676	0.495767	turquoise
				Pav_sc0003584.1_g050.1.br	0.800395	0.756665	turquoise													Pav_sc0003584.1_g050.1.br	0.800395	0.674543	turquoise
				Pav_sc0002842.1_g090.1.mk	0.800306	0.849217	turquoise													Pav_sc0002842.1_g090.1.mk	0.800306	0.811684	turquoise
				Pav_sc0001293.1_g060.1.mk	-0.800281	-0.765958	turquoise													Pav_sc0001293.1_g060.1.mk	-0.800281	-0.647135	turquoise
				Pav_sc0000583.1_g850.1.mk	-0.800224	-0.84066	turquoise													Pav_sc0000583.1_g850.1.mk	-0.800224	-0.863427	turquoise
				Pav_co4080209.1_g010.1.mk	-0.800107	-0.803997	turquoise													Pav_co4080209.1_g010.1.mk	-0.800107	-0.826298	turquoise
				Pav_sc0003759.1_g060.1.mk	0.799898	0.678634	turquoise													Pav_sc0003759.1_g060.1.mk	0.799898	0.573181	turquoise
				Pav_sc0000800.1_g320.1.mk	-0.799055	-0.863623	turquoise													Pav_sc0000800.1_g320.1.mk	-0.799055	-0.8956	turquoise
				Pav_sc0000348.1_g550.1.mk	0.799012	0.771841	turquoise													Pav_sc0000348.1_g550.1.mk	0.799012	0.689883	turquoise
				Pav_sc0000095.1_g1410.1.mk	-0.798467	-0.792943	turquoise													Pav_sc0000095.1_g1410.1.mk	-0.798467	-0.771231	turquoise
				Pav_sc0001305.1_g020.1.mk	-0.798448	-0.844803	turquoise													Pav_sc0001305.1_g020.1.mk	-0.798448	-0.828761	turquoise
				Pav_sc0001341.1_g370.1.mk	0.798385	0.734298	turquoise													Pav_sc0001341.1_g370.1.mk	0.798385	0.641327	turquoise
				Pav_sc0000009.1_g500.1.br	-0.798043	-0.74503	turquoise													Pav_sc0000009.1_g500.1.br	-0.798043	-0.661006	turquoise
				Pav_sc0000624.1_g1300.1.mk	-0.79799	-0.791623	turquoise													Pav_sc0000624.1_g1300.1.mk	-0.79799	-0.706659	turquoise
				Pav_sc0000740.1_g310.1.mk	-0.797919	-0.760555	turquoise													Pav_sc0000740.1_g310.1.mk	-0.797919	-0.707141	turquoise
				Pav_sc0002060.1_g020.1.br	0.797863	0.531609	turquoise													Pav_sc0002060.1_g020.1.br	0.797863	0.450238	turquoise
				Pav_sc0000862.1_g280.1.br	0.797767	0.614991	turquoise													Pav_sc0000862.1_g280.1.br	0.797767	0.501344	turquoise
				Pav_sc0000586.1_g930.1.mk	0.797238	0.777428	turquoise													Pav_sc0000586.1_g930.1.mk	0.797238	0.710911	turquoise
				Pav_sc0000129.1_g920.1.mk	-0.797107	-0.786448	turquoise													Pav_sc0000129.1_g920.1.mk	-0.797107	-0.725005	turquoise
				Pav_sc0001710.1_g650.1.mk	0.796828	0.803469	turquoise													Pav_sc0001710.1_g650.1.mk	0.796828	0.709562	turquoise
				novel.1274	0.796808	0.570187	turquoise													novel.1274	0.796808	0.51195	turquoise
				Pav_sc0006044.1_g010.1.mk	-0.796096	-0.841247	turquoise													Pav_sc0006044.1_g010.1.mk	-0.796096	-0.832998	turquoise
				Pav_sc0000862.1_g390.1.br	0.795638	0.913429	turquoise													Pav_sc0000862.1_g390.1.br	0.795638	0.903486	turquoise
				Pav_sc0001181.1_g940.1.mk	0.795244	0.888341	turquoise													Pav_sc0001181.1_g940.1.mk	0.795244	0.892915	turquoise
				Pav_sc0001265.1_g080.1.mk	-0.795105	-0.812904	turquoise													Pav_sc0001265.1_g080.1.mk	-0.795105	-0.842121	turquoise
				Pav_sc0000600.1_g600.1.mk	0.795046	0.889392	turquoise													Pav_sc0000600.1_g600.1.mk	0.795046	0.899363	turquoise
				Pav_sc0001196.1_g1060.1.mk	0.794683	0.890304	turquoise													Pav_sc0001196.1_g1060.1.mk	0.794683	0.874452	turquoise
				Pav_sc0001529.1_g060.1.mk	0.794515	0.754853	turquoise													Pav_sc0001529.1_g060.1.mk	0.794515	0.676048	turquoise
				Pav_sc0001196.1_g1900.1.mk	-0.794416	-0.807259	turquoise													Pav_sc0001196.1_g1900.1.mk	-0.794416	-0.796013	turquoise
				novel.1225	0.794076	0.813079	turquoise													novel.1225	0.794076	0.776028	turquoise
				Pav_sc0001192.1_g150.1.mk	0.794074	0.730693	turquoise													Pav_sc0001192.1_g150.1.mk	0.794074	0.636938	turquoise
				Pav_sc0000813.1_g050.1.mk	0.793715	0.527163	turquoise													Pav_sc0000813.1_g050.1.mk	0.793715	0.466434	turquoise
				Pav_sc0005810.1_g070.1.br	-0.793329	-0.749562	turquoise													Pav_sc0005810.1_g070.1.br	-0.793329	-0.657041	turquoise
				Pav_sc0000383.1_g280.1.mk	0.793259	0.837881	turquoise													Pav_sc0000383.1_g280.1.mk	0.793259	0.746092	turquoise
				Pav_sc0000758.1_g440.1.mk	0.793075	0.867025	turquoise													Pav_sc0000758.1_g440.1.mk	0.793075	0.854501	turquoise
				Pav_sc0002250.1_g180.1.mk	0.792955	0.733658	turquoise													Pav_sc0002250.1_g180.1.mk	0.792955	0.619258	turquoise
				Pav_sc0000164.1_g090.1.mk	0.792623	0.662254	turquoise													Pav_sc0000164.1_g090.1.mk	0.792623	0.616013	turquoise
				Pav_sc0001015.1_g230.1.mk	0.79242	0.696118	turquoise													Pav_sc0001015.1_g230.1.mk	0.79242	0.604017	turquoise
				Pav_sc0000107.1_g300.1.mk	-0.792096	-0.852832	turquoise													Pav_sc0000107.1_g300.1.mk	-0.792096	-0.868117	turquoise
				Pav_sc0000440.1_g280.1.mk	-0.792096	-0.771151	turquoise													Pav_sc0000440.1_g280.1.mk	-0.792096	-0.676401	turquoise
				Pav_sc0000040.1_g880.1.mk	0.791599	0.718151	turquoise													Pav_sc0000040.1_g880.1.mk	0.791599	0.579901	turquoise
				Pav_sc0000071.1_g920.1.mk	0.791494	0.538046	turquoise													Pav_sc0000071.1_g920.1.mk	0.791494	0.455432	turquoise
				Pav_sc0000366.1_g050.1.mk	0.791459	0.601663	turquoise													Pav_sc0000366.1_g050.1.mk	0.791459	0.515803	turquoise
				Pav_sc0001335.1_g560.1.mk	0.791066	0.723563	turquoise													Pav_sc0001335.1_g560.1.mk	0.791066	0.622982	turquoise
				Pav_sc0000040.1_g250.1.mk	0.790607	0.880908	turquoise													Pav_sc0000040.1_g250.1.mk	0.790607	0.821446	turquoise
				Pav_sc0001740.1_g160.1.mk	0.790108	0.840872	turquoise													Pav_sc0001740.1_g160.1.mk	0.790108	0.851716	turquoise
				Pav_sc0000412.1_g170.1.mk	0.790094	0.59237	turquoise													Pav_sc0000412.1_g170.1.mk	0.790094	0.437295	turquoise
				Pav_sc0001126.1_g250.1.br	0.790081	0.794405	turquoise													Pav_sc0001126.1_g250.1.br	0.790081	0.703946	turquoise
				Pav_sc0001196.1_g920.1.br	0.790059	0.867489	turquoise													Pav_sc0001196.1_g920.1.br	0.790059	0.81867	turquoise
				Pav_sc0001263.1_g090.1.mk	0.789623	0.87587	turquoise													Pav_sc0001263.1_g090.1.mk	0.789623	0.835113	turquoise
				Pav_sc0000773.1_g090.1.mk	-0.789601	-0.854373	turquoise													Pav_sc0000773.1_g090.1.mk	-0.789601	-0.860814	turquoise
				Pav_sc0000886.1_g240.1.mk	0.788808	0.794421	turquoise													Pav_sc0000886.1_g240.1.mk	0.788808	0.676739	turquoise
				Pav_sc0006018.1_g180.1.mk	0.788761	0.648496	turquoise													Pav_sc0006018.1_g180.1.mk	0.788761	0.512762	turquoise
				Pav_sc0000363.1_g740.1.mk	0.788554	0.918321	turquoise													Pav_sc0000363.1_g740.1.mk	0.788554	0.920051	turquoise
				Pav_sc0000028.1_g090.1.mk	0.788389	0.899197	turquoise													Pav_sc0000028.1_g090.1.mk	0.788389	0.861544	turquoise
				Pav_sc0000370.1_g560.1.mk	-0.788374	-0.856826	turquoise													Pav_sc0000370.1_g560.1.mk	-0.788374	-0.898994	turquoise
				novel.209	-0.788138	-0.81864	turquoise													novel.209	-0.788138	-0.867686	turquoise
				Pav_sc0004456.1_g190.1.mk	0.787264	0.587133	turquoise													Pav_sc0004456.1_g190.1.mk	0.787264	0.472803	turquoise
				Pav_sc0002342.1_g040.1.br	0.786477	0.89272	turquoise													Pav_sc0002342.1_g040.1.br	0.786477	0.849745	turquoise
				Pav_sc0000017.1_g860.1.mk	0.786394	0.856115	turquoise													Pav_sc0000017.1_g860.1.mk	0.786394	0.78202	turquoise
				Pav_sc0000072.1_g490.1.mk	-0.785266	-0.820675	turquoise													Pav_sc0000072.1_g490.1.mk	-0.785266	-0.851362	turquoise
				Pav_sc0000308.1_g420.1.mk	-0.78519	-0.854091	turquoise													Pav_sc0000308.1_g420.1.mk	-0.78519	-0.897239	turquoise
				novel.711	0.784675	0.601263	turquoise													novel.711	0.784675	0.529686	turquoise
				Pav_sc0000130.1_g860.1.mk	0.784572	0.531892	turquoise													Pav_sc0000130.1_g860.1.mk	0.784572	0.444504	turquoise
				Pav_sc0002842.1_g030.1.mk	0.784529	0.525177	turquoise													Pav_sc0002842.1_g030.1.mk	0.784529	0.384492	turquoise
				Pav_sc0000909.1_g080.1.mk	0.784361	0.786965	turquoise													Pav_sc0000909.1_g080.1.mk	0.784361	0.827314	turquoise
				Pav_sc0000780.1_g460.1.mk	0.784312	0.870121	turquoise													Pav_sc0000780.1_g460.1.mk	0.784312	0.881691	turquoise
				Pav_sc0000554.1_g1730.1.mk	-0.783802	-0.731524	turquoise													Pav_sc0000554.1_g1730.1.mk	-0.783802	-0.668664	turquoise
				Pav_sc0001258.1_g740.1.mk	0.783766	0.882777	turquoise													Pav_sc0001258.1_g740.1.mk	0.783766	0.862561	turquoise
				Pav_sc0000910.1_g440.1.mk	-0.783722	-0.778611	turquoise													Pav_sc0000910.1_g440.1.mk	-0.783722	-0.793984	turquoise
				Pav_sc0000351.1_g520.1.br	0.78321	0.515361	turquoise													Pav_sc0000351.1_g520.1.br	0.78321	0.4555	turquoise
				Pav_sc0000428.1_g350.1.mk	0.783203	0.545635	turquoise													Pav_sc0000428.1_g350.1.mk	0.783203	0.471213	turquoise
				Pav_sc0000216.1_g1190.1.mk	-0.782754	-0.82993	turquoise													Pav_sc0000216.1_g1190.1.mk	-0.782754	-0.788979	turquoise
				Pav_sc0000549.1_g1100.1.mk	-0.782722	-0.849816	turquoise													Pav_sc0000549.1_g1100.1.mk	-0.782722	-0.878392	turquoise
				Pav_sc0001323.1_g990.1.br	-0.782694	-0.805367	turquoise													Pav_sc0001323.1_g990.1.br	-0.782694	-0.820009	turquoise
				Pav_sc0005509.1_g090.1.mk	0.782602	0.55216	turquoise													Pav_sc0005509.1_g090.1.mk	0.782602	0.53878	turquoise
				Pav_sc0000845.1_g210.1.mk	0.78256	0.916598	turquoise													Pav_sc0000845.1_g210.1.mk	0.78256	0.87883	turquoise
				Pav_sc0002233.1_g270.1.mk	-0.78247	-0.805575	turquoise													Pav_sc0002233.1_g270.1.mk	-0.78247	-0.814724	turquoise
				Pav_sc0000072.1_g350.1.mk	0.782125	0.797888	turquoise													Pav_sc0000072.1_g350.1.mk	0.782125	0.732358	turquoise
				Pav_sc0001305.1_g070.1.mk	-0.782039	-0.792139	turquoise													Pav_sc0001305.1_g070.1.mk	-0.782039	-0.74385	turquoise
				Pav_sc0001528.1_g120.1.mk	0.781972	0.63727	turquoise													Pav_sc0001528.1_g120.1.mk	0.781972	0.523744	turquoise
				Pav_sc0002234.1_g030.1.mk	0.781952	0.575117	turquoise													Pav_sc0002234.1_g030.1.mk	0.781952	0.503498	turquoise
				Pav_sc0000910.1_g100.1.mk	-0.781919	-0.744703	turquoise													Pav_sc0000910.1_g100.1.mk	-0.781919	-0.61154	turquoise
				Pav_sc0002584.1_g200.1.mk	0.781874	0.511378	turquoise													Pav_sc0002584.1_g200.1.mk	0.781874	0.449587	turquoise
				novel.491	-0.781375	-0.807139	turquoise													novel.491	-0.781375	-0.778738	turquoise
				Pav_sc0002318.1_g540.1.mk	-0.781364	-0.817681	turquoise													Pav_sc0002318.1_g540.1.mk	-0.781364	-0.845761	turquoise
				Pav_sc0001974.1_g130.1.mk	0.781109	0.779464	turquoise													Pav_sc0001974.1_g130.1.mk	0.781109	0.789112	turquoise
				Pav_sc0000567.1_g1080.1.mk	0.780942	0.595527	turquoise													Pav_sc0000567.1_g1080.1.mk	0.780942	0.427757	turquoise
				Pav_sc0000464.1_g1080.1.mk	0.780467	0.504778	turquoise													Pav_sc0000464.1_g1080.1.mk	0.780467	0.380057	turquoise
				Pav_sc0003867.1_g120.1.mk	0.779931	0.556241	turquoise													Pav_sc0003867.1_g120.1.mk	0.779931	0.493922	turquoise
				Pav_sc0000040.1_g350.1.mk	0.779444	0.630806	turquoise													Pav_sc0000040.1_g350.1.mk	0.779444	0.488402	turquoise
				Pav_sc0000862.1_g100.1.mk	0.779254	0.504843	turquoise													Pav_sc0000862.1_g100.1.mk	0.779254	0.430384	turquoise
				Pav_sc0001181.1_g520.1.mk	0.779182	0.60854	turquoise													Pav_sc0001181.1_g520.1.mk	0.779182	0.518513	turquoise
				Pav_sc0000229.1_g120.1.mk	-0.778158	-0.81917	turquoise													Pav_sc0000229.1_g120.1.mk	-0.778158	-0.804641	turquoise
				Pav_sc0000800.1_g1630.1.mk	0.777935	0.699374	turquoise													Pav_sc0000800.1_g1630.1.mk	0.777935	0.690498	turquoise
				Pav_sc0002318.1_g240.1.mk	0.777786	0.513659	turquoise													Pav_sc0002318.1_g240.1.mk	0.777786	0.412499	turquoise
				Pav_sc0000029.1_g180.1.mk	-0.777761	-0.8331	turquoise													Pav_sc0000029.1_g180.1.mk	-0.777761	-0.81729	turquoise
				novel.347	0.777669	0.528405	turquoise													novel.347	0.777669	0.489148	turquoise
				Pav_sc0002544.1_g080.1.mk	0.777467	0.792933	turquoise													Pav_sc0002544.1_g080.1.mk	0.777467	0.713929	turquoise
				Pav_sc0000175.1_g270.1.mk	0.77738	0.673935	turquoise													Pav_sc0000175.1_g270.1.mk	0.77738	0.582561	turquoise
				Pav_sc0000410.1_g820.1.mk	0.777326	0.874553	turquoise													Pav_sc0000410.1_g820.1.mk	0.777326	0.795214	turquoise
				Pav_sc0001006.1_g280.1.mk	-0.776204	-0.822191	turquoise													Pav_sc0001006.1_g280.1.mk	-0.776204	-0.8546	turquoise
				Pav_sc0003169.1_g240.1.mk	0.776002	0.601565	turquoise													Pav_sc0003169.1_g240.1.mk	0.776002	0.441981	turquoise
				Pav_sc0001405.1_g1410.1.mk	-0.775504	-0.793839	turquoise													Pav_sc0001405.1_g1410.1.mk	-0.775504	-0.786657	turquoise
				Pav_sc0001938.1_g420.1.mk	-0.774769	-0.814679	turquoise													Pav_sc0001938.1_g420.1.mk	-0.774769	-0.810716	turquoise
				Pav_sc0000652.1_g430.1.mk	-0.774762	-0.704768	turquoise													Pav_sc0000652.1_g430.1.mk	-0.774762	-0.624603	turquoise
				Pav_sc0002623.1_g220.1.mk	0.774707	0.745613	turquoise													Pav_sc0002623.1_g220.1.mk	0.774707	0.66771	turquoise
				Pav_sc0001309.1_g410.1.mk	0.774674	0.761783	turquoise													Pav_sc0001309.1_g410.1.mk	0.774674	0.620576	turquoise
				Pav_sc0002055.1_g080.1.mk	-0.77429	-0.847755	turquoise													Pav_sc0002055.1_g080.1.mk	-0.77429	-0.902844	turquoise
				Pav_sc0001663.1_g160.1.br	0.774103	0.841565	turquoise													Pav_sc0001663.1_g160.1.br	0.774103	0.779328	turquoise
				Pav_sc0000554.1_g2290.1.mk	0.774029	0.852474	turquoise													Pav_sc0000554.1_g2290.1.mk	0.774029	0.817217	turquoise
				Pav_sc0000500.1_g210.1.mk	0.773501	0.674353	turquoise													Pav_sc0000500.1_g210.1.mk	0.773501	0.537796	turquoise
				Pav_sc0000183.1_g310.1.mk	0.773263	0.494013	turquoise													Pav_sc0000183.1_g310.1.mk	0.773263	0.381483	turquoise
				Pav_sc0001242.1_g010.1.br	0.77322	0.723425	turquoise													Pav_sc0001242.1_g010.1.br	0.77322	0.743932	turquoise
				Pav_sc0001243.1_g170.1.mk	-0.772663	-0.836525	turquoise													Pav_sc0001243.1_g170.1.mk	-0.772663	-0.899813	turquoise
				Pav_sc0001112.1_g070.1.mk	0.771153	0.558537	turquoise													Pav_sc0001112.1_g070.1.mk	0.771153	0.526781	turquoise
				Pav_sc0002998.1_g100.1.mk	0.770969	0.593694	turquoise													Pav_sc0002998.1_g100.1.mk	0.770969	0.465473	turquoise
				Pav_sc0000588.1_g740.1.mk	0.770888	0.846002	turquoise													Pav_sc0000588.1_g740.1.mk	0.770888	0.763566	turquoise
				Pav_sc0002230.1_g010.1.br	0.770783	0.772085	turquoise													Pav_sc0002230.1_g010.1.br	0.770783	0.701747	turquoise
				Pav_sc0001084.1_g400.1.mk	-0.770672	-0.730908	turquoise													Pav_sc0001084.1_g400.1.mk	-0.770672	-0.645121	turquoise
				Pav_sc0001205.1_g080.1.mk	0.770523	0.590534	turquoise													Pav_sc0001205.1_g080.1.mk	0.770523	0.457416	turquoise
				Pav_sc0000800.1_g020.1.mk	0.770002	0.739581	turquoise													Pav_sc0000800.1_g020.1.mk	0.770002	0.679648	turquoise
				Pav_sc0001479.1_g070.1.mk	0.769997	0.721454	turquoise													Pav_sc0001479.1_g070.1.mk	0.769997	0.624248	turquoise
				Pav_sc0001710.1_g1400.1.mk	0.769932	0.654244	turquoise													Pav_sc0001710.1_g1400.1.mk	0.769932	0.623965	turquoise
				Pav_sc0000065.1_g020.1.mk	-0.769845	-0.824073	turquoise													Pav_sc0000065.1_g020.1.mk	-0.769845	-0.829651	turquoise
				Pav_sc0002136.1_g330.1.mk	0.769609	0.703031	turquoise													Pav_sc0002136.1_g330.1.mk	0.769609	0.682803	turquoise
				Pav_sc0001175.1_g050.1.mk	0.769603	0.77828	turquoise													Pav_sc0001175.1_g050.1.mk	0.769603	0.774724	turquoise
				Pav_sc0000636.1_g220.1.mk	0.768966	0.799941	turquoise													Pav_sc0000636.1_g220.1.mk	0.768966	0.723973	turquoise
				Pav_sc0004043.1_g070.1.mk	0.768965	0.864261	turquoise													Pav_sc0004043.1_g070.1.mk	0.768965	0.840911	turquoise
				Pav_sc0000148.1_g490.1.mk	-0.76859	-0.785895	turquoise													Pav_sc0000148.1_g490.1.mk	-0.76859	-0.797682	turquoise
				Pav_sc0000852.1_g1220.1.mk	-0.768416	-0.633277	turquoise													Pav_sc0000852.1_g1220.1.mk	-0.768416	-0.46912	turquoise
				Pav_sc0000069.1_g690.1.mk	-0.768273	-0.80926	turquoise													Pav_sc0000069.1_g690.1.mk	-0.768273	-0.811016	turquoise
				Pav_sc0000271.1_g100.1.mk	-0.768236	-0.846373	turquoise													Pav_sc0000271.1_g100.1.mk	-0.768236	-0.851356	turquoise
				Pav_sc0000589.1_g290.1.mk	0.767804	0.624583	turquoise													Pav_sc0000589.1_g290.1.mk	0.767804	0.476703	turquoise
				Pav_sc0000754.1_g430.1.br	0.767551	0.922848	turquoise													Pav_sc0000754.1_g430.1.br	0.767551	0.856596	turquoise
				Pav_sc0000467.1_g940.1.mk	-0.767365	-0.759043	turquoise													Pav_sc0000467.1_g940.1.mk	-0.767365	-0.708959	turquoise
				novel.743	0.767235	0.881544	turquoise													novel.743	0.767235	0.807082	turquoise
				Pav_sc0000584.1_g350.1.mk	0.766825	0.839759	turquoise													Pav_sc0000584.1_g350.1.mk	0.766825	0.774137	turquoise
				Pav_sc0000862.1_g360.1.mk	0.766713	0.885809	turquoise													Pav_sc0000862.1_g360.1.mk	0.766713	0.842919	turquoise
				Pav_sc0001305.1_g740.1.mk	0.766709	0.84882	turquoise													Pav_sc0001305.1_g740.1.mk	0.766709	0.754059	turquoise
				Pav_sc0000554.1_g270.1.mk	-0.766536	-0.622861	turquoise													Pav_sc0000554.1_g270.1.mk	-0.766536	-0.524372	turquoise
				Pav_sc0000491.1_g950.1.br	-0.765456	-0.801298	turquoise													Pav_sc0000491.1_g950.1.br	-0.765456	-0.744659	turquoise
				Pav_sc0000598.1_g040.1.mk	0.765419	0.539363	turquoise													Pav_sc0000598.1_g040.1.mk	0.765419	0.433964	turquoise
				Pav_sc0000143.1_g650.1.mk	0.765135	0.889682	turquoise													Pav_sc0000143.1_g650.1.mk	0.765135	0.862155	turquoise
				Pav_sc0000212.1_g540.1.mk	-0.764928	-0.772304	turquoise													Pav_sc0000212.1_g540.1.mk	-0.764928	-0.767529	turquoise
				Pav_sc0000719.1_g810.1.mk	0.764915	0.58657	turquoise													Pav_sc0000719.1_g810.1.mk	0.764915	0.444211	turquoise
				Pav_sc0001405.1_g480.1.mk	-0.764287	-0.781723	turquoise													Pav_sc0001405.1_g480.1.mk	-0.764287	-0.769791	turquoise
				Pav_sc0001938.1_g210.1.mk	0.764042	0.780195	turquoise													Pav_sc0001938.1_g210.1.mk	0.764042	0.728301	turquoise
				Pav_sc0000216.1_g030.1.mk	0.763578	0.661749	turquoise													Pav_sc0000216.1_g030.1.mk	0.763578	0.483612	turquoise
				Pav_sc0000087.1_g560.1.mk	-0.763557	-0.769984	turquoise													Pav_sc0000087.1_g560.1.mk	-0.763557	-0.688519	turquoise
				Pav_sc0000558.1_g130.1.mk	0.763132	0.806636	turquoise													Pav_sc0000558.1_g130.1.mk	0.763132	0.757696	turquoise
				Pav_sc0001077.1_g280.1.mk	0.762849	0.784214	turquoise													Pav_sc0001077.1_g280.1.mk	0.762849	0.727072	turquoise
				Pav_sc0001196.1_g1020.1.mk	0.762784	0.618336	turquoise													Pav_sc0001196.1_g1020.1.mk	0.762784	0.547803	turquoise
				Pav_sc0000449.1_g290.1.mk	-0.762746	-0.819722	turquoise													Pav_sc0000449.1_g290.1.mk	-0.762746	-0.882756	turquoise
				Pav_sc0000467.1_g1080.1.mk	-0.762345	-0.757332	turquoise													Pav_sc0000467.1_g1080.1.mk	-0.762345	-0.686578	turquoise
				Pav_sc0001227.1_g020.1.mk	0.762227	0.827591	turquoise													Pav_sc0001227.1_g020.1.mk	0.762227	0.717085	turquoise
				Pav_sc0000700.1_g1170.1.mk	-0.762141	-0.782631	turquoise													Pav_sc0000700.1_g1170.1.mk	-0.762141	-0.750842	turquoise
				Pav_co4019015.1_g010.1.mk	0.760816	0.774202	turquoise													Pav_co4019015.1_g010.1.mk	0.760816	0.670603	turquoise
				Pav_sc0000563.1_g010.1.mk	0.760541	0.904015	turquoise													Pav_sc0000563.1_g010.1.mk	0.760541	0.793246	turquoise
				Pav_sc0002271.1_g020.1.mk	-0.759976	-0.807125	turquoise													Pav_sc0002271.1_g020.1.mk	-0.759976	-0.816873	turquoise
				Pav_sc0000499.1_g140.1.mk	0.758919	0.534491	turquoise													Pav_sc0000499.1_g140.1.mk	0.758919	0.39821	turquoise
				Pav_sc0000009.1_g010.1.mk	-0.758815	-0.715658	turquoise													Pav_sc0000009.1_g010.1.mk	-0.758815	-0.640727	turquoise
				novel.1110	0.758328	0.600514	turquoise													novel.1110	0.758328	0.585967	turquoise
				Pav_sc0000069.1_g480.1.mk	0.758172	0.629964	turquoise													Pav_sc0000069.1_g480.1.mk	0.758172	0.550977	turquoise
				Pav_sc0000065.1_g260.1.mk	0.75811	0.743047	turquoise													Pav_sc0000065.1_g260.1.mk	0.75811	0.614197	turquoise
				Pav_sc0001196.1_g1100.1.mk	0.757933	0.867553	turquoise													Pav_sc0001196.1_g1100.1.mk	0.757933	0.802722	turquoise
				Pav_sc0000311.1_g940.1.mk	0.757638	0.654341	turquoise													Pav_sc0000311.1_g940.1.mk	0.757638	0.620626	turquoise
				Pav_sc0010922.1_g020.1.br	0.757544	0.766811	turquoise													Pav_sc0010922.1_g020.1.br	0.757544	0.740077	turquoise
				Pav_sc0001825.1_g200.1.mk	0.757095	0.67885	turquoise													Pav_sc0001825.1_g200.1.mk	0.757095	0.586024	turquoise
				Pav_sc0000099.1_g660.1.mk	0.757014	0.841512	turquoise													Pav_sc0000099.1_g660.1.mk	0.757014	0.811858	turquoise
				Pav_sc0001289.1_g200.1.mk	0.756213	0.768577	turquoise													Pav_sc0001289.1_g200.1.mk	0.756213	0.691177	turquoise
				Pav_sc0001098.1_g040.1.mk	0.755951	0.878538	turquoise													Pav_sc0001098.1_g040.1.mk	0.755951	0.85952	turquoise
				Pav_sc0000029.1_g150.1.mk	0.755896	0.849513	turquoise													Pav_sc0000029.1_g150.1.mk	0.755896	0.811836	turquoise
				Pav_sc0001718.1_g150.1.mk	0.755274	0.573946	turquoise													Pav_sc0001718.1_g150.1.mk	0.755274	0.489814	turquoise
				Pav_co4088907.1_g010.1.mk	0.75495	0.750583	turquoise													Pav_co4088907.1_g010.1.mk	0.75495	0.632869	turquoise
				Pav_sc0003138.1_g040.1.mk	-0.754813	-0.807754	turquoise													Pav_sc0003138.1_g040.1.mk	-0.754813	-0.790195	turquoise
				novel.258	-0.754797	-0.781859	turquoise													novel.258	-0.754797	-0.69673	turquoise
				Pav_sc0000017.1_g680.1.mk	0.75364	0.515181	turquoise													Pav_sc0000017.1_g680.1.mk	0.75364	0.459399	turquoise
				Pav_sc0000700.1_g710.1.mk	0.75329	0.868154	turquoise													Pav_sc0000700.1_g710.1.mk	0.75329	0.879826	turquoise
				Pav_sc0003851.1_g030.1.br	0.752446	0.846412	turquoise													Pav_sc0003851.1_g030.1.br	0.752446	0.778966	turquoise
				Pav_sc0003614.1_g330.1.mk	0.752336	0.742696	turquoise													Pav_sc0003614.1_g330.1.mk	0.752336	0.662912	turquoise
				Pav_sc0000254.1_g090.1.mk	-0.75192	-0.806939	turquoise													Pav_sc0000254.1_g090.1.mk	-0.75192	-0.840922	turquoise
				Pav_sc0005746.1_g110.1.mk	0.75126	0.557315	turquoise													Pav_sc0005746.1_g110.1.mk	0.75126	0.543456	turquoise
				Pav_sc0001710.1_g400.1.mk	0.750973	0.767509	turquoise													Pav_sc0001710.1_g400.1.mk	0.750973	0.69084	turquoise
				Pav_sc0002387.1_g180.1.br	-0.749802	-0.792768	turquoise													Pav_sc0002387.1_g180.1.br	-0.749802	-0.74222	turquoise
				Pav_sc0000691.1_g660.1.mk	0.74969	0.929763	turquoise													Pav_sc0000691.1_g660.1.mk	0.74969	0.886677	turquoise
				Pav_sc0000975.1_g010.1.mk	0.749242	0.807757	turquoise													Pav_sc0000975.1_g010.1.mk	0.749242	0.759293	turquoise
				Pav_sc0000852.1_g100.1.br	0.749217	0.46393	turquoise													Pav_sc0000852.1_g100.1.br	0.749217	0.383327	turquoise
				Pav_sc0007269.1_g010.1.mk	0.748768	0.478406	turquoise													Pav_sc0007269.1_g010.1.mk	0.748768	0.429838	turquoise
				Pav_sc0001528.1_g190.1.mk	-0.748703	-0.694102	turquoise													Pav_sc0001528.1_g190.1.mk	-0.748703	-0.60429	turquoise
				Pav_sc0008713.1_g020.1.mk	0.74797	0.503313	turquoise													Pav_sc0008713.1_g020.1.mk	0.74797	0.411073	turquoise
				Pav_sc0003098.1_g120.1.mk	0.747933	0.480195	turquoise													Pav_sc0003098.1_g120.1.mk	0.747933	0.416183	turquoise
				Pav_sc0000999.1_g120.1.mk	0.747743	0.513412	turquoise													Pav_sc0000999.1_g120.1.mk	0.747743	0.378897	turquoise
				Pav_sc0000009.1_g1290.1.br	0.747587	0.708925	turquoise													Pav_sc0000009.1_g1290.1.br	0.747587	0.780684	turquoise
				Pav_sc0003135.1_g050.1.mk	-0.747349	-0.80377	turquoise													Pav_sc0003135.1_g050.1.mk	-0.747349	-0.806073	turquoise
				Pav_sc0000359.1_g110.1.mk	0.746843	0.557571	turquoise													Pav_sc0000359.1_g110.1.mk	0.746843	0.543899	turquoise
				Pav_sc0000893.1_g780.1.mk	-0.746118	-0.834505	turquoise													Pav_sc0000893.1_g780.1.mk	-0.746118	-0.855606	turquoise
				Pav_sc0000194.1_g150.1.mk	0.745647	0.781605	turquoise													Pav_sc0000194.1_g150.1.mk	0.745647	0.622227	turquoise
				Pav_sc0001545.1_g070.1.mk	0.745636	0.458416	turquoise													Pav_sc0001545.1_g070.1.mk	0.745636	0.34016	turquoise
				Pav_sc0002156.1_g120.1.mk	0.745542	0.769736	turquoise													Pav_sc0002156.1_g120.1.mk	0.745542	0.742624	turquoise
				Pav_sc0000355.1_g130.1.mk	-0.745513	-0.739786	turquoise													Pav_sc0000355.1_g130.1.mk	-0.745513	-0.640282	turquoise
				Pav_sc0000549.1_g840.1.mk	0.745478	0.651184	turquoise													Pav_sc0000549.1_g840.1.mk	0.745478	0.525184	turquoise
				Pav_sc0000503.1_g090.1.mk	0.745446	0.567428	turquoise													Pav_sc0000503.1_g090.1.mk	0.745446	0.407715	turquoise
				Pav_sc0001797.1_g480.1.mk	0.745245	0.592522	turquoise													Pav_sc0001797.1_g480.1.mk	0.745245	0.458999	turquoise
				Pav_sc0000583.1_g650.1.mk	0.745219	0.736541	turquoise													Pav_sc0000583.1_g650.1.mk	0.745219	0.683384	turquoise
				Pav_sc0000760.1_g010.1.mk	0.745143	0.753967	turquoise													Pav_sc0000760.1_g010.1.mk	0.745143	0.650566	turquoise
				Pav_sc0000029.1_g100.1.mk	0.744866	0.846142	turquoise													Pav_sc0000029.1_g100.1.mk	0.744866	0.811588	turquoise
				Pav_sc0001663.1_g250.1.br	0.744785	0.549048	turquoise													Pav_sc0001663.1_g250.1.br	0.744785	0.543863	turquoise
				Pav_sc0009698.1_g010.1.mk	-0.744438	-0.762186	turquoise													Pav_sc0009698.1_g010.1.mk	-0.744438	-0.773731	turquoise
				Pav_sc0001582.1_g330.1.mk	0.744318	0.784793	turquoise													Pav_sc0001582.1_g330.1.mk	0.744318	0.790704	turquoise
				Pav_sc0002387.1_g430.1.mk	0.743919	0.840521	turquoise													Pav_sc0002387.1_g430.1.mk	0.743919	0.804568	turquoise
				Pav_sc0000503.1_g230.1.mk	-0.743836	-0.74166	turquoise													Pav_sc0000503.1_g230.1.mk	-0.743836	-0.72719	turquoise
				Pav_sc0001015.1_g090.1.mk	-0.743752	-0.767309	turquoise													Pav_sc0001015.1_g090.1.mk	-0.743752	-0.666903	turquoise
				Pav_sc0000054.1_g230.1.mk	0.743609	0.566282	turquoise													Pav_sc0000054.1_g230.1.mk	0.743609	0.550901	turquoise
				Pav_sc0000195.1_g690.1.mk	-0.743135	-0.839509	turquoise													Pav_sc0000195.1_g690.1.mk	-0.743135	-0.894036	turquoise
				Pav_sc0000584.1_g330.1.mk	0.743116	0.765181	turquoise													Pav_sc0000584.1_g330.1.mk	0.743116	0.760404	turquoise
				Pav_sc0001335.1_g670.1.mk	0.742787	0.480743	turquoise													Pav_sc0001335.1_g670.1.mk	0.742787	0.315266	turquoise
				Pav_sc0000848.1_g740.1.mk	-0.742778	-0.743798	turquoise													Pav_sc0000848.1_g740.1.mk	-0.742778	-0.693168	turquoise
				Pav_sc0000207.1_g1340.1.mk	0.742742	0.722175	turquoise													Pav_sc0000207.1_g1340.1.mk	0.742742	0.577549	turquoise
				Pav_sc0000052.1_g290.1.mk	0.742512	0.762417	turquoise													Pav_sc0000052.1_g290.1.mk	0.742512	0.665207	turquoise
				Pav_sc0003562.1_g200.1.mk	0.741539	0.841309	turquoise													Pav_sc0003562.1_g200.1.mk	0.741539	0.786917	turquoise
				Pav_sc0003135.1_g440.1.mk	-0.741257	-0.795648	turquoise													Pav_sc0003135.1_g440.1.mk	-0.741257	-0.74919	turquoise
				Pav_sc0004894.1_g020.1.mk	0.739475	0.682479	turquoise													Pav_sc0004894.1_g020.1.mk	0.739475	0.661151	turquoise
				Pav_sc0000103.1_g690.1.mk	0.739134	0.770532	turquoise													Pav_sc0000103.1_g690.1.mk	0.739134	0.76237	turquoise
				Pav_sc0001640.1_g350.1.mk	-0.73899	-0.843957	turquoise													Pav_sc0001640.1_g350.1.mk	-0.73899	-0.903131	turquoise
				Pav_sc0000622.1_g050.1.br	0.738473	0.709179	turquoise													Pav_sc0000622.1_g050.1.br	0.738473	0.641924	turquoise
				Pav_sc0001869.1_g290.1.br	0.738214	0.632926	turquoise													Pav_sc0001869.1_g290.1.br	0.738214	0.51069	turquoise
				Pav_sc0002451.1_g360.1.br	0.738078	0.846367	turquoise													Pav_sc0002451.1_g360.1.br	0.738078	0.762957	turquoise
				Pav_sc0000398.1_g390.1.mk	0.737683	0.808669	turquoise													Pav_sc0000398.1_g390.1.mk	0.737683	0.753626	turquoise
				Pav_sc0001405.1_g570.1.mk	0.737361	0.539372	turquoise													Pav_sc0001405.1_g570.1.mk	0.737361	0.541055	turquoise
				Pav_sc0003584.1_g060.1.br	0.737276	0.730973	turquoise													Pav_sc0003584.1_g060.1.br	0.737276	0.658259	turquoise
				Pav_sc0000877.1_g1600.1.mk	-0.736949	-0.603342	turquoise													Pav_sc0000877.1_g1600.1.mk	-0.736949	-0.429945	turquoise
				Pav_sc0008590.1_g030.1.mk	-0.736941	-0.70581	turquoise													Pav_sc0008590.1_g030.1.mk	-0.736941	-0.648102	turquoise
				Pav_sc0000589.1_g130.1.mk	-0.736893	-0.793503	turquoise													Pav_sc0000589.1_g130.1.mk	-0.736893	-0.793008	turquoise
				Pav_sc0001196.1_g2030.1.mk	-0.736528	-0.75892	turquoise													Pav_sc0001196.1_g2030.1.mk	-0.736528	-0.771438	turquoise
				Pav_sc0003614.1_g100.1.mk	0.736179	0.737224	turquoise													Pav_sc0003614.1_g100.1.mk	0.736179	0.661095	turquoise
				Pav_sc0003759.1_g050.1.mk	-0.736171	-0.694382	turquoise													Pav_sc0003759.1_g050.1.mk	-0.736171	-0.62302	turquoise
				Pav_sc0011969.1_g010.1.mk	0.735806	0.695381	turquoise													Pav_sc0011969.1_g010.1.mk	0.735806	0.695261	turquoise
				Pav_sc0000780.1_g210.1.mk	0.735597	0.810618	turquoise													Pav_sc0000780.1_g210.1.mk	0.735597	0.829522	turquoise
				Pav_sc0000129.1_g1200.1.mk	-0.735261	-0.782423	turquoise													Pav_sc0000129.1_g1200.1.mk	-0.735261	-0.792843	turquoise
				Pav_sc0002304.1_g050.1.mk	0.734986	0.766987	turquoise													Pav_sc0002304.1_g050.1.mk	0.734986	0.754946	turquoise
				Pav_sc0002567.1_g150.1.mk	-0.734856	-0.7583	turquoise													Pav_sc0002567.1_g150.1.mk	-0.734856	-0.787632	turquoise
				Pav_sc0001825.1_g230.1.mk	-0.734687	-0.775705	turquoise													Pav_sc0001825.1_g230.1.mk	-0.734687	-0.693316	turquoise
				Pav_sc0004527.1_g020.1.mk	0.734576	0.800332	turquoise													Pav_sc0004527.1_g020.1.mk	0.734576	0.816548	turquoise
				Pav_sc0000351.1_g470.1.mk	0.734346	0.544772	turquoise													Pav_sc0000351.1_g470.1.mk	0.734346	0.424782	turquoise
				Pav_sc0001080.1_g450.1.br	-0.734297	-0.774218	turquoise													Pav_sc0001080.1_g450.1.br	-0.734297	-0.819325	turquoise
				Pav_co4022557.1_g010.1.br	0.734109	0.829724	turquoise													Pav_co4022557.1_g010.1.br	0.734109	0.781382	turquoise
				Pav_sc0000780.1_g450.1.mk	-0.733737	-0.78404	turquoise													Pav_sc0000780.1_g450.1.mk	-0.733737	-0.812102	turquoise
				Pav_sc0000412.1_g240.1.mk	0.733589	0.716899	turquoise													Pav_sc0000412.1_g240.1.mk	0.733589	0.736837	turquoise
				Pav_sc0000028.1_g570.1.mk	-0.733532	-0.744875	turquoise													Pav_sc0000028.1_g570.1.mk	-0.733532	-0.675618	turquoise
				Pav_sc0008544.1_g020.1.mk	0.733484	0.6183	turquoise													Pav_sc0008544.1_g020.1.mk	0.733484	0.493135	turquoise
				Pav_sc0000027.1_g340.1.mk	-0.733474	-0.803888	turquoise													Pav_sc0000027.1_g340.1.mk	-0.733474	-0.801749	turquoise
				Pav_sc0000909.1_g520.1.mk	-0.733425	-0.725071	turquoise													Pav_sc0000909.1_g520.1.mk	-0.733425	-0.724932	turquoise
				Pav_sc0000069.1_g840.1.mk	-0.733285	-0.789651	turquoise													Pav_sc0000069.1_g840.1.mk	-0.733285	-0.833822	turquoise
				novel.748	0.732946	0.668201	turquoise													novel.748	0.732946	0.643347	turquoise
				Pav_sc0004188.1_g080.1.mk	0.732425	0.777069	turquoise													Pav_sc0004188.1_g080.1.mk	0.732425	0.771494	turquoise
				Pav_sc0000593.1_g020.1.mk	-0.732164	-0.720799	turquoise													Pav_sc0000593.1_g020.1.mk	-0.732164	-0.684509	turquoise
				Pav_sc0000890.1_g1200.1.mk	0.730816	0.502896	turquoise													Pav_sc0000890.1_g1200.1.mk	0.730816	0.441057	turquoise
				Pav_sc0000451.1_g050.1.br	0.730651	0.640473	turquoise													Pav_sc0000451.1_g050.1.br	0.730651	0.505976	turquoise
				Pav_sc0009945.1_g020.1.mk	-0.729681	-0.75256	turquoise													Pav_sc0009945.1_g020.1.mk	-0.729681	-0.775786	turquoise
				Pav_sc0002286.1_g010.1.mk	-0.728771	-0.688634	turquoise													Pav_sc0002286.1_g010.1.mk	-0.728771	-0.723729	turquoise
				Pav_sc0001183.1_g410.1.mk	0.728626	0.740234	turquoise													Pav_sc0001183.1_g410.1.mk	0.728626	0.640884	turquoise
				Pav_sc0000675.1_g1280.1.mk	-0.728573	-0.792004	turquoise													Pav_sc0000675.1_g1280.1.mk	-0.728573	-0.811821	turquoise
				Pav_sc0001215.1_g270.1.mk	0.728029	0.603709	turquoise													Pav_sc0001215.1_g270.1.mk	0.728029	0.493635	turquoise
				Pav_sc0000862.1_g260.1.br	0.727662	0.866742	turquoise													Pav_sc0000862.1_g260.1.br	0.727662	0.856189	turquoise
				Pav_sc0000326.1_g500.1.mk	0.727554	0.685476	turquoise													Pav_sc0000326.1_g500.1.mk	0.727554	0.590127	turquoise
				Pav_sc0002514.1_g130.1.mk	-0.726895	-0.818184	turquoise													Pav_sc0002514.1_g130.1.mk	-0.726895	-0.8573	turquoise
				Pav_sc0000484.1_g470.1.mk	-0.72689	-0.660732	turquoise													Pav_sc0000484.1_g470.1.mk	-0.72689	-0.56599	turquoise
				Pav_sc0000789.1_g090.1.mk	-0.72652	-0.576116	turquoise													Pav_sc0000789.1_g090.1.mk	-0.72652	-0.394165	turquoise
				Pav_sc0000203.1_g120.1.mk	0.726519	0.658831	turquoise													Pav_sc0000203.1_g120.1.mk	0.726519	0.60281	turquoise
				Pav_sc0000146.1_g680.1.mk	-0.726418	-0.766073	turquoise													Pav_sc0000146.1_g680.1.mk	-0.726418	-0.802876	turquoise
				Pav_co4002539.1_g010.1.mk	0.726093	0.82209	turquoise													Pav_co4002539.1_g010.1.mk	0.726093	0.767957	turquoise
				Pav_sc0000581.1_g060.1.mk	-0.725807	-0.820394	turquoise													Pav_sc0000581.1_g060.1.mk	-0.725807	-0.880056	turquoise
				Pav_sc0001126.1_g220.1.br	0.725732	0.541398	turquoise													Pav_sc0001126.1_g220.1.br	0.725732	0.382161	turquoise
				Pav_sc0000503.1_g150.1.mk	-0.725178	-0.62789	turquoise													Pav_sc0000503.1_g150.1.mk	-0.725178	-0.517715	turquoise
				Pav_sc0000638.1_g880.1.mk	0.724743	0.486112	turquoise													Pav_sc0000638.1_g880.1.mk	0.724743	0.439469	turquoise
				Pav_sc0000631.1_g160.1.mk	-0.72471	-0.778709	turquoise													Pav_sc0000631.1_g160.1.mk	-0.72471	-0.827176	turquoise
				Pav_sc0000176.1_g190.1.mk	0.724642	0.635585	turquoise													Pav_sc0000176.1_g190.1.mk	0.724642	0.504815	turquoise
				Pav_sc0001251.1_g130.1.mk	-0.724258	-0.65836	turquoise													Pav_sc0001251.1_g130.1.mk	-0.724258	-0.538436	turquoise
				Pav_sc0000714.1_g350.1.br	0.723461	0.550389	turquoise													Pav_sc0000714.1_g350.1.br	0.723461	0.51536	turquoise
				Pav_sc0007253.1_g100.1.mk	-0.723058	-0.75939	turquoise													Pav_sc0007253.1_g100.1.mk	-0.723058	-0.750012	turquoise
				Pav_sc0000789.1_g110.1.mk	-0.722818	-0.771394	turquoise													Pav_sc0000789.1_g110.1.mk	-0.722818	-0.783734	turquoise
				Pav_sc0001280.1_g170.1.br	0.722816	0.777281	turquoise													Pav_sc0001280.1_g170.1.br	0.722816	0.68165	turquoise
				Pav_sc0000373.1_g420.1.mk	0.722742	0.536507	turquoise													Pav_sc0000373.1_g420.1.mk	0.722742	0.372547	turquoise
				Pav_sc0001416.1_g140.1.mk	0.72271	0.521687	turquoise													Pav_sc0001416.1_g140.1.mk	0.72271	0.35302	turquoise
				Pav_sc0000042.1_g380.1.mk	0.722704	0.529251	turquoise													Pav_sc0000042.1_g380.1.mk	0.722704	0.375791	turquoise
				Pav_sc0001674.1_g010.1.mk	-0.72195	-0.72463	turquoise													Pav_sc0001674.1_g010.1.mk	-0.72195	-0.723289	turquoise
				Pav_sc0000129.1_g220.1.mk	0.721846	0.826491	turquoise													Pav_sc0000129.1_g220.1.mk	0.721846	0.758247	turquoise
				Pav_sc0000623.1_g010.1.br	0.721823	0.700697	turquoise													Pav_sc0000623.1_g010.1.br	0.721823	0.692939	turquoise
				Pav_sc0000174.1_g570.1.br	-0.721656	-0.739748	turquoise													Pav_sc0000174.1_g570.1.br	-0.721656	-0.741145	turquoise
				Pav_sc0000383.1_g680.1.mk	-0.721576	-0.677234	turquoise													Pav_sc0000383.1_g680.1.mk	-0.721576	-0.613214	turquoise
				Pav_sc0006098.1_g170.1.mk	0.721263	0.884679	turquoise													Pav_sc0006098.1_g170.1.mk	0.721263	0.780766	turquoise
				Pav_sc0000157.1_g130.1.mk	0.72118	0.709921	turquoise													Pav_sc0000157.1_g130.1.mk	0.72118	0.714324	turquoise
				Pav_sc0001006.1_g130.1.mk	-0.720838	-0.711535	turquoise													Pav_sc0001006.1_g130.1.mk	-0.720838	-0.656784	turquoise
				Pav_sc0001211.1_g030.1.mk	-0.720642	-0.727828	turquoise													Pav_sc0001211.1_g030.1.mk	-0.720642	-0.670683	turquoise
				Pav_sc0001405.1_g1960.1.br	0.720406	0.854919	turquoise													Pav_sc0001405.1_g1960.1.br	0.720406	0.78445	turquoise
				Pav_sc0005215.1_g010.1.mk	0.720389	0.733704	turquoise													Pav_sc0005215.1_g010.1.mk	0.720389	0.633701	turquoise
				Pav_sc0001020.1_g160.1.mk	-0.720379	-0.791757	turquoise													Pav_sc0001020.1_g160.1.mk	-0.720379	-0.825674	turquoise
				Pav_sc0000348.1_g100.1.br	0.720342	0.603393	turquoise													Pav_sc0000348.1_g100.1.br	0.720342	0.642898	turquoise
				Pav_sc0005677.1_g020.1.br	0.720211	0.586418	turquoise													Pav_sc0005677.1_g020.1.br	0.720211	0.52135	turquoise
				Pav_sc0000580.1_g090.1.mk	0.720001	0.854146	turquoise													Pav_sc0000580.1_g090.1.mk	0.720001	0.813855	turquoise
				Pav_sc0001181.1_g1020.1.mk	0.719981	0.84149	turquoise													Pav_sc0001181.1_g1020.1.mk	0.719981	0.829176	turquoise
				Pav_sc0011987.1_g020.1.mk	0.719521	0.813867	turquoise													Pav_sc0011987.1_g020.1.mk	0.719521	0.680045	turquoise
				novel.38	0.71927	0.677094	turquoise													novel.38	0.71927	0.593337	turquoise
				Pav_sc0000305.1_g100.1.mk	0.719147	0.434782	turquoise													Pav_sc0000305.1_g100.1.mk	0.719147	0.299734	turquoise
				Pav_sc0000012.1_g020.1.br	0.718957	0.761913	turquoise													Pav_sc0000012.1_g020.1.br	0.718957	0.608917	turquoise
				Pav_sc0000480.1_g140.1.mk	0.718318	0.800631	turquoise													Pav_sc0000480.1_g140.1.mk	0.718318	0.683829	turquoise
				Pav_sc0000549.1_g490.1.mk	0.718231	0.732346	turquoise													Pav_sc0000549.1_g490.1.mk	0.718231	0.688067	turquoise
				Pav_sc0000659.1_g180.1.mk	-0.717929	-0.694655	turquoise													Pav_sc0000659.1_g180.1.mk	-0.717929	-0.661729	turquoise
				Pav_sc0000383.1_g1260.1.mk	0.717911	0.574056	turquoise													Pav_sc0000383.1_g1260.1.mk	0.717911	0.557787	turquoise
				Pav_sc0004477.1_g020.1.mk	-0.717771	-0.784398	turquoise													Pav_sc0004477.1_g020.1.mk	-0.717771	-0.865112	turquoise
				Pav_sc0002515.1_g020.1.mk	0.717237	0.718338	turquoise													Pav_sc0002515.1_g020.1.mk	0.717237	0.608965	turquoise
				Pav_sc0000581.1_g070.1.mk	0.716642	0.565973	turquoise													Pav_sc0000581.1_g070.1.mk	0.716642	0.447582	turquoise
				Pav_sc0000027.1_g410.1.br	0.716339	0.826645	turquoise													Pav_sc0000027.1_g410.1.br	0.716339	0.760115	turquoise
				Pav_sc0000044.1_g330.1.mk	0.715749	0.725207	turquoise													Pav_sc0000044.1_g330.1.mk	0.715749	0.55171	turquoise
				Pav_sc0004547.1_g040.1.br	-0.715465	-0.705171	turquoise													Pav_sc0004547.1_g040.1.br	-0.715465	-0.67028	turquoise
				Pav_sc0000296.1_g110.1.mk	-0.715461	-0.709086	turquoise													Pav_sc0000296.1_g110.1.mk	-0.715461	-0.665553	turquoise
				Pav_sc0000212.1_g1910.1.mk	0.715389	0.479127	turquoise													Pav_sc0000212.1_g1910.1.mk	0.715389	0.326069	turquoise
				Pav_sc0000212.1_g280.1.mk	0.715313	0.814027	turquoise													Pav_sc0000212.1_g280.1.mk	0.715313	0.788521	turquoise
				novel.1329	-0.715099	-0.778474	turquoise													novel.1329	-0.715099	-0.824517	turquoise
				Pav_sc0000843.1_g930.1.mk	0.714883	0.778564	turquoise													Pav_sc0000843.1_g930.1.mk	0.714883	0.656843	turquoise
				Pav_sc0002401.1_g330.1.mk	0.714696	0.660096	turquoise													Pav_sc0002401.1_g330.1.mk	0.714696	0.747277	turquoise
				Pav_sc0000216.1_g520.1.mk	-0.714539	-0.651404	turquoise													Pav_sc0000216.1_g520.1.mk	-0.714539	-0.541069	turquoise
				Pav_sc0001106.1_g520.1.mk	0.714503	0.765166	turquoise													Pav_sc0001106.1_g520.1.mk	0.714503	0.745471	turquoise
				Pav_sc0001009.1_g380.1.mk	0.714425	0.74092	turquoise													Pav_sc0001009.1_g380.1.mk	0.714425	0.66393	turquoise
				Pav_sc0003682.1_g120.1.br	0.714277	0.815403	turquoise													Pav_sc0003682.1_g120.1.br	0.714277	0.79025	turquoise
				Pav_sc0000024.1_g570.1.br	0.713748	0.734172	turquoise													Pav_sc0000024.1_g570.1.br	0.713748	0.759308	turquoise
				novel.1045	-0.71344	-0.747516	turquoise													novel.1045	-0.71344	-0.753563	turquoise
				Pav_sc0000084.1_g560.1.mk	0.713273	0.62923	turquoise													Pav_sc0000084.1_g560.1.mk	0.713273	0.493173	turquoise
				Pav_sc0000103.1_g1620.1.mk	-0.713251	-0.643468	turquoise													Pav_sc0000103.1_g1620.1.mk	-0.713251	-0.516348	turquoise
				Pav_sc0000100.1_g230.1.br	0.713007	0.501595	turquoise													Pav_sc0000100.1_g230.1.br	0.713007	0.41855	turquoise
				Pav_sc0001794.1_g260.1.mk	-0.712848	-0.747401	turquoise													Pav_sc0001794.1_g260.1.mk	-0.712848	-0.733182	turquoise
				Pav_sc0000998.1_g460.1.mk	0.712124	0.843665	turquoise													Pav_sc0000998.1_g460.1.mk	0.712124	0.783439	turquoise
				Pav_sc0003823.1_g110.1.mk	-0.711226	-0.755116	turquoise													Pav_sc0003823.1_g110.1.mk	-0.711226	-0.761906	turquoise
				Pav_sc0002986.1_g210.1.mk	-0.710565	-0.752412	turquoise													Pav_sc0002986.1_g210.1.mk	-0.710565	-0.732892	turquoise
				Pav_sc0002286.1_g180.1.mk	-0.710544	-0.679385	turquoise													Pav_sc0002286.1_g180.1.mk	-0.710544	-0.634287	turquoise
				novel.156	-0.710442	-0.646284	turquoise													novel.156	-0.710442	-0.557848	turquoise
				Pav_co4009049.1_g010.1.br	-0.710378	-0.750141	turquoise													Pav_co4009049.1_g010.1.br	-0.710378	-0.717615	turquoise
				Pav_sc0000624.1_g2070.1.mk	0.70996	0.781159	turquoise													Pav_sc0000624.1_g2070.1.mk	0.70996	0.779232	turquoise
				Pav_sc0012519.1_g010.1.mk	0.709935	0.682398	turquoise													Pav_sc0012519.1_g010.1.mk	0.709935	0.63486	turquoise
				Pav_sc0000554.1_g070.1.mk	-0.70979	-0.71011	turquoise													Pav_sc0000554.1_g070.1.mk	-0.70979	-0.696196	turquoise
				Pav_sc0000373.1_g580.1.mk	0.708959	0.849229	turquoise													Pav_sc0000373.1_g580.1.mk	0.708959	0.80312	turquoise
				Pav_sc0000009.1_g590.1.br	-0.708519	-0.650795	turquoise													Pav_sc0000009.1_g590.1.br	-0.708519	-0.531934	turquoise
				Pav_sc0000212.1_g430.1.mk	-0.707798	-0.586282	turquoise													Pav_sc0000212.1_g430.1.mk	-0.707798	-0.420567	turquoise
				Pav_sc0000847.1_g070.1.mk	0.707191	0.730479	turquoise													Pav_sc0000847.1_g070.1.mk	0.707191	0.65236	turquoise
				Pav_sc0000354.1_g720.1.mk	-0.7067	-0.712221	turquoise													Pav_sc0000354.1_g720.1.mk	-0.7067	-0.74553	turquoise
				Pav_sc0000700.1_g870.1.mk	-0.706681	-0.644773	turquoise													Pav_sc0000700.1_g870.1.mk	-0.706681	-0.524503	turquoise
				Pav_sc0000464.1_g690.1.mk	-0.706676	-0.784891	turquoise													Pav_sc0000464.1_g690.1.mk	-0.706676	-0.827508	turquoise
				Pav_sc0000848.1_g840.1.mk	0.706554	0.477974	turquoise													Pav_sc0000848.1_g840.1.mk	0.706554	0.371618	turquoise
				Pav_sc0000027.1_g400.1.mk	0.706419	0.825798	turquoise													Pav_sc0000027.1_g400.1.mk	0.706419	0.729029	turquoise
				Pav_sc0006737.1_g010.1.mk	-0.706297	-0.751599	turquoise													Pav_sc0006737.1_g010.1.mk	-0.706297	-0.77436	turquoise
				Pav_sc0000259.1_g100.1.mk	0.706267	0.697836	turquoise													Pav_sc0000259.1_g100.1.mk	0.706267	0.621156	turquoise
				Pav_sc0001305.1_g680.1.mk	0.706017	0.539139	turquoise													Pav_sc0001305.1_g680.1.mk	0.706017	0.45135	turquoise
				Pav_sc0004314.1_g070.1.mk	-0.705721	-0.702084	turquoise													Pav_sc0004314.1_g070.1.mk	-0.705721	-0.678046	turquoise
				Pav_sc0004175.1_g010.1.mk	0.705579	0.725964	turquoise													Pav_sc0004175.1_g010.1.mk	0.705579	0.598659	turquoise
				Pav_sc0000212.1_g1240.1.mk	0.705441	0.876387	turquoise													Pav_sc0000212.1_g1240.1.mk	0.705441	0.822172	turquoise
				Pav_sc0000600.1_g520.1.mk	0.704619	0.679884	turquoise													Pav_sc0000600.1_g520.1.mk	0.704619	0.582435	turquoise
				Pav_sc0001215.1_g030.1.mk	0.704286	0.830554	turquoise													Pav_sc0001215.1_g030.1.mk	0.704286	0.752592	turquoise
				novel.117	-0.704081	-0.779443	turquoise													novel.117	-0.704081	-0.795851	turquoise
				Pav_sc0000130.1_g250.1.mk	-0.702838	-0.704333	turquoise													Pav_sc0000130.1_g250.1.mk	-0.702838	-0.685718	turquoise
				Pav_sc0002424.1_g030.1.mk	0.702437	0.6271	turquoise													Pav_sc0002424.1_g030.1.mk	0.702437	0.61544	turquoise
				Pav_sc0001341.1_g730.1.br	-0.702308	-0.736272	turquoise													Pav_sc0001341.1_g730.1.br	-0.702308	-0.728123	turquoise
				Pav_sc0011549.1_g010.1.mk	0.70217	0.854491	turquoise													Pav_sc0011549.1_g010.1.mk	0.70217	0.764178	turquoise
				Pav_sc0001925.1_g120.1.mk	0.701764	0.655563	turquoise													Pav_sc0001925.1_g120.1.mk	0.701764	0.565741	turquoise
				Pav_sc0001183.1_g270.1.mk	0.699429	0.548359	turquoise													Pav_sc0001183.1_g270.1.mk	0.699429	0.548014	turquoise
				Pav_sc0005787.1_g100.1.mk	0.699426	0.586174	turquoise													Pav_sc0005787.1_g100.1.mk	0.699426	0.538851	turquoise
				Pav_sc0000575.1_g180.1.mk	0.699266	0.522772	turquoise													Pav_sc0000575.1_g180.1.mk	0.699266	0.420821	turquoise
				Pav_sc0000254.1_g1540.1.mk	0.699225	0.721286	turquoise													Pav_sc0000254.1_g1540.1.mk	0.699225	0.681884	turquoise
				Pav_sc0000679.1_g560.1.br	-0.699012	-0.700638	turquoise													Pav_sc0000679.1_g560.1.br	-0.699012	-0.690589	turquoise
				Pav_sc0005470.1_g010.1.mk	-0.698818	-0.802033	turquoise													Pav_sc0005470.1_g010.1.mk	-0.698818	-0.834967	turquoise
				Pav_sc0000617.1_g490.1.mk	-0.698704	-0.708858	turquoise													Pav_sc0000617.1_g490.1.mk	-0.698704	-0.660753	turquoise
				Pav_sc0000689.1_g540.1.mk	0.698497	0.799139	turquoise													Pav_sc0000689.1_g540.1.mk	0.698497	0.681366	turquoise
				Pav_sc0000024.1_g270.1.mk	0.698251	0.743067	turquoise													Pav_sc0000024.1_g270.1.mk	0.698251	0.703632	turquoise
				Pav_sc0000567.1_g390.1.mk	0.698166	0.555096	turquoise													Pav_sc0000567.1_g390.1.mk	0.698166	0.41281	turquoise
				Pav_sc0000449.1_g490.1.mk	0.697691	0.531248	turquoise													Pav_sc0000449.1_g490.1.mk	0.697691	0.427601	turquoise
				Pav_sc0002060.1_g040.1.mk	0.697234	0.77733	turquoise													Pav_sc0002060.1_g040.1.mk	0.697234	0.80379	turquoise
				Pav_sc0000586.1_g800.1.mk	0.6969	0.789746	turquoise													Pav_sc0000586.1_g800.1.mk	0.6969	0.661656	turquoise
				Pav_sc0000524.1_g240.1.mk	-0.696472	-0.782862	turquoise													Pav_sc0000524.1_g240.1.mk	-0.696472	-0.780594	turquoise
				Pav_sc0000554.1_g2030.1.mk	-0.696283	-0.762756	turquoise													Pav_sc0000554.1_g2030.1.mk	-0.696283	-0.793248	turquoise
				novel.634	-0.696037	-0.752268	turquoise													novel.634	-0.696037	-0.771558	turquoise
				Pav_sc0000754.1_g390.1.mk	0.695875	0.821708	turquoise													Pav_sc0000754.1_g390.1.mk	0.695875	0.741649	turquoise
				Pav_sc0009568.1_g010.1.br	0.695279	0.515022	turquoise													Pav_sc0009568.1_g010.1.br	0.695279	0.488048	turquoise
				Pav_sc0010060.1_g010.1.mk	0.69483	0.461143	turquoise													Pav_sc0010060.1_g010.1.mk	0.69483	0.348247	turquoise
				Pav_sc0000095.1_g1000.1.mk	0.694174	0.792372	turquoise													Pav_sc0000095.1_g1000.1.mk	0.694174	0.783608	turquoise
				Pav_sc0003174.1_g080.1.mk	-0.694089	-0.689967	turquoise													Pav_sc0003174.1_g080.1.mk	-0.694089	-0.63332	turquoise
				Pav_sc0000370.1_g260.1.mk	-0.693633	-0.738068	turquoise													Pav_sc0000370.1_g260.1.mk	-0.693633	-0.751295	turquoise
				Pav_sc0000910.1_g690.1.mk	0.692639	0.713696	turquoise													Pav_sc0000910.1_g690.1.mk	0.692639	0.755571	turquoise
				Pav_sc0001411.1_g180.1.mk	-0.692299	-0.773781	turquoise													Pav_sc0001411.1_g180.1.mk	-0.692299	-0.813478	turquoise
				Pav_sc0000998.1_g450.1.br	0.691819	0.794791	turquoise													Pav_sc0000998.1_g450.1.br	0.691819	0.743271	turquoise
				Pav_sc0001411.1_g190.1.mk	-0.691818	-0.716471	turquoise													Pav_sc0001411.1_g190.1.mk	-0.691818	-0.631173	turquoise
				Pav_sc0002828.1_g110.1.mk	-0.691805	-0.779867	turquoise													Pav_sc0002828.1_g110.1.mk	-0.691805	-0.85053	turquoise
				Pav_sc0006999.1_g040.1.mk	-0.690886	-0.726499	turquoise													Pav_sc0006999.1_g040.1.mk	-0.690886	-0.794385	turquoise
				novel.1118	0.690722	0.664261	turquoise													novel.1118	0.690722	0.573566	turquoise
				Pav_sc0001088.1_g130.1.mk	0.690609	0.448103	turquoise													Pav_sc0001088.1_g130.1.mk	0.690609	0.381349	turquoise
				Pav_sc0000862.1_g350.1.mk	-0.690551	-0.746059	turquoise													Pav_sc0000862.1_g350.1.mk	-0.690551	-0.69707	turquoise
				Pav_sc0000051.1_g450.1.mk	0.690385	0.504662	turquoise													Pav_sc0000051.1_g450.1.mk	0.690385	0.350914	turquoise
				Pav_sc0001323.1_g780.1.mk	0.689617	0.423901	turquoise													Pav_sc0001323.1_g780.1.mk	0.689617	0.354481	turquoise
				Pav_sc0002430.1_g020.1.mk	0.689584	0.721335	turquoise													Pav_sc0002430.1_g020.1.mk	0.689584	0.652194	turquoise
				Pav_sc0001431.1_g030.1.mk	0.689444	0.76492	turquoise													Pav_sc0001431.1_g030.1.mk	0.689444	0.617252	turquoise
				Pav_sc0000354.1_g520.1.mk	0.689062	0.726645	turquoise													Pav_sc0000354.1_g520.1.mk	0.689062	0.731321	turquoise
				Pav_sc0002828.1_g430.1.mk	0.688268	0.555797	turquoise													Pav_sc0002828.1_g430.1.mk	0.688268	0.436818	turquoise
				Pav_sc0000184.1_g020.1.mk	0.687963	0.546021	turquoise													Pav_sc0000184.1_g020.1.mk	0.687963	0.4079	turquoise
				Pav_sc0000543.1_g420.1.mk	-0.687753	-0.67648	turquoise													Pav_sc0000543.1_g420.1.mk	-0.687753	-0.526843	turquoise
				Pav_sc0001797.1_g620.1.mk	0.686912	0.561224	turquoise													Pav_sc0001797.1_g620.1.mk	0.686912	0.483014	turquoise
				novel.71	0.686899	0.738779	turquoise													novel.71	0.686899	0.672478	turquoise
				Pav_sc0000755.1_g040.1.mk	0.686775	0.753956	turquoise													Pav_sc0000755.1_g040.1.mk	0.686775	0.681749	turquoise
				Pav_sc0001580.1_g270.1.mk	0.686443	0.763384	turquoise													Pav_sc0001580.1_g270.1.mk	0.686443	0.663874	turquoise
				Pav_sc0007574.1_g010.1.mk	-0.68577	-0.716554	turquoise													Pav_sc0007574.1_g010.1.mk	-0.68577	-0.675536	turquoise
				Pav_sc0003835.1_g260.1.mk	-0.684825	-0.742571	turquoise													Pav_sc0003835.1_g260.1.mk	-0.684825	-0.735755	turquoise
				Pav_sc0006322.1_g050.1.mk	0.684477	0.572909	turquoise													Pav_sc0006322.1_g050.1.mk	0.684477	0.444958	turquoise
				Pav_sc0000410.1_g360.1.mk	0.684191	0.463457	turquoise													Pav_sc0000410.1_g360.1.mk	0.684191	0.336512	turquoise
				Pav_sc0001963.1_g430.1.mk	-0.683819	-0.566957	turquoise													Pav_sc0001963.1_g430.1.mk	-0.683819	-0.429806	turquoise
				Pav_sc0000500.1_g350.1.mk	-0.683519	-0.751519	turquoise													Pav_sc0000500.1_g350.1.mk	-0.683519	-0.823276	turquoise
				Pav_sc0002009.1_g360.1.mk	0.683457	0.817949	turquoise													Pav_sc0002009.1_g360.1.mk	0.683457	0.731602	turquoise
				Pav_sc0002582.1_g080.1.mk	0.682863	0.696847	turquoise													Pav_sc0002582.1_g080.1.mk	0.682863	0.554573	turquoise
				Pav_sc0000221.1_g080.1.mk	0.682507	0.822614	turquoise													Pav_sc0000221.1_g080.1.mk	0.682507	0.758383	turquoise
				Pav_co4045625.1_g010.1.mk	0.681639	0.725266	turquoise													Pav_co4045625.1_g010.1.mk	0.681639	0.62918	turquoise
				Pav_sc0000484.1_g150.1.mk	-0.681384	-0.7447	turquoise													Pav_sc0000484.1_g150.1.mk	-0.681384	-0.761839	turquoise
				Pav_sc0000029.1_g140.1.mk	-0.681208	-0.707145	turquoise													Pav_sc0000029.1_g140.1.mk	-0.681208	-0.679856	turquoise
				Pav_sc0000869.1_g550.1.br	0.680676	0.663032	turquoise													Pav_sc0000869.1_g550.1.br	0.680676	0.615843	turquoise
				Pav_sc0001205.1_g070.1.mk	0.679958	0.44153	turquoise													Pav_sc0001205.1_g070.1.mk	0.679958	0.285401	turquoise
				novel.920	0.679778	0.826992	turquoise													novel.920	0.679778	0.754415	turquoise
				Pav_sc0001909.1_g040.1.br	0.679542	0.810165	turquoise													Pav_sc0001909.1_g040.1.br	0.679542	0.743046	turquoise
				Pav_sc0000554.1_g2270.1.mk	0.679176	0.707498	turquoise													Pav_sc0000554.1_g2270.1.mk	0.679176	0.65419	turquoise
				novel.183	-0.678992	-0.671879	turquoise													novel.183	-0.678992	-0.608872	turquoise
				Pav_sc0000764.1_g320.1.mk	0.678579	0.383074	turquoise													Pav_sc0000764.1_g320.1.mk	0.678579	0.281232	turquoise
				novel.1079	0.677578	0.681578	turquoise													novel.1079	0.677578	0.60409	turquoise
				Pav_sc0001040.1_g210.1.br	0.677347	0.559548	turquoise													Pav_sc0001040.1_g210.1.br	0.677347	0.559386	turquoise
				Pav_sc0001305.1_g520.1.mk	0.676847	0.710985	turquoise													Pav_sc0001305.1_g520.1.mk	0.676847	0.625284	turquoise
				Pav_sc0001710.1_g1460.1.mk	-0.67663	-0.763859	turquoise													Pav_sc0001710.1_g1460.1.mk	-0.67663	-0.786022	turquoise
				Pav_sc0000428.1_g830.1.mk	-0.676125	-0.747002	turquoise													Pav_sc0000428.1_g830.1.mk	-0.676125	-0.771045	turquoise
				Pav_sc0000099.1_g930.1.mk	-0.673185	-0.680566	turquoise													Pav_sc0000099.1_g930.1.mk	-0.673185	-0.652729	turquoise
				Pav_sc0000383.1_g110.1.mk	-0.673104	-0.760238	turquoise													Pav_sc0000383.1_g110.1.mk	-0.673104	-0.809357	turquoise
				Pav_sc0000254.1_g1240.1.mk	-0.672613	-0.647472	turquoise													Pav_sc0000254.1_g1240.1.mk	-0.672613	-0.604732	turquoise
				Pav_sc0000037.1_g180.1.mk	-0.672213	-0.685924	turquoise													Pav_sc0000037.1_g180.1.mk	-0.672213	-0.694685	turquoise
				Pav_sc0000893.1_g620.1.mk	0.672148	0.693918	turquoise													Pav_sc0000893.1_g620.1.mk	0.672148	0.551969	turquoise
				Pav_sc0000244.1_g070.1.mk	0.672131	0.803923	turquoise													Pav_sc0000244.1_g070.1.mk	0.672131	0.74671	turquoise
				Pav_sc0001405.1_g1640.1.mk	0.671737	0.867825	turquoise													Pav_sc0001405.1_g1640.1.mk	0.671737	0.889451	turquoise
				Pav_sc0001248.1_g020.1.mk	-0.671724	-0.736345	turquoise													Pav_sc0001248.1_g020.1.mk	-0.671724	-0.754169	turquoise
				Pav_sc0003434.1_g020.1.mk	0.670964	0.71341	turquoise													Pav_sc0003434.1_g020.1.mk	0.670964	0.644497	turquoise
				Pav_sc0000638.1_g680.1.mk	-0.67068	-0.76884	turquoise													Pav_sc0000638.1_g680.1.mk	-0.67068	-0.854401	turquoise
				Pav_sc0000103.1_g1100.1.mk	0.670611	0.617223	turquoise													Pav_sc0000103.1_g1100.1.mk	0.670611	0.616762	turquoise
				Pav_sc0000184.1_g500.1.mk	-0.670319	-0.755377	turquoise													Pav_sc0000184.1_g500.1.mk	-0.670319	-0.71785	turquoise
				Pav_sc0000557.1_g1110.1.br	-0.670168	-0.646521	turquoise													Pav_sc0000557.1_g1110.1.br	-0.670168	-0.752483	turquoise
				Pav_sc0001275.1_g270.1.br	-0.668798	-0.710242	turquoise													Pav_sc0001275.1_g270.1.br	-0.668798	-0.765422	turquoise
				Pav_sc0001340.1_g090.1.mk	0.668795	0.747611	turquoise													Pav_sc0001340.1_g090.1.mk	0.668795	0.697095	turquoise
				Pav_sc0000233.1_g060.1.mk	-0.668175	-0.718884	turquoise													Pav_sc0000233.1_g060.1.mk	-0.668175	-0.73541	turquoise
				Pav_sc0000220.1_g1270.1.mk	0.666801	0.687239	turquoise													Pav_sc0000220.1_g1270.1.mk	0.666801	0.73475	turquoise
				Pav_sc0000747.1_g300.1.mk	0.666743	0.401868	turquoise													Pav_sc0000747.1_g300.1.mk	0.666743	0.321037	turquoise
				Pav_sc0006414.1_g010.1.mk	-0.666091	-0.739589	turquoise													Pav_sc0006414.1_g010.1.mk	-0.666091	-0.769127	turquoise
				Pav_sc0000493.1_g010.1.mk	0.665929	0.583493	turquoise													Pav_sc0000493.1_g010.1.mk	0.665929	0.505554	turquoise
				Pav_sc0006088.1_g030.1.mk	0.665544	0.652985	turquoise													Pav_sc0006088.1_g030.1.mk	0.665544	0.605098	turquoise
				Pav_sc0000855.1_g030.1.mk	0.665497	0.613041	turquoise													Pav_sc0000855.1_g030.1.mk	0.665497	0.59557	turquoise
				Pav_sc0001411.1_g450.1.mk	-0.665344	-0.762547	turquoise													Pav_sc0001411.1_g450.1.mk	-0.665344	-0.769669	turquoise
				Pav_sc0000598.1_g740.1.mk	0.665269	0.413147	turquoise													Pav_sc0000598.1_g740.1.mk	0.665269	0.266762	turquoise
				Pav_sc0001124.1_g410.1.mk	0.664668	0.780105	turquoise													Pav_sc0001124.1_g410.1.mk	0.664668	0.670523	turquoise
				Pav_sc0000220.1_g260.1.mk	0.664469	0.430411	turquoise													Pav_sc0000220.1_g260.1.mk	0.664469	0.268679	turquoise
				Pav_sc0000848.1_g760.1.mk	0.664351	0.739274	turquoise													Pav_sc0000848.1_g760.1.mk	0.664351	0.747479	turquoise
				Pav_sc0001084.1_g460.1.mk	-0.664187	-0.70347	turquoise													Pav_sc0001084.1_g460.1.mk	-0.664187	-0.716981	turquoise
				Pav_co4011033.1_g010.1.mk	-0.663404	-0.713565	turquoise													Pav_co4011033.1_g010.1.mk	-0.663404	-0.751528	turquoise
				Pav_sc0000138.1_g390.1.mk	0.662591	0.5014	turquoise													Pav_sc0000138.1_g390.1.mk	0.662591	0.502361	turquoise
				Pav_sc0000359.1_g230.1.mk	0.662123	0.506602	turquoise													Pav_sc0000359.1_g230.1.mk	0.662123	0.376756	turquoise
				Pav_sc0000377.1_g310.1.br	0.66203	0.558413	turquoise													Pav_sc0000377.1_g310.1.br	0.66203	0.5447	turquoise
				Pav_sc0002179.1_g110.1.br	0.661881	0.624418	turquoise													Pav_sc0002179.1_g110.1.br	0.661881	0.495647	turquoise
				Pav_sc0002828.1_g300.1.mk	-0.661865	-0.706501	turquoise													Pav_sc0002828.1_g300.1.mk	-0.661865	-0.730145	turquoise
				Pav_sc0000108.1_g280.1.mk	0.661715	0.560472	turquoise													Pav_sc0000108.1_g280.1.mk	0.661715	0.51556	turquoise
				Pav_sc0000823.1_g600.1.mk	0.661264	0.741017	turquoise													Pav_sc0000823.1_g600.1.mk	0.661264	0.607412	turquoise
				Pav_sc0000591.1_g220.1.mk	0.661235	0.69122	turquoise													Pav_sc0000591.1_g220.1.mk	0.661235	0.592892	turquoise
				Pav_sc0008499.1_g010.1.br	0.660926	0.680719	turquoise													Pav_sc0008499.1_g010.1.br	0.660926	0.584074	turquoise
				Pav_sc0000099.1_g940.1.mk	-0.660303	-0.651336	turquoise													Pav_sc0000099.1_g940.1.mk	-0.660303	-0.632073	turquoise
				Pav_sc0000759.1_g310.1.mk	0.660232	0.784653	turquoise													Pav_sc0000759.1_g310.1.mk	0.660232	0.723481	turquoise
				Pav_sc0001700.1_g010.1.mk	0.659634	0.682241	turquoise													Pav_sc0001700.1_g010.1.mk	0.659634	0.616117	turquoise
				Pav_sc0001422.1_g330.1.mk	-0.658344	-0.656165	turquoise													Pav_sc0001422.1_g330.1.mk	-0.658344	-0.666432	turquoise
				Pav_sc0000910.1_g410.1.mk	-0.658013	-0.681796	turquoise													Pav_sc0000910.1_g410.1.mk	-0.658013	-0.727332	turquoise
				Pav_sc0007100.1_g030.1.mk	-0.656723	-0.659424	turquoise													Pav_sc0007100.1_g030.1.mk	-0.656723	-0.549753	turquoise
				novel.632	0.656553	0.512122	turquoise													novel.632	0.656553	0.560329	turquoise
				Pav_sc0001049.1_g010.1.br	-0.656076	-0.708946	turquoise													Pav_sc0001049.1_g010.1.br	-0.656076	-0.768518	turquoise
				Pav_sc0000138.1_g540.1.mk	-0.655955	-0.716074	turquoise													Pav_sc0000138.1_g540.1.mk	-0.655955	-0.752241	turquoise
				Pav_sc0000752.1_g170.1.br	0.655616	0.526671	turquoise													Pav_sc0000752.1_g170.1.br	0.655616	0.415244	turquoise
				Pav_sc0000017.1_g670.1.mk	0.65341	0.440133	turquoise													Pav_sc0000017.1_g670.1.mk	0.65341	0.421537	turquoise
				Pav_sc0001059.1_g580.1.mk	-0.652103	-0.732979	turquoise													Pav_sc0001059.1_g580.1.mk	-0.652103	-0.799253	turquoise
				Pav_sc0001029.1_g020.1.mk	0.651894	0.78952	turquoise													Pav_sc0001029.1_g020.1.mk	0.651894	0.737152	turquoise
				Pav_sc0000257.1_g260.1.mk	-0.651721	-0.748959	turquoise													Pav_sc0000257.1_g260.1.mk	-0.651721	-0.80746	turquoise
				Pav_sc0005664.1_g060.1.mk	0.651121	0.763371	turquoise													Pav_sc0005664.1_g060.1.mk	0.651121	0.776564	turquoise
				novel.670	-0.650967	-0.655821	turquoise													novel.670	-0.650967	-0.633556	turquoise
				Pav_sc0003759.1_g070.1.mk	0.650553	0.754455	turquoise													Pav_sc0003759.1_g070.1.mk	0.650553	0.700397	turquoise
				Pav_sc0002099.1_g080.1.mk	0.650078	0.714755	turquoise													Pav_sc0002099.1_g080.1.mk	0.650078	0.764207	turquoise
				Pav_sc0001323.1_g390.1.mk	-0.649584	-0.646583	turquoise													Pav_sc0001323.1_g390.1.mk	-0.649584	-0.597045	turquoise
				Pav_sc0000675.1_g680.1.br	0.649388	0.431131	turquoise													Pav_sc0000675.1_g680.1.br	0.649388	0.275893	turquoise
				Pav_sc0000396.1_g920.1.mk	0.649041	0.821836	turquoise													Pav_sc0000396.1_g920.1.mk	0.649041	0.769233	turquoise
				Pav_sc0000220.1_g1030.1.mk	0.648579	0.479924	turquoise													Pav_sc0000220.1_g1030.1.mk	0.648579	0.325687	turquoise
				Pav_sc0000589.1_g030.1.mk	-0.648128	-0.676263	turquoise													Pav_sc0000589.1_g030.1.mk	-0.648128	-0.701632	turquoise
				Pav_sc0000910.1_g810.1.mk	0.646144	0.364837	turquoise													Pav_sc0000910.1_g810.1.mk	0.646144	0.306022	turquoise
				Pav_sc0000157.1_g800.1.mk	-0.64537	-0.614622	turquoise													Pav_sc0000157.1_g800.1.mk	-0.64537	-0.595874	turquoise
				Pav_co4016403.1_g010.1.br	-0.644487	-0.719499	turquoise													Pav_co4016403.1_g010.1.br	-0.644487	-0.751382	turquoise
				Pav_co4017443.1_g010.1.mk	0.644462	0.403668	turquoise													Pav_co4017443.1_g010.1.mk	0.644462	0.268687	turquoise
				Pav_sc0000554.1_g2080.1.mk	0.644436	0.657836	turquoise													Pav_sc0000554.1_g2080.1.mk	0.644436	0.549866	turquoise
				Pav_sc0001080.1_g360.1.mk	-0.643605	-0.697885	turquoise													Pav_sc0001080.1_g360.1.mk	-0.643605	-0.788474	turquoise
				Pav_sc0000129.1_g680.1.mk	0.643303	0.406777	turquoise													Pav_sc0000129.1_g680.1.mk	0.643303	0.212295	turquoise
				Pav_sc0000086.1_g200.1.mk	-0.643245	-0.60283	turquoise													Pav_sc0000086.1_g200.1.mk	-0.643245	-0.508795	turquoise
				Pav_sc0003279.1_g010.1.mk	-0.641913	-0.681215	turquoise													Pav_sc0003279.1_g010.1.mk	-0.641913	-0.706805	turquoise
				Pav_sc0000099.1_g610.1.mk	-0.641832	-0.635233	turquoise													Pav_sc0000099.1_g610.1.mk	-0.641832	-0.608929	turquoise
				Pav_sc0012642.1_g010.1.mk	0.641367	0.474372	turquoise													Pav_sc0012642.1_g010.1.mk	0.641367	0.302234	turquoise
				Pav_sc0000274.1_g430.1.mk	-0.641361	-0.705489	turquoise													Pav_sc0000274.1_g430.1.mk	-0.641361	-0.784688	turquoise
				Pav_sc0000054.1_g090.1.mk	0.641351	0.712241	turquoise													Pav_sc0000054.1_g090.1.mk	0.641351	0.726505	turquoise
				Pav_sc0000998.1_g090.1.mk	-0.641184	-0.550121	turquoise													Pav_sc0000998.1_g090.1.mk	-0.641184	-0.487236	turquoise
				Pav_sc0000491.1_g640.1.mk	-0.640646	-0.534377	turquoise													Pav_sc0000491.1_g640.1.mk	-0.640646	-0.431543	turquoise
				Pav_sc0009593.1_g020.1.br	0.640449	0.664157	turquoise													Pav_sc0009593.1_g020.1.br	0.640449	0.544505	turquoise
				Pav_co4075743.1_g010.1.mk	-0.640005	-0.715208	turquoise													Pav_co4075743.1_g010.1.mk	-0.640005	-0.734476	turquoise
				Pav_sc0000395.1_g270.1.mk	0.639852	0.422811	turquoise													Pav_sc0000395.1_g270.1.mk	0.639852	0.369988	turquoise
				Pav_sc0000103.1_g1780.1.mk	0.639409	0.56389	turquoise													Pav_sc0000103.1_g1780.1.mk	0.639409	0.414274	turquoise
				Pav_sc0002514.1_g030.1.mk	0.63896	0.668722	turquoise													Pav_sc0002514.1_g030.1.mk	0.63896	0.760352	turquoise
				Pav_sc0000689.1_g110.1.mk	0.638681	0.697588	turquoise													Pav_sc0000689.1_g110.1.mk	0.638681	0.661063	turquoise
				Pav_sc0000103.1_g270.1.mk	-0.638041	-0.649134	turquoise													Pav_sc0000103.1_g270.1.mk	-0.638041	-0.615984	turquoise
				Pav_sc0000257.1_g200.1.mk	-0.636978	-0.729715	turquoise													Pav_sc0000257.1_g200.1.mk	-0.636978	-0.767359	turquoise
				Pav_sc0003562.1_g350.1.mk	0.636131	0.52358	turquoise													Pav_sc0003562.1_g350.1.mk	0.636131	0.579315	turquoise
				Pav_sc0001288.1_g030.1.mk	0.634384	0.535052	turquoise													Pav_sc0001288.1_g030.1.mk	0.634384	0.420537	turquoise
				Pav_sc0001770.1_g130.1.mk	-0.634195	-0.611726	turquoise													Pav_sc0001770.1_g130.1.mk	-0.634195	-0.578697	turquoise
				Pav_sc0000383.1_g1180.1.mk	-0.634099	-0.723462	turquoise													Pav_sc0000383.1_g1180.1.mk	-0.634099	-0.815016	turquoise
				Pav_sc0001488.1_g010.1.br	0.634027	0.711759	turquoise													Pav_sc0001488.1_g010.1.br	0.634027	0.6708	turquoise
				Pav_sc0001258.1_g200.1.mk	-0.63382	-0.652555	turquoise													Pav_sc0001258.1_g200.1.mk	-0.63382	-0.640042	turquoise
				Pav_sc0000625.1_g030.1.mk	-0.633716	-0.57671	turquoise													Pav_sc0000625.1_g030.1.mk	-0.633716	-0.518032	turquoise
				Pav_sc0005957.1_g010.1.mk	-0.633591	-0.695349	turquoise													Pav_sc0005957.1_g010.1.mk	-0.633591	-0.763928	turquoise
				Pav_sc0000194.1_g140.1.mk	0.633399	0.526235	turquoise													Pav_sc0000194.1_g140.1.mk	0.633399	0.338429	turquoise
				Pav_sc0001289.1_g120.1.mk	0.633054	0.371246	turquoise													Pav_sc0001289.1_g120.1.mk	0.633054	0.212552	turquoise
				Pav_sc0000862.1_g450.1.br	0.632926	0.789297	turquoise													Pav_sc0000862.1_g450.1.br	0.632926	0.798683	turquoise
				Pav_sc0000212.1_g1020.1.mk	0.632877	0.51359	turquoise													Pav_sc0000212.1_g1020.1.mk	0.632877	0.354458	turquoise
				Pav_sc0000157.1_g860.1.mk	-0.631564	-0.678365	turquoise													Pav_sc0000157.1_g860.1.mk	-0.631564	-0.601899	turquoise
				Pav_sc0002998.1_g060.1.br	-0.631083	-0.724179	turquoise													Pav_sc0002998.1_g060.1.br	-0.631083	-0.785569	turquoise
				Pav_sc0000886.1_g420.1.mk	-0.63101	-0.714571	turquoise													Pav_sc0000886.1_g420.1.mk	-0.63101	-0.803441	turquoise
				Pav_sc0000484.1_g250.1.br	-0.630627	-0.679873	turquoise													Pav_sc0000484.1_g250.1.br	-0.630627	-0.69141	turquoise
				Pav_sc0000399.1_g110.1.mk	0.630221	0.452076	turquoise													Pav_sc0000399.1_g110.1.mk	0.630221	0.416647	turquoise
				Pav_sc0000588.1_g460.1.mk	0.630095	0.748988	turquoise													Pav_sc0000588.1_g460.1.mk	0.630095	0.777254	turquoise
				novel.843	0.627888	0.559268	turquoise													novel.843	0.627888	0.446554	turquoise
				Pav_sc0000206.1_g390.1.mk	0.627772	0.386797	turquoise													Pav_sc0000206.1_g390.1.mk	0.627772	0.249553	turquoise
				Pav_sc0002567.1_g230.1.mk	-0.627453	-0.550444	turquoise													Pav_sc0002567.1_g230.1.mk	-0.627453	-0.402858	turquoise
				Pav_sc0000311.1_g1050.1.mk	0.626987	0.577745	turquoise													Pav_sc0000311.1_g1050.1.mk	0.626987	0.57803	turquoise
				Pav_sc0002479.1_g170.1.br	0.626915	0.526587	turquoise													Pav_sc0002479.1_g170.1.br	0.626915	0.363594	turquoise
				Pav_sc0000747.1_g430.1.mk	-0.626467	-0.666676	turquoise													Pav_sc0000747.1_g430.1.mk	-0.626467	-0.656649	turquoise
				Pav_sc0000212.1_g1050.1.mk	-0.626193	-0.505027	turquoise													Pav_sc0000212.1_g1050.1.mk	-0.626193	-0.292539	turquoise
				Pav_sc0000414.1_g390.1.mk	0.625692	0.750648	turquoise													Pav_sc0000414.1_g390.1.mk	0.625692	0.652067	turquoise
				Pav_sc0000174.1_g710.1.mk	0.625294	0.676505	turquoise													Pav_sc0000174.1_g710.1.mk	0.625294	0.686486	turquoise
				Pav_sc0001405.1_g420.1.mk	0.624792	0.547077	turquoise													Pav_sc0001405.1_g420.1.mk	0.624792	0.390368	turquoise
				Pav_sc0004106.1_g010.1.br	0.624098	0.765589	turquoise													Pav_sc0004106.1_g010.1.br	0.624098	0.70789	turquoise
				Pav_sc0000813.1_g390.1.mk	0.623989	0.497636	turquoise													Pav_sc0000813.1_g390.1.mk	0.623989	0.50349	turquoise
				Pav_sc0000568.1_g370.1.mk	0.623302	0.417063	turquoise													Pav_sc0000568.1_g370.1.mk	0.623302	0.276702	turquoise
				novel.355	0.623247	0.606138	turquoise													novel.355	0.623247	0.523452	turquoise
				Pav_sc0001846.1_g040.1.mk	-0.623055	-0.632447	turquoise													Pav_sc0001846.1_g040.1.mk	-0.623055	-0.635007	turquoise
				Pav_sc0000886.1_g690.1.mk	0.623003	0.616943	turquoise													Pav_sc0000886.1_g690.1.mk	0.623003	0.537052	turquoise
				Pav_co4047483.1_g010.1.mk	-0.622852	-0.549857	turquoise													Pav_co4047483.1_g010.1.mk	-0.622852	-0.451464	turquoise
				Pav_sc0001227.1_g140.1.mk	0.62279	0.405399	turquoise													Pav_sc0001227.1_g140.1.mk	0.62279	0.275705	turquoise
				Pav_sc0008597.1_g030.1.br	-0.622029	-0.634979	turquoise													Pav_sc0008597.1_g030.1.br	-0.622029	-0.623961	turquoise
				Pav_sc0001877.1_g050.1.mk	0.621588	0.647421	turquoise													Pav_sc0001877.1_g050.1.mk	0.621588	0.727193	turquoise
				Pav_sc0000869.1_g450.1.mk	-0.621585	-0.55996	turquoise													Pav_sc0000869.1_g450.1.mk	-0.621585	-0.450881	turquoise
				Pav_sc0001051.1_g050.1.mk	-0.621538	-0.699487	turquoise													Pav_sc0001051.1_g050.1.mk	-0.621538	-0.75248	turquoise
				Pav_sc0000893.1_g1030.1.mk	-0.621012	-0.606028	turquoise													Pav_sc0000893.1_g1030.1.mk	-0.621012	-0.498666	turquoise
				Pav_sc0000704.1_g110.1.mk	-0.621003	-0.615581	turquoise													Pav_sc0000704.1_g110.1.mk	-0.621003	-0.639373	turquoise
				Pav_sc0000375.1_g510.1.mk	0.619079	0.361306	turquoise													Pav_sc0000375.1_g510.1.mk	0.619079	0.198031	turquoise
				Pav_sc0000567.1_g1110.1.mk	-0.618529	-0.524258	turquoise													Pav_sc0000567.1_g1110.1.mk	-0.618529	-0.435247	turquoise
				Pav_sc0001807.1_g140.1.mk	0.618349	0.764139	turquoise													Pav_sc0001807.1_g140.1.mk	0.618349	0.774886	turquoise
				Pav_sc0000583.1_g290.1.mk	-0.618073	-0.642607	turquoise													Pav_sc0000583.1_g290.1.mk	-0.618073	-0.617589	turquoise
				novel.807	-0.618002	-0.653387	turquoise													novel.807	-0.618002	-0.517086	turquoise
				Pav_co4036973.1_g010.1.mk	0.616996	0.672968	turquoise													Pav_co4036973.1_g010.1.mk	0.616996	0.562608	turquoise
				Pav_sc0000065.1_g590.1.mk	0.616771	0.391021	turquoise													Pav_sc0000065.1_g590.1.mk	0.616771	0.193019	turquoise
				Pav_sc0004348.1_g250.1.mk	0.616505	0.48227	turquoise													Pav_sc0004348.1_g250.1.mk	0.616505	0.436947	turquoise
				Pav_sc0000852.1_g1230.1.br	0.615215	0.421075	turquoise													Pav_sc0000852.1_g1230.1.br	0.615215	0.266668	turquoise
				Pav_sc0000129.1_g600.1.mk	0.614593	0.55077	turquoise													Pav_sc0000129.1_g600.1.mk	0.614593	0.655213	turquoise
				Pav_sc0001422.1_g340.1.mk	-0.614333	-0.65214	turquoise													Pav_sc0001422.1_g340.1.mk	-0.614333	-0.590519	turquoise
				Pav_sc0001123.1_g210.1.mk	0.614175	0.452945	turquoise													Pav_sc0001123.1_g210.1.mk	0.614175	0.297017	turquoise
				Pav_sc0000100.1_g080.1.br	-0.612663	-0.511293	turquoise													Pav_sc0000100.1_g080.1.br	-0.612663	-0.449957	turquoise
				Pav_sc0000351.1_g410.1.mk	0.612589	0.391194	turquoise													Pav_sc0000351.1_g410.1.mk	0.612589	0.292286	turquoise
				Pav_sc0001181.1_g090.1.mk	-0.611927	-0.649566	turquoise													Pav_sc0001181.1_g090.1.mk	-0.611927	-0.653518	turquoise
				Pav_sc0000557.1_g580.1.mk	-0.611735	-0.520541	turquoise													Pav_sc0000557.1_g580.1.mk	-0.611735	-0.415046	turquoise
				Pav_sc0000126.1_g130.1.mk	-0.611276	-0.525337	turquoise													Pav_sc0000126.1_g130.1.mk	-0.611276	-0.440089	turquoise
				Pav_sc0002181.1_g150.1.mk	-0.611258	-0.688831	turquoise													Pav_sc0002181.1_g150.1.mk	-0.611258	-0.760121	turquoise
				Pav_sc0000544.1_g110.1.mk	0.610728	0.639549	turquoise													Pav_sc0000544.1_g110.1.mk	0.610728	0.661927	turquoise
				novel.805	0.610618	0.628241	turquoise													novel.805	0.610618	0.558555	turquoise
				Pav_sc0000704.1_g100.1.mk	-0.609779	-0.595909	turquoise													Pav_sc0000704.1_g100.1.mk	-0.609779	-0.600404	turquoise
				Pav_sc0001476.1_g160.1.mk	-0.609714	-0.573491	turquoise													Pav_sc0001476.1_g160.1.mk	-0.609714	-0.420294	turquoise
				Pav_sc0000103.1_g580.1.mk	-0.608444	-0.647089	turquoise													Pav_sc0000103.1_g580.1.mk	-0.608444	-0.619262	turquoise
				Pav_sc0000981.1_g470.1.mk	-0.608429	-0.514175	turquoise													Pav_sc0000981.1_g470.1.mk	-0.608429	-0.402371	turquoise
				Pav_sc0000410.1_g470.1.mk	-0.608315	-0.570095	turquoise													Pav_sc0000410.1_g470.1.mk	-0.608315	-0.469593	turquoise
				Pav_sc0000702.1_g360.1.mk	0.608196	0.624663	turquoise													Pav_sc0000702.1_g360.1.mk	0.608196	0.6065	turquoise
				Pav_sc0001595.1_g080.1.br	-0.606949	-0.635917	turquoise													Pav_sc0001595.1_g080.1.br	-0.606949	-0.634131	turquoise
				novel.998	0.605984	0.595694	turquoise													novel.998	0.605984	0.497559	turquoise
				novel.263	-0.60598	-0.647305	turquoise													novel.263	-0.60598	-0.626667	turquoise
				Pav_sc0000912.1_g190.1.mk	0.605708	0.554006	turquoise													Pav_sc0000912.1_g190.1.mk	0.605708	0.387514	turquoise
				Pav_sc0000195.1_g940.1.mk	-0.605528	-0.612413	turquoise													Pav_sc0000195.1_g940.1.mk	-0.605528	-0.602447	turquoise
				Pav_sc0001205.1_g200.1.mk	-0.605179	-0.650653	turquoise													Pav_sc0001205.1_g200.1.mk	-0.605179	-0.593356	turquoise
				Pav_sc0000691.1_g780.1.br	-0.60506	-0.567161	turquoise													Pav_sc0000691.1_g780.1.br	-0.60506	-0.491809	turquoise
				Pav_sc0000573.1_g010.1.mk	-0.604757	-0.620056	turquoise													Pav_sc0000573.1_g010.1.mk	-0.604757	-0.645769	turquoise
				Pav_sc0000586.1_g170.1.mk	-0.604608	-0.623183	turquoise													Pav_sc0000586.1_g170.1.mk	-0.604608	-0.498855	turquoise
				novel.140	0.604549	0.693636	turquoise													novel.140	0.604549	0.690261	turquoise
				Pav_sc0000045.1_g070.1.mk	0.604417	0.54749	turquoise													Pav_sc0000045.1_g070.1.mk	0.604417	0.510758	turquoise
				Pav_sc0000375.1_g790.1.mk	-0.603393	-0.579384	turquoise													Pav_sc0000375.1_g790.1.mk	-0.603393	-0.5395	turquoise
				Pav_sc0001309.1_g260.1.mk	0.603194	0.642217	turquoise													Pav_sc0001309.1_g260.1.mk	0.603194	0.510656	turquoise
				Pav_sc0000071.1_g340.1.mk	-0.602142	-0.654707	turquoise													Pav_sc0000071.1_g340.1.mk	-0.602142	-0.663114	turquoise
				Pav_sc0000800.1_g620.1.br	0.601222	0.441184	turquoise													Pav_sc0000800.1_g620.1.br	0.601222	0.298508	turquoise
				Pav_sc0002456.1_g260.1.mk	0.600516	0.497758	turquoise													Pav_sc0002456.1_g260.1.mk	0.600516	0.314106	turquoise
				Pav_sc0000308.1_g360.1.mk	0.600391	0.779824	turquoise													Pav_sc0000308.1_g360.1.mk	0.600391	0.748498	turquoise
				Pav_sc0001710.1_g1350.1.mk	-0.599091	-0.646379	turquoise													Pav_sc0001710.1_g1350.1.mk	-0.599091	-0.648668	turquoise
				Pav_sc0006576.1_g010.1.mk	0.599064	0.575748	turquoise													Pav_sc0006576.1_g010.1.mk	0.599064	0.553263	turquoise
				Pav_sc0000220.1_g1210.1.mk	0.598159	0.397186	turquoise													Pav_sc0000220.1_g1210.1.mk	0.598159	0.339792	turquoise
				Pav_sc0003846.1_g010.1.br	0.597974	0.719481	turquoise													Pav_sc0003846.1_g010.1.br	0.597974	0.712703	turquoise
				Pav_sc0000598.1_g270.1.mk	0.597791	0.702316	turquoise													Pav_sc0000598.1_g270.1.mk	0.597791	0.70289	turquoise
				Pav_sc0001529.1_g360.1.mk	0.59758	0.776059	turquoise													Pav_sc0001529.1_g360.1.mk	0.59758	0.704248	turquoise
				Pav_sc0000554.1_g2240.1.mk	-0.597247	-0.664692	turquoise													Pav_sc0000554.1_g2240.1.mk	-0.597247	-0.697889	turquoise
				Pav_sc0002837.1_g050.1.mk	0.595756	0.703257	turquoise													Pav_sc0002837.1_g050.1.mk	0.595756	0.676682	turquoise
				Pav_sc0001196.1_g620.1.mk	0.595284	0.431317	turquoise													Pav_sc0001196.1_g620.1.mk	0.595284	0.321898	turquoise
				Pav_sc0000825.1_g200.1.mk	-0.594838	-0.623235	turquoise													Pav_sc0000825.1_g200.1.mk	-0.594838	-0.580965	turquoise
				Pav_sc0000096.1_g310.1.mk	0.594398	0.331821	turquoise													Pav_sc0000096.1_g310.1.mk	0.594398	0.168503	turquoise
				Pav_sc0001181.1_g1100.1.br	-0.594344	-0.655023	turquoise													Pav_sc0001181.1_g1100.1.br	-0.594344	-0.743158	turquoise
				Pav_sc0000464.1_g910.1.mk	0.59405	0.344349	turquoise													Pav_sc0000464.1_g910.1.mk	0.59405	0.176552	turquoise
				Pav_sc0000893.1_g1120.1.mk	0.592975	0.707188	turquoise													Pav_sc0000893.1_g1120.1.mk	0.592975	0.670935	turquoise
				Pav_sc0000910.1_g200.1.mk	0.592565	0.562409	turquoise													Pav_sc0000910.1_g200.1.mk	0.592565	0.630218	turquoise
				novel.1219	0.592393	0.476545	turquoise													novel.1219	0.592393	0.472984	turquoise
				Pav_sc0000558.1_g260.1.mk	-0.591567	-0.655019	turquoise													Pav_sc0000558.1_g260.1.mk	-0.591567	-0.696116	turquoise
				Pav_sc0000107.1_g030.1.br	-0.590997	-0.694166	turquoise													Pav_sc0000107.1_g030.1.br	-0.590997	-0.70439	turquoise
				Pav_sc0002998.1_g040.1.mk	-0.590854	-0.565087	turquoise													Pav_sc0002998.1_g040.1.mk	-0.590854	-0.425604	turquoise
				Pav_sc0000373.1_g820.1.mk	-0.590095	-0.514673	turquoise													Pav_sc0000373.1_g820.1.mk	-0.590095	-0.406498	turquoise
				Pav_sc0000084.1_g370.1.mk	-0.590013	-0.680461	turquoise													Pav_sc0000084.1_g370.1.mk	-0.590013	-0.737779	turquoise
				Pav_sc0000700.1_g900.1.mk	0.590008	0.517986	turquoise													Pav_sc0000700.1_g900.1.mk	0.590008	0.429831	turquoise
				Pav_sc0002607.1_g140.1.mk	0.589931	0.381149	turquoise													Pav_sc0002607.1_g140.1.mk	0.589931	0.247998	turquoise
				Pav_sc0000206.1_g300.1.br	0.589633	0.673883	turquoise													Pav_sc0000206.1_g300.1.br	0.589633	0.615622	turquoise
				Pav_sc0000554.1_g570.1.mk	-0.589404	-0.565825	turquoise													Pav_sc0000554.1_g570.1.mk	-0.589404	-0.520903	turquoise
				novel.1241	0.587807	0.769095	turquoise													novel.1241	0.587807	0.692866	turquoise
				Pav_sc0001025.1_g120.1.mk	0.587163	0.629853	turquoise													Pav_sc0001025.1_g120.1.mk	0.587163	0.585242	turquoise
				Pav_sc0000691.1_g770.1.br	-0.587072	-0.527991	turquoise													Pav_sc0000691.1_g770.1.br	-0.587072	-0.413003	turquoise
				Pav_sc0000975.1_g120.1.mk	-0.585602	-0.571032	turquoise													Pav_sc0000975.1_g120.1.mk	-0.585602	-0.467128	turquoise
				Pav_sc0001243.1_g220.1.mk	0.585414	0.719334	turquoise													Pav_sc0001243.1_g220.1.mk	0.585414	0.77067	turquoise
				Pav_sc0001974.1_g080.1.mk	0.585265	0.548194	turquoise													Pav_sc0001974.1_g080.1.mk	0.585265	0.389422	turquoise
				Pav_sc0000449.1_g500.1.mk	0.584923	0.570286	turquoise													Pav_sc0000449.1_g500.1.mk	0.584923	0.454864	turquoise
				Pav_sc0000071.1_g660.1.mk	-0.584798	-0.650649	turquoise													Pav_sc0000071.1_g660.1.mk	-0.584798	-0.700854	turquoise
				Pav_sc0000099.1_g880.1.mk	0.584625	0.568845	turquoise													Pav_sc0000099.1_g880.1.mk	0.584625	0.41612	turquoise
				Pav_sc0000027.1_g110.1.mk	0.58434	0.787759	turquoise													Pav_sc0000027.1_g110.1.mk	0.58434	0.761133	turquoise
				Pav_sc0003515.1_g020.1.br	-0.584114	-0.633458	turquoise													Pav_sc0003515.1_g020.1.br	-0.584114	-0.591719	turquoise
				novel.850	-0.584012	-0.608289	turquoise													novel.850	-0.584012	-0.662137	turquoise
				Pav_sc0000414.1_g070.1.br	0.582819	0.471204	turquoise													Pav_sc0000414.1_g070.1.br	0.582819	0.409396	turquoise
				Pav_sc0001126.1_g210.1.br	0.581822	0.707711	turquoise													Pav_sc0001126.1_g210.1.br	0.581822	0.709266	turquoise
				Pav_co3999333.1_g010.1.mk	0.581436	0.366703	turquoise													Pav_co3999333.1_g010.1.mk	0.581436	0.375635	turquoise
				Pav_sc0002327.1_g410.1.mk	-0.579758	-0.700379	turquoise													Pav_sc0002327.1_g410.1.mk	-0.579758	-0.724311	turquoise
				Pav_sc0003515.1_g080.1.mk	0.579128	0.484759	turquoise													Pav_sc0003515.1_g080.1.mk	0.579128	0.379424	turquoise
				Pav_sc0001502.1_g420.1.mk	-0.57858	-0.624633	turquoise													Pav_sc0001502.1_g420.1.mk	-0.57858	-0.639348	turquoise
				Pav_sc0001084.1_g230.1.mk	0.578179	0.805134	turquoise													Pav_sc0001084.1_g230.1.mk	0.578179	0.824317	turquoise
				Pav_sc0000212.1_g1700.1.mk	0.577708	0.621996	turquoise													Pav_sc0000212.1_g1700.1.mk	0.577708	0.443433	turquoise
				Pav_sc0000052.1_g700.1.mk	0.576326	0.372861	turquoise													Pav_sc0000052.1_g700.1.mk	0.576326	0.185467	turquoise
				Pav_sc0000354.1_g180.1.mk	-0.575863	-0.605521	turquoise													Pav_sc0000354.1_g180.1.mk	-0.575863	-0.577894	turquoise
				Pav_sc0000675.1_g1150.1.mk	0.575283	0.591172	turquoise													Pav_sc0000675.1_g1150.1.mk	0.575283	0.576493	turquoise
				Pav_sc0002233.1_g520.1.mk	0.575111	0.638947	turquoise													Pav_sc0002233.1_g520.1.mk	0.575111	0.49594	turquoise
				Pav_sc0000493.1_g100.1.mk	0.574899	0.32561	turquoise													Pav_sc0000493.1_g100.1.mk	0.574899	0.161493	turquoise
				Pav_sc0001107.1_g160.1.mk	0.573657	0.602952	turquoise													Pav_sc0001107.1_g160.1.mk	0.573657	0.629208	turquoise
				Pav_sc0001280.1_g090.1.mk	0.573118	0.350004	turquoise													Pav_sc0001280.1_g090.1.mk	0.573118	0.220662	turquoise
				Pav_sc0000474.1_g130.1.mk	-0.572668	-0.67595	turquoise													Pav_sc0000474.1_g130.1.mk	-0.572668	-0.718134	turquoise
				Pav_sc0000293.1_g570.1.mk	0.572033	0.441618	turquoise													Pav_sc0000293.1_g570.1.mk	0.572033	0.324628	turquoise
				Pav_sc0000493.1_g150.1.mk	0.571707	0.576331	turquoise													Pav_sc0000493.1_g150.1.mk	0.571707	0.487538	turquoise
				Pav_sc0000440.1_g200.1.mk	0.571581	0.597719	turquoise													Pav_sc0000440.1_g200.1.mk	0.571581	0.491174	turquoise
				Pav_sc0000348.1_g470.1.mk	0.571285	0.679627	turquoise													Pav_sc0000348.1_g470.1.mk	0.571285	0.60778	turquoise
				Pav_sc0001488.1_g030.1.mk	0.570953	0.713267	turquoise													Pav_sc0001488.1_g030.1.mk	0.570953	0.655469	turquoise
				novel.1123	0.570752	0.572311	turquoise													novel.1123	0.570752	0.570563	turquoise
				Pav_sc0001718.1_g270.1.mk	0.570698	0.704488	turquoise													Pav_sc0001718.1_g270.1.mk	0.570698	0.669093	turquoise
				Pav_sc0001699.1_g120.1.br	0.570456	0.59511	turquoise													Pav_sc0001699.1_g120.1.br	0.570456	0.497865	turquoise
				Pav_sc0000648.1_g430.1.mk	-0.569611	-0.61148	turquoise													Pav_sc0000648.1_g430.1.mk	-0.569611	-0.611197	turquoise
				Pav_sc0000491.1_g610.1.mk	-0.569097	-0.641376	turquoise													Pav_sc0000491.1_g610.1.mk	-0.569097	-0.666754	turquoise
				Pav_sc0000732.1_g050.1.mk	-0.568207	-0.600149	turquoise													Pav_sc0000732.1_g050.1.mk	-0.568207	-0.631261	turquoise
				Pav_sc0000127.1_g180.1.mk	0.566401	0.376628	turquoise													Pav_sc0000127.1_g180.1.mk	0.566401	0.227017	turquoise
				Pav_sc0000102.1_g780.1.mk	0.566389	0.450077	turquoise													Pav_sc0000102.1_g780.1.mk	0.566389	0.43598	turquoise
				Pav_sc0000558.1_g010.1.br	-0.566055	-0.556798	turquoise													Pav_sc0000558.1_g010.1.br	-0.566055	-0.516875	turquoise
				Pav_sc0001191.1_g120.1.mk	0.565994	0.614711	turquoise													Pav_sc0001191.1_g120.1.mk	0.565994	0.510018	turquoise
				Pav_sc0002842.1_g300.1.mk	0.565649	0.736384	turquoise													Pav_sc0002842.1_g300.1.mk	0.565649	0.658953	turquoise
				Pav_sc0000036.1_g140.1.br	-0.565601	-0.570611	turquoise													Pav_sc0000036.1_g140.1.br	-0.565601	-0.559636	turquoise
				Pav_sc0002327.1_g730.1.mk	0.563937	0.705209	turquoise													Pav_sc0002327.1_g730.1.mk	0.563937	0.705974	turquoise
				Pav_sc0000740.1_g430.1.mk	0.563228	0.548733	turquoise													Pav_sc0000740.1_g430.1.mk	0.563228	0.44708	turquoise
				Pav_sc0000055.1_g210.1.mk	-0.563123	-0.553225	turquoise													Pav_sc0000055.1_g210.1.mk	-0.563123	-0.495169	turquoise
				Pav_sc0001644.1_g160.1.mk	0.56292	0.35656	turquoise													Pav_sc0001644.1_g160.1.mk	0.56292	0.208269	turquoise
				Pav_sc0000583.1_g510.1.mk	0.562425	0.628507	turquoise													Pav_sc0000583.1_g510.1.mk	0.562425	0.574761	turquoise
				Pav_sc0000716.1_g250.1.mk	-0.562098	-0.585344	turquoise													Pav_sc0000716.1_g250.1.mk	-0.562098	-0.584223	turquoise
				Pav_sc0001938.1_g260.1.mk	0.561785	0.511128	turquoise													Pav_sc0001938.1_g260.1.mk	0.561785	0.375134	turquoise
				Pav_sc0003756.1_g050.1.mk	-0.561723	-0.658639	turquoise													Pav_sc0003756.1_g050.1.mk	-0.561723	-0.651753	turquoise
				Pav_sc0001109.1_g040.1.mk	0.561417	0.647159	turquoise													Pav_sc0001109.1_g040.1.mk	0.561417	0.5007	turquoise
				Pav_sc0000311.1_g1160.1.mk	0.561152	0.504561	turquoise													Pav_sc0000311.1_g1160.1.mk	0.561152	0.524723	turquoise
				Pav_sc0001102.1_g820.1.mk	0.560198	0.603391	turquoise													Pav_sc0001102.1_g820.1.mk	0.560198	0.589973	turquoise
				Pav_sc0001869.1_g260.1.mk	-0.559616	-0.445075	turquoise													Pav_sc0001869.1_g260.1.mk	-0.559616	-0.272479	turquoise
				Pav_sc0000558.1_g320.1.mk	0.559454	0.739061	turquoise													Pav_sc0000558.1_g320.1.mk	0.559454	0.770797	turquoise
				Pav_sc0000375.1_g050.1.mk	0.55881	0.746723	turquoise													Pav_sc0000375.1_g050.1.mk	0.55881	0.732751	turquoise
				Pav_sc0001576.1_g170.1.mk	0.558388	0.626596	turquoise													Pav_sc0001576.1_g170.1.mk	0.558388	0.629944	turquoise
				Pav_sc0002055.1_g130.1.mk	0.558079	0.554325	turquoise													Pav_sc0002055.1_g130.1.mk	0.558079	0.437318	turquoise
				novel.92	-0.557104	-0.377694	turquoise													novel.92	-0.557104	-0.23978	turquoise
				Pav_sc0000009.1_g310.1.mk	-0.557075	-0.621861	turquoise													Pav_sc0000009.1_g310.1.mk	-0.557075	-0.614408	turquoise
				Pav_sc0010044.1_g010.1.mk	-0.556062	-0.568963	turquoise													Pav_sc0010044.1_g010.1.mk	-0.556062	-0.534879	turquoise
				Pav_sc0000289.1_g320.1.mk	-0.554582	-0.654064	turquoise													Pav_sc0000289.1_g320.1.mk	-0.554582	-0.648893	turquoise
				Pav_sc0000567.1_g160.1.mk	-0.554076	-0.479057	turquoise													Pav_sc0000567.1_g160.1.mk	-0.554076	-0.40161	turquoise
				Pav_sc0000608.1_g030.1.mk	-0.553954	-0.645174	turquoise													Pav_sc0000608.1_g030.1.mk	-0.553954	-0.675575	turquoise
				Pav_sc0000195.1_g130.1.mk	0.553932	0.463635	turquoise													Pav_sc0000195.1_g130.1.mk	0.553932	0.294866	turquoise
				Pav_sc0000363.1_g700.1.mk	0.553782	0.351187	turquoise													Pav_sc0000363.1_g700.1.mk	0.553782	0.247506	turquoise
				Pav_sc0001073.1_g080.1.mk	0.553728	0.257095	turquoise													Pav_sc0001073.1_g080.1.mk	0.553728	0.153425	turquoise
				Pav_sc0000176.1_g080.1.mk	0.552525	0.601531	turquoise													Pav_sc0000176.1_g080.1.mk	0.552525	0.428712	turquoise
				Pav_sc0008108.1_g010.1.mk	-0.551058	-0.589394	turquoise													Pav_sc0008108.1_g010.1.mk	-0.551058	-0.63003	turquoise
				novel.1066	-0.550749	-0.590209	turquoise													novel.1066	-0.550749	-0.568292	turquoise
				Pav_sc0000522.1_g010.1.mk	-0.550637	-0.533723	turquoise													Pav_sc0000522.1_g010.1.mk	-0.550637	-0.480315	turquoise
				Pav_sc0000615.1_g090.1.mk	-0.550484	-0.560241	turquoise													Pav_sc0000615.1_g090.1.mk	-0.550484	-0.519998	turquoise
				Pav_sc0000652.1_g350.1.mk	0.550083	0.753806	turquoise													Pav_sc0000652.1_g350.1.mk	0.550083	0.727626	turquoise
				Pav_sc0000055.1_g230.1.mk	0.548811	0.674302	turquoise													Pav_sc0000055.1_g230.1.mk	0.548811	0.701136	turquoise
				Pav_sc0001289.1_g570.1.mk	0.5481	0.745361	turquoise													Pav_sc0001289.1_g570.1.mk	0.5481	0.756548	turquoise
				Pav_sc0000540.1_g070.1.mk	0.547082	0.736751	turquoise													Pav_sc0000540.1_g070.1.mk	0.547082	0.768163	turquoise
				novel.363	-0.546983	-0.48864	turquoise													novel.363	-0.546983	-0.43304	turquoise
				Pav_sc0001003.1_g140.1.mk	0.545769	0.293224	turquoise													Pav_sc0001003.1_g140.1.mk	0.545769	0.204853	turquoise
				Pav_sc0000354.1_g050.1.mk	-0.544972	-0.459309	turquoise													Pav_sc0000354.1_g050.1.mk	-0.544972	-0.372937	turquoise
				Pav_sc0001872.1_g130.1.mk	0.544163	0.346808	turquoise													Pav_sc0001872.1_g130.1.mk	0.544163	0.18194	turquoise
				Pav_sc0000978.1_g020.1.mk	-0.544121	-0.580744	turquoise													Pav_sc0000978.1_g020.1.mk	-0.544121	-0.532072	turquoise
				Pav_sc0000261.1_g190.1.mk	0.543817	0.577325	turquoise													Pav_sc0000261.1_g190.1.mk	0.543817	0.477658	turquoise
				Pav_sc0000024.1_g510.1.mk	0.543252	0.667429	turquoise													Pav_sc0000024.1_g510.1.mk	0.543252	0.675372	turquoise
				Pav_sc0002998.1_g130.1.mk	-0.543204	-0.611693	turquoise													Pav_sc0002998.1_g130.1.mk	-0.543204	-0.616119	turquoise
				Pav_sc0012284.1_g020.1.mk	-0.542884	-0.377112	turquoise													Pav_sc0012284.1_g020.1.mk	-0.542884	-0.194233	turquoise
				Pav_sc0001502.1_g030.1.mk	-0.541714	-0.470125	turquoise													Pav_sc0001502.1_g030.1.mk	-0.541714	-0.310472	turquoise
				Pav_sc0000108.1_g1020.1.mk	-0.538953	-0.505825	turquoise													Pav_sc0000108.1_g1020.1.mk	-0.538953	-0.41315	turquoise
				Pav_sc0011895.1_g020.1.mk	0.537818	0.465855	turquoise													Pav_sc0011895.1_g020.1.mk	0.537818	0.341383	turquoise
				Pav_sc0002451.1_g370.1.br	0.537363	0.68533	turquoise													Pav_sc0002451.1_g370.1.br	0.537363	0.614873	turquoise
				Pav_sc0000072.1_g120.1.br	0.536863	0.290488	turquoise													Pav_sc0000072.1_g120.1.br	0.536863	0.201913	turquoise
				Pav_sc0000009.1_g1100.1.mk	0.536302	0.323113	turquoise													Pav_sc0000009.1_g1100.1.mk	0.536302	0.145769	turquoise
				Pav_sc0000381.1_g240.1.mk	0.53627	0.468181	turquoise													Pav_sc0000381.1_g240.1.mk	0.53627	0.463869	turquoise
				novel.42	-0.535914	-0.544487	turquoise													novel.42	-0.535914	-0.578848	turquoise
				Pav_sc0002893.1_g370.1.mk	0.535476	0.32952	turquoise													Pav_sc0002893.1_g370.1.mk	0.535476	0.188216	turquoise
				Pav_sc0000467.1_g030.1.mk	0.534847	0.450814	turquoise													Pav_sc0000467.1_g030.1.mk	0.534847	0.27272	turquoise
				Pav_sc0000299.1_g380.1.mk	0.534693	0.574925	turquoise													Pav_sc0000299.1_g380.1.mk	0.534693	0.44736	turquoise
				Pav_sc0006480.1_g030.1.br	-0.534673	-0.557745	turquoise													Pav_sc0006480.1_g030.1.br	-0.534673	-0.608138	turquoise
				Pav_sc0000675.1_g720.1.mk	0.534205	0.302379	turquoise													Pav_sc0000675.1_g720.1.mk	0.534205	0.152652	turquoise
				Pav_sc0000557.1_g1330.1.mk	0.533207	0.381986	turquoise													Pav_sc0000557.1_g1330.1.mk	0.533207	0.265245	turquoise
				Pav_sc0001051.1_g610.1.mk	0.532982	0.497854	turquoise													Pav_sc0001051.1_g610.1.mk	0.532982	0.335177	turquoise
				Pav_sc0000257.1_g860.1.mk	0.531641	0.74209	turquoise													Pav_sc0000257.1_g860.1.mk	0.531641	0.636065	turquoise
				Pav_sc0007209.1_g120.1.mk	0.531317	0.677962	turquoise													Pav_sc0007209.1_g120.1.mk	0.531317	0.63747	turquoise
				Pav_sc0000410.1_g210.1.mk	0.531231	0.570031	turquoise													Pav_sc0000410.1_g210.1.mk	0.531231	0.55974	turquoise
				Pav_sc0000006.1_g330.1.mk	0.530692	0.380436	turquoise													Pav_sc0000006.1_g330.1.mk	0.530692	0.17372	turquoise
				Pav_sc0000675.1_g1140.1.mk	0.530622	0.392261	turquoise													Pav_sc0000675.1_g1140.1.mk	0.530622	0.325906	turquoise
				Pav_sc0003614.1_g350.1.mk	0.529687	0.615568	turquoise													Pav_sc0003614.1_g350.1.mk	0.529687	0.549338	turquoise
				Pav_sc0002080.1_g310.1.mk	0.529655	0.234541	turquoise													Pav_sc0002080.1_g310.1.mk	0.529655	0.120955	turquoise
				Pav_sc0000311.1_g1270.1.mk	0.529475	0.337341	turquoise													Pav_sc0000311.1_g1270.1.mk	0.529475	0.245425	turquoise
				Pav_sc0000129.1_g730.1.mk	-0.529214	-0.557282	turquoise													Pav_sc0000129.1_g730.1.mk	-0.529214	-0.542579	turquoise
				Pav_sc0000410.1_g570.1.br	0.52719	0.299464	turquoise													Pav_sc0000410.1_g570.1.br	0.52719	0.255635	turquoise
				Pav_sc0000440.1_g020.1.mk	0.527132	0.411856	turquoise													Pav_sc0000440.1_g020.1.mk	0.527132	0.308753	turquoise
				Pav_sc0001015.1_g180.1.mk	0.526491	0.640423	turquoise													Pav_sc0001015.1_g180.1.mk	0.526491	0.588174	turquoise
				Pav_sc0000503.1_g620.1.mk	0.525871	0.662207	turquoise													Pav_sc0000503.1_g620.1.mk	0.525871	0.588149	turquoise
				Pav_sc0001557.1_g150.1.mk	0.525736	0.522119	turquoise													Pav_sc0001557.1_g150.1.mk	0.525736	0.419603	turquoise
				Pav_sc0002286.1_g070.1.mk	-0.525506	-0.505659	turquoise													Pav_sc0002286.1_g070.1.mk	-0.525506	-0.455172	turquoise
				Pav_sc0005746.1_g150.1.mk	0.525355	0.550626	turquoise													Pav_sc0005746.1_g150.1.mk	0.525355	0.576852	turquoise
				Pav_sc0000138.1_g340.1.mk	0.525095	0.689597	turquoise													Pav_sc0000138.1_g340.1.mk	0.525095	0.708068	turquoise
				Pav_sc0000480.1_g460.1.mk	0.524426	0.668703	turquoise													Pav_sc0000480.1_g460.1.mk	0.524426	0.567091	turquoise
				Pav_sc0003823.1_g060.1.mk	0.523602	0.383541	turquoise													Pav_sc0003823.1_g060.1.mk	0.523602	0.337571	turquoise
				Pav_sc0000618.1_g390.1.mk	0.522853	0.283285	turquoise													Pav_sc0000618.1_g390.1.mk	0.522853	0.141863	turquoise
				Pav_sc0000065.1_g390.1.br	0.521371	0.703276	turquoise													Pav_sc0000065.1_g390.1.br	0.521371	0.642734	turquoise
				Pav_sc0000254.1_g650.1.br	-0.521196	-0.489092	turquoise													Pav_sc0000254.1_g650.1.br	-0.521196	-0.476127	turquoise
				Pav_sc0001406.1_g060.1.br	-0.520404	-0.493249	turquoise													Pav_sc0001406.1_g060.1.br	-0.520404	-0.498985	turquoise
				Pav_sc0000212.1_g970.1.mk	0.519841	0.50415	turquoise													Pav_sc0000212.1_g970.1.mk	0.519841	0.336464	turquoise
				Pav_sc0000363.1_g280.1.mk	0.519184	0.594151	turquoise													Pav_sc0000363.1_g280.1.mk	0.519184	0.506691	turquoise
				Pav_sc0000257.1_g280.1.mk	0.517567	0.508007	turquoise													Pav_sc0000257.1_g280.1.mk	0.517567	0.396901	turquoise
				Pav_sc0001309.1_g650.1.mk	-0.517166	-0.427485	turquoise													Pav_sc0001309.1_g650.1.mk	-0.517166	-0.309775	turquoise
				Pav_sc0002342.1_g050.1.mk	-0.515649	-0.568383	turquoise													Pav_sc0002342.1_g050.1.mk	-0.515649	-0.572514	turquoise
				Pav_sc0000094.1_g320.1.mk	0.515643	0.354695	turquoise													Pav_sc0000094.1_g320.1.mk	0.515643	0.27759	turquoise
				Pav_sc0008550.1_g010.1.br	-0.515253	-0.591576	turquoise													Pav_sc0008550.1_g010.1.br	-0.515253	-0.597933	turquoise
				novel.82	-0.515118	-0.535685	turquoise													novel.82	-0.515118	-0.552005	turquoise
				Pav_sc0001377.1_g200.1.br	0.515111	0.529901	turquoise													Pav_sc0001377.1_g200.1.br	0.515111	0.370119	turquoise
				novel.810	0.514507	0.432661	turquoise													novel.810	0.514507	0.455807	turquoise
				Pav_sc0002009.1_g400.1.mk	0.514495	0.44478	turquoise													Pav_sc0002009.1_g400.1.mk	0.514495	0.388371	turquoise
				Pav_sc0001405.1_g950.1.mk	-0.514242	-0.562493	turquoise													Pav_sc0001405.1_g950.1.mk	-0.514242	-0.588837	turquoise
				Pav_sc0000129.1_g1600.1.mk	0.514097	0.454435	turquoise													Pav_sc0000129.1_g1600.1.mk	0.514097	0.316229	turquoise
				Pav_sc0002233.1_g150.1.mk	-0.512752	-0.572178	turquoise													Pav_sc0002233.1_g150.1.mk	-0.512752	-0.618425	turquoise
				Pav_sc0000890.1_g1470.1.mk	0.51267	0.501106	turquoise													Pav_sc0000890.1_g1470.1.mk	0.51267	0.383153	turquoise
				Pav_sc0000691.1_g710.1.mk	-0.511824	-0.506421	turquoise													Pav_sc0000691.1_g710.1.mk	-0.511824	-0.317297	turquoise
				Pav_sc0000639.1_g080.1.br	-0.51101	-0.572305	turquoise													Pav_sc0000639.1_g080.1.br	-0.51101	-0.607775	turquoise
				Pav_sc0001397.1_g070.1.mk	0.510147	0.388444	turquoise													Pav_sc0001397.1_g070.1.mk	0.510147	0.244947	turquoise
				Pav_sc0000583.1_g1110.1.mk	0.509267	0.292648	turquoise													Pav_sc0000583.1_g1110.1.mk	0.509267	0.131099	turquoise
				Pav_sc0002828.1_g660.1.mk	0.508258	0.560824	turquoise													Pav_sc0002828.1_g660.1.mk	0.508258	0.565522	turquoise
				Pav_sc0000869.1_g520.1.br	0.507312	0.606479	turquoise													Pav_sc0000869.1_g520.1.br	0.507312	0.607618	turquoise
				Pav_sc0001900.1_g200.1.br	0.506541	0.577841	turquoise													Pav_sc0001900.1_g200.1.br	0.506541	0.53163	turquoise
				Pav_sc0002195.1_g050.1.mk	0.505469	0.517853	turquoise													Pav_sc0002195.1_g050.1.mk	0.505469	0.401947	turquoise
				Pav_sc0001576.1_g110.1.mk	0.505272	0.465785	turquoise													Pav_sc0001576.1_g110.1.mk	0.505272	0.361975	turquoise
				Pav_sc0002479.1_g520.1.br	-0.50521	-0.601204	turquoise													Pav_sc0002479.1_g520.1.br	-0.50521	-0.68273	turquoise
				Pav_sc0000556.1_g030.1.mk	0.504599	0.613289	turquoise													Pav_sc0000556.1_g030.1.mk	0.504599	0.5883	turquoise
				Pav_sc0002858.1_g030.1.mk	0.503945	0.651016	turquoise													Pav_sc0002858.1_g030.1.mk	0.503945	0.56684	turquoise
				Pav_sc0000484.1_g160.1.mk	-0.501789	-0.55799	turquoise													Pav_sc0000484.1_g160.1.mk	-0.501789	-0.563669	turquoise
				Pav_sc0006147.1_g010.1.mk	0.500181	0.280758	turquoise													Pav_sc0006147.1_g010.1.mk	0.500181	0.126949	turquoise
				Pav_sc0000583.1_g530.1.mk	0.49932	0.474209	turquoise													Pav_sc0000583.1_g530.1.mk	0.49932	0.30248	turquoise
				Pav_sc0001046.1_g470.1.mk	-0.499	-0.499211	turquoise													Pav_sc0001046.1_g470.1.mk	-0.499	-0.402845	turquoise
				Pav_sc0001797.1_g020.1.br	0.498612	0.576664	turquoise													Pav_sc0001797.1_g020.1.br	0.498612	0.514853	turquoise
				Pav_sc0000085.1_g050.1.mk	0.498159	0.200034	turquoise													Pav_sc0000085.1_g050.1.mk	0.498159	0.0575621	turquoise
				Pav_sc0000212.1_g1610.1.mk	-0.498013	-0.50549	turquoise													Pav_sc0000212.1_g1610.1.mk	-0.498013	-0.426292	turquoise
				Pav_sc0000164.1_g190.1.br	0.497655	0.423674	turquoise													Pav_sc0000164.1_g190.1.br	0.497655	0.268828	turquoise
				Pav_sc0001479.1_g140.1.mk	0.49731	0.393053	turquoise													Pav_sc0001479.1_g140.1.mk	0.49731	0.189852	turquoise
				Pav_sc0001502.1_g370.1.mk	-0.497259	-0.587519	turquoise													Pav_sc0001502.1_g370.1.mk	-0.497259	-0.64302	turquoise
				Pav_sc0000563.1_g250.1.mk	0.49668	0.58929	turquoise													Pav_sc0000563.1_g250.1.mk	0.49668	0.648623	turquoise
				Pav_sc0000652.1_g020.1.mk	-0.495445	-0.553768	turquoise													Pav_sc0000652.1_g020.1.mk	-0.495445	-0.570905	turquoise
				novel.1232	0.495256	0.643775	turquoise													novel.1232	0.495256	0.598609	turquoise
				Pav_sc0000054.1_g080.1.mk	0.494075	0.724354	turquoise													Pav_sc0000054.1_g080.1.mk	0.494075	0.718429	turquoise
				Pav_sc0002524.1_g100.1.mk	0.494002	0.627521	turquoise													Pav_sc0002524.1_g100.1.mk	0.494002	0.560821	turquoise
				Pav_sc0000376.1_g390.1.mk	0.493453	0.521432	turquoise													Pav_sc0000376.1_g390.1.mk	0.493453	0.452185	turquoise
				Pav_sc0000084.1_g460.1.mk	0.493032	0.344298	turquoise													Pav_sc0000084.1_g460.1.mk	0.493032	0.198964	turquoise
				Pav_sc0001990.1_g110.1.mk	-0.4923	-0.492285	turquoise													Pav_sc0001990.1_g110.1.mk	-0.4923	-0.549017	turquoise
				Pav_sc0000381.1_g220.1.mk	-0.490045	-0.462199	turquoise													Pav_sc0000381.1_g220.1.mk	-0.490045	-0.379747	turquoise
				Pav_sc0002360.1_g760.1.mk	0.489898	0.327193	turquoise													Pav_sc0002360.1_g760.1.mk	0.489898	0.206823	turquoise
				Pav_sc0000890.1_g500.1.mk	0.488086	0.340321	turquoise													Pav_sc0000890.1_g500.1.mk	0.488086	0.29239	turquoise
				Pav_sc0001107.1_g370.1.mk	0.487437	0.657794	turquoise													Pav_sc0001107.1_g370.1.mk	0.487437	0.669794	turquoise
				Pav_sc0000138.1_g280.1.mk	0.487425	0.646894	turquoise													Pav_sc0000138.1_g280.1.mk	0.487425	0.687902	turquoise
				Pav_sc0000588.1_g900.1.mk	0.487322	0.650878	turquoise													Pav_sc0000588.1_g900.1.mk	0.487322	0.644615	turquoise
				Pav_sc0000146.1_g630.1.mk	0.487317	0.639049	turquoise													Pav_sc0000146.1_g630.1.mk	0.487317	0.634968	turquoise
				Pav_sc0000023.1_g280.1.mk	0.486268	0.310125	turquoise													Pav_sc0000023.1_g280.1.mk	0.486268	0.103485	turquoise
				Pav_sc0000009.1_g1210.1.mk	0.484367	0.638114	turquoise													Pav_sc0000009.1_g1210.1.mk	0.484367	0.656013	turquoise
				Pav_sc0000636.1_g160.1.br	0.480238	0.420703	turquoise													Pav_sc0000636.1_g160.1.br	0.480238	0.427378	turquoise
				Pav_sc0000480.1_g920.1.mk	-0.479793	-0.492215	turquoise													Pav_sc0000480.1_g920.1.mk	-0.479793	-0.457558	turquoise
				Pav_sc0000065.1_g400.1.mk	-0.477606	-0.524263	turquoise													Pav_sc0000065.1_g400.1.mk	-0.477606	-0.447672	turquoise
				Pav_sc0000544.1_g470.1.br	-0.477112	-0.443779	turquoise													Pav_sc0000544.1_g470.1.br	-0.477112	-0.331812	turquoise
				Pav_sc0000333.1_g050.1.mk	0.477061	0.572472	turquoise													Pav_sc0000333.1_g050.1.mk	0.477061	0.562264	turquoise
				Pav_sc0000254.1_g1090.1.mk	-0.476251	-0.504345	turquoise													Pav_sc0000254.1_g1090.1.mk	-0.476251	-0.46589	turquoise
				Pav_sc0000793.1_g230.1.mk	-0.476068	-0.542265	turquoise													Pav_sc0000793.1_g230.1.mk	-0.476068	-0.471889	turquoise
				Pav_sc0000766.1_g030.1.mk	0.476055	0.524946	turquoise													Pav_sc0000766.1_g030.1.mk	0.476055	0.434563	turquoise
				Pav_sc0000869.1_g530.1.mk	0.473061	0.395422	turquoise													Pav_sc0000869.1_g530.1.mk	0.473061	0.336714	turquoise
				Pav_sc0000138.1_g580.1.mk	-0.472229	-0.377401	turquoise													Pav_sc0000138.1_g580.1.mk	-0.472229	-0.237861	turquoise
				Pav_sc0000428.1_g300.1.mk	-0.472104	-0.459329	turquoise													Pav_sc0000428.1_g300.1.mk	-0.472104	-0.461661	turquoise
				Pav_sc0000257.1_g360.1.mk	0.471433	0.522281	turquoise													Pav_sc0000257.1_g360.1.mk	0.471433	0.442031	turquoise
				Pav_sc0001309.1_g840.1.mk	-0.468994	-0.482497	turquoise													Pav_sc0001309.1_g840.1.mk	-0.468994	-0.476421	turquoise
				Pav_sc0002360.1_g070.1.mk	-0.468482	-0.532839	turquoise													Pav_sc0002360.1_g070.1.mk	-0.468482	-0.534244	turquoise
				Pav_sc0000065.1_g250.1.br	0.466839	0.518406	turquoise													Pav_sc0000065.1_g250.1.br	0.466839	0.423156	turquoise
				Pav_sc0002828.1_g580.1.mk	0.466563	0.295881	turquoise													Pav_sc0002828.1_g580.1.mk	0.466563	0.171031	turquoise
				Pav_sc0000418.1_g350.1.mk	0.466339	0.180696	turquoise													Pav_sc0000418.1_g350.1.mk	0.466339	0.0424713	turquoise
				Pav_sc0000257.1_g1350.1.mk	0.465685	0.39107	turquoise													Pav_sc0000257.1_g1350.1.mk	0.465685	0.43487	turquoise
				Pav_sc0000078.1_g070.1.mk	0.465161	0.446071	turquoise													Pav_sc0000078.1_g070.1.mk	0.465161	0.527807	turquoise
				Pav_sc0004628.1_g060.1.br	0.463732	0.373797	turquoise													Pav_sc0004628.1_g060.1.br	0.463732	0.249105	turquoise
				Pav_sc0001051.1_g080.1.mk	0.463541	0.207761	turquoise													Pav_sc0001051.1_g080.1.mk	0.463541	0.142964	turquoise
				Pav_sc0000886.1_g860.1.br	0.462482	0.654047	turquoise													Pav_sc0000886.1_g860.1.br	0.462482	0.696504	turquoise
				Pav_sc0012345.1_g010.1.br	-0.458478	-0.523988	turquoise													Pav_sc0012345.1_g010.1.br	-0.458478	-0.579047	turquoise
				Pav_sc0002106.1_g110.1.br	-0.458472	-0.442534	turquoise													Pav_sc0002106.1_g110.1.br	-0.458472	-0.431378	turquoise
				Pav_sc0003473.1_g010.1.mk	0.453555	0.328798	turquoise													Pav_sc0003473.1_g010.1.mk	0.453555	0.156676	turquoise
				Pav_sc0000851.1_g010.1.br	0.45022	0.46031	turquoise													Pav_sc0000851.1_g010.1.br	0.45022	0.347379	turquoise
				Pav_sc0000543.1_g590.1.mk	0.448701	0.195937	turquoise													Pav_sc0000543.1_g590.1.mk	0.448701	0.0807205	turquoise
				Pav_sc0000848.1_g040.1.mk	0.448219	0.39794	turquoise													Pav_sc0000848.1_g040.1.mk	0.448219	0.479932	turquoise
[truncated: 156 more rows]

## Sheet: S6
table S6 candidate genes' modules,names and Gene IDs
Module	Gene name	Gene ID
[truncated: 66 more rows]

## Sheet: S7
table S7 all pearson’s correlation coefficient between candidate genes and two anthocyanin components
[truncated: 568 more rows]
